# Supplementary material for: National, regional, and state-level burden of Streptococcus pneumoniae and Haemophilus influenzae type b disease in children in India: modelled estimates for 2000–15
Source: PubMed Central journal article supplement (PMC6527518; doi:10.1016/s2214-109x(19)30081-6), 2019-05-13
Supplement: mmc1.pdf [file mmc1.pdf]

# THE LANCET

## Global Health

### Supplementary appendix

This appendix formed part of the original submission and has been peer reviewed. We post it as supplied by the authors.

Supplement to: Wahl B, Sharan A, Knoll MD, et al. National, regional, and state-level burden of *Streptococcus pneumoniae* and *Haemophilus influenzae* type b disease in children in India: modelled estimates for 2000–15. *Lancet Glob Health* 2019; 7: e735–47

## The state-level burden of *Streptococcus pneumoniae* and *Haemophilus influenzae* type b disease in children 1-59 months of age in India from 2000-2015

Brian Wahl,<sup>\*1</sup> Apoorva Sharan,<sup>\*2</sup> Maria Deloria Knoll,<sup>1</sup> Rajesh Kumar,<sup>3</sup> Li Liu,<sup>4,5</sup> Yue Chu,<sup>4</sup> David A McAllister,<sup>6</sup> Harish Nair,<sup>7,8</sup> Harry Campbell,<sup>7</sup> Igor Rudan,<sup>7</sup> Usha Ram,<sup>9</sup> Molly Sauer,<sup>1</sup> Anita Shet,<sup>1</sup> Robert Black,<sup>4</sup> Mathuram Santosham,<sup>1</sup> Katherine L O'Brien,<sup>1\*\*</sup> Narendra K Arora,<sup>2\*\*</sup>

<sup>1</sup> International Vaccine Access Center (IVAC), Department of International Health, Johns Hopkins Bloomberg School of Public Health, Baltimore, Maryland, USA

<sup>2</sup> The INCLEN Trust, New Delhi, India

<sup>3</sup> School of Public Health, Post Graduate Institute of Medical Education and Research, Chandigarh, India

<sup>4</sup> Institute for International Programs, Department of International Health, Johns Hopkins Bloomberg School of Public Health, Baltimore, Maryland, USA

<sup>5</sup> Department of Population, Family and Reproductive Health, Johns Hopkins Bloomberg School of Public Health, Baltimore, Maryland, USA

<sup>6</sup> Institute of Health and Wellbeing, University of Glasgow, Glasgow, Scotland, UK

<sup>7</sup> Centre for Global Health Research, Usher Institute of Population Health Sciences and Informatics, Medical School, The University of Edinburgh, Edinburgh, Scotland, UK

<sup>8</sup> Public Health Foundation of India, New Delhi, India

<sup>9</sup> Department of Public Health & Mortality Studies, International Institute for Population Sciences, Mumbai, India

**Correspondence:** Brian Wahl, International Vaccine Access Center (IVAC), Department of International Health, Johns Hopkins Bloomberg School of Public Health, 415 N Washington Street, Floor 5, Baltimore, MD 21231, USA, [bwahl@jhu.edu](mailto:bwahl@jhu.edu)

**भारत में बच्चों में स्ट्रेप्टोकोकस न्यूमोनिये और हीमोफिलस इन्फ्लुएंजे टाइप बी प्रकार के रोग के राष्ट्रीय, क्षेत्रीय, और राज्य-स्तर का बोझ: 2000-2015 के लिए मॉडल किए गए अनुमान**

ब्रायन वाहल पी.एच.डी.,<sup>1</sup> अपूर्वा शरन एस.सी.एम.,<sup>2</sup> मारिया डेलोरिया नोल पी.एच.डी.,<sup>1</sup> प्रो० राजेश कुमार एम.डी.,<sup>3</sup> ली लियू पी.एच.डी.,<sup>4,5</sup> युए चू एम.एस.पी.एच.,<sup>4</sup> डेविड ए मैकलिस्टर एम.डी.,<sup>6</sup> प्रो० हरीश नायर पी.एच.डी.,<sup>7,8</sup> प्रो० हेरी कैपबेल एम.डी.,<sup>7</sup> प्रो० इगोर रुदन एम.डी.,<sup>7</sup> प्रो० ऊषा राम पी.एच.डी.,<sup>9</sup> मौली सौएर एम.पी.एच.,<sup>1</sup> अनीता शेट एम.डी.,<sup>1</sup> प्रो० रॉबर्ट ब्लैक एम.डी.,<sup>4</sup> प्रो० मथुराम संतोषम एम.डी.,<sup>1</sup> प्रो० कैथरीन एल ओ'ब्रायन एम.डी.,<sup>1</sup> प्रो० नेंद्र के अरोड़ा एम.डी.<sup>2</sup>\*\*

<sup>1</sup> अंतर्राष्ट्रीय वैक्सीन प्रवेश केंद्र (आइवाक), अंतर्राष्ट्रीय स्वास्थ्य विभाग, जॉन्स हॉपकिंस ब्लूमबर्ग स्कूल ऑफ पब्लिक हेल्थ, बाल्टीमोर, मैरीलैंड, यू.एस.ए.

<sup>2</sup> इन्क्लेन ट्रस्ट इंटरनेशनल, नई दिल्ली, भारत

<sup>3</sup> स्कूल ऑफ पब्लिक हेल्थ, पोस्ट ग्रेजुएट इंस्टीट्यूट ऑफ मेडिकल एजुकेशन एंड रिसर्च, चंडीगढ़, भारत

<sup>4</sup> अंतर्राष्ट्रीय कार्यक्रमों के लिए संस्थान, अंतर्राष्ट्रीय स्वास्थ्य विभाग, जॉन्स हॉपकिंस ब्लूमबर्ग स्कूल ऑफ पब्लिक हेल्थ, बाल्टीमोर, मैरीलैंड, यू.एस.ए.

<sup>5</sup> जनसंख्या, परिवार और प्रजनन स्वास्थ्य विभाग, जॉन्स हॉपकिंस ब्लूमबर्ग स्कूल ऑफ पब्लिक हेल्थ, बाल्टीमोर, मैरीलैंड, यू.एस.ए.

<sup>6</sup> स्वास्थ्य और कल्याण संस्थान, ग्लासगो विश्वविद्यालय, ग्लासगो, स्कॉटलैंड, यू.के.

<sup>7</sup> ग्लोबल हेल्थ रिसर्च सेन्टर, उशर इंस्टीट्यूट ऑफ पोपुलेशन हेल्थ साइंसेज एंड इंफॉर्मेटिक्स, मेडिकल स्कूल, द यूनिवर्सिटी ऑफ एडिनबर्ग, एडिनबर्ग, स्कॉटलैंड, यू.के.

<sup>8</sup> पब्लिक हेल्थ फाउंडेशन ऑफ इंडिया, नई दिल्ली, भारत

<sup>9</sup> पब्लिक हेल्थ और मृत्यु दर विभाग, अंतर्राष्ट्रीय जनसंख्या विज्ञान संस्थान, मुंबई, भारत

**पत्राचार:** Brian Wahl, International Vaccine Access Center (IVAC), Department of International Health, Johns Hopkins Bloomberg School of Public Health, 415 N Washington Street, Floor 5, Baltimore, MD 21231, USA, [bwahl@jhu.edu](mailto:bwahl@jhu.edu)

**पृष्ठभूमि:** भारत का दुनिया में बचपन की बीमारियों के लिए अधिकतर योगदान है। नीतियों को सूचित करने और बाल स्वास्थ्य लक्ष्यों को प्राप्त करने की दिशा में प्रगति को मापने के लिए, हमने 2000 और 2015 के बीच स्ट्रेप्टोकोकस न्यूमोनिजे और हीमोफिलस इन्फ्लुएंजे टाइप बी के लिए वार्षिक राष्ट्रीय और राज्य-विशिष्ट बचपन मृत्यु दर और रोगों की तरफ योगदान का अनुमान लगाया।

**विधियाँ:** वैक्सीन क्लिनिकल परीक्षण डेटा का उपयोग न्यूमोकोकस और हिब के कारण निमोनिया से होने वाली मौतों के अनुपात का अनुमान लगाने के लिए किया गया था। मेनिन्जाइटिस से होने वाली मौतों में जिम्मेदार प्रत्येक रोगाणु के लिए का अनुपात रोगाणु-विशेष मेनिन्जाइटिस मामले की घातकता और जीवाणु मेनिन्जाइटिस मामले की स्थिति के कारणों के तरीके के (एटिओलॉजी) डेटा को निगरानी अध्ययनों से लिया गया था। हमने विश्व स्वास्थ्य संगठन (WHO) मातृ एवं शिशु महामारी विज्ञान आकलन (MCEE) सहयोग (WHO/MCEE) द्वारा भारत में मौखिक शव परीक्षण अध्ययनों के आधार पर तैयार किए गए 2000 से 2015 तक मॉडल-विशेष निमोनिया और मेनिन्जाइटिस से होने वाली मौतों के अनुपातों को लागू किया। न्यूमोकोकस और हिब के कारण नैदानिक (क्लीनिकल) और गंभीर निमोनिया के मामलों का बोझ टीका नैदानिक परीक्षण डेटा का उपयोग करके और भारत से जोखिम कारक प्रसार डेटा का उपयोग करके डब्ल्यूएचओ/एमसीईई द्वारा तैयार राज्य-विशेष सभी कारण निमोनिया मामलों का अनुमान निर्धारित किया गया था। रोगाणु-विशेष मेनिन्जाइटिस के मामलों को राज्य-स्तरीय मॉडल-विशेष मेनिन्जाइटिस से हुई मौतों और राज्य-स्तरीय मेनिन्जाइटिस के मामलों के घातक अनुमानों से लिया गया था। गैर-निमोनिया, मेनिन्जाइटिस (एनपीएनएम) के कारण न्यूमोकोकल और हिब रोगाणु आक्रामक लक्षणों को रोगाणु-विशेष एनपीएनएम (NPNM) से रोगाणु-विशेष मेनिन्जाइटिस मामलों को राज्य स्तर रोगाणु-विशेष मेनिन्जाइटिस मामलों के अनुपात को लागू कर प्राप्त किया गया। रोगाणु-विशेष NPNM के कारण मृत्यु की गणना न्यूमोकोकल और हिब मेनिन्जाइटिस मामले की मृत्यु दर के अनुपात का उपयोग करके न्यूमोकोकल और हिब मेनिन्जाइटिस NPNM मामले की मृत्यु दर के साथ की गई। भारत जनगणना के मुद्दे आंकड़े जनसंख्या को जोखिम में दर्शाते हैं।

**निष्कर्ष:** भारतीय बच्चों में (1-59 महीने) न्यूमोकोकल और हिब के मामलों में मृत्यु का अनुमान 166,000 से गिर कर (अनिश्चित रेंज [यूआर]: 110,000-198,000) और 82,600 (UR: 52,300-112,000) मृत्यु 2000 से 68,700 (UR: 44,600-86,000) और 15,600 (UR: 9,800-21,500) मृत्यु 2015 में क्रमशः था। यह न्यूमोकोकल मौतों में 58% (UR: 22-78%) की गिरावट को दर्शाता है और हिब से हुई मौतों में 81% (UR: 59-91%) की गिरावट है। 2015 के राष्ट्रीय न्यूमोकोकल और हिब मृत्यु दर 56 (यूआर: 37-71) और 13 (यूआर: 8-18) प्रति 100,000 बच्चों (1-59 महीने) की मृत्यु क्रमशः थी। 2015 में उत्तर प्रदेश (18,900 [यूआर: 12,300-23,600]) और बिहार (8,600 [5,600-10,700]) में सबसे ज्यादा न्यूमोकोकल मौतें हुईं। उत्तर प्रदेश (9,300 [यूआर: 5,900-12,700]) और ओडिशा (1,100 [यूआर: 700]-1,500) में 2015 में सबसे अधिक हिब मौतें हुईं। न्यूमोकोकस के कारण निमोनिया से होने वाली मौतों के अनुपात से संबंधित रूढ़िवादी धारणाएं बताती हैं कि भारत में 2015 में कुल निमोनिया से 118,000 (UR: 69,000-140,000) मौतें हो सकती हैं।

**व्याख्या:** संयुक्त (कॉजुगेट) टीके के राष्ट्रव्यापी कार्यान्वयन से पहले ही 2000 के बाद से भारत में 1-59 महीने के बच्चों में न्यूमोकोकल और हिब से मृत्यु दर में गिरावट आई है। कई राज्यों में हिब वैक्सीन (टीका) की शुरुआत से हिब रोग से जुड़ी रुग्णता और मृत्यु दर में अधिक तेजी से कमी आई। न्यूमोकोकल कंजुगेट वैक्सीन (पीसीवी टीका) का तेजी से और व्यापक पैमाने पर उपयोग और हिब वैक्सीन (टीका) का निरंतर उपयोग भारत में पीड़ित बच्चों के स्वास्थ्य लक्ष्यों को तेजी से प्राप्त करने में मदद कर सकता है।

## Webappendix 1: GATHER checklist

**Table 1: GATHER Checklist**

| GATHER checklist item                                                                                                                                                                                                                                                                                                                             | Section(s) or sources providing information                                                                                                                                                                                          |
|---------------------------------------------------------------------------------------------------------------------------------------------------------------------------------------------------------------------------------------------------------------------------------------------------------------------------------------------------|--------------------------------------------------------------------------------------------------------------------------------------------------------------------------------------------------------------------------------------|
| <b>Objectives and funding</b>                                                                                                                                                                                                                                                                                                                     |                                                                                                                                                                                                                                      |
| 1. Define the indicators, populations, and time periods for which estimates were made.                                                                                                                                                                                                                                                            | Indicators, populations, and time periods provided in methods section.                                                                                                                                                               |
| 2. List the funding sources for the work.                                                                                                                                                                                                                                                                                                         | Funding source provided in summary section.                                                                                                                                                                                          |
| <b>Data inputs</b>                                                                                                                                                                                                                                                                                                                                |                                                                                                                                                                                                                                      |
| 3. Describe how the data were identified and how the data were accessed.                                                                                                                                                                                                                                                                          | Data identification and collection approaches provided in methods section and in previous publications. <sup>1,2</sup>                                                                                                               |
| 4. Specify the inclusion and exclusion criteria. Identify all ad-hoc exclusions.                                                                                                                                                                                                                                                                  | Inclusion and exclusion criteria provided will be in webappendix and are in previous publications. <sup>1,2</sup>                                                                                                                    |
| 5. Provide information about all included data sources and their main characteristics. For each data source used, report reference information or contact name/institution, population represented, data collection method, years of data collection, sex and age range, diagnostic criteria or measurement method, and sample size, as relevant. | Data sources and characteristics provided in webappendix and in online open access database.                                                                                                                                         |
| 6. Identify and describe any categories of input data that have potentially important biases (e.g., based on characteristics listed in item 5).                                                                                                                                                                                                   | Potentially important biases provided in discussion.                                                                                                                                                                                 |
| 7. Describe and give sources for any other data inputs.                                                                                                                                                                                                                                                                                           | Other sources of data described in methods.                                                                                                                                                                                          |
| 8. Provide all data inputs in a file format from which data can be efficiently extracted, including all relevant meta-data listed in item 5. For any data inputs that cannot be shared because of ethical or legal reasons provide a contact name or the name of the institution that retains the right to the data.                              | Data inputs available in Excel spreadsheet in online open access database when appropriate. Data inputs that cannot be shared will be described in the webappendix with institutional contacts for potentially obtaining these data. |
| <b>Data analysis</b>                                                                                                                                                                                                                                                                                                                              |                                                                                                                                                                                                                                      |
| 9. Provide a conceptual overview of the data analysis method. A diagram may be helpful.                                                                                                                                                                                                                                                           | Conceptual model provided in Figure 1 of previous publication. <sup>3</sup>                                                                                                                                                          |
| 10. Provide a detailed description of all steps of the analysis, including mathematical formulae. This description should cover, as relevant, data cleaning, data pre-processing, data adjustments and weighting of data sources, and mathematical or statistical models.                                                                         | Detailed description of analysis provided in methods, appendix, and previous publications. <sup>1,3-5</sup>                                                                                                                          |
| 11. Describe how candidate models were evaluated and how the final models were selected.                                                                                                                                                                                                                                                          | Discussion of candidate model considerations provided in methods and discussed in detail in previous publication. <sup>3</sup>                                                                                                       |
| 12. Provide the results of an evaluation of model performance, if done, as well as the results of any relevant sensitivity analysis.                                                                                                                                                                                                              | Results of model performance at country-level provided in results and in the webappendix.                                                                                                                                            |
| 13. Describe methods of calculating uncertainty of the estimates. State which sources of uncertainty were, and were not, accounted for in the uncertainty analysis.                                                                                                                                                                               | Uncertainty methods and sources provided in methods.                                                                                                                                                                                 |
| 14. State how analytic or statistical source code used to generate estimates can be accessed.                                                                                                                                                                                                                                                     | Access to source code provided in online open access database.                                                                                                                                                                       |
| <b>Results and discussion</b>                                                                                                                                                                                                                                                                                                                     |                                                                                                                                                                                                                                      |
| 15. Provide published estimates in a file format from which data can be efficiently extracted.                                                                                                                                                                                                                                                    | Results in Excel spreadsheet provided in online open access database.                                                                                                                                                                |
| 16. Report a quantitative measure of the uncertainty of the estimates.                                                                                                                                                                                                                                                                            | Uncertainty intervals provided with all results in manuscript, will be in the webappendix, and online open access database.                                                                                                          |
| 17. Interpret results in light of existing evidence. If updating a previous set of estimates, describe the reasons for changes in estimates.                                                                                                                                                                                                      | Discussion of results relevant to existing research provided in research in context, results, and discussion.                                                                                                                        |
| 18. Discuss limitations of the estimates. Include a discussion of any modelling assumptions or data limitations that affect interpretation of the estimates.                                                                                                                                                                                      | Limitations of data and models provided in discussion.                                                                                                                                                                               |

## Webappendix 2: Data sources

**Table 2: Studies contributing to estimates of pathogen-specific meningitis case fatality ratio estimates in India stratified by child mortality setting**

| a. <i>Streptococcus pneumoniae</i>                                                                                                                                                                                                                                                                                                                                                                                                                                                                                                                                                                                                                                                                                                                                                                                                                                                                                                                                                                                                                                                                                                                                                                                                                                                                                                                                                                                                                                                                                                                                                                                                                                                                                                                                                                                                                                                                                                                                                                                                                                                                                                                                                                                                                                                                                                                                                                                                                                                                                                                                                                                                                                                                                                                                                                                                                                                                                                                                                                                                                                                                                                                                                                                                                                                                                                                                                                                                                                                                                                                                                                                                                                                                                                                                                                                                                                                                                                                                                                                                                                                                                                                                                                                                                                                                                                                                                                                                                                                                                                                                                                                                                                                                                                                                                                                                                                                                                                                                                                                                                                                                                                                                                                                                                                                                                                                                                                                                                                                                                                                                                                                                                                                                                                                                                                                                                                                                                                                                                                                                                                                                                                                                                                                                                                            |
|-------------------------------------------------------------------------------------------------------------------------------------------------------------------------------------------------------------------------------------------------------------------------------------------------------------------------------------------------------------------------------------------------------------------------------------------------------------------------------------------------------------------------------------------------------------------------------------------------------------------------------------------------------------------------------------------------------------------------------------------------------------------------------------------------------------------------------------------------------------------------------------------------------------------------------------------------------------------------------------------------------------------------------------------------------------------------------------------------------------------------------------------------------------------------------------------------------------------------------------------------------------------------------------------------------------------------------------------------------------------------------------------------------------------------------------------------------------------------------------------------------------------------------------------------------------------------------------------------------------------------------------------------------------------------------------------------------------------------------------------------------------------------------------------------------------------------------------------------------------------------------------------------------------------------------------------------------------------------------------------------------------------------------------------------------------------------------------------------------------------------------------------------------------------------------------------------------------------------------------------------------------------------------------------------------------------------------------------------------------------------------------------------------------------------------------------------------------------------------------------------------------------------------------------------------------------------------------------------------------------------------------------------------------------------------------------------------------------------------------------------------------------------------------------------------------------------------------------------------------------------------------------------------------------------------------------------------------------------------------------------------------------------------------------------------------------------------------------------------------------------------------------------------------------------------------------------------------------------------------------------------------------------------------------------------------------------------------------------------------------------------------------------------------------------------------------------------------------------------------------------------------------------------------------------------------------------------------------------------------------------------------------------------------------------------------------------------------------------------------------------------------------------------------------------------------------------------------------------------------------------------------------------------------------------------------------------------------------------------------------------------------------------------------------------------------------------------------------------------------------------------------------------------------------------------------------------------------------------------------------------------------------------------------------------------------------------------------------------------------------------------------------------------------------------------------------------------------------------------------------------------------------------------------------------------------------------------------------------------------------------------------------------------------------------------------------------------------------------------------------------------------------------------------------------------------------------------------------------------------------------------------------------------------------------------------------------------------------------------------------------------------------------------------------------------------------------------------------------------------------------------------------------------------------------------------------------------------------------------------------------------------------------------------------------------------------------------------------------------------------------------------------------------------------------------------------------------------------------------------------------------------------------------------------------------------------------------------------------------------------------------------------------------------------------------------------------------------------------------------------------------------------------------------------------------------------------------------------------------------------------------------------------------------------------------------------------------------------------------------------------------------------------------------------------------------------------------------------------------------------------------------------------------------------------------------------------------------------------------------------------------------------------------|
| Low child mortality settings (<30 deaths per 1000 live births)                                                                                                                                                                                                                                                                                                                                                                                                                                                                                                                                                                                                                                                                                                                                                                                                                                                                                                                                                                                                                                                                                                                                                                                                                                                                                                                                                                                                                                                                                                                                                                                                                                                                                                                                                                                                                                                                                                                                                                                                                                                                                                                                                                                                                                                                                                                                                                                                                                                                                                                                                                                                                                                                                                                                                                                                                                                                                                                                                                                                                                                                                                                                                                                                                                                                                                                                                                                                                                                                                                                                                                                                                                                                                                                                                                                                                                                                                                                                                                                                                                                                                                                                                                                                                                                                                                                                                                                                                                                                                                                                                                                                                                                                                                                                                                                                                                                                                                                                                                                                                                                                                                                                                                                                                                                                                                                                                                                                                                                                                                                                                                                                                                                                                                                                                                                                                                                                                                                                                                                                                                                                                                                                                                                                                |
| <ul style="list-style-type: none"> <li>• Al Awaidy, et al. "Epidemiology of invasive pneumococcal infection among hospitalized children aged less than 5 years in Oman." <i>Vaccine</i> 30 (2012): G7-G10.</li> <li>• Al Ayed, et al. "Retrospective review of invasive pediatric pneumococcal diseases in a military hospital in the southern region of Saudi Arabia." <i>Annals of Saudi Medicine</i> 31.5 (2011): 469.</li> <li>• Al Musawi, M., et al. "A retrospective epidemiological study of invasive pneumococcal infections in children aged 0-5 years in Bahrain from 1 January 1999 to 31 December 2003." <i>Vaccine</i>. 2012. 30 Suppl 6:G2-6.</li> <li>• Andrade, A. L., et al. "Population-based surveillance for invasive pneumococcal disease and pneumonia in infants and young children in Goiania, Brazil." <i>Vaccine</i>. 2012. 30:1901-9</li> <li>• Batuwanthudawe, R., et al. "Surveillance of invasive pneumococcal disease in Colombo, Sri Lanka." <i>Clinical Infectious Diseases</i> 48.Supplement 2 (2009): S136-S140.</li> <li>• Benavides, J. A., et al. "Population-based surveillance for invasive pneumococcal disease and pneumonia in infants and young children in Bogota, Colombia." <i>Vaccine</i>. 2012. 30:5886-92</li> <li>• Biaukula, V. L., et al. "Meningitis in children in Fiji: etiology, epidemiology, and neurological sequelae." <i>International Journal of Infectious Diseases</i> 16.4 (2012): e289-e295.</li> <li>• Camou, T., et al. "Invasive pneumococcal diseases in Uruguayan children: comparison between serotype distribution and conjugate vaccine formulations." <i>Vaccine</i> 21.17 (2003): 2093-2096.</li> <li>• Chan, Iris Mei-Ching, et al. "Invasive pneumococcal disease in Hong Kong children." <i>J Pediatr Respiratory Critic Care</i> 9.2 (2013): 4-8.</li> <li>• Chavez, P., et al. "Meningitis bacteriana aguda: experiencia de 10 años." <i>Rev Chil Infectol</i>;11(2):92-98, 1994</li> <li>• Davidson, M., et al. "The Epidemiology of Invasive Pneumococcal Disease in Alaska, 1986-1990 Ethnic Differences and Opportunities for Prevention." <i>Journal of Infectious Diseases</i> 170.2 (1994): 368-376.</li> <li>• Dickinson M., et al., "Las meningoencefalitis bacterianas en la población infantil cubana: 1998-2000." <i>Revista Cubana de Pediatría</i> 74.2 (2002): 106-114.</li> <li>• Fortnum, H. M. and A. C. Davis. "Epidemiology of bacterial meningitis." <i>Archives of Disease in Childhood</i> 68.6 (1993): 763-767.</li> <li>• Grzesiowski, P., et al. "Invasive pneumococcal disease in children up to 5 years of age in Poland." <i>Eur J Clin Microbiol Infect Dis</i>. 2008. 27:883-5</li> <li>• Hanna J. N., et al. "Bacterial meningitis in children under five years of age in Western Australia. <i>Medical Journal of Australia</i>." 1991.;155:3,160-164</li> <li>• Harboe, Z. B., et al. "Pneumococcal serotypes and mortality following invasive pneumococcal disease: a population-based cohort study." <i>PLoS Med</i> 6.5 (2009): e1000081.</li> <li>• Ishikawa, T., et al. "Epidemiology of bacterial meningitis in children: Aichi prefecture, Japan, 1984-1993." <i>Pediatric Neurology</i>. 1996 Apr;14(3):244-250</li> <li>• Jansen, A. G., et al. "Invasive pneumococcal disease in the Netherlands: Syndromes, outcome and potential vaccine benefits." <i>Vaccine</i>. 2009. 27:2394-401</li> <li>• Johnson, A. P., et al. "Morbidity and mortality of pneumococcal meningitis and serotypes of causative strains prior to introduction of the 7-valent conjugant pneumococcal vaccine in England." <i>Journal of Infection</i> 55.5 (2007): 394-399.</li> <li>• Lagos, R., et al., "Age- and serotype-specific pediatric invasive pneumococcal disease: insights from systematic surveillance in Santiago, Chile, 1994-2007." <i>J Infect Dis</i>. 2008. 198:1809-17</li> <li>• Lagos, Z. R., et al. "Epidemiología de las enfermedades invasoras causadas por <i>Streptococcus pneumoniae</i> en niños chilenos: proyecciones clínicas y de salud pública." <i>Revista chilena de infectología</i> 18 (2001): 15-21.</li> <li>• Lim, L. H., et al. "Childhood invasive pneumococcal disease: a hospital-based study from Malaysia." <i>J Paediatr Child Health</i>. 2007. 43:366-9</li> <li>• Lucey, J. M., et al. "Pneumococcal meningitis: clinical outcomes in a pre-vaccine era at a Dublin paediatric hospital, 1999-2007." <i>Irish Journal of Medical Science</i> 180.1 (2011): 47-50.</li> <li>• McIntyre, P. B., et al., "A population based study of the impact of corticosteroid therapy and delayed diagnosis on the outcome of childhood pneumococcal meningitis." <i>Archives of Disease in Childhood</i>. 2005. 90:391-396</li> <li>• Memish, Z. A., et al., "Epidemiology of invasive pneumococcal infection in children aged five years and under in Saudi Arabia: a five-year retrospective surveillance study." <i>Int J Infect Dis</i>. 2010. 14:e708-12</li> <li>• Miller, E., et al. "Epidemiology of invasive and other pneumococcal disease in children in England and Wales 1996-1998." <i>Acta Paediatrica</i> 89.s435 (2000): 11-16.</li> <li>• Namani, S. R. K., et al. "Causative pathogens of bacterial meningitis in children and their susceptibility to antibiotics." <i>The Internet J Infect Dis</i> 9 (2010): 1-6.</li> <li>• Rendi-Wagner, P., et al. "Prospective surveillance of incidence, serotypes and antimicrobial susceptibility of invasive <i>Streptococcus pneumoniae</i> among hospitalized children in Austria." <i>Journal of Antimicrobial Chemotherapy</i>. 2004;53(5):826-831</li> <li>• Ríos, A. M., et al. "Impacto de la resistencia a antimicrobianos y de serotipos de <i>Streptococcus pneumoniae</i> en la mortalidad de niños menores de 5 años con enfermedad invasora." (1999).</li> <li>• Robinson, K. A., et al. "Epidemiology of invasive <i>Streptococcus pneumoniae</i> infections in the United States, 1995-1998: Opportunities for prevention in the conjugate vaccine era." <i>Jama</i> 285.13 (2001): 1729-1735.</li> <li>• Trotman, H., et al. "Pneumococcal meningitis in Jamaican children." <i>West Indian Medical Journal</i> 58.6 (2009): 585-588.</li> </ul> |

|                                                                                                                                                                                                                                                                                                                                                                                                                                                                                                                                                                                                                                                                                                                                                                                                                                                                                                                                                                                                                                                                                                                                                                                                                                                                                                                                                                                                                                                                                                                                                                                                                                                                                                                                                                                                                                                                                                                                                                                                                                                                                                                                                                                                                                                                                                                              |
|------------------------------------------------------------------------------------------------------------------------------------------------------------------------------------------------------------------------------------------------------------------------------------------------------------------------------------------------------------------------------------------------------------------------------------------------------------------------------------------------------------------------------------------------------------------------------------------------------------------------------------------------------------------------------------------------------------------------------------------------------------------------------------------------------------------------------------------------------------------------------------------------------------------------------------------------------------------------------------------------------------------------------------------------------------------------------------------------------------------------------------------------------------------------------------------------------------------------------------------------------------------------------------------------------------------------------------------------------------------------------------------------------------------------------------------------------------------------------------------------------------------------------------------------------------------------------------------------------------------------------------------------------------------------------------------------------------------------------------------------------------------------------------------------------------------------------------------------------------------------------------------------------------------------------------------------------------------------------------------------------------------------------------------------------------------------------------------------------------------------------------------------------------------------------------------------------------------------------------------------------------------------------------------------------------------------------|
| <ul style="list-style-type: none"> <li>Von Kries, R., et al. "Prediction of the potential benefit of different pneumococcal conjugate vaccines on invasive pneumococcal disease in German children." <i>Pediatric Infectious Disease Journal</i> 21.11 (2002): 1017-1023.</li> <li>Voss, L., et al. "Invasive pneumococcal disease in a pediatric population, Auckland, New Zealand." <i>Pediatric Infectious Disease Journal</i>. 1994;13(10):873-878</li> </ul>                                                                                                                                                                                                                                                                                                                                                                                                                                                                                                                                                                                                                                                                                                                                                                                                                                                                                                                                                                                                                                                                                                                                                                                                                                                                                                                                                                                                                                                                                                                                                                                                                                                                                                                                                                                                                                                            |
| <b>Medium child mortality settings (30-&lt;75 deaths per 1000 live births)</b>                                                                                                                                                                                                                                                                                                                                                                                                                                                                                                                                                                                                                                                                                                                                                                                                                                                                                                                                                                                                                                                                                                                                                                                                                                                                                                                                                                                                                                                                                                                                                                                                                                                                                                                                                                                                                                                                                                                                                                                                                                                                                                                                                                                                                                               |
| <ul style="list-style-type: none"> <li>Abujejo-Ladesma, E., et al. "Serious community-acquired paediatric infections in rural Asia (Bohol Island, Philippines): bacterial meningitis in children less than 5 years of age." <i>Scandinavian Journal of Infectious Diseases</i> 39.11-12 (2007): 983-989.</li> <li>Asturias, E. J., et al. "Meningitis and pneumonia in Guatemalan children: the importance of <i>Haemophilus influenzae</i> type b and <i>Streptococcus pneumoniae</i>." <i>Revista Panamericana de Salud Pública</i> 14.6 (2003): 377-384.</li> <li>Berkley, J. A., et al. "Bacteremia among children admitted to a rural hospital in Kenya." <i>New England Journal of Medicine</i> 352.1 (2005): 39-47.</li> <li>Capeding, Maria Rosario, et al. "Prospective surveillance study of invasive pneumococcal disease among urban children in the Philippines." <i>Pediatric Infectious Disease Journal</i> 32.10 (2013): e383-e389.</li> <li>Chhetri, U. D., et al. "Clinical profile of invasive pneumococcal disease in Patan Hospital, Nepal." <i>Kathmandu University Medical Journal</i> 9.1 (2012): 45-49.</li> <li>El Mdaghri, N., et al. "Epidemiological profile of invasive bacterial diseases in children in Casablanca, Morocco: antimicrobial susceptibilities and serotype distribution." <i>Eastern Mediterranean Health Journal</i> 18.11 (2012): 1097.</li> <li>Lovera, D., et al., "Risk factors for mortality in Paraguayan children with pneumococcal bacterial meningitis." <i>Tropical Medicine &amp; International Health</i> 10.12 (2005): 1235-1241.</li> <li>Reis, J. N., et al. "Population-based survey of antimicrobial susceptibility and serotype distribution of <i>Streptococcus pneumoniae</i> from meningitis patients in Salvador, Brazil." <i>Journal of Clinical Microbiology</i> 40.1 (2002): 275-277.</li> <li>Shah, A. S., et al. "Invasive pneumococcal disease in Kanti Children's Hospital, Nepal, as observed by the South Asian Pneumococcal Alliance network." <i>Clinical Infectious Diseases</i> 48.Supplement 2 (2009): S123-S128.</li> <li>Williams, E. J., et al. "Hospital-based surveillance of invasive pneumococcal disease among young children in urban Nepal." <i>Clinical Infectious Diseases</i> 48. Supplement 2 (2009): S114-S122.</li> </ul> |
| <b>High child mortality settings (75-&lt;150 deaths per 1000 live births)</b>                                                                                                                                                                                                                                                                                                                                                                                                                                                                                                                                                                                                                                                                                                                                                                                                                                                                                                                                                                                                                                                                                                                                                                                                                                                                                                                                                                                                                                                                                                                                                                                                                                                                                                                                                                                                                                                                                                                                                                                                                                                                                                                                                                                                                                                |
| <ul style="list-style-type: none"> <li>Al Khorasani, A., et al., "Bacterial profile and clinical outcome of childhood meningitis in rural Yemen: a 2-year hospital-based study." <i>Journal of Infection</i> 53.4 (2006): 228-234.</li> <li>Ba, O., et al. "Hospital surveillance of childhood bacterial meningitis in Senegal and the introduction of <i>Haemophilus influenzae</i> type b conjugate vaccine." <i>American Journal of Tropical Medicine and Hygiene</i> 83.6 (2010): 1330-1335.</li> <li>Iriso, R., et al. "Bacterial meningitis following introduction of Hib conjugate vaccine in northern Uganda." <i>Annals of Tropical Paediatrics</i> 28.3 (2008): 211-216.</li> <li>Khowaja, A. R., et al. "Mortality and neurodevelopmental outcomes of acute bacterial meningitis in children aged&lt; 5 years in Pakistan." <i>The Journal of Pediatrics</i> 163.1 (2013): S86-S91.</li> <li>Kisakye, A., et al. "Surveillance for <i>Streptococcus pneumoniae</i> meningitis in children aged&lt; 5 years: implications for immunization in Uganda." <i>Clinical Infectious Diseases</i> 48.Supplement 2 (2009): S153-S161.</li> <li>Menezes, Ana Paula de O., et al. "Serotype distribution and antimicrobial resistance of <i>Streptococcus pneumoniae</i> prior to introduction of the 10-valent pneumococcal conjugate vaccine in Brazil, 2000–2007." <i>Vaccine</i> 29.6 (2011): 1139-1144.</li> <li>Zaidi, A. K. M., et al. "Surveillance of pneumococcal meningitis among children in Sindh, southern Pakistan." <i>Clinical Infectious Diseases</i> 48.Supplement 2 (2009): S129-S135.</li> </ul>                                                                                                                                                                                                                                                                                                                                                                                                                                                                                                                                                                                                                                                                                                        |
| <b>Very high child mortality settings (&gt;=150 deaths per 1000 live births)</b>                                                                                                                                                                                                                                                                                                                                                                                                                                                                                                                                                                                                                                                                                                                                                                                                                                                                                                                                                                                                                                                                                                                                                                                                                                                                                                                                                                                                                                                                                                                                                                                                                                                                                                                                                                                                                                                                                                                                                                                                                                                                                                                                                                                                                                             |
| <ul style="list-style-type: none"> <li>Bercion, R., et al. "Acute bacterial meningitis at the 'Complexe Pédiatrique' of Bangui, Central African Republic." <i>Journal of Tropical Pediatrics</i> 54.2 (2008): 125-128.</li> <li>Bernard-Bonnin, A. C., et al. "Purulent meningitis in children in Yaounde: epidemiological and prognostic aspects." <i>Annales de la Societe Belge de Medecine Tropicale</i>. Vol. 65. No. 1. 1984.</li> <li>Falade, A. G., et al. "Invasive pneumococcal disease in children aged&lt; 5 years admitted to 3 urban hospitals in Ibadan, Nigeria." <i>Clinical Infectious Diseases</i> 48.Supplement 2 (2009): S190-S196.</li> <li>Tall, F. R., et al. "<i>Haemophilus influenzae</i> meningitis in a hospital in Burkina-Faso." <i>Medecine et Maladies Infectieuses</i>. 1992;22(12):1173-1177</li> <li>Yaro, S., et al. "The epidemiology of <i>Haemophilus influenzae</i> type b meningitis in Burkina Faso." <i>Pediatric Infectious Disease Journal</i> 25.5 (2006): 415-419.</li> </ul>                                                                                                                                                                                                                                                                                                                                                                                                                                                                                                                                                                                                                                                                                                                                                                                                                                                                                                                                                                                                                                                                                                                                                                                                                                                                                                |
| <b>b. <i>Haemophilus influenzae</i> type b (Hib)</b>                                                                                                                                                                                                                                                                                                                                                                                                                                                                                                                                                                                                                                                                                                                                                                                                                                                                                                                                                                                                                                                                                                                                                                                                                                                                                                                                                                                                                                                                                                                                                                                                                                                                                                                                                                                                                                                                                                                                                                                                                                                                                                                                                                                                                                                                         |
| <b>Low child mortality settings (&lt;30 deaths per 1000 live births)</b>                                                                                                                                                                                                                                                                                                                                                                                                                                                                                                                                                                                                                                                                                                                                                                                                                                                                                                                                                                                                                                                                                                                                                                                                                                                                                                                                                                                                                                                                                                                                                                                                                                                                                                                                                                                                                                                                                                                                                                                                                                                                                                                                                                                                                                                     |
| <ul style="list-style-type: none"> <li>Almuneef, M., et al. "Childhood bacterial meningitis in Saudi Arabia." <i>Journal of Infection</i> 36.2 (1998): 157-160.</li> <li>Anh, Dang D., et al. "<i>Haemophilus influenzae</i> type B meningitis among children in Hanoi, Vietnam: epidemiologic patterns and estimates of H. <i>Influenzae</i> type B disease burden." <i>American Journal of Tropical Medicine and Hygiene</i> 74.3 (2006): 509-515.</li> <li>Anh, D. D., et al. "Surveillance of pneumococcal-associated disease among hospitalized children in Khanh Hoa Province, Vietnam." <i>Clinical Infectious Diseases</i> 48.Supplement 2 (2009): S57-S64.</li> <li>Barton-Forbes, M. A., et al., "Epidemiology of <i>Haemophilus influenzae</i> invasive disease in Jamaica, 1990-1993." <i>West Indian Medical Journal</i> 49.3 (2000): 200-204.</li> <li>Batuwanthudawe, R., et al. "Surveillance of invasive pneumococcal disease in Colombo, Sri Lanka." <i>Clinical Infectious Diseases</i> 48.Suppl. 2 (2009): S136-S140.</li> </ul>                                                                                                                                                                                                                                                                                                                                                                                                                                                                                                                                                                                                                                                                                                                                                                                                                                                                                                                                                                                                                                                                                                                                                                                                                                                                         |

- Batuwanthudawe, R., et al. "Incidence of childhood *Haemophilus influenzae* type b meningitis in Sri Lanka." *International Journal of Infectious Diseases* 14.5 (2010): e372-e376.
- Boehme, C., et al. "Three years of acute bacterial meningitis in the pediatric service at the Temuco Regional Hospital." *Revista Medica de Chile* 121.6 (1993): 633-638.
- Booy, R., et al. "Invasive *Haemophilus influenzae* type b disease in the Oxford region (1985-91)." *Archives of Disease in Childhood* 69.2 (1993): 225-228.
- Bower, C., et al. "Sequelae of *Haemophilus influenzae* type b meningitis in Aboriginal and non-Aboriginal children under 5 years of age." *Journal of Paediatrics and Child Health* 30.5 (1994): 393-397.
- Chavez, P., et al. "Meningitis bacteriana aguda: experiencia de 10 años." *Rev. Chil. Infectol* 11.2 (1994): 92-8.
- Chen, M. K., et al. "Prospective surveillance of children with invasive *Haemophilus influenzae* disease in Taiwan." *Journal of Microbiology, Immunology, and Infection* 32.4 (1999): 257-260.
- Dagan, R., et al. "Epidemiology of pediatric meningitis caused by *Haemophilus influenzae* type b, *Streptococcus pneumoniae*, and *Neisseria meningitidis* in Israel: a 3-year nationwide prospective study." *Journal of Infectious Diseases* 169.4 (1994): 912-916.
- De Jonghe, M. and G. Glaesener. "Type B *Haemophilus influenzae* infections. Experience at the pediatric hospital of Luxembourg." *Bulletin de la Société des Sciences Médicales du Grand-Duché de Luxembourg* 132.2 (1995): 17.
- Dickinson, M., et al. "Las meningoencefalitis bacterianas en la población infantil cubana: 1998-2000." *Revista Cubana de Pediatría* 74.2 (2002): 106-114.
- Fortnum, H. M. and A. C. Davis. "Epidemiology of bacterial meningitis." *Archives of disease in childhood* 68.6 (1993): 763-767.
- Gilbert, G. L., et al. "Clinical manifestations and outcome of *Haemophilus influenzae* type b disease." *Journal of Paediatrics and Child Health* 31.2 (1995): 99-104.
- Halfon-yaniv, I., et al., "Epidemiology of invasive *Haemophilus influenzae* type b infections in Bedouins and Jews in Southern Israel." *Pediatric Infectious Disease Journal* 9.5 (1990): 321-325.
- Ishikawa, T., et al. "Epidemiology of bacterial meningitis in children: Aichi Prefecture, Japan, 1984–1993." *Pediatric Neurology* 14.3 (1996): 244-250.
- Kamiya, Hitoshi, et al. "Childhood bacterial meningitis in Japan." *Pediatric Infectious Disease Journal* 17.9 (1998): S183-S185.
- Kristensen, K., et al. "Epidemiology of *Haemophilus influenzae* type b infections among children in Denmark in 1985 and 1986." *Acta Paediatrica* 79.6-7 (1990): 587-592.
- McIntyre, P. B., et al. "Invasive *Haemophilus influenzae* type b disease in Sydney children 1985-1987: a population-based study." *Medical Journal of Australia* 154.12 (1991): 832-837.
- McIntyre, P., et al. "The outcome of childhood *Haemophilus influenzae* meningitis. A population based study." *Medical Journal of Australia* 159.11-12 (1992): 766-772.
- Muangchana, C., et al. "Bacterial meningitis incidence in Thai children estimated by a rapid assessment tool." *Southeast Asian Journal of Tropical Medicine and Public Health* 40.3 (2009): 553.
- Namani, S., et al. "Causative pathogens of bacterial meningitis in children and their susceptibility to antibiotics." *Journal of Infectious Disease* 9 (2010): 1-6.
- Rauter, L., and I. Mutz. "*Haemophilus influenzae* meningitis 1983 to 1992--epidemiology and sequelae of the disease." *Wiener Klinische Wochenschrift* 106.7 (1993): 187-192.
- Reinert, P., et al. "Epidemiology of *Haemophilus influenzae* type b disease in France." *Vaccine* 11 (1993): S38-S42.
- Schoendorf, K. C., et al. "National trends in *Haemophilus influenzae* meningitis mortality and hospitalization among children, 1980 through 1991." *Pediatrics* 93.4 (1994): 663-668.
- Zaki, M., et al. "Childhood bacterial meningitis in Kuwait." *Journal of Tropical Medicine and Hygiene* 93.1 (1990): 7-11.

#### Medium child mortality settings (30-<75 deaths per 1000 live births)

- Abucejo-Ladesma, E., et al. "Serious community-acquired paediatric infections in rural Asia (Bohol Island, Philippines): bacterial meningitis in children less than 5 years of age." *Scandinavian Journal of Infectious Diseases* 39.11-12 (2007): 983-989.
- Ansari, I., et al. "Culture proven bacterial meningitis in children: agents, clinical profile and outcome." *Kathmandu Univ Med J.* 2011. 9:36-40
- Asturias, Edwin J., et al. "Meningitis and pneumonia in Guatemalan children: the importance of *Haemophilus influenzae* type b and *Streptococcus pneumoniae*." *Revista Panamericana de Salud Pública* 14.6 (2003): 377-384.
- Basualdo, W., et al. "Invasive *Haemophilus influenzae* type b infections in children in Paraguay." *Archives of Medical Research* 35.2 (2004): 126-133.
- El Mdaghri, N., et al. "Epidemiological profile of invasive bacterial diseases in children in Casablanca, Morocco: antimicrobial susceptibilities and serotype distribution." *Eastern Mediterranean Health Journal* 18.11 (2012): 1097.
- Hussey, G., et al. "Epidemiology of invasive *Haemophilus influenzae* infections in Cape Town, South Africa." *Annals of Tropical Paediatrics* 14.2 (1994): 97-103.
- Limcangco, M. R. T., et al. "Epidemiology of *Haemophilus influenzae* type b meningitis in Manila, Philippines, 1994 to 1996." *Pediatric Infectious Disease Journal* 19.1 (2000): 7-11.
- Luby, S. P., et al. "A low-cost approach to measure the burden of vaccine preventable diseases in urban areas." *Vaccine* 28.31 (2010): 4903-4912.
- Mendsaikhan, Jamsran, et al. "Childhood bacterial meningitis in Ulaanbaatar, Mongolia, 2002–2004." *Clinical Infectious Diseases* 48.Supplement 2 (2009): S141-S146.
- Minz, S., et al. "Incidence of *Haemophilus influenzae* type b meningitis in India." *Indian Journal of Medical Research* 128.1 (2008): 57.



- Ribeiro, G. S., et al. "Prevention of *Haemophilus influenzae* type b (Hib) meningitis and emergence of serotype replacement with type a strains after introduction of Hib immunization in Brazil." *Journal of Infectious Diseases* 187.1 (2003): 109-116.
- Saha, S. K., et al. "The increasing burden of disease in Bangladeshi children due to *Haemophilus influenzae* type b meningitis." *Annals of Tropical Paediatrics* 17.1 (1997): 5-8.
- Shah, A. S., et al. "Invasive pneumococcal disease in Kanti Children's Hospital, Nepal, as observed by the South Asian Pneumococcal Alliance network." *Clinical Infectious Diseases* 48.Supplement 2 (2009): S123-S128.
- Simões, L. L. P., et al. "Impact of *Haemophilus influenzae* b (Hib) vaccination on meningitis in Central Brazil." *Revista de Saude Publica* 38.5 (2004): 664-670.
- Torres, A., et al. "Infecciones invasivas por *Haemophilus influenzae* tipo b (Hib) en Tucumán-Argentina." *Arch. Argent. Pediatr* 93.4 (1995): 238-44.
- Weiss, D. P.L., et al. "Epidemiology of bacterial meningitis among children in Brazil, 1997-1998." *Revista de Saude Publica* 35.3 (2001): 249-255.

#### High child mortality settings (75-<150 deaths per 1000 live births)

- Adegbola, R. A., et al. "*Haemophilus influenzae* type b disease in the western region of The Gambia: background surveillance for a vaccine efficacy trial." *Annals of Tropical Paediatrics* 16.2 (1996): 103-111.
- Invasive Bacterial Infections Surveillance (IBIS) Group of the International Clinical Epidemiology Network. "Are *Haemophilus influenzae* infections a significant problem in India? A prospective study and review." *Clinical Infectious Diseases* 34.7 (2002): 949-957.
- Khowaja, A. R., et al. "Mortality and neurodevelopmental outcomes of acute bacterial meningitis in children aged < 5 years in Pakistan." *Journal of Pediatrics* 163.1 (2013): S86-S91.
- Koko, J., et al. "Bacterial meningitis in children in Libreville, Gabon. Epidemiologic, therapeutic and prognostic features." *Medecine et Maladies Infectieuses* 30.1 (2000): 50-56.
- Lewis, R. F., et al. "Action for child survival: elimination of *Haemophilus influenzae* type b meningitis in Uganda." *Bulletin of the World Health Organization* 86.4 (2008): 292-301.
- Zaidi, A. K. M., et al. "Surveillance of pneumococcal meningitis among children in Sindh, southern Pakistan." *Clinical Infectious Diseases* 48.Supplement 2 (2009): S129-S135.

#### Very high child mortality settings (>=150 deaths per 1000 live births)

- Bercion, R., et al. "Acute bacterial meningitis at the 'Complexe Pédiatrique' of Bangui, Central African Republic." *Journal of Tropical Pediatrics* 54.2 (2008): 125-128.
- Bernard-Bonnin, A. C., et al. "Purulent meningitis in children in Yaounde: epidemiological and prognostic aspects." *Annales de la Societe Belge de Medecine Tropicale*. Vol. 65. No. 1. 1984.
- Bijlmer, H. A., et al. "The epidemiology of *Haemophilus influenzae* meningitis in children under five years of age in The Gambia, West Africa." *Journal of Infectious Diseases* 161.6 (1990): 1210-1215.
- Campagne, G., et al. "Epidemiology of bacterial meningitis in Niamey, Niger, 1981-96." *Bulletin of the World Health Organization* 77.6 (1999): 499.
- Lagunju, I. A., et al. "Childhood bacterial meningitis in Ibadan, Nigeria--antibiotic sensitivity pattern of pathogens, prognostic indices and outcome." *African Journal of Medicine and Medical sciences* 37.2 (2008): 185-191.
- Molyneux, E., et al. "Acute bacterial meningitis in children admitted to the Queen Elizabeth Central Hospital, Blantyre, Malawi in 1996-97." *Tropical Medicine & International Health* 3.8 (1998): 610-618.
- Muhe, L., et al. "Pneumococcal and *Haemophilus influenzae* meningitis in a children's hospital in Ethiopia: serotypes and susceptibility patterns." *Tropical Medicine & International Health* 4.6 (1999): 421-427.
- Tall, F. R., et al. "*Haemophilus influenzae* meningitis in a hospital in Burkina-Faso." *Medecine et Maladies Infectieuses*. 1992;22(12):1173-1177
- Yaro, S., et al. "The epidemiology of *Haemophilus influenzae* type b meningitis in Burkina Faso." *Pediatric Infectious Disease Journal* 25.5 (2006): 415-419.

**Table 3: Studies contributing to the distribution of meningitis cases in India**

| Distribution of meningitis cases by etiology                                                                                                                                                                                                                                                                                                                                                                                                                                                                                                                                                                                                                                                                                                                                                                                                                                                                                                                                                                                                                                                                                                                                                                                                                                                                                                                                                                                                                                                                                                                                                                                                                                                                                                                                                                                                                                                                                                                                                                                                                                                                                                                                                                                                                                                                                                                                                                                                                                                                                                                                                                                                                                                                                                                                                                                                                                                                                                                                                                                                                                                                                                                                                                                                                                                                                                                                                                                                                                                                                                                                                                                                                                                                                                                                                                                                                                                                                                                                                                                                                                                                                                                                                                                                                                                                                                                                                                                                                                                                                                                                                                                                                                                                                                                                                                                                                                                                                                                                                                                                                                                                                                                                                                                                                                                                                                                                                                                                                                                                                                                                                                                                                                                                                                                                                                                                                                                                                                                                                                                                                                                                                                                                                                                                                                                                                                                                          |  |
|---------------------------------------------------------------------------------------------------------------------------------------------------------------------------------------------------------------------------------------------------------------------------------------------------------------------------------------------------------------------------------------------------------------------------------------------------------------------------------------------------------------------------------------------------------------------------------------------------------------------------------------------------------------------------------------------------------------------------------------------------------------------------------------------------------------------------------------------------------------------------------------------------------------------------------------------------------------------------------------------------------------------------------------------------------------------------------------------------------------------------------------------------------------------------------------------------------------------------------------------------------------------------------------------------------------------------------------------------------------------------------------------------------------------------------------------------------------------------------------------------------------------------------------------------------------------------------------------------------------------------------------------------------------------------------------------------------------------------------------------------------------------------------------------------------------------------------------------------------------------------------------------------------------------------------------------------------------------------------------------------------------------------------------------------------------------------------------------------------------------------------------------------------------------------------------------------------------------------------------------------------------------------------------------------------------------------------------------------------------------------------------------------------------------------------------------------------------------------------------------------------------------------------------------------------------------------------------------------------------------------------------------------------------------------------------------------------------------------------------------------------------------------------------------------------------------------------------------------------------------------------------------------------------------------------------------------------------------------------------------------------------------------------------------------------------------------------------------------------------------------------------------------------------------------------------------------------------------------------------------------------------------------------------------------------------------------------------------------------------------------------------------------------------------------------------------------------------------------------------------------------------------------------------------------------------------------------------------------------------------------------------------------------------------------------------------------------------------------------------------------------------------------------------------------------------------------------------------------------------------------------------------------------------------------------------------------------------------------------------------------------------------------------------------------------------------------------------------------------------------------------------------------------------------------------------------------------------------------------------------------------------------------------------------------------------------------------------------------------------------------------------------------------------------------------------------------------------------------------------------------------------------------------------------------------------------------------------------------------------------------------------------------------------------------------------------------------------------------------------------------------------------------------------------------------------------------------------------------------------------------------------------------------------------------------------------------------------------------------------------------------------------------------------------------------------------------------------------------------------------------------------------------------------------------------------------------------------------------------------------------------------------------------------------------------------------------------------------------------------------------------------------------------------------------------------------------------------------------------------------------------------------------------------------------------------------------------------------------------------------------------------------------------------------------------------------------------------------------------------------------------------------------------------------------------------------------------------------------------------------------------------------------------------------------------------------------------------------------------------------------------------------------------------------------------------------------------------------------------------------------------------------------------------------------------------------------------------------------------------------------------------------------------------------------------------------------------------------------------------------------------------|--|
| <b>Asia</b>                                                                                                                                                                                                                                                                                                                                                                                                                                                                                                                                                                                                                                                                                                                                                                                                                                                                                                                                                                                                                                                                                                                                                                                                                                                                                                                                                                                                                                                                                                                                                                                                                                                                                                                                                                                                                                                                                                                                                                                                                                                                                                                                                                                                                                                                                                                                                                                                                                                                                                                                                                                                                                                                                                                                                                                                                                                                                                                                                                                                                                                                                                                                                                                                                                                                                                                                                                                                                                                                                                                                                                                                                                                                                                                                                                                                                                                                                                                                                                                                                                                                                                                                                                                                                                                                                                                                                                                                                                                                                                                                                                                                                                                                                                                                                                                                                                                                                                                                                                                                                                                                                                                                                                                                                                                                                                                                                                                                                                                                                                                                                                                                                                                                                                                                                                                                                                                                                                                                                                                                                                                                                                                                                                                                                                                                                                                                                                           |  |
| <ul style="list-style-type: none"> <li>• Abanamy, A., et al. "Childhood bacterial meningitis in Riyadh." <i>Annals of Saudi Medicine</i> 11.6 (1991): 628-632.</li> <li>• Abomelha A. et al., "Childhood bacterial meningitis"</li> <li>• Al Khorasani, A., et al., "Bacterial profile and clinical outcome of childhood meningitis in rural Yemen: a 2-year hospital-based study." <i>Journal of Infection</i> 53.4 (2006): 228-234.</li> <li>• al-Jurayyan N. A., et al., "Childhood bacterial meningitis in Al-Baha province, Saudi Arabia"</li> <li>• Al-Mazrou, Y. Y., et al. "<i>Haemophilus type B</i> meningitis in Saudi children under 5 years old." <i>Journal of Tropical Pediatrics</i> 50.3 (2004): 131-136.</li> <li>• Almuneef, M., et al. "Childhood bacterial meningitis in Saudi Arabia." <i>Journal of Infection</i> 36.2 (1998): 157-160.</li> <li>• Ansari, I., et al. "Culture proven bacterial meningitis in children: agents, clinical profile and outcome." <i>Kathmandu University Medical Journal</i> 9.1 (2012): 36-40.</li> <li>• Azubuike J. C., et al., "Childhood bacterial meningitis in Tabuk, Saudi Arabia"</li> <li>• Batuwanthudawe, R., et al. "Incidence of childhood <i>Haemophilus influenzae</i> type b meningitis in Sri Lanka." <i>International Journal of Infectious Diseases</i> 14.5 (2010): e372-e376.</li> <li>• Batuwanthudawe, R., et al. "Surveillance of invasive pneumococcal disease in Colombo, Sri Lanka." <i>Clinical Infectious Diseases</i> 48.Supplement 2 (2009): S136-S140.</li> <li>• Ceyhan, M., "A Prospective Study of Etiology of Childhood Acute Bacterial Meningitis, Turkey-Volume 14, Number 7—July 2008-Emerging Infectious Disease journal-CDC." (2008).</li> <li>• Chinchankar, Nandita, et al. "Diagnosis and outcome of acute bacterial meningitis in early childhood." <i>Indian pediatrics</i> 39.10 (2002): 914-921.</li> <li>• Choo, K. E., et al. "Pyogenic meningitis in hospitalized children in Kelantan, Malaysia." <i>Annals of Tropical Paediatrics</i> 10.1 (1990): 89-98.</li> <li>• Dagan, R., et al. "Effectiveness of a nationwide infant immunization program against <i>Haemophilus influenzae</i> b." <i>Vaccine</i> 17.2 (1999): 134-141.</li> <li>• Fujii, R., et al. "Trends in childhood bacterial meningitis in Japan (1979-1984).(Part 1). On the causative organisms." <i>Kansenshōgaku zasshi. Journal of the Japanese Association for Infectious Diseases</i> 60.6 (1986): 592.</li> <li>• Gratten, M., et al. "The Bacteriology of Acute Pneumonia and Meningitis in Children in Papua New Guinea: Assumptions, Facts and Technical Strategies." <i>Papua New Guinea Medical Journal</i> 48.1/2 (2005): 73.</li> <li>• Gurley, E. S., et al. "Etiologies of bacterial meningitis in Bangladesh: results from a hospital-based study." <i>American Journal of Tropical Medicine and Hygiene</i> 81.3 (2009): 475-483.</li> <li>• Kim, Kyung-Hyo, et al. "The Causative Organisms of Bacterial Meningitis in Korean Children." <i>J Korean Med Sci</i> 13 (1998): 60-4.</li> <li>• Kim, S. A., et al. "An expanded age range for meningococcal meningitis: molecular diagnostic evidence from population-based surveillance in Asia." <i>BMC Infectious Diseases</i> 12.1 (2012): 310.</li> <li>• Lehmann, D., et al. "Aetiology and clinical signs of bacterial meningitis in children admitted to Goroka Base Hospital, Papua New Guinea, 1989–1992." <i>Annals of Tropical Paediatrics</i> 19.1 (1999): 21-32.</li> <li>• Liu, C. C., et al. "Bacterial meningitis in infants and children in southern Taiwan: emphasis on <i>Haemophilus influenzae</i> type B infection." <i>Journal of the Formosan Medical Association Taiwan</i> 92.10 (1993): 884-888.</li> <li>• Mahmood Y. A., et al., "Neonatal and childhood bacterial meningitis at Saddam general hospital in Tikrit." <i>Medical Journal of Tikrit University</i> (1997);3:39-45</li> <li>• Mahmoud, R., et al. "Pattern of meningitis in Al-Ain medical district, United Arab Emirates—a decadal experience (1990–99)." <i>Journal of Infection</i> 44.1 (2002): 22-25.</li> <li>• Mani, R., et al. "Bacteriological profile of community acquired acute bacterial meningitis: a ten-year retrospective study in a tertiary neurocare centre in South India." <i>Indian Journal of Medical Microbiology</i> 25.2 (2007): 108.</li> <li>• Mao, Fei-Fei, et al. "Aetiological spectrum and antibiotic susceptibility pattern of bacterial meningitis in infants and children in Hangzhou, China." <i>Acta Paediatrica</i> 94.8 (2005): 1162-1163.</li> <li>• Mendsaikhan, Jamsran, et al. "Childhood bacterial meningitis in Ulaanbaatar, Mongolia, 2002–2004." <i>Clinical Infectious Diseases</i> 48.Supplement 2 (2009): S141-S146.</li> <li>• Moisi, J. C., et al. "Enhanced diagnosis of pneumococcal meningitis with use of the Binax NOW immunochromatographic test of <i>Streptococcus pneumoniae</i> antigen: a multisite study." <i>Clinical Infectious Diseases</i> 48.Supplement 2 (2009): S49-S56.</li> <li>• Saha, S. K., et al. "The increasing burden of disease in Bangladeshi children due to <i>Haemophilus influenzae</i> type b meningitis." <i>Annals of Tropical Paediatrics</i> 17.1 (1997): 5-8.</li> <li>• Sakata, H., et al. "A study of bacterial meningitis in Hokkaido between 1994 and 1998." <i>Kansenshogaku zasshi. The Journal of the Japanese Association for Infectious Diseases</i> 74.4 (2000): 339-344.</li> <li>• Sung, R. Y. T., et al. "Meningitis in Hong Kong children, with special reference to the infrequency of haemophilus and meningococcal infection." <i>Journal of Paediatrics and Child Health</i> 33.4 (1997): 296-299.</li> <li>• Sutinen, J., et al. "Etiology of central nervous system infections in the Philippines and the role of serum C-reactive protein in excluding acute bacterial meningitis." <i>International Journal of Infectious Diseases</i> 3.2 (1999): 88-93.</li> <li>• Yang, Y., et al. "Acute bacterial meningitis in children in Hefei, China 1990-1992." <i>Chinese Medical Journal</i> 109.5 (1996): 385-388.</li> <li>• Zaidi, Anita KM, et al. "Surveillance of pneumococcal meningitis among children in Sindh, southern Pakistan." <i>Clinical Infectious Diseases</i> 48.Supplement 2 (2009): S129-S135.</li> </ul> |  |

### **Webappendix 3: Methods for estimating state-level, all-cause clinical and severe pneumonia cases**

We used methods that have been previously described elsewhere to estimate the incidence of community-based pneumonia and severe pneumonia in low- and middle-income countries.<sup>6</sup> We treated states in India as countries in this model. The detailed methods for all developing countries, including subnational estimates in India, are described below.

#### Step 1

A systematic literature review was conducted to identify published data on the incidence of pneumonia from community-based longitudinal studies. From the literature, an estimate of the proportion of pneumonia cases that are severe was also estimated. Only studies that met the minimum quality criteria we included. These were: (1) community-based surveillance of a defined population of children had to have been carried out for a minimum period of one year and in multiples of 12 months because clinical pneumonia has such a markedly seasonal nature; (2) the study had to use a strategy of active case detection—the surveillance interval had to be two weeks or shorter to minimize recall bias; and (3) case definitions had to be clearly defined and consistently applied.

#### Step 2

We conducted a systematic literature review to identify the risk factors for pneumonia in children aged 0-4 years. We selected risk factors which in meta- analyses had strong statistically significant associations with pneumonia. These were:

- Malnutrition (weight for age <-2SD): odds ratio (OR) 4.5 (2.1-9.5)
- Low birth weight (<2500g): OR 3.6 (0.8-16.3)
- Non-exclusive breastfeeding (4 months): OR 2.7 (1.7-4.4)
- Indoor air pollution: OR 1.6 (1.1-2.3)
- HIV: OR 6.51 (5.86-7.24)
- Crowding (more than 5 persons per household): OR 1.9 (1.5-2.5)
- Incomplete immunisation (no measles immunisation at 12 months): OR 1.8 (1.3-2.5)

#### Step 3

We obtained data on the prevalence of all risk factors other than HIV from representative household surveys with large sample sizes—the demographic and health surveys (DHS). DHS surveys are generally carried out every 2 to 5 years and provide data on demography and health indicators. The state-level prevalence data (other than HIV) in each state were obtained from the National Family Health Survey (NFHS). The HIV data were obtained from the United Nations Programme on HIV/AIDS (UNAIDS) estimates for 2013. For states in India, the prevalence of HIV in children was estimated using the proportion of children in each state with mothers infected with HIV and the UNAIDS estimate of the odds ratio for HIV infection in children born to mothers infected with HIV. We ensured that the definitions of risk factors were the same in the studies estimating the risk ratios as in the surveys that measured prevalence of exposure to these risk factors.

Specifically, we defined each risk factor using one or more DHS/NFHS variables. Then, using individual patient data from the standard DHS/NFHS survey (excluding special surveys) for each country or state at the survey version closest to 2000 and 2015 respectively, we calculated the proportion of participants with each combination of risk factors.

#### Step 4

Apart from HIV, all variables were contained within the DHS survey for India, and so the joint distributions were observed. For HIV, we corrected the DHS-derived estimates of HIV to match the UNAIDS survey estimates for India. First, we calculated the odds ratio for the difference in maternal HIV for each child to the childhood HIV prevalence estimates at the whole-India level. Next, we applied this odds ratio to the state-level data to estimate the prevalence with HIV for each combination of the other risk factors.

#### Step 5

The overall incidence (of clinical pneumonia in community) and hospitalization rate (for physician diagnosed pneumonia) for developing countries and Indian states were obtained from the Poisson regression models as described elsewhere.<sup>6</sup>

10,000 samples for each prediction were obtained. For the proportion of cases which were severe (i.e. with lower chest wall indrawing), the estimate from random effects meta-analysis (using Stata 11.1) was represented as a beta distribution, from which 10,000 samples were obtained using R. The incidence of severe pneumonia was calculated as the incidence of clinical pneumonia in the community times the proportion with severe pneumonia.

The overall incidence (of clinical and hospitalized pneumonia respectively) in a population is the sum of each stratum specific rate, weighted by the proportion in each stratum where there are  $j$  mutually exclusive strata:

$$Total\ rate = \frac{\sum x_j}{\sum n_j} = \sum_j \left( \frac{x_j}{n_j} \cdot \frac{n_0}{x_0} \cdot \frac{x_0}{n_0} \cdot \frac{n_j}{\sum n_j} \right)$$

where  $x$  is the number of cases in a stratum,  $n$  is the total population in a stratum and where  $j = 0$  indicates the stratum which has no exposures (i.e., the unexposed) and  $j = 1$  to  $j = 127$  indicate the strata for each unique combination of risk factors. This equation can be re-written as:

$$Total\ rate = \frac{x_0}{n_0} \times \sum_j \left( \frac{x_j}{n_j} \cdot \frac{n_0}{x_0} \cdot \frac{n_j}{\sum n_j} \right)$$

where  $\frac{x_0}{n_0}$  is the rate in the unexposed,  $\frac{x_j}{n_j} \cdot \frac{n_0}{x_0}$  is the rate ratio, and  $\frac{n_j}{\sum n_j}$  is the proportion in each stratum.

Therefore, using the regional estimates (for developing countries or Indian states) of the total rate, the combined rate ratio for each stratum, and the proportion in each stratum, we can calculate the incidence in unexposed people for the region (all developing countries and Indian states). If we then assume that the rate in the unexposed is consistent across the region, we can then calculate the incidence rate for each country or Indian state:

$$Country\ or\ Indian\ state\ specific\ rate = \frac{\sum x_j^c}{\sum n_j^c} = \frac{\sum x_j^s}{\sum n_j^s} \cdot \frac{\sum_j \left( \frac{x_j}{n_j} \cdot \frac{n_0}{x_0} \cdot \frac{n_j^r}{\sum n_j^r} \right)}{\sum_j \left( \frac{x_j}{n_j} \cdot \frac{n_0}{x_0} \cdot \frac{n_j^s}{\sum n_j^s} \right)}$$

where  $c$  indicates a country- or Indian state-specific value and  $r$  indicates a regional value.

## Step 6

### Assumptions

- As with attributable fraction calculations, we assume that the pooled risk ratios obtained from a range of case-control/cohort studies in the developing region were applicable across each developing country or Indian state. As described in Step 7 we added additional uncertainty to our estimates to relax this assumption somewhat. We assumed that odds ratios were the same as relative risks.
- As in our previous analysis for HIV and pneumonia, we assumed that there was an  $n$ -way interaction between each risk factor (i.e., 1.25-fold reduction) such that rate ratios combined sub-multiplicatively (e.g., for the group with malnutrition and low birth weight,  $RR_{malnutrition} = 4.5$ , and  $RR_{low\ birth\ weight} = 3.6$ ,  $RR_{both} = (4.5 \times 3.6) / 1.25 = 12.96$  rather than  $4.5 \times 3.6 = 16.2$ ; and for the group with malnutrition, low birth weight, and non-exclusive breastfeeding,  $RR_{non-exclusive\ breast\ feeding} = 2.7$ ,  $RR_{all\ three} = (4.5 \times 3.6 \times 2.7) / 1.25^2 = 27.99$  rather than  $4.5 \times 3.6 \times 2.7 = 43.74$ ). None of the primary studies included in the meta-analysis reported interaction/heterogeneity of effect measure estimates on a multiplicative scale. However, although we noted that the majority of studies did not report testing for interaction (presumably because of an actual or perceived lack of statistical power) it seemed unlikely to us that all risks combined fully multiplicatively.

Therefore, we added a weak interaction term to shrink the combined rate ratios towards the null. This would have the effect of causing the country specific estimates to be attenuated towards the overall estimate for the developing region.

- In order to calculate the uncertainty for the proportion of the population in each country or Indian state within each of the  $j$  strata, we sampled from a Dirichlet distribution, a multivariate extension of the beta distribution. Using this approach, we did not need to assume independence of risk factors.
- Finally, we assumed that the rate among the unexposed (i.e., the risk in the absence of these seven risk factors) came from the same distribution for all countries and Indian states. This is the same as assuming that there was no residual confounding.

#### Step 7

Using a simulation-based approach, we performed the calculation described in Step 5 to estimate the country- and Indian state-specific rates along with uncertainty estimates as uncertainty ranges (UR). This was done by performing this calculation for each of the 10,000 samples from the distributions representing the incidence rates, disease severity proportion, odds ratios and risk factor proportions (methods used to obtain each of these were obtained as described above) within R. Full analysis code and data are available from the authors on request.

#### Step 7

In a similar manner to equation 3 within step 5, we calculated the incidence of pneumonia in HIV-uninfected children by summing those strata where children were HIV negative regardless of the presence/absence of other risk factors. Similarly, we calculated the incidence of pneumonia in HIV-infected children.

#### Step 8

Having obtained estimates of the total rate and rate in HIV-uninfected children in each country or Indian state, we used the standard formula for attributable fraction:

$$\text{Attributable fraction} = \frac{I_e - I_0}{I_e}$$

Or, equivalently:

$$\text{Attributable fraction} = \frac{RR - 1}{RR}$$

where  $I_e$  is the incidence in HIV-infected and  $I_0$  is the incidence in HIV-uninfected in each country or Indian state; and  $RR$  is the risk ratio for pneumonia in HIV-infected (compared to HIV-uninfected). We then applied the attributable fraction to the rate among the HIV-infected (and the UR) in order to obtain the rate attributable to HIV with the UR. As we had already incorporated uncertainty in the HIV risk factor estimates in calculating the total country rates, we did not add additional uncertainty at this stage.

## Webappendix 4: Summary estimates for pathogen-specific pneumonia morbidity and mortality

### 4.1: Probe approach

We used the probe approach to estimate the proportion of pneumonia cases and deaths attributable to pneumococcus.<sup>3,7</sup> We first identified efficacy values from PCV and Hib vaccine randomized control trials (RCT) and effectiveness results from case-control studies with random or systematic allocation of vaccine. We used data from trials and studies that used case definitions that aligned closely with WHO pneumonia case definitions.<sup>8-10</sup> Since vaccine trials and studies did not assess efficacy against pneumonia mortality, we used values of efficacy and effectiveness against radiography-confirmed, primary end-point pneumonia (i.e., consolidation),<sup>10</sup> with relevant adjustments, as a proxy for the proportion of pneumonia deaths caused by each pathogen. Arithmetically inherent in using this proxy is that the pneumococcal pneumonia case fatality ratio (CFR) is equivalent to the Hib pneumonia CFR, and they are both equal to the CFR for non-pneumococcal, non-Hib pneumonia cases. The direction of the bias introduced by using this proxy has been described previously—it most likely underestimates pneumococcal and Hib deaths in high-mortality settings and may overestimate deaths in low-mortality settings.<sup>3</sup> We used values of PCV and Hib vaccine efficacy and effectiveness against WHO-defined clinical and severe pneumonia<sup>8,9</sup> to estimate the proportions of clinical and severe pneumonia cases associated with each pathogen.

### 4.2: Adjustments

PCV and Hib vaccine efficacy and effectiveness values were adjusted to account for imperfect efficacy against vaccine-type (VT) pneumococcal pneumonia. Since true efficacy values for these parameters are not known, we used as a proxy the observed efficacy against VT invasive pneumococcal disease (IPD) on a trial-by-trial basis. We estimated the degree of bias introduced by this proxy measure for pneumococcus using two sensitivity analyses described previously.<sup>3</sup> PCV efficacy values were also adjusted to account for the proportion of pneumonia that was VT in the control group. As this value is not available, we used as a proxy the proportion of IPD cases that were VT from the control group. For pneumococcus, PCV efficacy values were also adjusted to account for the proportion of pneumonia cases caused by Hib, since all PCV trials were conducted in the context of Hib vaccine use. Below are the formulas for calculating the proportion of deaths and cases due to pneumococcus and Hib:

$$\% \text{ Pneumonia cases}_{Spn} = \frac{VE_{Pneumonia,PCV}}{[(VE_{IPD,PCV}) \times (VT_{Control}) \times (1 - \% \text{ Pneumonia cases}_{Hib})]}$$

$$\% \text{ Pneumonia cases}_{Hib} = \frac{VE_{Pneumonia,Hib}}{[VE_{IHD,Hib}]}$$

Where  $VE$  is PCV or Hib vaccine efficacy against a pneumonia or invasive disease,  $IPD$  is invasive pneumococcal disease,  $IHD$  is invasive Hib disease,  $VT_{Control}$  is the proportion of pneumococcal disease caused by vaccine serotypes in the control group of the RCT.

### Summary Estimates

Adjusted PCV and Hib vaccine efficacy and effectiveness estimates were each combined in a random effects meta-analysis to determine the pathogen-specific fraction of pneumonia cases for each pneumonia case definition (i.e., clinical, severe and radiography-confirmed pneumonia). We used the delta method to calculate standard errors for each trial. Random effects meta-analyses were used throughout the pathogen-specific pneumonia modeling because fixed effects models do not incorporate between study variability. In addition, fixed effects models produce biased results in most cases.<sup>11</sup> The value of random effects meta-analysis methods has been called into question. However, we determined that this was the most appropriate way to combine information from different studies into a single input parameter value with associated uncertainty.

### Uncertainty

The primary sources of uncertainty in the pneumonia models were the between-study variation in vaccine efficacy estimates. For pneumococcal pneumonia, the Gambia trial<sup>12</sup> significantly pushes the meta-analysis upward. In contrast, the Lombok trial<sup>13</sup> pulls the overall estimate toward the null for Hib pneumonia. As we assume all Hib pneumonia deaths occur only in children less than two years, the upper limit uncertainty bounds, reflect the possibility that there may be deaths in older children. Because of this between-study variation, we chose to use a

jackknife, leave-one-study-out approach for the upper and lower bounds of the pneumococcal and Hib pneumonia fractions. A limitation of using the jackknife method with small sample sizes is that standard errors are not reliable, which is why we chose to use the upper and lower bounds for estimating uncertainty. The uncertainty bounds account for both sampling and non-sampling error. Assessing non-sampling error has been a limitation of disease burden models. This approach underscores the uncertainty arising from limited sample sizes, population variability, and the paucity of data that is usually available to estimate disease burden. We were unable to account these sources of uncertainty as these values (e.g., vaccine coverage, population estimates) were not available. Nevertheless, excluding all sources of model uncertainty leads to uncertainty ranges that are narrower than the true uncertainty.

**Figure 4: Proportion of radiography-confirmed pneumonia attributable to pneumococcus**

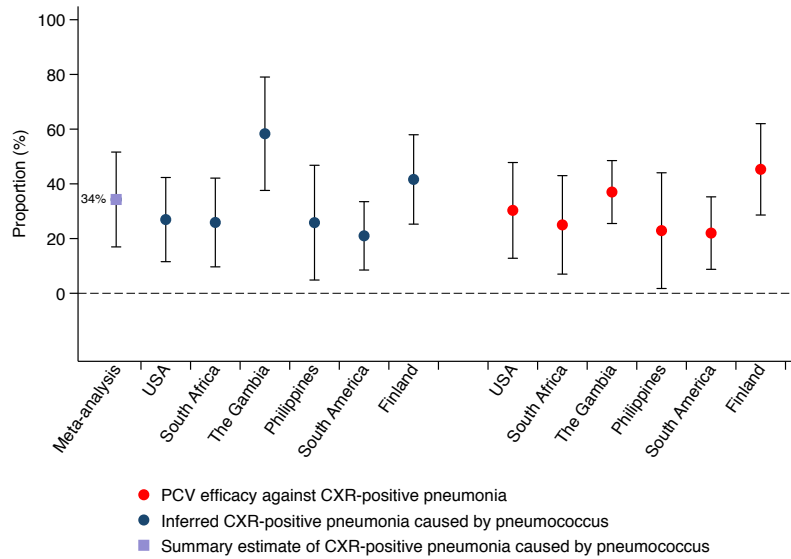

**Figure 5: Proportion of severe pneumonia attributable to pneumococcus**

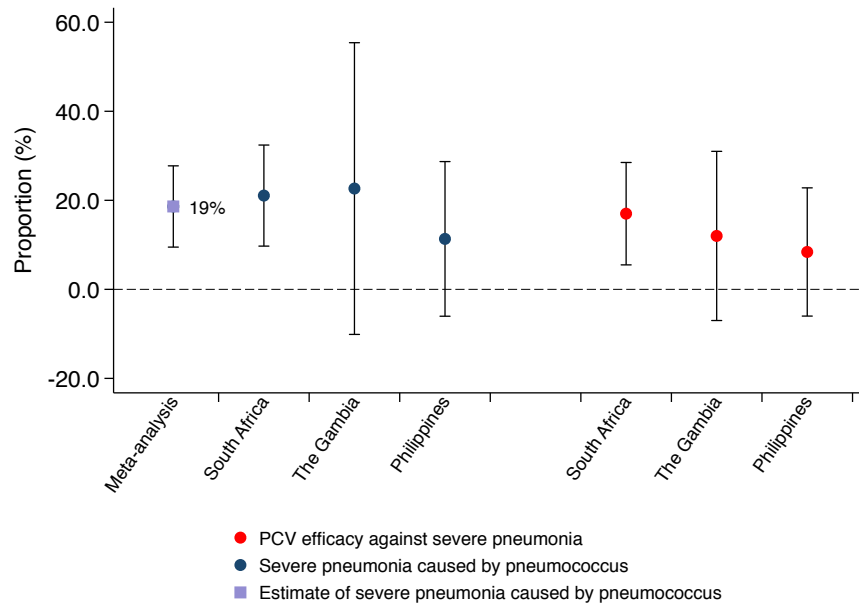

**Figure 6: Proportion of clinical pneumonia attributable to pneumococcus**

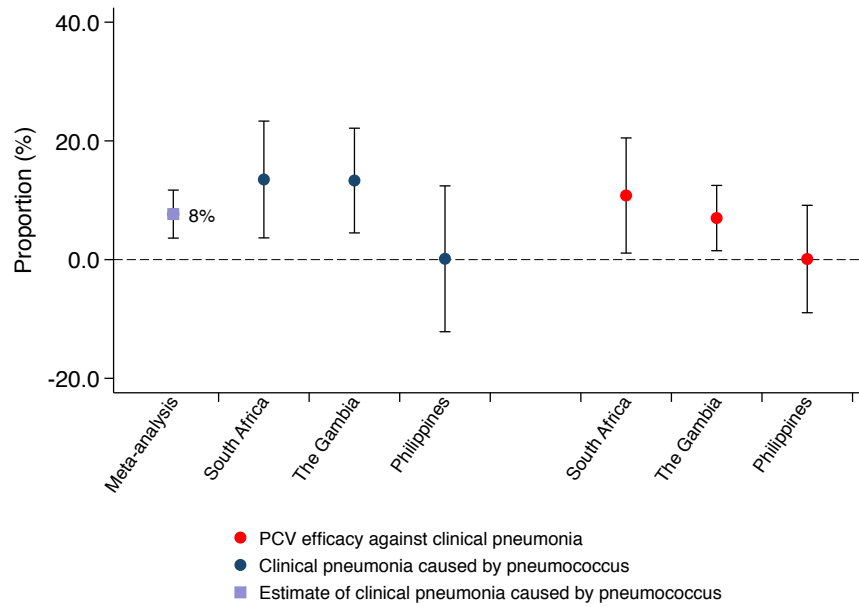

**Figure 7: Proportion of radiography-confirmed pneumonia attributable to Hib**

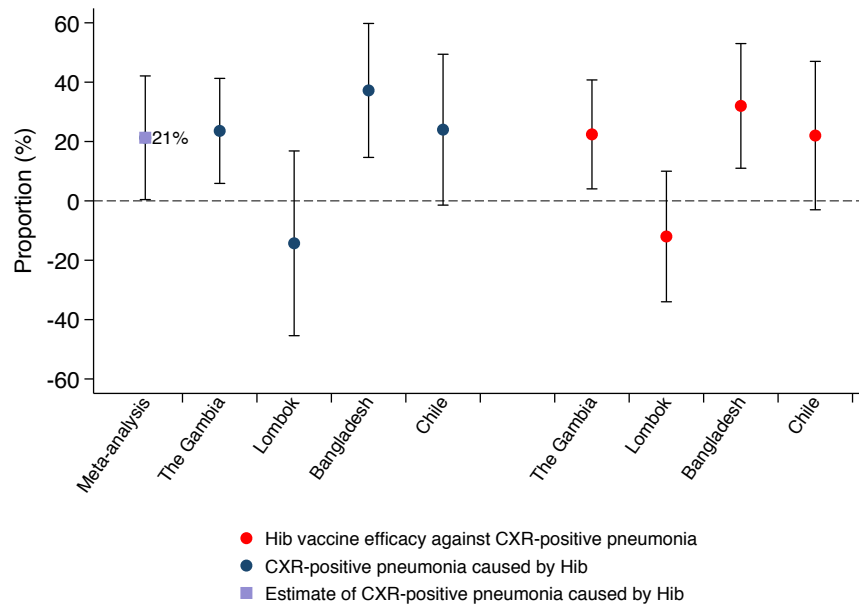



**Figure 8: Proportion of severe pneumonia attributable to Hib**

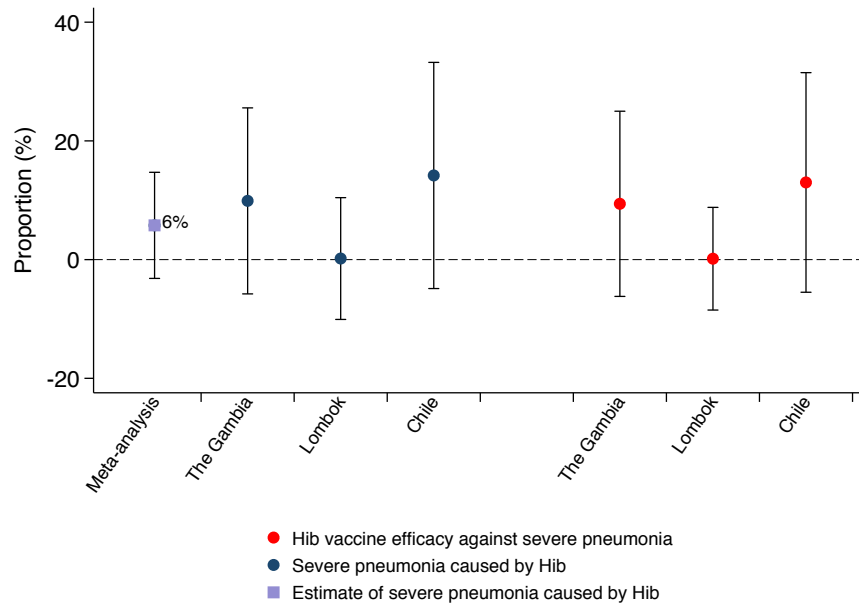

**Figure 9: Proportion of clinical pneumonia attributable to Hib**

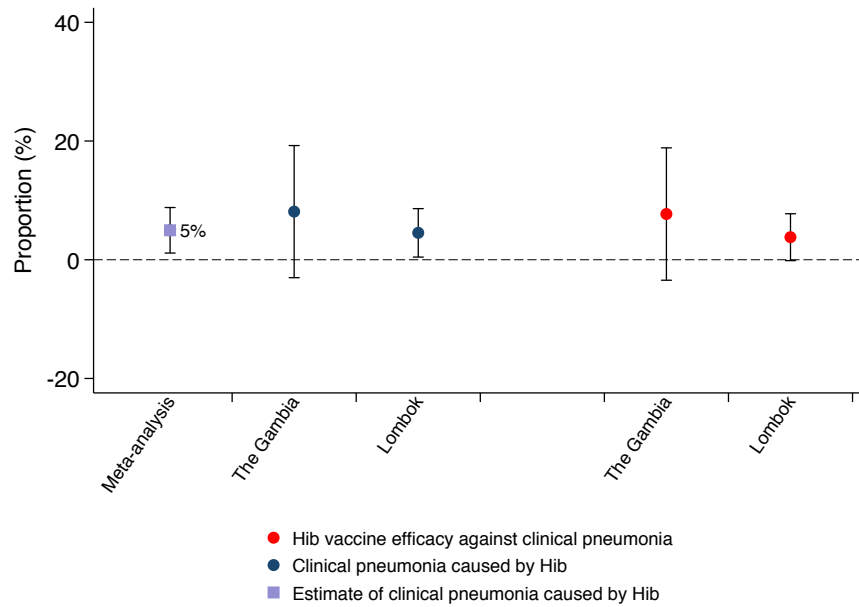

## Webappendix 5: Estimates of pathogen-specific meningitis morbidity and mortality.

We used data from studies reporting on the distribution of meningitis cases and adjusted these estimates by the relative pathogen-specific meningitis CFR to calculate the proportion of meningitis deaths due to pneumococcus and Hib. We constrained the total contribution of the most common causes of bacterial meningitis (i.e., pneumococcus, Hib, and *Neisseria meningitidis*) to all-cause meningitis cases and deaths to 83%, based on an analysis of studies reporting on multiple meningitis etiologies using diagnostic techniques with equivalent sensitivity for all pathogens. To derive the proportion of all-cause meningitis deaths attributable to each pathogen, we used the following equation.

$$\% \text{ Meningitis deaths}_x = \frac{\text{Meningitis CFR}_x \times \% \text{ Meningitis cases}_x}{\sum_i (\text{Meningitis CFR}_i \times \% \text{ Meningitis cases}_i)}$$

where *Meningitis CFR<sub>x</sub>* is the case fatality ratio (CFR) for pathogen *x*, *% Meningitis cases<sub>x</sub>* is the proportion of meningitis cases attributable to pathogen *x*, and the denominator on the right-hand side of the equation is the sum of the products for each pathogen (i.e., *i* ranges over each of the three pathogens of interest—pneumococcus, Hib, and *Neisseria meningitidis*).

The proportion of meningitis cases attributable to pneumococcus and Hib in the equation above was determined by using data from observational studies identified from the literature rather than the vaccine probe approach was used for estimating pathogen-specific pneumonia cases and deaths. The basis for this decision was that the etiologic diagnostic yield from investigations of meningitis cases is high when conducted with appropriate clinical and microbiologic methods, unlike pneumonia. We included only surveillance studies lasting more than 12 months and conducted in the absence of conjugate vaccine. Data from studies reporting on etiologically-confirmed bacterial meningitis cases attributable to the most common causes of bacterial meningitis (i.e., pneumococcus, Hib, and *Neisseria meningitidis*) were combined in random effects meta-analyses to develop region-specific summary estimates of the relative distribution of meningitis cases by these pathogens.

We estimated pathogen-specific meningitis CFR by random effects meta-analyses of data from the systematic literature review, stratified by child mortality setting: low (<30 deaths per 1,000 live births), medium (30-<75), high (75-<150), and very high (≥150). Because reported CFR values reflect mortality in children who access care at a study site or health facility, we adjusted them to account for the higher CFR (i.e., 90% for all pathogens) assumed for those not accessing care. There is no measure of care seeking for children with meningitis in standardized surveys from India; therefore, we used state-specific values for the proportion of children seeking care for pneumonia symptoms from National Family and Household Survey (NFHS) as a proxy. We assumed 100% access to care in states with child mortality below 30 deaths per 1,000 live births.

## **Webappendix 6: Methods used to estimate pathogen-specific non-pneumonia, non-meningitis (NPNM) cases and deaths**

We estimated pathogen-specific morbidity due to other invasive syndromes (e.g., sepsis) from studies reporting on the ratio of pathogen-specific NPNM cases to pathogen-specific meningitis cases. These estimates were combined using random effects meta-analyses, stratifying the data first by child mortality setting. For pneumococcus, we stratified NPNM cases by severe and non-severe cases. NPNM deaths were estimated by multiplying country-specific NPNM cases (severe cases for pneumococcus) by country-specific NPNM CFR. The latter was derived by estimating a mortality setting-specific ratio of pathogen-specific NPNM CFR and pathogen-specific meningitis CFR, and applying that to the country-specific pneumococcal meningitis CFR.

There are very few studies globally reporting on NPNM CFR (5 each for pneumococcus and Hib) and only two of these studies for pneumococcus were conducted in epidemiologically relevant settings. Because of the paucity of data for pathogen-specific NPNM from relevant settings, we chose to use the ratio from other settings and then anchor our state-specific pathogen NPNM CFR estimates on the state-specific pathogen meningitis CFR estimates. Because we chose to anchor our pathogen NPNM estimates on the pathogen meningitis estimates, we used the pathogen meningitis uncertainty as the primary source of uncertainty in our estimates.

**Webappendix 7: Equation used to account for increased risk of Hib and pneumococcal disease in children infected with HIV**

We used the following equation to prepare annual mortality and morbidity estimates due to each syndrome (i.e., pneumonia, meningitis, and NPNM) in HIV-infected children for each pathogen:

$$HIV^+ deaths_{pathogen,syndrome} = \frac{HIV \% \times Population_{1-59 mos.} \times HIV^- deaths_{pathogen,syndrome} \times ID Relative Risk_{pathogen}}{(1 - HIV \%) \times Population_{1-59 mos.}}$$

Where *HIV %* represents the proportion of children infected with HIV and not on HAART, *Population<sub>1-59 mos.</sub>* is the total population of children 1-59 months in a state, *HIV<sup>-</sup> deaths<sub>pathogen,syndrome</sub>* is the estimated number of deaths due to the pathogen by syndrome, and *ID Relative Risk<sub>pathogen</sub>* is the relative risk of invasive disease for pneumococcus (40.96) or Hib (7.39) in children infected with HIV.

**Webappendix 8: Comparison with previously published India subnational pneumococcal pneumonia estimates**

**Table 4: Comparison of pneumococcal pneumonia deaths in 2010 comparing estimates Farooqui, et al. and current study**

| State or UT       | Farooqui, et al.              |      | Current study                 |      | Absolute difference |
|-------------------|-------------------------------|------|-------------------------------|------|---------------------|
|                   | Pneumococcal Pneumonia Deaths | Rank | Pneumococcal Pneumonia Deaths | Rank |                     |
| A&N Islands       |                               |      | <100                          | 33   | -                   |
| Andhra Pradesh    | 934                           | 13   | 1,700                         | 12   | 766                 |
| Arunachal Pradesh | 0                             | 20   | <100                          | 26   | 70                  |
| Assam             | 2,200                         | 9    | 3,500                         | 5    | 1,300               |
| Bihar             | 23,200                        | 2    | 9,800                         | 2    | 13,400              |
| Chandigarh        |                               |      | <100                          | 29   | -                   |
| Chhattisgarh      | 2,100                         | 10   | 1,700                         | 13   | 400                 |
| D&N Haveli        |                               |      | <100                          | 31   | -                   |
| Daman & Diu       |                               |      | <100                          | 34   | -                   |
| Delhi             | 200                           | 18   | 430                           | 20   | 230                 |
| Goa               | 0                             | 20   | <100                          | 32   | 10                  |
| Gujarat           | 2,600                         | 8    | 2,900                         | 7    | 300                 |
| Haryana           | 1,400                         | 12   | 1,400                         | 14   | 0                   |
| Himachal Pradesh  | 200                           | 18   | 230                           | 23   | 30                  |
| J & K             | 600                           | 16   | 320                           | 21   | 280                 |
| Jharkhand         | 6,300                         | 5    | 1,800                         | 11   | 4,500               |
| Karnataka         | 1,400                         | 12   | 2,400                         | 9    | 1,000               |
| Kerala            | 0                             | 20   | 290                           | 22   | 290                 |
| Lakshadweep       |                               |      | <100                          | 35   | -                   |
| Madhya Pradesh    | 13,400                        | 3    | 8,100                         | 3    | 5,300               |
| Maharashtra       | 2,000                         | 11   | 2,300                         | 10   | 300                 |
| Manipur           | 100                           | 19   | <100                          | 28   | 40                  |
| Meghalaya         | 100                           | 19   | 540                           | 18   | 440                 |
| Mizoram           | 0                             | 20   | 110                           | 25   | 110                 |
| Nagaland          | 100                           | 19   | 120                           | 24   | 20                  |
| Odisha            | 3,400                         | 6    | 3,100                         | 6    | 300                 |
| Puducherry        |                               |      | <100                          | 30   | -                   |
| Punjab            | 600                           | 16   | 800                           | 17   | 200                 |
| Rajasthan         | 11,900                        | 4    | 5,700                         | 4    | 6,200               |
| Sikkim            | 0                             | 20   | <100                          | 31   | 10                  |
| Tamil Nadu        | 300                           | 17   | 1,300                         | 15   | 1,000               |
| Telangana         | 666                           | 15   | 1,240                         | 16   | 574                 |
| Tripura           | 100                           | 19   | <100                          | 27   | 30                  |
| Uttar Pradesh     | 27,800                        | 1    | 21,500                        | 1    | 6,300               |
| Uttarakhand       | 900                           | 14   | 470                           | 19   | 430                 |
| West Bengal       | 2,900                         | 7    | 2,400                         | 8    | 500                 |

Farooqui, et al. estimated the proportion of severe pneumonia cases caused by pneumococcus using the efficacy of PCV against radiograph-confirmed pneumonia, rather than efficacy against severe pneumonia, from a vaccine trial conducted in the Philippines.<sup>14</sup> The values used to adjust the pneumonia vaccine efficacy value from the Philippines trial for serotype coverage and incomplete vaccine efficacy were from an IPD surveillance study conducted in India<sup>15</sup> and a vaccine clinical trial in South Africa,<sup>16</sup> respectively, rather than applicable data from the Philippines trial. Hib vaccine use was not accounted for. Farooqui, et al. applied this estimate to state-level severe all-cause pneumonia estimates. To derive pneumococcal pneumonia deaths, Farooqui, et al. applied a summary estimate of pneumococcal pneumonia case fatality (16.7%) from two observational studies in India<sup>17,18</sup> to severe pneumococcal pneumonia case estimates. Pathogen-specific pneumonia case fatality is often overestimated, as pathogen isolation is more likely in the most severe cases.

## References

1. Wolfson L, O'Brien K, Watt J, et al. Methods to estimate the global burden of disease due to Haemophilus influenzae type b and Streptococcus pneumoniae in children less than 5 years of age. *Lancet Web annex* 2009;893-902.
2. Knoll M, O'Brien K, Henkle E, et al. Global literature review of Haemophilus influenzae type b and Streptococcus pneumoniae invasive disease among children less than five years of age, 1980–2005. *Geneva, Switzerland: World Health Organization* 2009
3. Wahl B, O'Brien KL, Greenbaum A, et al. Burden of Streptococcus pneumoniae and Haemophilus influenzae type b disease in children in the era of conjugate vaccines: global, regional, and national estimates for 2000-15. *Lancet Glob Health* 2018;6(7):e744-e57. doi: 10.1016/S2214-109X(18)30247-X [published Online First: 2018/06/16]
4. O'Brien KL, Wolfson LJ, Watt JP, et al. Burden of disease caused by Streptococcus pneumoniae in children younger than 5 years: global estimates. *Lancet* 2009;374(9693):893-902. doi: 10.1016/S0140-6736(09)61204-6
5. Watt JP, Wolfson LJ, O'Brien KL, et al. Burden of disease caused by Haemophilus influenzae type b in children younger than 5 years: global estimates. *Lancet* 2009;374(9693):903-11. doi: 10.1016/S0140-6736(09)61203-4
6. McAllister DA, Liu L, Shi T, et al. Global, regional, and national estimates of pneumonia morbidity and mortality in children younger than 5 years between 2000 and 2015: a systematic analysis. *The Lancet Global Health* 2018 doi: 10.1016/S2214-109X(18)30408-X
7. Mulholland EK. Use of vaccine trials to estimate burden of disease. *J Health Popul Nutr* 2004;22(3):257-67.
8. World Health Organization. Programme for the control of acute respiratory infections: technical bases for the WHO recommendations on the management of pneumonia in children at first level health facilities. 1991
9. World Health Organization. Handbook IMCI: Integrated management of childhood illness. Geneva 2005.
10. Cherian T, Mulholland EK, Carlin JB, et al. Standardized interpretation of paediatric chest radiographs for the diagnosis of pneumonia in epidemiological studies. *Bulletin of the World Health Organization* 2005;83(5):353-9. doi: /S0042-96862005000500011
11. Schmidt FL, Oh IS, Hayes TL. Fixed- versus random-effects models in meta-analysis: model properties and an empirical comparison of differences in results. *The British journal of mathematical and statistical psychology* 2009;62(Pt 1):97-128. doi: 10.1348/000711007x255327 [published Online First: 2007/11/16]
12. Cutts FT, Zaman SM, Enwere G, et al. Efficacy of nine-valent pneumococcal conjugate vaccine against pneumonia and invasive pneumococcal disease in The Gambia: randomised, double-blind, placebo-controlled trial. *Lancet* 2005;365(9465):1139-46. doi: 10.1016/S0140-6736(05)71876-6
13. Gessner BD, Sutanto A, Linehan M, et al. Incidences of vaccine-preventable Haemophilus influenzae type b pneumonia and meningitis in Indonesian children: hamlet-randomised vaccine-probe trial. *Lancet* 2005;365(9453):43-52.
14. Lucero MG, Nohynek H, Williams G, et al. Efficacy of an 11-valent pneumococcal conjugate vaccine against radiologically confirmed pneumonia among children less than 2 years of age in the Philippines: a randomized, double-blind, placebo-controlled trial. *Pediatr Infect Dis J* 2009;28(6):455-62. doi: 10.1097/INF.0b013e31819637af
15. Manoharan A, Manchanda V, Balasubramanian S, et al. Invasive pneumococcal disease in children aged younger than 5 years in India: a surveillance study. *The Lancet Infectious diseases* 2017;17(3):305-12. doi: 10.1016/S1473-3099(16)30466-2
16. Klugman KP, Madhi SA, Huebner RE, et al. A trial of a 9-valent pneumococcal conjugate vaccine in children with and those without HIV infection. *The New England journal of medicine* 2003;349(14):1341-8. doi: 10.1056/NEJMoa035060
17. Gupta M, Kumar R, Deb AK, et al. Multi-center surveillance for pneumonia & meningitis among children (<2 yr) for Hib vaccine probe trial preparation in India. *Indian J Med Res* 2010;131:649-58.
18. Prospective multicentre hospital surveillance of Streptococcus pneumoniae disease in India. Invasive Bacterial Infection Surveillance (IBIS) Group, International Clinical Epidemiology Network (INCLIN). *Lancet* 1999;353(9160):1216-21.

Webappendix 9: Pneumococcal deaths in India by state, year, and HIV status

| Year | State             | Pneumonia Deaths          |                                |                                   |                                        | Meningitis deaths          |                                 |                                    |                                         | NPNM deaths          |                           |                              |                                   |
|------|-------------------|---------------------------|--------------------------------|-----------------------------------|----------------------------------------|----------------------------|---------------------------------|------------------------------------|-----------------------------------------|----------------------|---------------------------|------------------------------|-----------------------------------|
|      |                   | Spn pneumonia deaths (UR) | Spn pneumonia deaths; HIV (UR) | Spn pneumonia mortality rate (UR) | Spn pneumonia mortality rate; HIV (UR) | Spn meningitis deaths (UR) | Spn meningitis deaths; HIV (UR) | Spn meningitis mortality rate (UR) | Spn meningitis mortality rate; HIV (UR) | Spn NPNM deaths (UR) | Spn NPNM deaths; HIV (UR) | Spn NPNM mortality rate (UR) | Spn NPNM mortality rate; HIV (UR) |
| 2000 | Andhra Pradesh    | 5619 (9984-5856)          |                                | 73 (52-76)                        |                                        | 884 (455-1616)             |                                 | 12 (6-21)                          |                                         | 278 (143-508)        |                           | 4 (2-7)                      |                                   |
| 2001 | Andhra Pradesh    | 5471 (3880-5702)          |                                | 71 (51-74)                        |                                        | 858 (405-1613)             |                                 | 11 (5-21)                          |                                         | 764 (360-1436)       |                           | 10 (5-19)                    |                                   |
| 2002 | Andhra Pradesh    | 5286 (3748-5508)          |                                | 69 (49-72)                        |                                        | 827 (391-1558)             |                                 | 11 (5-20)                          |                                         | 736 (348-1387)       |                           | 10 (5-18)                    |                                   |
| 2003 | Andhra Pradesh    | 5066 (3592-5279)          |                                | 67 (47-70)                        |                                        | 791 (375-1494)             |                                 | 10 (5-20)                          |                                         | 705 (334-1330)       |                           | 9 (4-18)                     |                                   |
| 2004 | Andhra Pradesh    | 4816 (3415-5019)          |                                | 64 (45-67)                        |                                        | 751 (356-1420)             |                                 | 10 (5-19)                          |                                         | 669 (317-1264)       |                           | 9 (4-17)                     |                                   |
| 2005 | Andhra Pradesh    | 4550 (3227-4742)          |                                | 61 (43-64)                        |                                        | 709 (336-1343)             |                                 | 10 (4-18)                          |                                         | 639 (299-1195)       |                           | 8 (4-16)                     |                                   |
| 2006 | Andhra Pradesh    | 4280 (3035-4460)          |                                | 58 (41-60)                        |                                        | 667 (315-1263)             |                                 | 9 (4-17)                           |                                         | 593 (280-1125)       |                           | 8 (4-15)                     |                                   |
| 2007 | Andhra Pradesh    | 3991 (2830-4159)          |                                | 54 (38-57)                        |                                        | 620 (292-1179)             |                                 | 8 (4-16)                           |                                         | 552 (260-1049)       |                           | 8 (4-14)                     |                                   |
| 2008 | Andhra Pradesh    | 3701 (2624-3857)          |                                | 51 (36-53)                        |                                        | 573 (271-1093)             |                                 | 8 (4-15)                           |                                         | 510 (241-973)        |                           | 7 (3-13)                     |                                   |
| 2009 | Andhra Pradesh    | 3391 (2405-3534)          |                                | 47 (33-49)                        |                                        | 523 (241-1008)             |                                 | 7 (3-14)                           |                                         | 465 (215-897)        |                           | 6 (3-12)                     |                                   |
| 2010 | Andhra Pradesh    | 3074 (2180-3203)          |                                | 43 (31-45)                        |                                        | 471 (212-918)              |                                 | 7 (3-13)                           |                                         | 419 (189-817)        |                           | 6 (3-12)                     |                                   |
| 2011 | Andhra Pradesh    | 2763 (1959-2879)          |                                | 39 (28-41)                        |                                        | 421 (185-830)              |                                 | 6 (3-12)                           |                                         | 375 (165-739)        |                           | 5 (2-11)                     |                                   |
| 2012 | Andhra Pradesh    | 2440 (1730-2542)          |                                | 35 (25-37)                        |                                        | 370 (159-736)              |                                 | 5 (2-11)                           |                                         | 330 (141-656)        |                           | 5 (2-10)                     |                                   |
| 2013 | Andhra Pradesh    | 2177 (1544-2269)          |                                | 32 (23-34)                        |                                        | 330 (142-657)              |                                 | 5 (2-10)                           |                                         | 294 (126-585)        |                           | 4 (2-9)                      |                                   |
| 2014 | Andhra Pradesh    | 1954 (1385-2036)          |                                | 29 (21-31)                        |                                        | 296 (127-590)              |                                 | 4 (2-9)                            |                                         | 263 (113-525)        |                           | 4 (2-8)                      |                                   |
| 2015 | Andhra Pradesh    | 1818 (1289-1894)          | 25 (18-27)                     | 28 (20-29)                        | 0 (0-0)                                | 275 (118-549)              | 4 (2-8)                         | 4 (2-8)                            | 0 (0-0)                                 | 245 (105-489)        | 4 (2-7)                   | 4 (2-7)                      |                                   |
| 2000 | Arunachal Pradesh | 78 (55-81)                |                                | 50 (35-52)                        |                                        | 11 (4-25)                  |                                 | 7 (3-16)                           |                                         | 10 (4-22)            |                           | 6 (2-14)                     |                                   |
| 2001 | Arunachal Pradesh | 73 (52-76)                |                                | 46 (33-48)                        |                                        | 11 (4-23)                  |                                 | 7 (2-15)                           |                                         | 9 (3-21)             |                           | 6 (2-13)                     |                                   |
| 2002 | Arunachal Pradesh | 73 (52-76)                |                                | 46 (33-48)                        |                                        | 10 (4-23)                  |                                 | 7 (2-14)                           |                                         | 9 (3-20)             |                           | 6 (2-13)                     |                                   |
| 2003 | Arunachal Pradesh | 74 (52-77)                |                                | 46 (33-48)                        |                                        | 11 (4-23)                  |                                 | 7 (2-15)                           |                                         | 9 (3-21)             |                           | 6 (2-13)                     |                                   |
| 2004 | Arunachal Pradesh | 73 (52-76)                |                                | 46 (33-48)                        |                                        | 11 (4-23)                  |                                 | 7 (2-14)                           |                                         | 10 (3-21)            |                           | 6 (2-13)                     |                                   |
| 2005 | Arunachal Pradesh | 72 (51-75)                |                                | 45 (32-47)                        |                                        | 11 (4-22)                  |                                 | 7 (3-14)                           |                                         | 9 (4-20)             |                           | 6 (2-12)                     |                                   |
| 2006 | Arunachal Pradesh | 75 (53-78)                |                                | 47 (33-49)                        |                                        | 11 (5-23)                  |                                 | 7 (3-14)                           |                                         | 10 (4-20)            |                           | 6 (3-13)                     |                                   |
| 2007 | Arunachal Pradesh | 71 (51-74)                |                                | 44 (31-46)                        |                                        | 11 (5-21)                  |                                 | 7 (3-13)                           |                                         | 10 (5-19)            |                           | 6 (3-12)                     |                                   |
| 2008 | Arunachal Pradesh | 72 (51-75)                |                                | 45 (32-47)                        |                                        | 11 (5-21)                  |                                 | 7 (3-13)                           |                                         | 10 (5-19)            |                           | 6 (3-12)                     |                                   |
| 2009 | Arunachal Pradesh | 72 (51-75)                |                                | 45 (32-47)                        |                                        | 11 (5-22)                  |                                 | 7 (3-14)                           |                                         | 10 (4-19)            |                           | 6 (3-12)                     |                                   |
| 2010 | Arunachal Pradesh | 72 (51-75)                |                                | 45 (32-47)                        |                                        | 11 (4-22)                  |                                 | 7 (3-14)                           |                                         | 9 (4-20)             |                           | 6 (2-12)                     |                                   |
| 2011 | Arunachal Pradesh | 69 (49-72)                |                                | 43 (31-45)                        |                                        | 10 (4-22)                  |                                 | 6 (2-14)                           |                                         | 9 (3-19)             |                           | 6 (2-12)                     |                                   |
| 2012 | Arunachal Pradesh | 66 (47-69)                |                                | 42 (30-44)                        |                                        | 10 (3-21)                  |                                 | 6 (2-13)                           |                                         | 9 (3-19)             |                           | 5 (2-12)                     |                                   |
| 2013 | Arunachal Pradesh | 64 (45-66)                |                                | 41 (29-42)                        |                                        | 9 (3-20)                   |                                 | 6 (2-13)                           |                                         | 8 (3-18)             |                           | 5 (2-11)                     |                                   |
| 2014 | Arunachal Pradesh | 61 (43-63)                |                                | 39 (28-41)                        |                                        | 9 (3-19)                   |                                 | 6 (2-12)                           |                                         | 8 (3-17)             |                           | 5 (2-11)                     |                                   |
| 2015 | Arunachal Pradesh | 57 (40-59)                | 1 (1-1)                        | 37 (25-38)                        | 1 (0-1)                                | 8 (3-18)                   | 0 (0-0)                         | 5 (2-12)                           | 0 (0-0)                                 | 7 (3-16)             | 0 (0-0)                   | 5 (2-10)                     |                                   |
| 2000 | Assam             | 4199 (2977-4376)          |                                | 122 (87-127)                      |                                        | 620 (284-1274)             |                                 | 18 (8-37)                          |                                         | 195 (83-400)         |                           | 8 (2-12)                     |                                   |
| 2001 | Assam             | 4056 (2876-4227)          |                                | 117 (83-122)                      |                                        | 599 (255-1230)             |                                 | 17 (7-35)                          |                                         | 188 (80-387)         |                           | 5 (2-11)                     |                                   |
| 2002 | Assam             | 3943 (2796-4109)          |                                | 113 (80-117)                      |                                        | 583 (248-1196)             |                                 | 17 (7-34)                          |                                         | 183 (78-376)         |                           | 5 (2-11)                     |                                   |
| 2003 | Assam             | 3865 (2741-4028)          |                                | 110 (78-114)                      |                                        | 571 (243-1172)             |                                 | 16 (7-33)                          |                                         | 180 (76-369)         |                           | 5 (2-10)                     |                                   |
| 2004 | Assam             | 3806 (2699-3966)          |                                | 108 (76-112)                      |                                        | 564 (239-1154)             |                                 | 16 (7-33)                          |                                         | 177 (75-363)         |                           | 5 (2-10)                     |                                   |
| 2005 | Assam             | 3757 (2664-3915)          |                                | 106 (75-110)                      |                                        | 556 (240-1135)             |                                 | 16 (7-32)                          |                                         | 175 (76-357)         |                           | 5 (2-10)                     |                                   |
| 2006 | Assam             | 3706 (2628-3863)          |                                | 104 (74-108)                      |                                        | 552 (241-1116)             |                                 | 15 (7-31)                          |                                         | 173 (76-351)         |                           | 5 (2-10)                     |                                   |
| 2007 | Assam             | 3678 (2608-3833)          |                                | 103 (73-107)                      |                                        | 549 (243-1104)             |                                 | 15 (7-31)                          |                                         | 173 (77-347)         |                           | 5 (2-10)                     |                                   |
| 2008 | Assam             | 3657 (2593-3811)          |                                | 102 (72-106)                      |                                        | 547 (242-1098)             |                                 | 15 (7-31)                          |                                         | 172 (76-345)         |                           | 5 (2-10)                     |                                   |
| 2009 | Assam             | 3609 (2559-3761)          |                                | 100 (71-105)                      |                                        | 540 (239-1083)             |                                 | 15 (7-30)                          |                                         | 170 (75-341)         |                           | 5 (2-9)                      |                                   |
| 2010 | Assam             | 3576 (2536-3727)          |                                | 100 (71-104)                      |                                        | 535 (237-1073)             |                                 | 15 (7-30)                          |                                         | 168 (74-337)         |                           | 5 (2-9)                      |                                   |
| 2011 | Assam             | 3544 (2513-3694)          |                                | 99 (70-103)                       |                                        | 530 (235-1064)             |                                 | 15 (7-30)                          |                                         | 167 (74-334)         |                           | 5 (2-9)                      |                                   |
| 2012 | Assam             | 3487 (2473-3634)          |                                | 98 (69-102)                       |                                        | 521 (231-1047)             |                                 | 15 (6-29)                          |                                         | 164 (73-329)         |                           | 5 (2-9)                      |                                   |
| 2013 | Assam             | 3481 (2468-3627)          |                                | 98 (70-103)                       |                                        | 520 (230-1045)             |                                 | 15 (7-30)                          |                                         | 163 (72-328)         |                           | 5 (2-9)                      |                                   |
| 2014 | Assam             | 3442 (2441-3587)          |                                | 98 (69-102)                       |                                        | 513 (228-1033)             |                                 | 15 (6-29)                          |                                         | 161 (72-325)         |                           | 5 (2-9)                      |                                   |
| 2015 | Assam             | 3403 (2413-3546)          | 48 (34-50)                     | 97 (69-101)                       | 1 (1-1)                                | 506 (196-1050)             | 8 (3-16)                        | 14 (6-30)                          | 0 (0-0)                                 | 451 (175-935)        | 7 (3-14)                  | 13 (5-27)                    |                                   |
| 2000 | Bihar             | 15229 (10799-15871)       |                                | 123 (87-129)                      |                                        | 2427 (1242-4374)           |                                 | 20 (10-35)                         |                                         | 763 (390-1375)       |                           | 6 (3-11)                     |                                   |
| 2001 | Bihar             | 14837 (10521-15462)       |                                | 118 (83-123)                      |                                        | 2365 (1210-4261)           |                                 | 19 (10-34)                         |                                         | 743 (380-1340)       |                           | 6 (3-11)                     |                                   |
| 2002 | Bihar             | 14372 (10191-14978)       |                                | 112 (79-117)                      |                                        | 2290 (1172-4128)           |                                 | 18 (9-32)                          |                                         | 720 (368-1298)       |                           | 6 (3-10)                     |                                   |
| 2003 | Bihar             | 13877 (9940-14462)        |                                | 107 (76-111)                      |                                        | 2207 (1132-3986)           |                                 | 17 (9-31)                          |                                         | 694 (356-1253)       |                           | 5 (3-10)                     |                                   |
| 2004 | Bihar             | 13356 (9471-13919)        |                                | 101 (72-106)                      |                                        | 2117 (1089-3836)           |                                 | 16 (8-29)                          |                                         | 665 (342-1206)       |                           | 5 (3-9)                      |                                   |
| 2005 | Bihar             | 12843 (9107-13385)        |                                | 96 (68-100)                       |                                        | 2024 (1035-3698)           |                                 | 15 (8-28)                          |                                         | 636 (325-1163)       |                           | 5 (2-9)                      |                                   |
| 2006 | Bihar             | 12339 (8749-12859)        |                                | 91 (64-95)                        |                                        | 1931 (895-3652)            |                                 | 14 (7-27)                          |                                         | 1719 (797-3251)      |                           | 13 (6-24)                    |                                   |
| 2007 | Bihar             | 11836 (8393-12335)        |                                | 86 (61-90)                        |                                        | 1842 (846-3512)            |                                 | 13 (6-26)                          |                                         | 1640 (753-3127)      |                           | 12 (6-23)                    |                                   |
| 2008 | Bihar             | 11312 (8022-11789)        |                                | 81 (58-85)                        |                                        | 1754 (809-3357)            |                                 | 13 (6-24)                          |                                         | 1561 (720-2989)      |                           | 11 (5-22)                    |                                   |
| 2009 | Bihar             | 10721 (7602-11172)        |                                | 77 (54-80)                        |                                        | 1659 (766-3181)            |                                 | 12 (5-23)                          |                                         | 1477 (692-2832)      |                           | 11 (5-20)                    |                                   |
| 2010 | Bihar             | 10123 (7178-10549)        |                                | 72 (51-75)                        |                                        | 1566 (724-3004)            |                                 | 11 (5-21)                          |                                         | 1394 (644-2674)      |                           | 10 (5-19)                    |                                   |
| 2011 | Bihar             | 9489 (6728-9889)          |                                | 67 (47-70)                        |                                        | 1468 (678-2816)            |                                 | 10 (5-20)                          |                                         | 1307 (604-2507)      |                           | 9 (4-18)                     |                                   |
| 2012 | Bihar             | 8736 (6195-9104)          |                                | 61 (43-64)                        |                                        | 1351 (625-2592)            |                                 | 9 (4-18)                           |                                         | 1203 (556-2308)      |                           | 8 (4-16)                     |                                   |
| 2013 | Bihar             | 8071 (5723-8412)          |                                | 56 (40-59)                        |                                        | 1248 (577-2395)            |                                 | 9 (4-17)                           |                                         | 1111 (514-2132)      |                           | 8 (4-15)                     |                                   |
| 2014 | Bihar             | 7335 (5201-7644)          |                                | 51 (36-53)                        |                                        | 1134 (524-2177)            |                                 | 8 (4-15)                           |                                         | 1010 (467-1938)      |                           | 7 (3-13)                     |                                   |
| 2015 | Bihar             | 6659 (4722-6940)          | 93 (66-97)                     | 46 (33-48)                        | 1 (0-1)                                | 1030 (476-1976)            | 15 (7-29)                       | 7 (3-14)                           | 0 (0-0)                                 | 917 (424-1759)       | 14 (6-26)                 | 6 (3-12)                     |                                   |
| 2000 | Chhattisgarh      | 2850 (2021-2970)          |                                | 102 (73-107)                      |                                        | 423 (183-861)              |                                 | 15 (7-31)                          |                                         | 133 (57-271)         |                           | 5 (2-10)                     |                                   |
| 2001 | Chhattisgarh      | 2823 (2002-2942)          |                                | 101 (71-105)                      |                                        | 419 (181-853)              |                                 | 15 (6-30)                          |                                         | 132 (57-268)         |                           | 5 (2-10)                     |                                   |
| 2002 | Chhattisgarh      | 2742 (1944-2857)          |                                | 97 (69-101)                       |                                        | 407 (176-828)              |                                 | 14 (6-29)                          |                                         | 128 (55-260)         |                           | 5 (2-9)                      |                                   |
| 2003 | Chhattisgarh      | 2646 (1877-2758)          |                                | 93 (66-97)                        |                                        | 394 (170-799)              |                                 | 14 (6-28)                          |                                         | 124 (53-251)         |                           | 4 (2-9)                      |                                   |
| 2004 | Chhattisgarh      | 2500 (1772-2605)          |                                | 88 (62-92)                        |                                        | 373 (160-755)              |                                 | 13 (6-27)                          |                                         | 117 (50-237)         |                           | 4 (2-8)                      |                                   |
| 2005 | Chhattisgarh      | 2368 (1679-2468)          |                                | 83 (59-87)                        |                                        | 355 (159-709)              |                                 | 12 (6-25)                          |                                         | 112 (50-223)         |                           | 4 (2-8)                      |                                   |
| 2006 | Chhattisgarh      | 2292 (1625-2388)          |                                | 80 (57-84)                        |                                        | 346 (161-679)              |                                 | 12 (6-24)                          |                                         | 109 (51-214)         |                           | 4 (2-7)                      |                                   |
| 2007 | Chhattisgarh      | 2198 (1509-2218)          |                                | 74 (53-78)                        |                                        | 322 (141-641)              |                                 | 11 (5-22)                          |                                         | 107 (48-212)         |                           | 10 (4-19)                    |                                   |
| 2008 | Chhattisgarh      | 2018 (1431-2103)          |                                | 71 (50-74)                        |                                        | 306 (133-608)              |                                 | 11 (5-21)                          |                                         | 272 (119-541)        |                           | 10 (4-19)                    |                                   |
| 2009 | Chhattisgarh      | 1876 (1330-1955)          |                                | 66 (47-69)                        |                                        | 285 (124-565)              |                                 | 10 (4-20)                          |                                         | 255 (110-503)        |                           | 9 (4-18)                     |                                   |
| 2010 | Chhattisgarh      | 1726 (1224-1798)          |                                | 61 (43-63)                        |                                        | 262 (114-520)              |                                 | 9 (4-18)                           |                                         | 233 (101-463)        |                           | 8 (4-16)                     |                                   |
| 2011 | Chhattisgarh      | 1615 (1145-1683)          |                                | 57 (40-59)                        |                                        | 245 (107-486)              |                                 | 9 (4-17)                           |                                         | 218 (95-433)         |                           | 8 (3-15)                     |                                   |
| 2012 | Chhattisgarh      | 1495 (1060-1558)          |                                | 53 (38-55)                        |                                        | 227 (99-450)               |                                 | 8 (4-16)                           |                                         | 202 (88-401)         |                           | 7 (3-14)                     |                                   |
| 2013 | Chhattisgarh      | 1438 (1020-1499)          |                                | 52 (37-54)                        |                                        | 218 (95-433)               |                                 | 8 (3-16)                           |                                         | 194 (85-386)         |                           | 7 (3-14)                     |                                   |
| 2014 | Chhattisgarh      | 1423 (1009-1483)          |                                | 51 (36-54)                        |                                        | 216 (94-428)               |                                 | 8 (3-15)                           |                                         | 192 (84-381)         |                           | 7 (3-14)                     |                                   |
| 2015 | Chhattisgarh      | 1462 (1037-1524)          | 21 (15-21)                     | 53 (38-55)                        | 1 (1-1)                                | 222 (97-440)               | 3 (1-7)                         | 8 (4-16)                           | 0 (0-0)                                 | 197 (86-392)         | 3 (1-6)                   | 7 (3-14)                     |                                   |
| 2000 | Delhi             | 827 (586-862)             |                                | 53 (37-55)                        |                                        | 124 (51-252)               |                                 | 8 (3-16)                           |                                         | 110 (46-224)         |                           | 7 (3-14)                     |                                   |
| 2001 | Delhi             | 795 (564-828)             |                                | 50 (36-53)                        |                                        | 119 (49-242)               |                                 | 8 (3-15)                           |                                         | 106 (44-215)         |                           | 7 (3-14)                     |                                   |
| 2002 | Delhi             | 760 (539-792)             |                                | 48 (34-50)                        |                                        | 114 (47-231)               |                                 | 7 (3-15)                           |                                         | 101 (42-206)         |                           | 6 (3-13)                     |                                   |
| 2003 | Delhi             | 723 (512-753)             |                                | 46 (32-48)                        |                                        | 109 (45-220)               |                                 |                                    |                                         |                      |                           |                              |                                   |

| Year | State            | Spn pneumonia deaths (UR) | Spn pneumonia deaths: HIV (UR) | Spn pneumonia mortality rate (UR) | Spn pneumonia mortality rate: HIV (UR) | Spn meningitis deaths (UR) | Spn meningitis deaths: HIV (UR) | Spn meningitis mortality rate (UR) | Spn meningitis mortality rate: HIV (UR) | Spn NPNM deaths (UR) | Spn NPNM deaths: HIV (UR) | Spn NPNM mortality rate (UR) | Spn NPNM mortality rate: HIV (UR) |
|------|------------------|---------------------------|--------------------------------|-----------------------------------|----------------------------------------|----------------------------|---------------------------------|------------------------------------|-----------------------------------------|----------------------|---------------------------|------------------------------|-----------------------------------|
| 2005 | Delhi            | 844 (457-871)             |                                | 41 (29-42)                        |                                        | 99 (44-192)                |                                 | 6 (3-12)                           |                                         | 88 (40-171)          |                           | 6 (3-11)                     |                                   |
| 2006 | Delhi            | 605 (429-630)             |                                | 38 (27-40)                        |                                        | 95 (47-177)                |                                 | 6 (3-11)                           |                                         | 85 (42-157)          |                           | 5 (3-10)                     |                                   |
| 2007 | Delhi            | 565 (400-588)             |                                | 36 (25-37)                        |                                        | 91 (50-161)                |                                 | 6 (3-10)                           |                                         | 81 (45-143)          |                           | 5 (3-9)                      |                                   |
| 2008 | Delhi            | 525 (372-547)             |                                | 33 (24-35)                        |                                        | 85 (47-150)                |                                 | 5 (3-10)                           |                                         | 76 (41-133)          |                           | 5 (3-8)                      |                                   |
| 2009 | Delhi            | 484 (343-505)             |                                | 31 (22-32)                        |                                        | 80 (43-138)                |                                 | 5 (3-9)                            |                                         | 71 (38-123)          |                           | 5 (2-8)                      |                                   |
| 2010 | Delhi            | 443 (314-462)             |                                | 29 (20-30)                        |                                        | 74 (39-126)                |                                 | 5 (3-8)                            |                                         | 66 (35-112)          |                           | 4 (2-7)                      |                                   |
| 2011 | Delhi            | 402 (285-419)             |                                | 26 (19-27)                        |                                        | 67 (36-115)                |                                 | 4 (2-7)                            |                                         | 60 (32-102)          |                           | 4 (2-7)                      |                                   |
| 2012 | Delhi            | 356 (252-371)             |                                | 23 (17-24)                        |                                        | 60 (30-121)                |                                 | 4 (2-8)                            |                                         | 54 (27-108)          |                           | 4 (2-7)                      |                                   |
| 2013 | Delhi            | 314 (222-327)             |                                | 21 (15-22)                        |                                        | 54 (27-107)                |                                 | 4 (2-7)                            |                                         | 48 (24-95)           |                           | 3 (2-6)                      |                                   |
| 2014 | Delhi            | 269 (191-280)             |                                | 18 (13-19)                        |                                        | 47 (23-92)                 |                                 | 3 (2-6)                            |                                         | 41 (20-82)           |                           | 3 (1-5)                      |                                   |
| 2015 | Delhi            | 228 (162-238)             | 3 (2-3)                        | 15 (11-16)                        | 0 (0-0)                                | 40 (19-78)                 |                                 | 3 (1-5)                            | 0 (0-0)                                 | 35 (17-69)           | 1 (0-1)                   | 2 (1-5)                      | 0 (0-0)                           |
| 2000 | Goa              | 17 (12-18)                |                                | 15 (10-15)                        |                                        | 3 (1-6)                    |                                 | 2 (1-5)                            |                                         | 3 (1-5)              |                           | 2 (1-4)                      |                                   |
| 2001 | Goa              | 15 (10-15)                |                                | 12 (9-13)                         |                                        | 2 (1-5)                    |                                 | 2 (1-4)                            |                                         | 2 (1-4)              |                           | 2 (1-4)                      |                                   |
| 2002 | Goa              | 10 (7-11)                 |                                | 9 (6-9)                           |                                        | 2 (1-3)                    |                                 | 1 (1-3)                            |                                         | 2 (1-3)              |                           | 1 (1-3)                      |                                   |
| 2003 | Goa              | 13 (9-13)                 |                                | 11 (8-11)                         |                                        | 2 (1-4)                    |                                 | 2 (1-4)                            |                                         | 2 (1-4)              |                           | 2 (1-3)                      |                                   |
| 2004 | Goa              | 13 (9-14)                 |                                | 11 (8-12)                         |                                        | 2 (1-5)                    |                                 | 2 (1-4)                            |                                         | 2 (1-4)              |                           | 2 (1-3)                      |                                   |
| 2005 | Goa              | 14 (10-14)                |                                | 12 (8-12)                         |                                        | 2 (1-5)                    |                                 | 2 (1-4)                            |                                         | 2 (1-4)              |                           | 2 (1-4)                      |                                   |
| 2006 | Goa              | 12 (8-12)                 |                                | 10 (7-11)                         |                                        | 2 (1-4)                    |                                 | 2 (1-4)                            |                                         | 2 (1-4)              |                           | 1 (1-3)                      |                                   |
| 2007 | Goa              | 8 (6-9)                   |                                | 7 (5-7)                           |                                        | 1 (1-3)                    |                                 | 1 (0-2)                            |                                         | 1 (0-3)              |                           | 1 (0-2)                      |                                   |
| 2008 | Goa              | 7 (5-7)                   |                                | 6 (4-6)                           |                                        | 1 (0-2)                    |                                 | 1 (0-2)                            |                                         | 1 (0-2)              |                           | 1 (0-2)                      |                                   |
| 2009 | Goa              | 8 (6-8)                   |                                | 7 (5-7)                           |                                        | 1 (1-3)                    |                                 | 1 (0-2)                            |                                         | 1 (0-2)              |                           | 1 (0-2)                      |                                   |
| 2010 | Goa              | 8 (6-8)                   |                                | 7 (5-7)                           |                                        | 1 (1-3)                    |                                 | 1 (0-2)                            |                                         | 1 (0-2)              |                           | 1 (0-2)                      |                                   |
| 2011 | Goa              | 6 (4-6)                   |                                | 5 (4-6)                           |                                        | 1 (0-2)                    |                                 | 1 (0-2)                            |                                         | 1 (0-2)              |                           | 1 (0-2)                      |                                   |
| 2012 | Goa              | 4 (3-5)                   |                                | 4 (3-4)                           |                                        | 1 (0-2)                    |                                 | 1 (0-1)                            |                                         | 1 (0-1)              |                           | 1 (0-1)                      |                                   |
| 2013 | Goa              | 3 (2-3)                   |                                | 3 (2-3)                           |                                        | 1 (0-1)                    |                                 | 1 (0-1)                            |                                         | 0 (0-1)              |                           | 0 (0-1)                      |                                   |
| 2014 | Goa              | 2 (2-3)                   |                                | 2 (2-2)                           |                                        | 0 (0-1)                    |                                 | 0 (0-1)                            |                                         | 0 (0-1)              |                           | 0 (0-1)                      |                                   |
| 2015 | Goa              | 2 (1-2)                   | 0 (0-0)                        | 2 (1-2)                           | 0 (0-0)                                | 0 (0-1)                    | 0 (0-0)                         | 0 (0-1)                            | 0 (0-0)                                 | 0 (0-1)              | 0 (0-0)                   | 0 (0-1)                      | 0 (0-0)                           |
| 2000 | Gujarat          | 5583 (3959-5819)          |                                | 93 (66-97)                        |                                        | 831 (364-1680)             |                                 | 14 (6-28)                          |                                         | 261 (115-528)        |                           | 4 (2-9)                      |                                   |
| 2001 | Gujarat          | 5317 (3770-5541)          |                                | 88 (62-92)                        |                                        | 790 (347-1600)             |                                 | 13 (6-27)                          |                                         | 248 (109-503)        |                           | 4 (2-8)                      |                                   |
| 2002 | Gujarat          | 5063 (3590-5276)          |                                | 83 (59-87)                        |                                        | 751 (330-1524)             |                                 | 12 (5-25)                          |                                         | 236 (104-479)        |                           | 4 (2-8)                      |                                   |
| 2003 | Gujarat          | 4771 (3383-4972)          |                                | 78 (56-82)                        |                                        | 707 (271-1477)             |                                 | 12 (4-24)                          |                                         | 630 (241-1315)       |                           | 10 (4-22)                    |                                   |
| 2004 | Gujarat          | 4413 (3129-4599)          |                                | 72 (51-75)                        |                                        | 656 (250-1366)             |                                 | 11 (4-22)                          |                                         | 584 (223-1217)       |                           | 10 (4-20)                    |                                   |
| 2005 | Gujarat          | 4195 (2974-4371)          |                                | 69 (49-71)                        |                                        | 628 (256-1281)             |                                 | 10 (4-21)                          |                                         | 559 (228-1141)       |                           | 9 (4-19)                     |                                   |
| 2006 | Gujarat          | 4022 (2852-4192)          |                                | 66 (46-68)                        |                                        | 608 (267-1210)             |                                 | 10 (4-20)                          |                                         | 542 (237-1077)       |                           | 9 (4-18)                     |                                   |
| 2007 | Gujarat          | 3765 (2670-3924)          |                                | 61 (43-64)                        |                                        | 576 (273-1114)             |                                 | 9 (4-18)                           |                                         | 513 (243-992)        |                           | 8 (4-16)                     |                                   |
| 2008 | Gujarat          | 3531 (2503-3679)          |                                | 57 (41-60)                        |                                        | 545 (256-1045)             |                                 | 9 (4-17)                           |                                         | 485 (228-930)        |                           | 8 (4-15)                     |                                   |
| 2009 | Gujarat          | 3275 (2322-3413)          |                                | 53 (38-56)                        |                                        | 508 (237-970)              |                                 | 8 (4-16)                           |                                         | 452 (211-863)        |                           | 7 (3-14)                     |                                   |
| 2010 | Gujarat          | 3021 (2142-3149)          |                                | 49 (35-52)                        |                                        | 469 (219-894)              |                                 | 8 (4-15)                           |                                         | 417 (195-796)        |                           | 7 (3-13)                     |                                   |
| 2011 | Gujarat          | 2809 (1992-2928)          |                                | 46 (33-48)                        |                                        | 436 (204-832)              |                                 | 7 (3-14)                           |                                         | 388 (181-740)        |                           | 6 (3-12)                     |                                   |
| 2012 | Gujarat          | 2517 (1955-2727)          |                                | 43 (31-45)                        |                                        | 405 (190-775)              |                                 | 7 (3-13)                           |                                         | 362 (169-690)        |                           | 6 (3-11)                     |                                   |
| 2013 | Gujarat          | 2496 (1770-2601)          |                                | 42 (30-43)                        |                                        | 387 (181-739)              |                                 | 6 (3-12)                           |                                         | 345 (161-658)        |                           | 6 (3-11)                     |                                   |
| 2014 | Gujarat          | 2375 (1684-2475)          |                                | 40 (28-42)                        |                                        | 369 (172-703)              |                                 | 6 (3-12)                           |                                         | 328 (153-626)        |                           | 6 (3-11)                     |                                   |
| 2015 | Gujarat          | 2257 (1601-2352)          | 32 (22-33)                     | 38 (27-40)                        | 1 (0-1)                                | 350 (164-668)              | 5 (2-10)                        | 6 (3-11)                           | 0 (0-0)                                 | 312 (146-595)        | 5 (2-9)                   | 5 (2-10)                     | 0 (0-0)                           |
| 2000 | Haryana          | 3092 (2192-3222)          |                                | 120 (85-125)                      |                                        | 485 (240-897)              |                                 | 19 (9-35)                          |                                         | 152 (76-282)         |                           | 6 (3-11)                     |                                   |
| 2001 | Haryana          | 2936 (2082-3060)          |                                | 113 (80-118)                      |                                        | 460 (228-852)              |                                 | 18 (9-33)                          |                                         | 145 (72-268)         |                           | 6 (3-10)                     |                                   |
| 2002 | Haryana          | 2767 (1962-2884)          |                                | 106 (75-110)                      |                                        | 433 (215-803)              |                                 | 17 (8-31)                          |                                         | 136 (68-252)         |                           | 5 (3-10)                     |                                   |
| 2003 | Haryana          | 2587 (1834-2696)          |                                | 98 (70-103)                       |                                        | 405 (201-751)              |                                 | 15 (8-29)                          |                                         | 127 (63-236)         |                           | 5 (2-9)                      |                                   |
| 2004 | Haryana          | 2396 (1699-2497)          |                                | 91 (64-95)                        |                                        | 375 (168-713)              |                                 | 14 (6-27)                          |                                         | 334 (150-635)        |                           | 13 (6-24)                    |                                   |
| 2005 | Haryana          | 2172 (1540-2264)          |                                | 82 (58-86)                        |                                        | 343 (163-639)              |                                 | 13 (6-24)                          |                                         | 305 (145-569)        |                           | 12 (5-22)                    |                                   |
| 2006 | Haryana          | 1941 (1376-2022)          |                                | 73 (52-76)                        |                                        | 309 (156-563)              |                                 | 12 (6-21)                          |                                         | 275 (139-502)        |                           | 10 (5-19)                    |                                   |
| 2007 | Haryana          | 1839 (1304-1916)          |                                | 69 (49-72)                        |                                        | 296 (159-527)              |                                 | 11 (6-20)                          |                                         | 263 (142-469)        |                           | 10 (5-18)                    |                                   |
| 2008 | Haryana          | 1692 (1200-1764)          |                                | 64 (45-66)                        |                                        | 274 (147-485)              |                                 | 10 (5-19)                          |                                         | 244 (130-431)        |                           | 9 (5-16)                     |                                   |
| 2009 | Haryana          | 1501 (1065-1565)          |                                | 57 (40-59)                        |                                        | 244 (128-431)              |                                 | 9 (5-16)                           |                                         | 217 (114-384)        |                           | 8 (4-14)                     |                                   |
| 2010 | Haryana          | 1454 (1031-1515)          |                                | 55 (39-57)                        |                                        | 235 (122-418)              |                                 | 9 (5-16)                           |                                         | 210 (109-373)        |                           | 8 (4-14)                     |                                   |
| 2011 | Haryana          | 1371 (972-1429)           |                                | 52 (37-54)                        |                                        | 221 (114-396)              |                                 | 8 (4-15)                           |                                         | 197 (101-352)        |                           | 7 (4-13)                     |                                   |
| 2012 | Haryana          | 1205 (855-1256)           |                                | 46 (33-48)                        |                                        | 194 (99-349)               |                                 | 7 (4-13)                           |                                         | 173 (88-311)         |                           | 7 (3-12)                     |                                   |
| 2013 | Haryana          | 1223 (868-1275)           |                                | 47 (33-49)                        |                                        | 197 (100-354)              |                                 | 8 (4-14)                           |                                         | 175 (89-315)         |                           | 7 (3-12)                     |                                   |
| 2014 | Haryana          | 1198 (850-1249)           |                                | 47 (33-49)                        |                                        | 192 (98-347)               |                                 | 7 (4-13)                           |                                         | 171 (87-309)         |                           | 7 (3-12)                     |                                   |
| 2015 | Haryana          | 1212 (859-1263)           | 17 (12-18)                     | 47 (34-49)                        | 1 (0-1)                                | 195 (99-351)               | 3 (1-5)                         | 8 (4-14)                           | 0 (0-0)                                 | 173 (88-312)         | 3 (1-5)                   | 7 (3-12)                     | 0 (0-0)                           |
| 2000 | Himachal Pradesh | 544 (386-567)             |                                | 85 (60-89)                        |                                        | 84 (39-162)                |                                 | 13 (6-25)                          |                                         | 75 (34-144)          |                           | 12 (6-23)                    |                                   |
| 2001 | Himachal Pradesh | 503 (357-524)             |                                | 78 (56-82)                        |                                        | 78 (36-149)                |                                 | 12 (6-23)                          |                                         | 69 (32-133)          |                           | 11 (5-21)                    |                                   |
| 2002 | Himachal Pradesh | 464 (329-484)             |                                | 72 (51-75)                        |                                        | 72 (33-138)                |                                 | 11 (5-22)                          |                                         | 64 (29-123)          |                           | 10 (5-19)                    |                                   |
| 2003 | Himachal Pradesh | 429 (304-447)             |                                | 67 (48-70)                        |                                        | 66 (30-127)                |                                 | 10 (5-20)                          |                                         | 59 (27-113)          |                           | 9 (4-18)                     |                                   |
| 2004 | Himachal Pradesh | 396 (281-412)             |                                | 62 (44-65)                        |                                        | 61 (28-118)                |                                 | 10 (4-18)                          |                                         | 55 (25-105)          |                           | 9 (4-16)                     |                                   |
| 2005 | Himachal Pradesh | 365 (259-380)             |                                | 58 (41-60)                        |                                        | 57 (27-108)                |                                 | 9 (4-17)                           |                                         | 51 (24-96)           |                           | 8 (4-15)                     |                                   |
| 2006 | Himachal Pradesh | 337 (239-351)             |                                | 53 (39-55)                        |                                        | 53 (26-99)                 |                                 | 8 (4-16)                           |                                         | 47 (23-88)           |                           | 7 (4-14)                     |                                   |
| 2007 | Himachal Pradesh | 310 (220-323)             |                                | 49 (35-51)                        |                                        | 49 (25-90)                 |                                 | 8 (4-14)                           |                                         | 44 (22-80)           |                           | 7 (3-13)                     |                                   |
| 2008 | Himachal Pradesh | 286 (203-298)             |                                | 46 (32-48)                        |                                        | 46 (23-83)                 |                                 | 7 (4-13)                           |                                         | 41 (20-74)           |                           | 7 (3-12)                     |                                   |
| 2009 | Himachal Pradesh | 263 (186-274)             |                                | 43 (22-76)                        |                                        | 43 (22-76)                 |                                 | 7 (4-12)                           |                                         | 38 (19-67)           |                           | 6 (3-11)                     |                                   |
| 2010 | Himachal Pradesh | 241 (171-252)             |                                | 39 (28-41)                        |                                        | 40 (21-69)                 |                                 | 6 (3-11)                           |                                         | 35 (19-61)           |                           | 6 (3-10)                     |                                   |
| 2011 | Himachal Pradesh | 223 (158-232)             |                                | 37 (26-38)                        |                                        | 37 (21-63)                 |                                 | 6 (3-10)                           |                                         | 33 (18-56)           |                           | 5 (3-9)                      |                                   |
| 2012 | Himachal Pradesh | 207 (147-215)             |                                | 34 (24-36)                        |                                        | 35 (19-58)                 |                                 | 6 (3-10)                           |                                         | 31 (17-51)           |                           | 5 (3-9)                      |                                   |
| 2013 | Himachal Pradesh | 198 (140-206)             |                                | 34 (24-35)                        |                                        | 34 (18-55)                 |                                 | 6 (3-9)                            |                                         | 30 (16-49)           |                           | 5 (3-8)                      |                                   |
| 2014 | Himachal Pradesh | 193 (137-201)             |                                | 33 (24-35)                        |                                        | 33 (18-54)                 |                                 | 6 (3-9)                            |                                         | 29 (16-48)           |                           | 5 (3-9)                      |                                   |
| 2015 | Himachal Pradesh | 194 (138-203)             | 3 (2-3)                        | 34 (24-35)                        | 0 (0-0)                                | 33 (18-54)                 | 0 (0-1)                         | 6 (3-9)                            | 0 (0-0)                                 | 30 (16-48)           | 0 (0-1)                   | 5 (3-8)                      | 0 (0-0)                           |
| 2000 | Jammu & Kashmir  | 646 (458-673)             |                                | 61 (43-64)                        |                                        | 112 (59-179)               |                                 | 11 (6-17)                          |                                         | 100 (52-159)         |                           | 9 (5-15)                     |                                   |
| 2001 | Jammu & Kashmir  | 607 (431-633)             |                                | 55 (39-57)                        |                                        | 106 (55-168)               |                                 | 10 (5-15)                          |                                         | 94 (49-150)          |                           | 9 (4-14)                     |                                   |
| 2002 | Jammu & Kashmir  | 571 (405-595)             |                                | 50 (35-52)                        |                                        | 99 (52-158)                |                                 | 9 (5-14)                           |                                         | 88 (46-141)          |                           | 8 (4-12)                     |                                   |
| 2003 | Jammu & Kashmir  | 537 (381-560)             |                                | 45 (32-47)                        |                                        | 93 (49-149)                |                                 | 8 (4-12)                           |                                         | 82 (43-133)          |                           | 7 (4-11)                     |                                   |
| 2004 | Jammu & Kashmir  | 506 (359-527)             |                                | 41 (28-43)                        |                                        | 86 (46-140)                |                                 | 7 (4-11)                           |                                         | 77 (41-125)          |                           | 6 (3-10)                     |                                   |
| 2005 | Jammu & Kashmir  | 476 (337-466)             |                                | 37 (26-39)                        |                                        | 79 (44-134)                |                                 | 6 (3-10)                           |                                         | 71 (39-120)          |                           | 5 (3-9)                      |                                   |
| 2006 | Jammu & Kashmir  | 447 (317-466)             |                                | 33 (24-35)                        |                                        | 73 (38-128)                |                                 | 5 (3-10)                           |                                         | 65 (34-114)          |                           | 5 (3-9)                      |                                   |
| 2007 | Jammu & Kashmir  | 418 (296-436)             |                                | 30 (21-31)                        |                                        | 68 (33-122)                |                                 | 5 (2-9)                            |                                         | 60 (30-108)          |                           | 4 (2-8)                      |                                   |
| 2008 | Jammu & Kashmir  | 390 (277-406)             |                                | 27 (19-28)                        |                                        | 62 (31-113)                |                                 | 4 (2-8)                            |                                         | 56 (28-101)          |                           | 4 (2-7)                      |                                   |
| 2009 | Jammu & Kashmir  | 360 (255-375)             |                                | 24 (17-25)                        |                                        | 57 (29-105)                |                                 | 4 (2-7)                            |                                         | 51 (25-93)           |                           | 3 (2-6)                      |                                   |
| 2010 | Jammu & Kashmir  | 329 (233-343)             |                                | 22 (15-22)                        |                                        | 52 (26-96)                 |                                 | 3 (2-6)                            |                                         | 47 (23-85)           |                           | 3 (2-6)                      |                                   |
| 2011 | Jammu & Kashmir  | 298 (211-310)             |                                | 19 (13-20)                        |                                        | 47 (24-87)                 |                                 | 3 (1-5)                            |                                         | 42 (21-77)           |                           | 3 (1-5)                      |                                   |

Spn = *Streptococcus pneumoniae*; npnm = non-pneumonia, non-meningitis; HIV = HIV-infected cases only; UR = uncertainty range



| Year | State           | Spn pneumonia deaths (UR) | Spn pneumonia deaths: HIV (UR) | Spn pneumonia mortality rate (UR) | Spn pneumonia mortality rate: HIV (UR) | Spn meningitis deaths (UR) | Spn meningitis deaths: HIV (UR) | Spn meningitis mortality rate (UR) | Spn meningitis mortality rate: HIV (UR) | Spn NPNM deaths (UR) | Spn NPNM deaths: HIV (UR) | Spn NPNM mortality rate (UR) | Spn NPNM mortality rate: HIV (UR) |
|------|-----------------|---------------------------|--------------------------------|-----------------------------------|----------------------------------------|----------------------------|---------------------------------|------------------------------------|-----------------------------------------|----------------------|---------------------------|------------------------------|-----------------------------------|
| 2012 | Jammu & Kashmir | 264 (187-275)             |                                | 16 (12-17)                        |                                        | 42 (21-77)                 |                                 | 3 (1-5)                            |                                         | 37 (19-68)           |                           | 2 (1-4)                      |                                   |
| 2013 | Jammu & Kashmir | 237 (168-247)             |                                | 14 (10-15)                        |                                        | 38 (19-69)                 |                                 | 2 (1-4)                            |                                         | 34 (17-61)           |                           | 2 (1-4)                      |                                   |
| 2014 | Jammu & Kashmir | 216 (153-225)             |                                | 13 (9-13)                         |                                        | 34 (17-63)                 |                                 | 2 (1-4)                            |                                         | 31 (15-56)           |                           | 2 (1-3)                      |                                   |
| 2015 | Jammu & Kashmir | 205 (145-214)             | 3 (2-3)                        | 12 (8-12)                         | 0 (0-0)                                | 33 (16-60)                 | 0 (0-1)                         | 2 (1-3)                            | 0 (0-0)                                 | 29 (14-53)           | 0 (0-1)                   | 2 (1-3)                      | 0 (0-0)                           |
| 2000 | Jharkhand       | 3098 (2197-3228)          |                                | 84 (60-88)                        |                                        | 451 (190-945)              |                                 | 12 (5-26)                          |                                         | 142 (60-297)         |                           | 4 (2-8)                      |                                   |
| 2001 | Jharkhand       | 3047 (2161-3176)          |                                | 81 (58-85)                        |                                        | 442 (160-857)              |                                 | 12 (4-26)                          |                                         | 394 (142-852)        |                           | 11 (4-23)                    |                                   |
| 2002 | Jharkhand       | 2957 (2097-3082)          |                                | 78 (55-81)                        |                                        | 429 (155-928)              |                                 | 11 (4-24)                          |                                         | 382 (138-827)        |                           | 10 (4-22)                    |                                   |
| 2003 | Jharkhand       | 2902 (2058-3025)          |                                | 76 (54-79)                        |                                        | 420 (152-911)              |                                 | 11 (4-24)                          |                                         | 374 (136-811)        |                           | 10 (4-21)                    |                                   |
| 2004 | Jharkhand       | 2724 (1932-2839)          |                                | 70 (50-73)                        |                                        | 395 (143-855)              |                                 | 10 (4-22)                          |                                         | 351 (127-761)        |                           | 9 (3-20)                     |                                   |
| 2005 | Jharkhand       | 2470 (1752-2574)          |                                | 63 (45-66)                        |                                        | 358 (131-774)              |                                 | 9 (3-20)                           |                                         | 319 (117-689)        |                           | 8 (3-18)                     |                                   |
| 2006 | Jharkhand       | 2438 (1728-2540)          |                                | 62 (44-64)                        |                                        | 354 (131-762)              |                                 | 9 (3-19)                           |                                         | 315 (117-678)        |                           | 8 (3-17)                     |                                   |
| 2007 | Jharkhand       | 2258 (1601-2353)          |                                | 57 (40-59)                        |                                        | 328 (123-704)              |                                 | 8 (3-18)                           |                                         | 292 (109-627)        |                           | 7 (3-16)                     |                                   |
| 2008 | Jharkhand       | 2018 (1431-2103)          |                                | 50 (36-52)                        |                                        | 294 (110-630)              |                                 | 7 (3-16)                           |                                         | 262 (98-561)         |                           | 7 (2-14)                     |                                   |
| 2009 | Jharkhand       | 1790 (1269-1865)          |                                | 44 (31-46)                        |                                        | 251 (97-558)               |                                 | 6 (2-14)                           |                                         | 232 (87-497)         |                           | 6 (2-12)                     |                                   |
| 2010 | Jharkhand       | 1809 (1283-1886)          |                                | 45 (32-47)                        |                                        | 264 (99-564)               |                                 | 7 (2-14)                           |                                         | 235 (88-502)         |                           | 6 (2-12)                     |                                   |
| 2011 | Jharkhand       | 1727 (1225-1800)          |                                | 43 (30-44)                        |                                        | 252 (94-539)               |                                 | 6 (2-13)                           |                                         | 224 (84-480)         |                           | 6 (2-12)                     |                                   |
| 2012 | Jharkhand       | 1606 (1139-1674)          |                                | 40 (28-41)                        |                                        | 234 (87-501)               |                                 | 6 (2-12)                           |                                         | 208 (78-446)         |                           | 5 (2-11)                     |                                   |
| 2013 | Jharkhand       | 1465 (1039-1527)          |                                | 36 (26-38)                        |                                        | 213 (80-457)               |                                 | 5 (2-11)                           |                                         | 190 (71-407)         |                           | 5 (2-10)                     |                                   |
| 2014 | Jharkhand       | 1317 (934-1372)           |                                | 32 (23-34)                        |                                        | 192 (72-411)               |                                 | 5 (2-10)                           |                                         | 171 (64-366)         |                           | 4 (2-9)                      |                                   |
| 2015 | Jharkhand       | 1070 (830-1213)           | 16 (12-17)                     | 29 (20-30)                        | 0 (0-0)                                | 170 (64-365)               | 3 (1-5)                         | 4 (2-9)                            | 0 (0-0)                                 | 152 (57-325)         | 2 (1-5)                   | 4 (1-8)                      | 0 (0-0)                           |
| 2000 | Karnataka       | 4146 (2940-4321)          |                                | 74 (52-77)                        |                                        | 627 (270-1252)             |                                 | 11 (5-22)                          |                                         | 558 (240-1115)       |                           | 10 (4-20)                    |                                   |
| 2001 | Karnataka       | 3957 (2806-4124)          |                                | 70 (50-73)                        |                                        | 595 (257-1195)             |                                 | 11 (5-21)                          |                                         | 533 (229-1064)       |                           | 9 (4-19)                     |                                   |
| 2002 | Karnataka       | 3843 (2725-4005)          |                                | 68 (48-70)                        |                                        | 581 (250-1161)             |                                 | 10 (4-20)                          |                                         | 517 (222-1033)       |                           | 9 (4-18)                     |                                   |
| 2003 | Karnataka       | 3734 (2648-3891)          |                                | 66 (46-68)                        |                                        | 566 (243-1128)             |                                 | 10 (4-20)                          |                                         | 504 (216-1004)       |                           | 9 (4-18)                     |                                   |
| 2004 | Karnataka       | 3613 (2562-3765)          |                                | 63 (45-66)                        |                                        | 550 (235-1091)             |                                 | 10 (4-19)                          |                                         | 489 (209-971)        |                           | 9 (4-17)                     |                                   |
| 2005 | Karnataka       | 3469 (2460-3616)          |                                | 61 (43-63)                        |                                        | 531 (236-1039)             |                                 | 9 (4-18)                           |                                         | 473 (210-925)        |                           | 8 (4-16)                     |                                   |
| 2006 | Karnataka       | 3313 (2349-3453)          |                                | 58 (41-60)                        |                                        | 511 (235-984)              |                                 | 9 (4-17)                           |                                         | 455 (209-876)        |                           | 8 (4-15)                     |                                   |
| 2007 | Karnataka       | 3122 (2214-3254)          |                                | 55 (39-57)                        |                                        | 485 (232-920)              |                                 | 8 (4-16)                           |                                         | 432 (207-819)        |                           | 8 (4-14)                     |                                   |
| 2008 | Karnataka       | 2915 (2067-3038)          |                                | 51 (36-53)                        |                                        | 457 (217-859)              |                                 | 8 (4-15)                           |                                         | 407 (193-764)        |                           | 7 (3-13)                     |                                   |
| 2009 | Karnataka       | 2689 (1906-2802)          |                                | 47 (34-49)                        |                                        | 425 (207-787)              |                                 | 7 (4-14)                           |                                         | 378 (184-701)        |                           | 7 (3-12)                     |                                   |
| 2010 | Karnataka       | 2446 (1734-2549)          |                                | 43 (31-45)                        |                                        | 390 (195-711)              |                                 | 7 (3-13)                           |                                         | 347 (174-633)        |                           | 6 (3-11)                     |                                   |
| 2011 | Karnataka       | 2197 (1558-2290)          |                                | 39 (28-41)                        |                                        | 353 (182-635)              |                                 | 6 (3-11)                           |                                         | 314 (162-565)        |                           | 6 (3-10)                     |                                   |
| 2012 | Karnataka       | 1910 (1354-1991)          |                                | 34 (24-36)                        |                                        | 309 (164-548)              |                                 | 6 (3-10)                           |                                         | 275 (146-488)        |                           | 5 (3-9)                      |                                   |
| 2013 | Karnataka       | 1825 (1152-1693)          |                                | 29 (21-31)                        |                                        | 264 (140-466)              |                                 | 5 (3-8)                            |                                         | 235 (124-415)        |                           | 4 (2-8)                      |                                   |
| 2014 | Karnataka       | 1308 (928-1364)           |                                | 24 (17-25)                        |                                        | 213 (113-375)              |                                 | 4 (2-7)                            |                                         | 190 (100-334)        |                           | 3 (2-6)                      |                                   |
| 2015 | Karnataka       | 1017 (721-1060)           | 14 (10-15)                     | 19 (13-20)                        | 0 (0-0)                                | 166 (87-292)               | 2 (1-4)                         | 3 (2-5)                            | 0 (0-0)                                 | 148 (78-260)         | 2 (1-4)                   | 3 (1-5)                      | 0 (0-0)                           |
| 2000 | Kerala          | 372 (264-388)             |                                | 12 (8-12)                         |                                        | 59 (23-133)                |                                 | 2 (1-4)                            |                                         | 53 (20-118)          |                           | 2 (1-4)                      |                                   |
| 2001 | Kerala          | 360 (255-375)             |                                | 11 (8-12)                         |                                        | 57 (22-128)                |                                 | 2 (1-4)                            |                                         | 51 (19-114)          |                           | 2 (1-4)                      |                                   |
| 2002 | Kerala          | 347 (246-362)             |                                | 11 (8-12)                         |                                        | 55 (21-124)                |                                 | 2 (1-4)                            |                                         | 49 (19-110)          |                           | 2 (1-4)                      |                                   |
| 2003 | Kerala          | 337 (239-351)             |                                | 11 (8-11)                         |                                        | 54 (20-120)                |                                 | 2 (1-4)                            |                                         | 48 (18-107)          |                           | 2 (1-3)                      |                                   |
| 2004 | Kerala          | 327 (232-340)             |                                | 11 (8-11)                         |                                        | 53 (20-116)                |                                 | 2 (1-4)                            |                                         | 47 (18-104)          |                           | 2 (1-3)                      |                                   |
| 2005 | Kerala          | 318 (226-332)             |                                | 11 (7-11)                         |                                        | 52 (22-112)                |                                 | 2 (1-4)                            |                                         | 46 (19-100)          |                           | 2 (1-3)                      |                                   |
| 2006 | Kerala          | 313 (222-326)             |                                | 10 (7-11)                         |                                        | 52 (24-108)                |                                 | 2 (1-4)                            |                                         | 47 (21-96)           |                           | 2 (1-3)                      |                                   |
| 2007 | Kerala          | 308 (218-321)             |                                | 10 (7-11)                         |                                        | 53 (27-105)                |                                 | 2 (1-4)                            |                                         | 47 (24-93)           |                           | 2 (1-3)                      |                                   |
| 2008 | Kerala          | 306 (217-319)             |                                | 11 (7-11)                         |                                        | 53 (27-104)                |                                 | 2 (1-4)                            |                                         | 47 (24-92)           |                           | 2 (1-3)                      |                                   |
| 2009 | Kerala          | 304 (215-316)             |                                | 11 (8-11)                         |                                        | 53 (26-103)                |                                 | 2 (1-4)                            |                                         | 47 (23-92)           |                           | 2 (1-3)                      |                                   |
| 2010 | Kerala          | 302 (214-315)             |                                | 11 (8-11)                         |                                        | 53 (26-103)                |                                 | 2 (1-4)                            |                                         | 47 (23-91)           |                           | 2 (1-3)                      |                                   |
| 2011 | Kerala          | 302 (214-315)             |                                | 11 (8-12)                         |                                        | 53 (26-103)                |                                 | 2 (1-4)                            |                                         | 47 (23-91)           |                           | 2 (1-3)                      |                                   |
| 2012 | Kerala          | 299 (212-312)             |                                | 11 (8-12)                         |                                        | 52 (26-102)                |                                 | 2 (1-4)                            |                                         | 47 (23-91)           |                           | 2 (1-3)                      |                                   |
| 2013 | Kerala          | 301 (213-313)             |                                | 12 (8-12)                         |                                        | 53 (26-102)                |                                 | 2 (1-4)                            |                                         | 47 (23-91)           |                           | 2 (1-3)                      |                                   |
| 2014 | Kerala          | 300 (213-313)             |                                | 12 (8-12)                         |                                        | 53 (26-102)                |                                 | 2 (1-4)                            |                                         | 47 (23-91)           |                           | 2 (1-4)                      |                                   |
| 2015 | Kerala          | 303 (215-316)             | 4 (3-4)                        | 12 (8-13)                         | 0 (0-0)                                | 53 (26-103)                | 1 (0-2)                         | 2 (1-4)                            | 0 (0-0)                                 | 47 (23-92)           | 1 (0-1)                   | 2 (1-4)                      | 0 (0-0)                           |
| 2000 | Madhya Pradesh  | 13860 (9828-14444)        |                                | 165 (117-172)                     |                                        | 2033 (847-4228)            |                                 | 24 (10-50)                         |                                         | 639 (266-1329)       |                           | 8 (3-16)                     |                                   |
| 2001 | Madhya Pradesh  | 13286 (9407-13825)        |                                | 157 (111-164)                     |                                        | 1946 (811-4047)            |                                 | 23 (10-48)                         |                                         | 612 (255-1272)       |                           | 7 (3-15)                     |                                   |
| 2002 | Madhya Pradesh  | 12711 (9013-13246)        |                                | 150 (106-156)                     |                                        | 1866 (777-3877)            |                                 | 22 (9-46)                          |                                         | 567 (244-1219)       |                           | 7 (3-14)                     |                                   |
| 2003 | Madhya Pradesh  | 12156 (8620-12668)        |                                | 143 (102-149)                     |                                        | 1787 (743-3708)            |                                 | 21 (9-44)                          |                                         | 562 (234-1166)       |                           | 7 (3-14)                     |                                   |
| 2004 | Madhya Pradesh  | 11585 (8215-12073)        |                                | 137 (97-142)                      |                                        | 1709 (708-3534)            |                                 | 20 (8-42)                          |                                         | 537 (223-1111)       |                           | 6 (3-13)                     |                                   |
| 2005 | Madhya Pradesh  | 11047 (7833-11512)        |                                | 130 (92-136)                      |                                        | 1637 (700-3346)            |                                 | 19 (8-39)                          |                                         | 515 (220-1052)       |                           | 6 (3-12)                     |                                   |
| 2006 | Madhya Pradesh  | 10513 (7455-10956)        |                                | 124 (88-129)                      |                                        | 1567 (691-3160)            |                                 | 18 (8-37)                          |                                         | 493 (217-994)        |                           | 6 (3-12)                     |                                   |
| 2007 | Madhya Pradesh  | 9958 (7061-10377)         |                                | 117 (83-122)                      |                                        | 1493 (679-2970)            |                                 | 18 (8-35)                          |                                         | 469 (214-834)        |                           | 6 (3-11)                     |                                   |
| 2008 | Madhya Pradesh  | 9416 (6677-9812)          |                                | 111 (79-116)                      |                                        | 1417 (642-2808)            |                                 | 17 (8-33)                          |                                         | 445 (202-883)        |                           | 5 (2-10)                     |                                   |
| 2009 | Madhya Pradesh  | 8863 (6285-9237)          |                                | 105 (75-110)                      |                                        | 1336 (605-2643)            |                                 | 16 (7-31)                          |                                         | 420 (190-831)        |                           | 5 (2-10)                     |                                   |
| 2010 | Madhya Pradesh  | 8330 (6907-8681)          |                                | 99 (71-104)                       |                                        | 1256 (568-2484)            |                                 | 15 (7-30)                          |                                         | 395 (179-781)        |                           | 5 (2-9)                      |                                   |
| 2011 | Madhya Pradesh  | 7847 (5564-8177)          |                                | 94 (67-98)                        |                                        | 1180 (535-2340)            |                                 | 14 (6-28)                          |                                         | 371 (168-736)        |                           | 4 (2-9)                      |                                   |
| 2012 | Madhya Pradesh  | 7362 (5220-7672)          |                                | 89 (63-93)                        |                                        | 1104 (502-2196)            |                                 | 13 (6-26)                          |                                         | 347 (158-690)        |                           | 4 (2-8)                      |                                   |
| 2013 | Madhya Pradesh  | 7041 (4993-7338)          |                                | 86 (61-90)                        |                                        | 1052 (421-2159)            |                                 | 13 (6-26)                          |                                         | 937 (375-1922)       |                           | 11 (5-24)                    |                                   |
| 2014 | Madhya Pradesh  | 6398 (4757-6991)          |                                | 83 (60-87)                        |                                        | 1000 (401-2057)            |                                 | 12 (6-25)                          |                                         | 890 (357-1831)       |                           | 11 (4-23)                    |                                   |
| 2015 | Madhya Pradesh  | 6431 (4560-6702)          | 90 (64-94)                     | 80 (57-84)                        | 1 (1-1)                                | 956 (385-1972)             | 14 (6-29)                       | 12 (6-25)                          | 0 (0-0)                                 | 851 (343-1756)       | 13 (5-26)                 | 11 (4-22)                    | 0 (0-0)                           |
| 2000 | Maharashtra     | 5861 (4156-6108)          |                                | 54 (38-56)                        |                                        | 904 (414-1743)             |                                 | 8 (4-16)                           |                                         | 804 (368-1552)       |                           | 7 (3-14)                     |                                   |
| 2001 | Maharashtra     | 5469 (3878-5699)          |                                | 50 (36-52)                        |                                        | 843 (386-1627)             |                                 | 8 (4-15)                           |                                         | 751 (344-1448)       |                           | 7 (3-13)                     |                                   |
| 2002 | Maharashtra     | 5074 (3598-5288)          |                                | 46 (33-48)                        |                                        | 783 (358-1509)             |                                 | 7 (3-14)                           |                                         | 697 (319-1344)       |                           | 6 (3-12)                     |                                   |
| 2003 | Maharashtra     | 4681 (3320-4879)          |                                | 43 (30-45)                        |                                        | 724 (330-1393)             |                                 | 7 (3-13)                           |                                         | 644 (294-1240)       |                           | 6 (3-11)                     |                                   |
| 2004 | Maharashtra     | 4299 (3049-4481)          |                                | 40 (28-41)                        |                                        | 667 (303-1279)             |                                 | 6 (3-12)                           |                                         | 594 (270-1139)       |                           | 5 (2-10)                     |                                   |
| 2005 | Maharashtra     | 3944 (2796-4110)          |                                | 36 (26-38)                        |                                        | 616 (280-1164)             |                                 | 6 (3-11)                           |                                         | 548 (258-1036)       |                           | 5 (2-10)                     |                                   |
| 2006 | Maharashtra     | 3596 (2550-3748)          |                                | 33 (24-35)                        |                                        | 566 (276-1053)             |                                 | 5 (3-10)                           |                                         | 503 (246-938)        |                           | 5 (2-9)                      |                                   |
| 2007 | Maharashtra     | 3253 (2306-3390)          |                                | 30 (21-31)                        |                                        | 515 (261-945)              |                                 | 5 (2-9)                            |                                         | 459 (232-841)        |                           | 4 (2-8)                      |                                   |
| 2008 | Maharashtra     | 2944 (2088-3068)          |                                | 28 (20-29)                        |                                        | 469 (236-855)              |                                 | 4 (2-8)                            |                                         | 417 (210-761)        |                           | 4 (2-7)                      |                                   |
| 2009 | Maharashtra     | 2630 (1865-2741)          |                                | 25 (18-26)                        |                                        | 420 (211-764)              |                                 | 4 (2-7)                            |                                         | 374 (188-680)        |                           | 4 (2-6)                      |                                   |
| 2010 | Maharashtra     | 2321 (1646-2419)          |                                | 22 (16-23)                        |                                        | 372 (186-674)              |                                 | 4 (2-6)                            |                                         | 332 (166-600)        |                           | 3 (2-6)                      |                                   |
| 2011 | Maharashtra     | 2077 (1473-2164)          |                                | 20 (14-21)                        |                                        | 335 (167-603)              |                                 | 3 (2-6)                            |                                         | 298 (149-537)        |                           | 3 (1-5)                      |                                   |
| 2012 | Maharashtra     | 1805 (1280-1881)          |                                | 18 (12-18)                        |                                        | 294 (128-630)              |                                 | 3 (1-5)                            |                                         | 261 (114-561)        |                           | 3 (1-5)                      |                                   |
| 2013 | Maharashtra     | 1566 (1110-1632)          |                                | 15 (11-16)                        |                                        | 257 (111-546)              |                                 | 3 (1-5)                            |                                         | 228 (99-486)         |                           | 3 (1-5)                      |                                   |
| 2014 | Maharashtra     | 1337 (948-1393)           |                                | 13 (9-14)                         |                                        | 220 (95-466)               |                                 | 2 (1-5)                            |                                         | 196 (85-415)         |                           | 2 (1-4)                      |                                   |
| 2015 | Maharashtra     | 1154 (818-1203)           | 16 (11-17)                     | 12 (8-12)                         | 0 (0-0)                                | 191 (82-403)               | 3 (1-6)                         | 2 (1-4)                            | 0 (0-0)                                 | 170 (73-358)         | 3 (1-5)                   | 2 (1-4)                      | 0 (0-0)                           |
| 2000 | Manipur         | 80 (57-83)                |                                | 35 (25-36)                        |                                        | 11 (4-25)                  |                                 | 5 (2-11)                           |                                         | 10 (4-22)            |                           | 4 (2-10)                     |                                   |
| 2001 | Manipur         | 76 (54-79)                |                                | 32 (23-34)                        |                                        | 11 (4-24)                  |                                 | 5 (2-10)                           |                                         | 10 (3-21)            |                           | 4 (1-9)                      |                                   |
| 2002 | Manipur         | 73 (52-76)                |                                | 30 (21-31)                        |                                        | 10 (4-23)                  |                                 | 4 (2-10)                           |                                         | 9 (3-20)             |                           | 4 (1-8)                      |                                   |

Spn = *Streptococcus pneumoniae*; npnm = non-pneumonia, non-meningitis; HIV = HIV-infected cases only; UR = uncertainty range

| Year | State     | Spn pneumonia deaths (UR) | Spn pneumonia deaths; HIV (UR) | Spn pneumonia mortality rate (UR) | Spn pneumonia mortality rate; HIV (UR) | Spn meningitis deaths (UR) | Spn meningitis deaths; HIV (UR) | Spn meningitis mortality rate (UR) | Spn meningitis mortality rate; HIV (UR) | Spn NPNM deaths (UR) | Spn NPNM deaths; HIV (UR) | Spn NPNM mortality rate (UR) | Spn NPNM mortality rate; HIV (UR) |
|------|-----------|---------------------------|--------------------------------|-----------------------------------|----------------------------------------|----------------------------|---------------------------------|------------------------------------|-----------------------------------------|----------------------|---------------------------|------------------------------|-----------------------------------|
| 2003 | Manipur   | 69 (49-72)                |                                | 28 (20-29)                        |                                        | 10 (2-26)                  |                                 | 4 (1-11)                           |                                         | 9 (2-23)             |                           | 4 (1-9)                      |                                   |
| 2004 | Manipur   | 66 (47-69)                |                                | 26 (19-27)                        |                                        | 10 (2-25)                  |                                 | 4 (1-10)                           |                                         | 8 (2-22)             |                           | 3 (1-9)                      |                                   |
| 2005 | Manipur   | 65 (46-67)                |                                | 25 (18-26)                        |                                        | 9 (2-24)                   |                                 | 4 (1-10)                           |                                         | 8 (2-22)             |                           | 3 (1-8)                      |                                   |
| 2006 | Manipur   | 63 (45-66)                |                                | 24 (17-25)                        |                                        | 9 (2-24)                   |                                 | 3 (1-9)                            |                                         | 8 (2-21)             |                           | 3 (1-8)                      |                                   |
| 2007 | Manipur   | 63 (45-65)                |                                | 23 (17-24)                        |                                        | 9 (2-24)                   |                                 | 3 (1-9)                            |                                         | 8 (2-21)             |                           | 3 (1-8)                      |                                   |
| 2008 | Manipur   | 63 (45-66)                |                                | 23 (16-24)                        |                                        | 9 (2-24)                   |                                 | 3 (1-9)                            |                                         | 8 (2-21)             |                           | 3 (1-8)                      |                                   |
| 2009 | Manipur   | 63 (45-66)                |                                | 23 (16-24)                        |                                        | 9 (2-24)                   |                                 | 3 (1-9)                            |                                         | 8 (2-21)             |                           | 3 (1-8)                      |                                   |
| 2010 | Manipur   | 64 (45-66)                |                                | 23 (16-24)                        |                                        | 9 (2-24)                   |                                 | 3 (1-9)                            |                                         | 8 (2-21)             |                           | 3 (1-8)                      |                                   |
| 2011 | Manipur   | 64 (45-67)                |                                | 22 (16-23)                        |                                        | 9 (2-24)                   |                                 | 3 (1-8)                            |                                         | 8 (2-21)             |                           | 3 (1-7)                      |                                   |
| 2012 | Manipur   | 63 (45-66)                |                                | 22 (16-23)                        |                                        | 9 (2-24)                   |                                 | 3 (1-8)                            |                                         | 8 (2-21)             |                           | 3 (1-7)                      |                                   |
| 2013 | Manipur   | 63 (45-65)                |                                | 21 (15-22)                        |                                        | 9 (3-23)                   |                                 | 3 (1-8)                            |                                         | 8 (2-21)             |                           | 3 (1-7)                      |                                   |
| 2014 | Manipur   | 61 (43-64)                |                                | 21 (15-21)                        |                                        | 9 (2-23)                   |                                 | 3 (1-8)                            |                                         | 8 (2-20)             |                           | 3 (1-7)                      |                                   |
| 2015 | Manipur   | 59 (42-61)                | 1 (1-1)                        | 20 (14-20)                        | 0 (0-0)                                | 9 (2-22)                   |                                 | 3 (1-7)                            | 0 (0-0)                                 | 8 (2-19)             | 0 (0-0)                   | 3 (1-6)                      | 0 (0-0)                           |
| 2000 | Meghalaya | 408 (290-426)             |                                | 113 (80-118)                      |                                        | 64 (32-119)                |                                 | 18 (9-33)                          |                                         | 20 (10-37)           |                           | 6 (3-10)                     |                                   |
| 2001 | Meghalaya | 425 (301-443)             |                                | 114 (81-119)                      |                                        | 67 (33-123)                |                                 | 18 (9-33)                          |                                         | 21 (10-39)           |                           | 6 (3-10)                     |                                   |
| 2002 | Meghalaya | 442 (313-461)             |                                | 116 (82-121)                      |                                        | 69 (34-128)                |                                 | 18 (9-34)                          |                                         | 22 (11-40)           |                           | 6 (3-11)                     |                                   |
| 2003 | Meghalaya | 458 (325-477)             |                                | 118 (83-123)                      |                                        | 72 (35-133)                |                                 | 18 (9-34)                          |                                         | 23 (11-42)           |                           | 6 (3-11)                     |                                   |
| 2004 | Meghalaya | 473 (335-493)             |                                | 119 (84-124)                      |                                        | 74 (37-137)                |                                 | 19 (9-35)                          |                                         | 23 (12-43)           |                           | 6 (3-11)                     |                                   |
| 2005 | Meghalaya | 487 (345-508)             |                                | 120 (85-125)                      |                                        | 77 (39-141)                |                                 | 19 (10-35)                         |                                         | 24 (12-44)           |                           | 6 (3-11)                     |                                   |
| 2006 | Meghalaya | 500 (354-521)             |                                | 120 (85-125)                      |                                        | 79 (41-144)                |                                 | 19 (10-35)                         |                                         | 25 (13-45)           |                           | 6 (3-11)                     |                                   |
| 2007 | Meghalaya | 511 (362-533)             |                                | 121 (85-126)                      |                                        | 81 (43-146)                |                                 | 19 (10-34)                         |                                         | 26 (13-46)           |                           | 6 (3-11)                     |                                   |
| 2008 | Meghalaya | 525 (372-547)             |                                | 122 (86-127)                      |                                        | 83 (44-150)                |                                 | 19 (10-35)                         |                                         | 26 (14-47)           |                           | 6 (3-11)                     |                                   |
| 2009 | Meghalaya | 530 (376-552)             |                                | 121 (86-126)                      |                                        | 83 (41-154)                |                                 | 19 (9-35)                          |                                         | 26 (13-48)           |                           | 6 (3-11)                     |                                   |
| 2010 | Meghalaya | 554 (393-578)             |                                | 124 (88-130)                      |                                        | 85 (41-163)                |                                 | 19 (9-37)                          |                                         | 27 (13-51)           |                           | 6 (3-11)                     |                                   |
| 2011 | Meghalaya | 573 (406-597)             |                                | 127 (90-132)                      |                                        | 87 (40-170)                |                                 | 19 (9-38)                          |                                         | 27 (12-54)           |                           | 6 (3-12)                     |                                   |
| 2012 | Meghalaya | 589 (417-614)             |                                | 129 (91-134)                      |                                        | 89 (39-177)                |                                 | 19 (9-39)                          |                                         | 28 (12-56)           |                           | 6 (3-12)                     |                                   |
| 2013 | Meghalaya | 612 (434-637)             |                                | 132 (94-138)                      |                                        | 92 (40-184)                |                                 | 20 (9-40)                          |                                         | 29 (13-58)           |                           | 6 (3-13)                     |                                   |
| 2014 | Meghalaya | 631 (447-657)             |                                | 135 (96-141)                      |                                        | 94 (41-190)                |                                 | 20 (9-41)                          |                                         | 30 (13-60)           |                           | 6 (3-13)                     |                                   |
| 2015 | Meghalaya | 653 (463-680)             | 9 (6-10)                       | 138 (98-143)                      | 2 (1-2)                                | 97 (43-196)                | 1 (1-3)                         | 21 (9-41)                          | 0 (0-1)                                 | 31 (13-62)           | 0 (0-1)                   | 6 (3-13)                     | 0 (0-0)                           |
| 2000 | Mizoram   | 129 (91-134)              |                                | 114 (81-119)                      |                                        | 19 (8-39)                  |                                 | 17 (7-35)                          |                                         | 6 (2-12)             |                           | 5 (2-11)                     |                                   |
| 2001 | Mizoram   | 124 (88-129)              |                                | 108 (76-112)                      |                                        | 18 (7-38)                  |                                 | 16 (6-33)                          |                                         | 6 (2-12)             |                           | 5 (2-10)                     |                                   |
| 2002 | Mizoram   | 122 (86-127)              |                                | 103 (73-108)                      |                                        | 18 (7-37)                  |                                 | 15 (6-32)                          |                                         | 6 (2-12)             |                           | 5 (2-10)                     |                                   |
| 2003 | Mizoram   | 120 (85-125)              |                                | 100 (71-104)                      |                                        | 18 (7-37)                  |                                 | 15 (6-31)                          |                                         | 6 (2-12)             |                           | 5 (2-10)                     |                                   |
| 2004 | Mizoram   | 119 (84-124)              |                                | 97 (69-101)                       |                                        | 17 (7-36)                  |                                 | 14 (6-30)                          |                                         | 5 (2-11)             |                           | 4 (2-9)                      |                                   |
| 2005 | Mizoram   | 117 (83-122)              |                                | 94 (67-98)                        |                                        | 17 (7-36)                  |                                 | 14 (6-29)                          |                                         | 5 (2-11)             |                           | 4 (2-9)                      |                                   |
| 2006 | Mizoram   | 116 (83-121)              |                                | 92 (65-96)                        |                                        | 17 (7-36)                  |                                 | 13 (6-28)                          |                                         | 5 (2-11)             |                           | 4 (2-9)                      |                                   |
| 2007 | Mizoram   | 116 (82-121)              |                                | 90 (64-94)                        |                                        | 17 (7-35)                  |                                 | 13 (6-27)                          |                                         | 5 (2-11)             |                           | 4 (2-9)                      |                                   |
| 2008 | Mizoram   | 115 (81-120)              |                                | 88 (62-92)                        |                                        | 17 (7-35)                  |                                 | 13 (5-27)                          |                                         | 5 (2-11)             |                           | 4 (2-8)                      |                                   |
| 2009 | Mizoram   | 114 (80-118)              |                                | 86 (61-90)                        |                                        | 17 (7-34)                  |                                 | 13 (5-26)                          |                                         | 5 (2-11)             |                           | 4 (2-8)                      |                                   |
| 2010 | Mizoram   | 112 (79-116)              |                                | 84 (59-87)                        |                                        | 17 (7-34)                  |                                 | 12 (5-25)                          |                                         | 5 (2-11)             |                           | 4 (2-8)                      |                                   |
| 2011 | Mizoram   | 112 (79-117)              |                                | 83 (58-86)                        |                                        | 17 (7-34)                  |                                 | 12 (5-25)                          |                                         | 5 (2-11)             |                           | 4 (2-8)                      |                                   |
| 2012 | Mizoram   | 110 (78-115)              |                                | 81 (58-85)                        |                                        | 16 (7-33)                  |                                 | 12 (5-24)                          |                                         | 5 (2-10)             |                           | 4 (2-8)                      |                                   |
| 2013 | Mizoram   | 110 (78-115)              |                                | 80 (57-84)                        |                                        | 16 (7-33)                  |                                 | 12 (5-24)                          |                                         | 5 (2-10)             |                           | 4 (2-8)                      |                                   |
| 2014 | Mizoram   | 108 (77-113)              |                                | 79 (56-82)                        |                                        | 16 (7-32)                  |                                 | 12 (5-24)                          |                                         | 5 (2-10)             |                           | 4 (2-7)                      |                                   |
| 2015 | Mizoram   | 106 (75-110)              | 1 (1-2)                        | 76 (54-79)                        | 1 (1-1)                                | 16 (6-33)                  | 0 (0-0)                         | 11 (4-23)                          | 0 (0-0)                                 | 5 (2-10)             | 0 (0-0)                   | 4 (2-7)                      | 0 (0-0)                           |
| 2000 | Nagaland  | 84 (60-88)                |                                | 39 (28-41)                        |                                        | 12 (4-27)                  |                                 | 6 (2-13)                           |                                         | 11 (4-24)            |                           | 5 (2-11)                     |                                   |
| 2001 | Nagaland  | 89 (63-93)                |                                | 42 (29-43)                        |                                        | 13 (4-28)                  |                                 | 6 (2-13)                           |                                         | 11 (4-25)            |                           | 5 (2-12)                     |                                   |
| 2002 | Nagaland  | 95 (68-99)                |                                | 44 (31-46)                        |                                        | 14 (5-30)                  |                                 | 6 (2-14)                           |                                         | 12 (4-27)            |                           | 6 (2-12)                     |                                   |
| 2003 | Nagaland  | 102 (72-106)              |                                | 47 (33-49)                        |                                        | 15 (5-32)                  |                                 | 7 (2-15)                           |                                         | 13 (5-29)            |                           | 6 (2-13)                     |                                   |
| 2004 | Nagaland  | 108 (76-112)              |                                | 49 (35-51)                        |                                        | 15 (5-34)                  |                                 | 7 (2-16)                           |                                         | 14 (5-30)            |                           | 6 (2-14)                     |                                   |
| 2005 | Nagaland  | 112 (79-117)              |                                | 51 (36-53)                        |                                        | 16 (5-36)                  |                                 | 7 (2-16)                           |                                         | 14 (5-32)            |                           | 6 (2-14)                     |                                   |
| 2006 | Nagaland  | 114 (81-119)              |                                | 52 (37-54)                        |                                        | 16 (5-37)                  |                                 | 7 (2-17)                           |                                         | 14 (5-33)            |                           | 6 (2-14)                     |                                   |
| 2007 | Nagaland  | 116 (82-121)              |                                | 53 (37-55)                        |                                        | 16 (5-37)                  |                                 | 7 (2-17)                           |                                         | 15 (5-33)            |                           | 6 (2-15)                     |                                   |
| 2008 | Nagaland  | 117 (83-122)              |                                | 53 (38-55)                        |                                        | 16 (5-38)                  |                                 | 7 (2-17)                           |                                         | 15 (5-34)            |                           | 6 (2-15)                     |                                   |
| 2009 | Nagaland  | 115 (81-120)              |                                | 52 (37-54)                        |                                        | 16 (5-37)                  |                                 | 7 (2-17)                           |                                         | 14 (4-33)            |                           | 6 (2-15)                     |                                   |
| 2010 | Nagaland  | 119 (85-124)              |                                | 54 (38-56)                        |                                        | 17 (5-39)                  |                                 | 8 (2-18)                           |                                         | 15 (4-35)            |                           | 7 (2-16)                     |                                   |
| 2011 | Nagaland  | 119 (84-124)              |                                | 54 (38-56)                        |                                        | 16 (5-39)                  |                                 | 7 (2-18)                           |                                         | 15 (4-35)            |                           | 7 (2-16)                     |                                   |
| 2012 | Nagaland  | 116 (82-121)              |                                | 53 (38-55)                        |                                        | 16 (5-38)                  |                                 | 7 (2-17)                           |                                         | 14 (4-34)            |                           | 7 (2-16)                     |                                   |
| 2013 | Nagaland  | 112 (80-117)              |                                | 52 (37-54)                        |                                        | 16 (4-37)                  |                                 | 7 (2-17)                           |                                         | 14 (4-33)            |                           | 7 (2-16)                     |                                   |
| 2014 | Nagaland  | 106 (75-110)              |                                | 49 (35-51)                        |                                        | 15 (4-35)                  |                                 | 7 (2-16)                           |                                         | 13 (4-31)            |                           | 6 (2-14)                     |                                   |
| 2015 | Nagaland  | 99 (70-103)               | 1 (1-1)                        | 46 (33-48)                        | 1 (0-1)                                | 14 (4-33)                  | 0 (0-0)                         | 6 (2-15)                           | 0 (0-0)                                 | 12 (3-29)            | 0 (0-0)                   | 6 (2-14)                     | 0 (0-0)                           |
| 2000 | Odisha    | 6170 (4375-6430)          |                                | 152 (108-158)                     |                                        | 932 (423-1838)             |                                 | 23 (10-45)                         |                                         | 293 (133-578)        |                           | 7 (3-14)                     |                                   |
| 2001 | Odisha    | 5830 (4134-6076)          |                                | 142 (101-148)                     |                                        | 881 (400-1737)             |                                 | 22 (10-42)                         |                                         | 277 (126-546)        |                           | 7 (3-13)                     |                                   |
| 2002 | Odisha    | 5488 (3891-5719)          |                                | 133 (95-139)                      |                                        | 829 (376-1635)             |                                 | 20 (9-40)                          |                                         | 261 (118-514)        |                           | 6 (3-13)                     |                                   |
| 2003 | Odisha    | 5182 (3674-5400)          |                                | 126 (89-131)                      |                                        | 782 (355-1544)             |                                 | 19 (9-37)                          |                                         | 246 (112-485)        |                           | 6 (3-12)                     |                                   |
| 2004 | Odisha    | 4878 (3459-5084)          |                                | 118 (84-123)                      |                                        | 736 (334-1453)             |                                 | 18 (8-35)                          |                                         | 231 (104-457)        |                           | 6 (3-11)                     |                                   |
| 2005 | Odisha    | 4592 (3256-4786)          |                                | 111 (79-116)                      |                                        | 692 (312-1371)             |                                 | 17 (8-33)                          |                                         | 218 (98-431)         |                           | 5 (2-10)                     |                                   |
| 2006 | Odisha    | 4318 (3062-4500)          |                                | 104 (74-109)                      |                                        | 650 (291-1291)             |                                 | 16 (7-31)                          |                                         | 204 (92-406)         |                           | 5 (2-10)                     |                                   |
| 2007 | Odisha    | 4021 (2851-4190)          |                                | 97 (69-101)                       |                                        | 604 (269-1204)             |                                 | 15 (6-29)                          |                                         | 190 (84-379)         |                           | 5 (2-9)                      |                                   |
| 2008 | Odisha    | 3746 (2656-3904)          |                                | 91 (64-95)                        |                                        | 562 (250-1122)             |                                 | 14 (6-27)                          |                                         | 177 (79-353)         |                           | 4 (2-9)                      |                                   |
| 2009 | Odisha    | 3462 (2455-3608)          |                                | 84 (60-88)                        |                                        | 518 (231-1037)             |                                 | 13 (6-25)                          |                                         | 163 (73-326)         |                           | 4 (2-8)                      |                                   |
| 2010 | Odisha    | 3198 (2268-3333)          |                                | 78 (56-81)                        |                                        | 477 (214-958)              |                                 | 12 (5-23)                          |                                         | 150 (67-301)         |                           | 4 (2-7)                      |                                   |
| 2011 | Odisha    | 2967 (2104-3092)          |                                | 73 (52-76)                        |                                        | 441 (173-914)              |                                 | 11 (4-22)                          |                                         | 132 (54-264)         |                           | 4 (2-7)                      |                                   |
| 2012 | Odisha    | 2725 (1932-2840)          |                                | 68 (48-70)                        |                                        | 404 (159-839)              |                                 | 10 (4-21)                          |                                         | 118 (48-236)         |                           | 4 (2-7)                      |                                   |
| 2013 | Odisha    | 2524 (1790-2631)          |                                | 63 (45-66)                        |                                        | 373 (147-778)              |                                 | 9 (4-19)                           |                                         | 104 (41-208)         |                           | 4 (2-7)                      |                                   |
| 2014 | Odisha    | 2306 (1635-2403)          |                                | 58 (41-61)                        |                                        | 340 (135-710)              |                                 | 8 (3-18)                           |                                         | 93 (37-186)          |                           | 4 (2-7)                      |                                   |
| 2015 | Odisha    | 2109 (1495-2198)          | 30 (21-31)                     | 54 (38-56)                        | 1 (1-1)                                | 311 (123-650)              | 5 (2-10)                        | 8 (3-17)                           | 0 (0-0)                                 | 277 (110-578)        | 4 (2-9)                   | 7 (3-15)                     | 0 (0-0)                           |
| 2000 | Punjab    | 1877 (1331-1956)          |                                | 77 (55-81)                        |                                        | 305 (160-539)              |                                 | 13 (7-22)                          |                                         | 272 (142-480)        |                           | 11 (6-20)                    |                                   |
| 2001 | Punjab    | 1752 (1242-1826)          |                                | 72 (51-75)                        |                                        | 285 (149-503)              |                                 | 12 (6-21)                          |                                         | 254 (133-448)        |                           | 10 (5-18)                    |                                   |
| 2002 | Punjab    | 1631 (1156-1699)          |                                | 67 (47-70)                        |                                        | 265 (139-468)              |                                 | 11 (6-19)                          |                                         | 236 (124-417)        |                           | 10 (5-17)                    |                                   |
| 2003 | Punjab    | 1518 (1075-1580)          |                                | 62 (44-65)                        |                                        | 247 (129-435)              |                                 | 10 (5-18)                          |                                         | 220 (115-388)        |                           | 9 (5-16)                     |                                   |
| 2004 | Punjab    | 1405 (996-1464)           |                                | 58 (41-60)                        |                                        | 230 (120-404)              |                                 | 9 (5-17)                           |                                         | 205 (107-359)        |                           | 8 (4-15)                     |                                   |
| 2005 | Punjab    | 1299 (921-1354)           |                                | 53 (38-56)                        |                                        | 215 (115-370)              |                                 | 8 (5-15)                           |                                         | 191 (103-330)        |                           | 8 (4-14)                     |                                   |
| 2006 | Punjab    | 1197 (849-1248)           |                                | 49 (35-51)                        |                                        | 200 (111-339)              |                                 | 8 (5-14)                           |                                         | 178 (99-301)         |                           | 7 (4-12)                     |                                   |
| 2007 | Punjab    | 1098 (779-1144)           |                                | 45 (32-47)                        |                                        | 185 (101-308)              |                                 | 8 (4-13)                           |                                         | 164 (90-274)         |                           | 7 (4-11)                     |                                   |
| 2008 | Punjab    | 1004 (712-1047)           |                                | 41 (29-43)                        |                                        | 170 (93-282)               |                                 | 7 (4-12)                           |                                         | 151 (82-251)         |                           | 6 (3-10)                     |                                   |
| 2009 | Punjab    | 912 (647-950)             |                                | 38 (27-39)                        |                                        | 154 (84-256)               |                                 | 6 (3-11)                           |                                         | 138 (75-228)         |                           | 6 (3-9)                      |                                   |

Spn = *Streptococcus pneumoniae*; npnm = non-pneumonia, non-meningitis; HIV = HIV-infected cases only; UR = uncertainty range

| Year | State           | Spn pneumonia deaths (UR) | Spn pneumonia deaths; HIV (UR) | Spn pneumonia mortality rate (UR) | Spn pneumonia mortality rate; HIV (UR) | Spn meningitis deaths (UR) | Spn meningitis deaths; HIV (UR) | Spn meningitis mortality rate (UR) | Spn meningitis mortality rate; HIV (UR) | Spn NPNM deaths (UR) | Spn NPNM deaths; HIV (UR) | Spn NPNM mortality rate (UR) | Spn NPNM mortality rate; HIV (UR) |
|------|-----------------|---------------------------|--------------------------------|-----------------------------------|----------------------------------------|----------------------------|---------------------------------|------------------------------------|-----------------------------------------|----------------------|---------------------------|------------------------------|-----------------------------------|
| 2010 | Punjab          | 827 (586-862)             |                                | 35 (24-38)                        |                                        | 140 (76-232)               |                                 | 6 (3-10)                           |                                         | 125 (68-207)         |                           | 5 (3-9)                      |                                   |
| 2011 | Punjab          | 752 (533-784)             |                                | 32 (22-33)                        |                                        | 128 (69-211)               |                                 | 5 (3-9)                            |                                         | 114 (62-188)         |                           | 5 (3-8)                      |                                   |
| 2012 | Punjab          | 679 (482-708)             |                                | 29 (20-30)                        |                                        | 116 (63-191)               |                                 | 5 (3-8)                            |                                         | 103 (56-170)         |                           | 4 (2-7)                      |                                   |
| 2013 | Punjab          | 624 (443-650)             |                                | 27 (19-28)                        |                                        | 108 (58-176)               |                                 | 5 (2-8)                            |                                         | 96 (51-156)          |                           | 4 (2-7)                      |                                   |
| 2014 | Punjab          | 574 (407-598)             |                                | 25 (18-26)                        |                                        | 101 (56-192)               |                                 | 4 (2-8)                            |                                         | 89 (50-171)          |                           | 4 (2-7)                      |                                   |
| 2015 | Punjab          | 540 (383-563)             | 8 (5-8)                        | 24 (17-25)                        | 0 (0-0)                                | 96 (53-180)                | 1 (1-3)                         | 4 (2-8)                            | 0 (0-0)                                 | 85 (47-160)          | 1 (1-2)                   | 4 (2-7)                      | 0 (0-0)                           |
| 2000 | Rajasthan       | 11109 (7977-11573)        |                                | 135 (96-141)                      |                                        | 1688 (770-3294)            |                                 | 21 (9-40)                          |                                         | 531 (245-1036)       |                           | 6 (3-13)                     |                                   |
| 2001 | Rajasthan       | 10645 (7549-11094)        |                                | 129 (91-134)                      |                                        | 1618 (746-3157)            |                                 | 20 (9-38)                          |                                         | 509 (235-993)        |                           | 6 (3-12)                     |                                   |
| 2002 | Rajasthan       | 10170 (7212-10599)        |                                | 122 (87-128)                      |                                        | 1547 (713-3016)            |                                 | 19 (9-36)                          |                                         | 486 (224-948)        |                           | 6 (3-11)                     |                                   |
| 2003 | Rajasthan       | 9640 (6836-10047)         |                                | 116 (82-121)                      |                                        | 1468 (676-2859)            |                                 | 18 (8-34)                          |                                         | 462 (213-899)        |                           | 6 (3-11)                     |                                   |
| 2004 | Rajasthan       | 9091 (6447-9475)          |                                | 109 (78-114)                      |                                        | 1388 (637-2696)            |                                 | 17 (8-32)                          |                                         | 436 (200-848)        |                           | 5 (2-10)                     |                                   |
| 2005 | Rajasthan       | 8532 (6050-8892)          |                                | 103 (73-107)                      |                                        | 1308 (612-2518)            |                                 | 16 (7-30)                          |                                         | 411 (193-792)        |                           | 5 (2-10)                     |                                   |
| 2006 | Rajasthan       | 7971 (5652-8307)          |                                | 96 (68-100)                       |                                        | 1226 (586-2341)            |                                 | 15 (7-28)                          |                                         | 385 (184-736)        |                           | 5 (2-9)                      |                                   |
| 2007 | Rajasthan       | 7405 (5251-7717)          |                                | 89 (63-93)                        |                                        | 1141 (558-2183)            |                                 | 14 (7-26)                          |                                         | 359 (175-680)        |                           | 4 (2-8)                      |                                   |
| 2008 | Rajasthan       | 6870 (4872-7160)          |                                | 83 (59-86)                        |                                        | 1058 (517-2007)            |                                 | 13 (6-24)                          |                                         | 333 (163-631)        |                           | 4 (2-8)                      |                                   |
| 2009 | Rajasthan       | 6350 (4503-6618)          |                                | 77 (55-80)                        |                                        | 975 (429-1904)             |                                 | 12 (5-23)                          |                                         | 868 (382-1695)       |                           | 11 (5-21)                    |                                   |
| 2010 | Rajasthan       | 5854 (4151-6101)          |                                | 71 (51-74)                        |                                        | 896 (396-1756)             |                                 | 11 (5-21)                          |                                         | 798 (352-1563)       |                           | 10 (4-19)                    |                                   |
| 2011 | Rajasthan       | 5389 (3821-5616)          |                                | 66 (47-69)                        |                                        | 823 (364-1616)             |                                 | 10 (4-20)                          |                                         | 733 (324-1439)       |                           | 9 (4-18)                     |                                   |
| 2012 | Rajasthan       | 4899 (3474-5105)          |                                | 61 (43-63)                        |                                        | 747 (331-1469)             |                                 | 9 (4-18)                           |                                         | 665 (295-1308)       |                           | 8 (4-16)                     |                                   |
| 2013 | Rajasthan       | 4514 (3201-4704)          |                                | 57 (40-59)                        |                                        | 686 (305-1354)             |                                 | 9 (4-17)                           |                                         | 613 (272-1205)       |                           | 8 (3-15)                     |                                   |
| 2014 | Rajasthan       | 4161 (2951-4337)          |                                | 53 (37-55)                        |                                        | 635 (281-1248)             |                                 | 8 (4-16)                           |                                         | 565 (250-1111)       |                           | 7 (3-14)                     |                                   |
| 2015 | Rajasthan       | 3912 (2774-4077)          | 55 (39-57)                     | 50 (35-52)                        | 1 (0-1)                                | 597 (264-1173)             | 9 (4-18)                        | 8 (3-15)                           | 0 (0-0)                                 | 531 (235-1044)       | 8 (4-16)                  | 7 (3-13)                     | 0 (0-0)                           |
| 2000 | Sikkim          | 31 (22-33)                |                                | 51 (36-54)                        |                                        | 5 (2-9)                    |                                 | 8 (4-15)                           |                                         | 4 (2-8)              |                           | 7 (3-14)                     |                                   |
| 2001 | Sikkim          | 29 (21-31)                |                                | 49 (35-51)                        |                                        | 5 (2-9)                    |                                 | 8 (3-15)                           |                                         | 4 (2-8)              |                           | 7 (3-13)                     |                                   |
| 2002 | Sikkim          | 27 (19-28)                |                                | 46 (33-48)                        |                                        | 4 (2-8)                    |                                 | 7 (3-14)                           |                                         | 4 (2-7)              |                           | 6 (3-12)                     |                                   |
| 2003 | Sikkim          | 25 (18-26)                |                                | 43 (31-45)                        |                                        | 4 (2-7)                    |                                 | 7 (3-13)                           |                                         | 3 (2-7)              |                           | 6 (3-12)                     |                                   |
| 2004 | Sikkim          | 23 (16-24)                |                                | 41 (29-42)                        |                                        | 3 (2-7)                    |                                 | 6 (3-12)                           |                                         | 3 (1-6)              |                           | 5 (3-11)                     |                                   |
| 2005 | Sikkim          | 21 (15-22)                |                                | 38 (27-40)                        |                                        | 3 (1-6)                    |                                 | 6 (2-12)                           |                                         | 3 (1-8)              |                           | 5 (2-10)                     |                                   |
| 2006 | Sikkim          | 19 (14-20)                |                                | 36 (25-37)                        |                                        | 3 (1-6)                    |                                 | 5 (2-11)                           |                                         | 3 (1-5)              |                           | 5 (2-10)                     |                                   |
| 2007 | Sikkim          | 18 (12-18)                |                                | 34 (24-35)                        |                                        | 3 (1-6)                    |                                 | 5 (2-11)                           |                                         | 2 (1-5)              |                           | 4 (1-9)                      |                                   |
| 2008 | Sikkim          | 16 (12-17)                |                                | 32 (23-33)                        |                                        | 2 (1-5)                    |                                 | 5 (2-10)                           |                                         | 2 (1-5)              |                           | 4 (1-9)                      |                                   |
| 2009 | Sikkim          | 16 (11-16)                |                                | 31 (22-32)                        |                                        | 2 (1-5)                    |                                 | 5 (2-10)                           |                                         | 2 (1-4)              |                           | 4 (1-9)                      |                                   |
| 2010 | Sikkim          | 15 (11-16)                |                                | 31 (22-32)                        |                                        | 2 (1-5)                    |                                 | 5 (2-10)                           |                                         | 2 (1-4)              |                           | 4 (2-8)                      |                                   |
| 2011 | Sikkim          | 14 (10-15)                |                                | 31 (22-32)                        |                                        | 2 (1-4)                    |                                 | 5 (2-9)                            |                                         | 2 (1-4)              |                           | 4 (2-8)                      |                                   |
| 2012 | Sikkim          | 14 (10-14)                |                                | 30 (21-32)                        |                                        | 2 (1-4)                    |                                 | 5 (2-9)                            |                                         | 2 (1-4)              |                           | 4 (2-8)                      |                                   |
| 2013 | Sikkim          | 14 (10-14)                |                                | 31 (22-32)                        |                                        | 2 (1-5)                    |                                 | 5 (2-11)                           |                                         | 2 (1-4)              |                           | 4 (1-10)                     |                                   |
| 2014 | Sikkim          | 13 (9-14)                 |                                | 31 (22-32)                        |                                        | 2 (1-5)                    |                                 | 5 (2-11)                           |                                         | 2 (1-4)              |                           | 4 (1-10)                     |                                   |
| 2015 | Sikkim          | 13 (9-14)                 | 0 (0-0)                        | 31 (22-33)                        | 0 (0-0)                                | 2 (1-5)                    | 0 (0-0)                         | 5 (2-11)                           | 0 (0-0)                                 | 2 (1-4)              | 0 (0-0)                   | 4 (1-10)                     | 0 (0-0)                           |
| 2000 | Tamil Nadu      | 2795 (1982-2913)          |                                | 48 (34-50)                        |                                        | 431 (198-830)              |                                 | 7 (3-14)                           |                                         | 384 (177-739)        |                           | 7 (3-13)                     |                                   |
| 2001 | Tamil Nadu      | 2657 (1984-2769)          |                                | 46 (32-47)                        |                                        | 410 (188-790)              |                                 | 7 (3-14)                           |                                         | 365 (168-703)        |                           | 6 (3-12)                     |                                   |
| 2002 | Tamil Nadu      | 2514 (1783-2620)          |                                | 43 (30-45)                        |                                        | 388 (178-747)              |                                 | 7 (3-13)                           |                                         | 348 (159-665)        |                           | 6 (3-11)                     |                                   |
| 2003 | Tamil Nadu      | 2369 (1680-2469)          |                                | 40 (29-42)                        |                                        | 367 (168-704)              |                                 | 6 (3-12)                           |                                         | 326 (150-627)        |                           | 6 (3-11)                     |                                   |
| 2004 | Tamil Nadu      | 2220 (1574-2313)          |                                | 38 (27-39)                        |                                        | 345 (158-660)              |                                 | 6 (3-11)                           |                                         | 307 (140-587)        |                           | 5 (2-10)                     |                                   |
| 2005 | Tamil Nadu      | 2067 (1465-2154)          |                                | 35 (25-36)                        |                                        | 323 (153-610)              |                                 | 5 (3-10)                           |                                         | 288 (136-543)        |                           | 5 (2-9)                      |                                   |
| 2006 | Tamil Nadu      | 1915 (1358-1996)          |                                | 32 (23-34)                        |                                        | 301 (147-561)              |                                 | 5 (2-9)                            |                                         | 268 (131-499)        |                           | 5 (2-8)                      |                                   |
| 2007 | Tamil Nadu      | 1762 (1250-1837)          |                                | 30 (21-31)                        |                                        | 279 (141-512)              |                                 | 5 (2-9)                            |                                         | 248 (126-456)        |                           | 4 (2-8)                      |                                   |
| 2008 | Tamil Nadu      | 1623 (1151-1691)          |                                | 27 (19-28)                        |                                        | 257 (130-471)              |                                 | 4 (2-8)                            |                                         | 229 (116-420)        |                           | 4 (2-7)                      |                                   |
| 2009 | Tamil Nadu      | 1491 (1057-1554)          |                                | 25 (18-26)                        |                                        | 236 (116-436)              |                                 | 4 (2-7)                            |                                         | 210 (103-388)        |                           | 4 (2-7)                      |                                   |
| 2010 | Tamil Nadu      | 1369 (971-1427)           |                                | 23 (16-24)                        |                                        | 216 (103-402)              |                                 | 4 (2-7)                            |                                         | 193 (92-358)         |                           | 3 (2-6)                      |                                   |
| 2011 | Tamil Nadu      | 1258 (892-1311)           |                                | 21 (15-22)                        |                                        | 198 (77-448)               |                                 | 3 (1-7)                            |                                         | 177 (68-399)         |                           | 3 (1-7)                      |                                   |
| 2012 | Tamil Nadu      | 1145 (812-1193)           |                                | 20 (14-20)                        |                                        | 180 (67-410)               |                                 | 3 (1-7)                            |                                         | 160 (59-365)         |                           | 3 (1-6)                      |                                   |
| 2013 | Tamil Nadu      | 1055 (748-1099)           |                                | 18 (13-19)                        |                                        | 166 (62-377)               |                                 | 3 (1-7)                            |                                         | 148 (55-336)         |                           | 3 (1-6)                      |                                   |
| 2014 | Tamil Nadu      | 972 (689-1013)            |                                | 17 (12-18)                        |                                        | 153 (57-348)               |                                 | 3 (1-6)                            |                                         | 136 (50-310)         |                           | 2 (1-5)                      |                                   |
| 2015 | Tamil Nadu      | 926 (656-965)             | 13 (9-14)                      | 16 (11-17)                        | 0 (0-0)                                | 145 (54-331)               | 2 (1-5)                         | 3 (1-6)                            | 0 (0-0)                                 | 129 (48-295)         | 2 (1-4)                   | 2 (1-5)                      | 0 (0-0)                           |
| 2000 | Tripura         | 160 (113-167)             |                                | 48 (34-50)                        |                                        | 24 (9-49)                  |                                 | 7 (3-15)                           |                                         | 21 (8-44)            |                           | 6 (2-13)                     |                                   |
| 2001 | Tripura         | 144 (102-150)             |                                | 43 (30-45)                        |                                        | 21 (8-45)                  |                                 | 6 (2-13)                           |                                         | 19 (7-40)            |                           | 6 (2-12)                     |                                   |
| 2002 | Tripura         | 131 (93-137)              |                                | 38 (27-40)                        |                                        | 19 (8-41)                  |                                 | 6 (2-12)                           |                                         | 17 (7-36)            |                           | 5 (2-11)                     |                                   |
| 2003 | Tripura         | 119 (85-124)              |                                | 35 (25-36)                        |                                        | 18 (7-37)                  |                                 | 5 (2-11)                           |                                         | 16 (6-33)            |                           | 5 (2-10)                     |                                   |
| 2004 | Tripura         | 108 (77-113)              |                                | 31 (22-33)                        |                                        | 16 (6-34)                  |                                 | 5 (2-10)                           |                                         | 14 (6-30)            |                           | 4 (2-9)                      |                                   |
| 2005 | Tripura         | 100 (71-104)              |                                | 29 (20-30)                        |                                        | 15 (6-31)                  |                                 | 4 (2-9)                            |                                         | 13 (5-27)            |                           | 4 (2-8)                      |                                   |
| 2006 | Tripura         | 92 (65-96)                |                                | 26 (19-27)                        |                                        | 14 (6-28)                  |                                 | 4 (2-8)                            |                                         | 12 (5-25)            |                           | 3 (1-7)                      |                                   |
| 2007 | Tripura         | 87 (61-90)                |                                | 24 (17-25)                        |                                        | 13 (6-26)                  |                                 | 4 (2-7)                            |                                         | 12 (5-23)            |                           | 3 (1-7)                      |                                   |
| 2008 | Tripura         | 80 (57-84)                |                                | 22 (16-23)                        |                                        | 12 (5-24)                  |                                 | 3 (1-7)                            |                                         | 11 (5-22)            |                           | 3 (1-6)                      |                                   |
| 2009 | Tripura         | 75 (53-78)                |                                | 21 (15-22)                        |                                        | 12 (5-22)                  |                                 | 3 (1-6)                            |                                         | 10 (5-20)            |                           | 3 (1-6)                      |                                   |
| 2010 | Tripura         | 71 (50-74)                |                                | 20 (14-20)                        |                                        | 11 (5-21)                  |                                 | 3 (1-6)                            |                                         | 10 (5-18)            |                           | 3 (1-5)                      |                                   |
| 2011 | Tripura         | 66 (47-69)                |                                | 18 (13-19)                        |                                        | 11 (5-19)                  |                                 | 3 (1-5)                            |                                         | 9 (5-17)             |                           | 3 (1-5)                      |                                   |
| 2012 | Tripura         | 60 (43-63)                |                                | 17 (12-18)                        |                                        | 10 (5-17)                  |                                 | 3 (1-5)                            |                                         | 8 (5-15)             |                           | 3 (1-4)                      |                                   |
| 2013 | Tripura         | 54 (38-57)                |                                | 15 (11-16)                        |                                        | 9 (5-16)                   |                                 | 2 (1-4)                            |                                         | 8 (4-14)             |                           | 2 (1-4)                      |                                   |
| 2014 | Tripura         | 47 (34-49)                |                                | 13 (9-14)                         |                                        | 8 (4-16)                   |                                 | 2 (1-5)                            |                                         | 7 (3-14)             |                           | 2 (1-4)                      |                                   |
| 2015 | Tripura         | 41 (29-42)                | 1 (0-1)                        | 11 (8-12)                         | 0 (0-0)                                | 7 (3-14)                   | 0 (0-0)                         | 2 (1-4)                            | 0 (0-0)                                 | 6 (3-12)             | 0 (0-0)                   | 2 (1-3)                      | 0 (0-0)                           |
| 2000 | Union Territory | 105 (75-110)              |                                | 36 (27-40)                        |                                        | 17 (8-32)                  |                                 | 6 (3-12)                           |                                         | 15 (7-29)            |                           | 5 (3-10)                     |                                   |
| 2001 | Union Territory | 100 (71-104)              |                                | 36 (25-37)                        |                                        | 16 (8-31)                  |                                 | 6 (3-10)                           |                                         | 14 (7-27)            |                           | 5 (2-10)                     |                                   |
| 2002 | Union Territory | 95 (67-99)                |                                | 33 (24-35)                        |                                        | 15 (7-29)                  |                                 | 5 (3-10)                           |                                         | 14 (6-26)            |                           | 5 (2-9)                      |                                   |
| 2003 | Union Territory | 91 (64-95)                |                                | 32 (23-33)                        |                                        | 15 (7-29)                  |                                 | 5 (2-10)                           |                                         | 13 (6-26)            |                           | 5 (2-9)                      |                                   |
| 2004 | Union Territory | 87 (62-91)                |                                | 30 (21-31)                        |                                        | 14 (6-28)                  |                                 | 5 (2-10)                           |                                         | 13 (6-25)            |                           | 4 (2-9)                      |                                   |
| 2005 | Union Territory | 82 (58-86)                |                                | 28 (20-30)                        |                                        | 14 (6-26)                  |                                 | 5 (2-9)                            |                                         | 12 (6-23)            |                           | 4 (2-8)                      |                                   |
| 2006 | Union Territory | 78 (55-82)                |                                | 27 (19-28)                        |                                        | 13 (7-25)                  |                                 | 5 (2-8)                            |                                         | 12 (6-22)            |                           | 4 (2-7)                      |                                   |
| 2007 | Union Territory | 74 (53-77)                |                                | 25 (18-26)                        |                                        | 13 (7-23)                  |                                 | 4 (3-8)                            |                                         | 12 (7-21)            |                           | 4 (2-7)                      |                                   |
| 2008 | Union Territory | 71 (51-74)                |                                | 24 (17-25)                        |                                        | 13 (7-22)                  |                                 | 4 (2-8)                            |                                         | 11 (6-20)            |                           | 4 (2-7)                      |                                   |
| 2009 | Union Territory | 68 (45-70)                |                                | 23 (16-24)                        |                                        | 12 (7-21)                  |                                 | 4 (2-7)                            |                                         | 11 (6-19)            |                           | 4 (2-6)                      |                                   |
| 2010 | Union Territory | 65 (46-68)                |                                | 22 (16-23)                        |                                        | 12 (6-20)                  |                                 | 4 (2-7)                            |                                         | 11 (6-18)            |                           | 4 (2-7)                      |                                   |
| 2011 | Union Territory | 63 (45-66)                |                                | 21 (15-22)                        |                                        | 12 (6-20)                  |                                 | 4 (2-7)                            |                                         | 10 (6-18)            |                           | 4 (2-6)                      |                                   |
| 2012 | Union Territory | 60 (43-62)                |                                | 20 (14-21)                        |                                        | 11 (6-20)                  |                                 | 4 (2-7)                            |                                         | 10 (5-17)            |                           | 4 (2-6)                      |                                   |
| 2013 | Union Territory | 58 (41-60)                |                                | 20 (14-21)                        |                                        | 11 (5-19)                  |                                 | 4 (2-6)                            |                                         | 9 (5-17)             |                           | 3 (2-6)                      |                                   |
| 2014 | Union Territory | 54 (38-57)                |                                | 19 (13-19)                        |                                        | 10 (5-18)                  |                                 | 3 (2-6)                            |                                         | 9 (4-16)             |                           | 3 (2-5)                      |                                   |
| 2015 | Union Territory | 50 (36-53)                | 1 (1-1)                        | 17 (12-18)                        | 0 (0-0)                                | 9 (5-16)                   | 0 (0-0)                         | 3 (2-6)                            | 0 (0-0)                                 | 8 (4-14)             | 0 (0-0)                   | 3 (1-5)                      | 0 (0-0)                           |
| 2000 | Uttar Pradesh   | 39399 (27938-41059)       |                                | 167 (118-174)                     |                                        | 6218 (3122-11386)          |                                 | 28 (13-48)                         |                                         | 1955 (981-3580)      |                           | 8 (4-15)                     |                                   |

Spn = *Streptococcus pneumoniae*; npnm = non-pneumonia, non-meningitis; HIV = HIV-infected cases only; UR = uncertainty range

| Year | State         | Spn pneumonia deaths (UR) | Spn pneumonia deaths; HIV (UR) | Spn pneumonia mortality rate (UR) | Spn pneumonia mortality rate; HIV (UR) | Spn meningitis deaths (UR) | Spn meningitis deaths; HIV (UR) | Spn meningitis mortality rate (UR) | Spn meningitis mortality rate; HIV (UR) | Spn NPnm deaths (UR) | Spn NPnm deaths; HIV (UR) | Spn NPnm mortality rate (UR) | Spn NPnm mortality rate; HIV (UR) |
|------|---------------|---------------------------|--------------------------------|-----------------------------------|----------------------------------------|----------------------------|---------------------------------|------------------------------------|-----------------------------------------|----------------------|---------------------------|------------------------------|-----------------------------------|
| 2001 | Uttar Pradesh | 37800 (26804-39394)       |                                | 159 (113-168)                     |                                        | 5966 (2995-10924)          |                                 | 25 (13-46)                         |                                         | 1878 (842-3434)      |                           | 8 (4-14)                     |                                   |
| 2002 | Uttar Pradesh | 36166 (25645-37690)       |                                | 152 (108-159)                     |                                        | 5707 (2866-10451)          |                                 | 24 (12-44)                         |                                         | 1794 (801-3286)      |                           | 8 (4-14)                     |                                   |
| 2003 | Uttar Pradesh | 34518 (24477-35975)       |                                | 146 (103-152)                     |                                        | 5442 (2735-9975)           |                                 | 23 (12-42)                         |                                         | 1711 (860-3136)      |                           | 7 (4-13)                     |                                   |
| 2004 | Uttar Pradesh | 32809 (23265-34192)       |                                | 139 (98-145)                      |                                        | 5165 (2600-9481)           |                                 | 22 (11-40)                         |                                         | 1624 (817-2981)      |                           | 7 (3-13)                     |                                   |
| 2005 | Uttar Pradesh | 31019 (21996-32327)       |                                | 132 (93-137)                      |                                        | 4871 (2426-8989)           |                                 | 21 (10-38)                         |                                         | 1532 (763-2826)      |                           | 6 (3-12)                     |                                   |
| 2006 | Uttar Pradesh | 29257 (20746-30490)       |                                | 124 (88-130)                      |                                        | 4583 (2260-8501)           |                                 | 19 (10-36)                         |                                         | 1441 (710-2673)      |                           | 6 (3-11)                     |                                   |
| 2007 | Uttar Pradesh | 27438 (19456-28595)       |                                | 117 (83-122)                      |                                        | 4288 (2033-7994)           |                                 | 18 (9-34)                          |                                         | 1348 (658-2513)      |                           | 6 (3-11)                     |                                   |
| 2008 | Uttar Pradesh | 25658 (18194-26739)       |                                | 110 (78-115)                      |                                        | 4000 (1957-7475)           |                                 | 17 (8-32)                          |                                         | 1258 (615-2350)      |                           | 5 (3-10)                     |                                   |
| 2009 | Uttar Pradesh | 23907 (16952-24914)       |                                | 103 (73-108)                      |                                        | 3716 (1823-6965)           |                                 | 16 (8-30)                          |                                         | 1168 (573-2190)      |                           | 5 (2-9)                      |                                   |
| 2010 | Uttar Pradesh | 22191 (15735-23126)       |                                | 97 (69-101)                       |                                        | 3438 (1693-6465)           |                                 | 15 (7-28)                          |                                         | 1081 (532-2033)      |                           | 5 (2-9)                      |                                   |
| 2011 | Uttar Pradesh | 20556 (14576-21423)       |                                | 91 (64-94)                        |                                        | 3170 (1411-6146)           |                                 | 14 (6-27)                          |                                         | 2822 (1256-5471)     |                           | 12 (6-24)                    |                                   |
| 2012 | Uttar Pradesh | 18786 (13321-19578)       |                                | 84 (59-87)                        |                                        | 2887 (1290-5617)           |                                 | 11 (5-22)                          |                                         | 2570 (1148-5000)     |                           | 11 (5-22)                    |                                   |
| 2013 | Uttar Pradesh | 17334 (12292-18065)       |                                | 78 (56-82)                        |                                        | 2658 (1190-5182)           |                                 | 12 (5-23)                          |                                         | 2366 (1060-4614)     |                           | 11 (5-21)                    |                                   |
| 2014 | Uttar Pradesh | 15889 (11287-16558)       |                                | 73 (52-76)                        |                                        | 2433 (1091-4750)           |                                 | 11 (5-22)                          |                                         | 2166 (871-4229)      |                           | 10 (4-19)                    |                                   |
| 2015 | Uttar Pradesh | 14665 (10389-15283)       | 206 (146-214)                  | 68 (48-71)                        | 1 (1-1)                                | 2245 (1007-4384)           | 33 (15-65)                      | 10 (5-20)                          | 0 (0-0)                                 | 1999 (896-3903)      | 30 (13-58)                | 9 (4-18)                     | 0 (0-0)                           |
| 2000 | Uttarakhand   | 879 (624-917)             |                                | 84 (59-87)                        |                                        | 138 (69-254)               |                                 | 13 (7-24)                          |                                         | 43 (22-80)           |                           | 4 (2-8)                      |                                   |
| 2001 | Uttarakhand   | 842 (597-877)             |                                | 80 (57-83)                        |                                        | 132 (66-244)               |                                 | 13 (6-23)                          |                                         | 42 (21-77)           |                           | 4 (2-7)                      |                                   |
| 2002 | Uttarakhand   | 804 (570-837)             |                                | 76 (54-79)                        |                                        | 126 (63-232)               |                                 | 12 (6-22)                          |                                         | 39 (20-73)           |                           | 4 (2-7)                      |                                   |
| 2003 | Uttarakhand   | 765 (543-797)             |                                | 72 (51-75)                        |                                        | 119 (55-227)               |                                 | 11 (5-21)                          |                                         | 106 (49-202)         |                           | 10 (5-19)                    |                                   |
| 2004 | Uttarakhand   | 726 (515-756)             |                                | 69 (49-71)                        |                                        | 112 (52-215)               |                                 | 11 (5-20)                          |                                         | 99 (46-192)          |                           | 9 (4-18)                     |                                   |
| 2005 | Uttarakhand   | 685 (468-714)             |                                | 65 (46-68)                        |                                        | 104 (46-206)               |                                 | 10 (4-19)                          |                                         | 93 (41-183)          |                           | 9 (4-17)                     |                                   |
| 2006 | Uttarakhand   | 646 (458-673)             |                                | 61 (43-64)                        |                                        | 97 (41-196)                |                                 | 9 (4-19)                           |                                         | 87 (37-174)          |                           | 8 (3-16)                     |                                   |
| 2007 | Uttarakhand   | 606 (429-631)             |                                | 57 (41-60)                        |                                        | 91 (37-185)                |                                 | 9 (3-18)                           |                                         | 81 (33-165)          |                           | 8 (3-16)                     |                                   |
| 2008 | Uttarakhand   | 567 (402-591)             |                                | 54 (38-56)                        |                                        | 85 (34-173)                |                                 | 8 (3-17)                           |                                         | 75 (30-154)          |                           | 7 (3-15)                     |                                   |
| 2009 | Uttarakhand   | 526 (373-549)             |                                | 50 (36-52)                        |                                        | 78 (32-161)                |                                 | 7 (3-15)                           |                                         | 70 (28-143)          |                           | 7 (3-14)                     |                                   |
| 2010 | Uttarakhand   | 485 (344-505)             |                                | 47 (33-49)                        |                                        | 72 (29-148)                |                                 | 7 (3-14)                           |                                         | 64 (26-132)          |                           | 6 (3-13)                     |                                   |
| 2011 | Uttarakhand   | 441 (313-460)             |                                | 43 (30-45)                        |                                        | 66 (27-135)                |                                 | 6 (3-13)                           |                                         | 58 (24-120)          |                           | 6 (2-12)                     |                                   |
| 2012 | Uttarakhand   | 392 (278-408)             |                                | 38 (27-40)                        |                                        | 58 (24-120)                |                                 | 6 (2-12)                           |                                         | 52 (21-107)          |                           | 5 (2-10)                     |                                   |
| 2013 | Uttarakhand   | 348 (247-363)             |                                | 35 (25-36)                        |                                        | 52 (21-107)                |                                 | 5 (2-11)                           |                                         | 46 (19-95)           |                           | 5 (2-9)                      |                                   |
| 2014 | Uttarakhand   | 307 (218-320)             |                                | 31 (22-32)                        |                                        | 46 (19-94)                 |                                 | 5 (2-9)                            |                                         | 41 (16-84)           |                           | 4 (2-8)                      |                                   |
| 2015 | Uttarakhand   | 272 (193-283)             | 4 (3-4)                        | 27 (19-29)                        | 0 (0-0)                                | 40 (16-83)                 | 1 (0-1)                         | 4 (2-8)                            | 0 (0-0)                                 | 36 (15-74)           | 1 (0-1)                   | 4 (1-7)                      | 0 (0-0)                           |
| 2000 | West Bengal   | 6561 (4652-6837)          |                                | 75 (53-79)                        |                                        | 1024 (485-1934)            |                                 | 12 (6-22)                          |                                         | 912 (432-1722)       |                           | 10 (5-20)                    |                                   |
| 2001 | West Bengal   | 5984 (4243-6236)          |                                | 69 (49-72)                        |                                        | 934 (443-1764)             |                                 | 11 (5-20)                          |                                         | 831 (394-1571)       |                           | 10 (5-18)                    |                                   |
| 2002 | West Bengal   | 5377 (3813-5604)          |                                | 62 (44-64)                        |                                        | 839 (398-1586)             |                                 | 10 (5-18)                          |                                         | 747 (354-1412)       |                           | 9 (4-16)                     |                                   |
| 2003 | West Bengal   | 4845 (3435-5049)          |                                | 56 (40-58)                        |                                        | 757 (358-1429)             |                                 | 9 (4-16)                           |                                         | 674 (319-1272)       |                           | 8 (4-15)                     |                                   |
| 2004 | West Bengal   | 4398 (3119-4584)          |                                | 51 (36-53)                        |                                        | 687 (325-1297)             |                                 | 8 (4-15)                           |                                         | 612 (290-1155)       |                           | 7 (3-13)                     |                                   |
| 2005 | West Bengal   | 4015 (2847-4184)          |                                | 47 (33-49)                        |                                        | 628 (300-1182)             |                                 | 7 (3-14)                           |                                         | 559 (267-1052)       |                           | 7 (3-12)                     |                                   |
| 2006 | West Bengal   | 3670 (2602-3824)          |                                | 43 (30-45)                        |                                        | 575 (276-1079)             |                                 | 7 (3-13)                           |                                         | 512 (246-960)        |                           | 6 (3-11)                     |                                   |
| 2007 | West Bengal   | 3348 (2374-3489)          |                                | 39 (28-41)                        |                                        | 526 (254-982)              |                                 | 6 (3-12)                           |                                         | 468 (226-875)        |                           | 6 (3-10)                     |                                   |
| 2008 | West Bengal   | 3023 (2144-3151)          |                                | 36 (25-37)                        |                                        | 476 (229-887)              |                                 | 6 (3-11)                           |                                         | 424 (204-790)        |                           | 5 (2-9)                      |                                   |
| 2009 | West Bengal   | 2709 (1921-2823)          |                                | 32 (23-34)                        |                                        | 427 (208-793)              |                                 | 5 (2-9)                            |                                         | 380 (185-706)        |                           | 5 (2-9)                      |                                   |
| 2010 | West Bengal   | 2502 (1774-2608)          |                                | 30 (21-32)                        |                                        | 396 (194-731)              |                                 | 5 (2-9)                            |                                         | 352 (173-651)        |                           | 4 (2-8)                      |                                   |
| 2011 | West Bengal   | 2388 (1694-2489)          |                                | 29 (21-30)                        |                                        | 378 (187-697)              |                                 | 5 (2-9)                            |                                         | 337 (167-620)        |                           | 4 (2-8)                      |                                   |
| 2012 | West Bengal   | 2284 (1619-2380)          |                                | 28 (20-30)                        |                                        | 363 (181-665)              |                                 | 5 (2-8)                            |                                         | 323 (161-592)        |                           | 4 (2-7)                      |                                   |
| 2013 | West Bengal   | 2261 (1603-2356)          |                                | 29 (20-30)                        |                                        | 359 (179-658)              |                                 | 5 (2-8)                            |                                         | 320 (159-586)        |                           | 4 (2-7)                      |                                   |
| 2014 | West Bengal   | 2255 (1599-2350)          |                                | 29 (20-30)                        |                                        | 359 (179-656)              |                                 | 5 (2-8)                            |                                         | 319 (159-584)        |                           | 4 (2-7)                      |                                   |
| 2015 | West Bengal   | 2280 (1617-2376)          | 32 (23-33)                     | 30 (21-31)                        | 0 (0-0)                                | 363 (181-664)              | 5 (3-10)                        | 5 (2-9)                            | 0 (0-0)                                 | 323 (161-591)        | 5 (2-9)                   | 4 (2-8)                      | 0 (0-0)                           |

Spn = *Streptococcus pneumoniae*; npnm = non-pneumonia, non-meningitis; HIV = HIV-infected cases only; UR = uncertainty range

Webappendix 10: Hib deaths in India by state, year, and HIV status

| Year | State             | Pneumonia deaths          |                                |                                   |                                        | Meningitis deaths          |                                 |                                    |                              | NPNM deaths          |                           |                              |                                   |
|------|-------------------|---------------------------|--------------------------------|-----------------------------------|----------------------------------------|----------------------------|---------------------------------|------------------------------------|------------------------------|----------------------|---------------------------|------------------------------|-----------------------------------|
|      |                   | Hib pneumonia deaths (UR) | Hib pneumonia deaths; HIV (UR) | Hib pneumonia mortality rate (UR) | Hib pneumonia mortality rate; HIV (UR) | Hib meningitis deaths (UR) | Hib meningitis deaths; HIV (UR) | Hib meningitis mortality rate (UR) | Hib mortality rate; HIV (UR) | Hib NPNM deaths (UR) | Hib NPNM deaths; HIV (UR) | Hib NPNM mortality rate (UR) | Hib NPNM mortality rate; HIV (UR) |
| 2000 | Andhra Pradesh    | 2768 (1947-3636)          |                                | 36 (25-47)                        |                                        | 942 (441-1396)             |                                 | 12 (6-18)                          |                              | 4 (2-6)              |                           | 0 (0-0)                      |                                   |
| 2001 | Andhra Pradesh    | 2714 (1909-3566)          |                                | 35 (25-47)                        |                                        | 924 (405-1396)             |                                 | 12 (5-18)                          |                              | 7 (3-11)             |                           | 0 (0-0)                      |                                   |
| 2002 | Andhra Pradesh    | 2639 (1856-3468)          |                                | 35 (24-45)                        |                                        | 898 (394-1357)             |                                 | 12 (5-18)                          |                              | 7 (3-11)             |                           | 0 (0-0)                      |                                   |
| 2003 | Andhra Pradesh    | 2551 (1794-3352)          |                                | 34 (24-44)                        |                                        | 868 (380-1312)             |                                 | 11 (5-17)                          |                              | 7 (3-10)             |                           | 0 (0-0)                      |                                   |
| 2004 | Andhra Pradesh    | 2447 (1721-3215)          |                                | 33 (23-43)                        |                                        | 833 (365-1258)             |                                 | 11 (5-17)                          |                              | 7 (3-10)             |                           | 0 (0-0)                      |                                   |
| 2005 | Andhra Pradesh    | 2327 (1636-3057)          |                                | 31 (22-41)                        |                                        | 792 (346-1198)             |                                 | 11 (5-16)                          |                              | 6 (3-10)             |                           | 0 (0-0)                      |                                   |
| 2006 | Andhra Pradesh    | 2206 (1552-2899)          |                                | 30 (21-39)                        |                                        | 752 (328-1137)             |                                 | 10 (4-15)                          |                              | 6 (3-9)              |                           | 0 (0-0)                      |                                   |
| 2007 | Andhra Pradesh    | 2065 (1452-2713)          |                                | 28 (20-37)                        |                                        | 704 (306-1065)             |                                 | 10 (4-14)                          |                              | 6 (2-8)              |                           | 0 (0-0)                      |                                   |
| 2008 | Andhra Pradesh    | 1924 (1353-2528)          |                                | 26 (19-35)                        |                                        | 657 (285-992)              |                                 | 9 (4-14)                           |                              | 5 (2-8)              |                           | 0 (0-0)                      |                                   |
| 2009 | Andhra Pradesh    | 1776 (1249-2334)          |                                | 25 (17-32)                        |                                        | 608 (259-924)              |                                 | 8 (4-13)                           |                              | 5 (2-7)              |                           | 0 (0-0)                      |                                   |
| 2010 | Andhra Pradesh    | 1616 (1137-2124)          |                                | 23 (16-30)                        |                                        | 554 (231-848)              |                                 | 8 (3-12)                           |                              | 4 (2-7)              |                           | 0 (0-0)                      |                                   |
| 2011 | Andhra Pradesh    | 1455 (1023-1912)          |                                | 21 (15-27)                        |                                        | 500 (204-769)              |                                 | 7 (3-11)                           |                              | 4 (2-6)              |                           | 0 (0-0)                      |                                   |
| 2012 | Andhra Pradesh    | 1291 (808-1697)           |                                | 19 (13-25)                        |                                        | 444 (178-698)              |                                 | 6 (3-10)                           |                              | 4 (1-5)              |                           | 0 (0-0)                      |                                   |
| 2013 | Andhra Pradesh    | 1158 (814-1521)           |                                | 17 (12-23)                        |                                        | 399 (160-617)              |                                 | 6 (2-9)                            |                              | 3 (1-5)              |                           | 0 (0-0)                      |                                   |
| 2014 | Andhra Pradesh    | 1042 (733-1369)           |                                | 16 (11-21)                        |                                        | 359 (144-555)              |                                 | 5 (2-8)                            |                              | 3 (1-4)              |                           | 0 (0-0)                      |                                   |
| 2015 | Andhra Pradesh    | 404 (284-530)             | 1 (1-1)                        | 6 (4-8)                           | 0 (0-0)                                | 139 (56-215)               | 0 (0-1)                         | 2 (1-3)                            | 0 (0-0)                      | 1 (0-2)              | 0 (0-0)                   | 0 (0-0)                      |                                   |
| 2000 | Arunachal Pradesh | 33 (23-43)                |                                | 21 (15-27)                        |                                        | 11 (4-18)                  |                                 | 7 (2-12)                           |                              | 0 (0-0)              |                           | 0 (0-0)                      |                                   |
| 2001 | Arunachal Pradesh | 31 (22-40)                |                                | 19 (14-26)                        |                                        | 11 (4-17)                  |                                 | 7 (2-11)                           |                              | 0 (0-0)              |                           | 0 (0-0)                      |                                   |
| 2002 | Arunachal Pradesh | 31 (22-40)                |                                | 19 (14-25)                        |                                        | 11 (4-17)                  |                                 | 7 (2-11)                           |                              | 0 (0-0)              |                           | 0 (0-0)                      |                                   |
| 2003 | Arunachal Pradesh | 31 (22-41)                |                                | 20 (14-26)                        |                                        | 11 (4-18)                  |                                 | 7 (2-11)                           |                              | 0 (0-0)              |                           | 0 (0-0)                      |                                   |
| 2004 | Arunachal Pradesh | 32 (22-41)                |                                | 20 (14-26)                        |                                        | 11 (4-18)                  |                                 | 7 (2-11)                           |                              | 0 (0-0)              |                           | 0 (0-0)                      |                                   |
| 2005 | Arunachal Pradesh | 32 (22-41)                |                                | 20 (14-26)                        |                                        | 11 (4-17)                  |                                 | 7 (2-11)                           |                              | 0 (0-0)              |                           | 0 (0-0)                      |                                   |
| 2006 | Arunachal Pradesh | 33 (23-44)                |                                | 21 (15-27)                        |                                        | 12 (5-18)                  |                                 | 7 (3-11)                           |                              | 0 (0-0)              |                           | 0 (0-0)                      |                                   |
| 2007 | Arunachal Pradesh | 32 (23-42)                |                                | 20 (14-26)                        |                                        | 11 (5-16)                  |                                 | 7 (3-10)                           |                              | 0 (0-0)              |                           | 0 (0-0)                      |                                   |
| 2008 | Arunachal Pradesh | 33 (23-43)                |                                | 20 (14-27)                        |                                        | 11 (5-17)                  |                                 | 7 (3-10)                           |                              | 0 (0-0)              |                           | 0 (0-0)                      |                                   |
| 2009 | Arunachal Pradesh | 33 (23-44)                |                                | 21 (15-27)                        |                                        | 12 (5-18)                  |                                 | 7 (3-11)                           |                              | 0 (0-0)              |                           | 0 (0-0)                      |                                   |
| 2010 | Arunachal Pradesh | 34 (24-44)                |                                | 21 (15-28)                        |                                        | 12 (4-18)                  |                                 | 7 (3-11)                           |                              | 0 (0-0)              |                           | 0 (0-0)                      |                                   |
| 2011 | Arunachal Pradesh | 33 (23-43)                |                                | 21 (15-27)                        |                                        | 12 (4-18)                  |                                 | 7 (3-12)                           |                              | 0 (0-0)              |                           | 0 (0-0)                      |                                   |
| 2012 | Arunachal Pradesh | 32 (23-42)                |                                | 20 (14-27)                        |                                        | 11 (4-18)                  |                                 | 7 (2-12)                           |                              | 0 (0-0)              |                           | 0 (0-0)                      |                                   |
| 2013 | Arunachal Pradesh | 32 (22-42)                |                                | 20 (14-27)                        |                                        | 11 (4-18)                  |                                 | 7 (2-11)                           |                              | 0 (0-0)              |                           | 0 (0-0)                      |                                   |
| 2014 | Arunachal Pradesh | 31 (22-41)                |                                | 20 (14-26)                        |                                        | 11 (4-18)                  |                                 | 7 (2-11)                           |                              | 0 (0-0)              |                           | 0 (0-0)                      |                                   |
| 2015 | Arunachal Pradesh | 28 (20-37)                | 0 (0-0)                        | 18 (13-24)                        | 0 (0-0)                                | 10 (3-16)                  | 0 (0-0)                         | 6 (2-10)                           | 0 (0-0)                      | 0 (0-0)              | 0 (0-0)                   | 0 (0-0)                      |                                   |
| 2000 | Assam             | 1754 (1234-2305)          |                                | 51 (36-67)                        |                                        | 612 (235-947)              |                                 | 18 (7-28)                          |                              | 2 (1-4)              |                           | 0 (0-0)                      |                                   |
| 2001 | Assam             | 1700 (1195-2233)          |                                | 49 (34-64)                        |                                        | 593 (228-917)              |                                 | 17 (7-26)                          |                              | 2 (1-4)              |                           | 0 (0-0)                      |                                   |
| 2002 | Assam             | 1662 (1169-2183)          |                                | 47 (33-62)                        |                                        | 580 (223-897)              |                                 | 17 (6-26)                          |                              | 2 (1-4)              |                           | 0 (0-0)                      |                                   |
| 2003 | Assam             | 1643 (1156-2159)          |                                | 47 (33-61)                        |                                        | 573 (220-887)              |                                 | 16 (6-25)                          |                              | 2 (1-4)              |                           | 0 (0-0)                      |                                   |
| 2004 | Assam             | 1638 (1152-2153)          |                                | 46 (33-61)                        |                                        | 571 (220-884)              |                                 | 16 (6-25)                          |                              | 2 (1-4)              |                           | 0 (0-0)                      |                                   |
| 2005 | Assam             | 1637 (1152-2152)          |                                | 46 (33-61)                        |                                        | 570 (222-880)              |                                 | 16 (6-25)                          |                              | 2 (1-4)              |                           | 0 (0-0)                      |                                   |
| 2006 | Assam             | 1639 (1152-2153)          |                                | 46 (32-60)                        |                                        | 570 (225-877)              |                                 | 16 (6-25)                          |                              | 2 (1-4)              |                           | 0 (0-0)                      |                                   |
| 2007 | Assam             | 1643 (1152-2158)          |                                | 46 (32-60)                        |                                        | 571 (228-876)              |                                 | 16 (6-24)                          |                              | 2 (1-4)              |                           | 0 (0-0)                      |                                   |
| 2008 | Assam             | 1650 (1160-2167)          |                                | 46 (32-60)                        |                                        | 573 (229-879)              |                                 | 16 (6-24)                          |                              | 2 (1-4)              |                           | 0 (0-0)                      |                                   |
| 2009 | Assam             | 1646 (1158-2162)          |                                | 46 (32-60)                        |                                        | 572 (229-877)              |                                 | 16 (6-24)                          |                              | 2 (1-4)              |                           | 0 (0-0)                      |                                   |
| 2010 | Assam             | 1644 (1157-2161)          |                                | 46 (32-60)                        |                                        | 571 (229-877)              |                                 | 16 (6-24)                          |                              | 2 (1-4)              |                           | 0 (0-0)                      |                                   |
| 2011 | Assam             | 1640 (1154-2155)          |                                | 46 (32-60)                        |                                        | 570 (228-874)              |                                 | 16 (6-24)                          |                              | 2 (1-4)              |                           | 0 (0-0)                      |                                   |
| 2012 | Assam             | 1625 (1143-2135)          |                                | 46 (32-60)                        |                                        | 565 (226-866)              |                                 | 16 (6-24)                          |                              | 2 (1-4)              |                           | 0 (0-0)                      |                                   |
| 2013 | Assam             | 1632 (1148-2144)          |                                | 46 (32-61)                        |                                        | 567 (227-870)              |                                 | 16 (6-25)                          |                              | 2 (1-4)              |                           | 0 (0-0)                      |                                   |
| 2014 | Assam             | 1621 (1140-2130)          |                                | 46 (32-61)                        |                                        | 563 (225-864)              |                                 | 16 (6-25)                          |                              | 2 (1-4)              |                           | 0 (0-0)                      |                                   |
| 2015 | Assam             | 568 (400-747)             | 1 (1-2)                        | 16 (11-21)                        | 0 (0-0)                                | 198 (72-312)               | 1 (0-1)                         | 6 (2-9)                            | 0 (0-0)                      | 2 (1-2)              | 0 (0-0)                   | 0 (0-0)                      |                                   |
| 2000 | Bihar             | 6762 (4756-8884)          |                                | 55 (39-72)                        |                                        | 2296 (1084-3403)           |                                 | 19 (9-28)                          |                              | 9 (4-14)             |                           | 0 (0-0)                      |                                   |
| 2001 | Bihar             | 6647 (4675-8733)          |                                | 53 (37-69)                        |                                        | 2257 (1066-3345)           |                                 | 18 (8-27)                          |                              | 9 (4-14)             |                           | 0 (0-0)                      |                                   |
| 2002 | Bihar             | 6495 (4569-8534)          |                                | 51 (36-67)                        |                                        | 2206 (1041-3268)           |                                 | 17 (8-25)                          |                              | 9 (4-13)             |                           | 0 (0-0)                      |                                   |
| 2003 | Bihar             | 6329 (4452-8316)          |                                | 49 (34-64)                        |                                        | 2150 (1015-3185)           |                                 | 17 (8-24)                          |                              | 9 (4-13)             |                           | 0 (0-0)                      |                                   |
| 2004 | Bihar             | 6145 (4322-8074)          |                                | 47 (33-61)                        |                                        | 2089 (985-3092)            |                                 | 16 (7-23)                          |                              | 9 (4-13)             |                           | 0 (0-0)                      |                                   |
| 2005 | Bihar             | 5947 (4183-7814)          |                                | 44 (31-58)                        |                                        | 2024 (946-3003)            |                                 | 15 (7-22)                          |                              | 8 (4-12)             |                           | 0 (0-0)                      |                                   |
| 2006 | Bihar             | 5752 (4046-7558)          |                                | 42 (30-56)                        |                                        | 1961 (848-2975)            |                                 | 14 (6-22)                          |                              | 16 (7-24)            |                           | 0 (0-0)                      |                                   |
| 2007 | Bihar             | 5532 (3891-7269)          |                                | 40 (28-53)                        |                                        | 1888 (808-2874)            |                                 | 14 (6-21)                          |                              | 15 (6-23)            |                           | 0 (0-0)                      |                                   |
| 2008 | Bihar             | 5297 (3726-6960)          |                                | 38 (27-50)                        |                                        | 1809 (774-2751)            |                                 | 13 (6-20)                          |                              | 14 (6-22)            |                           | 0 (0-0)                      |                                   |
| 2009 | Bihar             | 5025 (3534-6603)          |                                | 36 (25-47)                        |                                        | 1717 (734-2610)            |                                 | 12 (5-19)                          |                              | 14 (6-21)            |                           | 0 (0-0)                      |                                   |
| 2010 | Bihar             | 4716 (3317-6196)          |                                | 33 (23-44)                        |                                        | 1611 (689-2449)            |                                 | 11 (5-17)                          |                              | 13 (5-20)            |                           | 0 (0-0)                      |                                   |
| 2011 | Bihar             | 4367 (3071-5737)          |                                | 31 (22-40)                        |                                        | 1492 (638-2268)            |                                 | 10 (4-16)                          |                              | 12 (5-18)            |                           | 0 (0-0)                      |                                   |
| 2012 | Bihar             | 3961 (2786-5204)          |                                | 28 (20-36)                        |                                        | 1353 (579-2057)            |                                 | 9 (4-14)                           |                              | 11 (5-16)            |                           | 0 (0-0)                      |                                   |
| 2013 | Bihar             | 3599 (2531-4729)          |                                | 25 (18-33)                        |                                        | 1230 (526-1869)            |                                 | 9 (4-13)                           |                              | 10 (4-15)            |                           | 0 (0-0)                      |                                   |
| 2014 | Bihar             | 3212 (2259-4220)          |                                | 22 (16-29)                        |                                        | 1097 (469-1668)            |                                 | 8 (3-12)                           |                              | 9 (4-13)             |                           | 0 (0-0)                      |                                   |
| 2015 | Bihar             | 479 (337-629)             | 1 (1-2)                        | 3 (2-4)                           | 0 (0-0)                                | 164 (70-249)               | 0 (0-1)                         | 8 (2-12)                           | 0 (0-0)                      | 1 (1-2)              | 0 (0-0)                   | 0 (0-0)                      |                                   |
| 2000 | Chhattisgarh      | 1264 (889-1661)           |                                | 45 (32-60)                        |                                        | 440 (172-679)              |                                 | 16 (6-24)                          |                              | 2 (1-3)              |                           | 0 (0-0)                      |                                   |
| 2001 | Chhattisgarh      | 1252 (880-1644)           |                                | 45 (31-59)                        |                                        | 436 (170-672)              |                                 | 16 (6-24)                          |                              | 2 (1-3)              |                           | 0 (0-0)                      |                                   |
| 2002 | Chhattisgarh      | 1215 (855-1597)           |                                | 43 (30-57)                        |                                        | 423 (165-653)              |                                 | 15 (6-23)                          |                              | 2 (1-3)              |                           | 0 (0-0)                      |                                   |
| 2003 | Chhattisgarh      | 1176 (827-1545)           |                                | 41 (29-55)                        |                                        | 409 (160-632)              |                                 | 14 (6-22)                          |                              | 2 (1-3)              |                           | 0 (0-0)                      |                                   |
| 2004 | Chhattisgarh      | 1116 (785-1466)           |                                | 39 (28-52)                        |                                        | 388 (152-599)              |                                 | 14 (5-21)                          |                              | 2 (1-2)              |                           | 0 (0-0)                      |                                   |
| 2005 | Chhattisgarh      | 1061 (746-1394)           |                                | 37 (26-49)                        |                                        | 368 (149-564)              |                                 | 13 (5-20)                          |                              | 1 (1-2)              |                           | 0 (0-0)                      |                                   |
| 2006 | Chhattisgarh      | 1034 (727-1359)           |                                | 36 (25-48)                        |                                        | 358 (150-542)              |                                 | 13 (5-19)                          |                              | 1 (1-2)              |                           | 0 (0-0)                      |                                   |
| 2007 | Chhattisgarh      | 964 (678-1267)            |                                | 34 (24-44)                        |                                        | 333 (134-512)              |                                 | 12 (5-18)                          |                              | 3 (1-4)              |                           | 0 (0-0)                      |                                   |
| 2008 | Chhattisgarh      | 920 (647-1209)            |                                | 32 (23-42)                        |                                        | 317 (128-468)              |                                 | 11 (4-17)                          |                              | 3 (1-4)              |                           | 0 (0-0)                      |                                   |
| 2009 | Chhattisgarh      | 865 (609-1137)            |                                | 30 (21-40)                        |                                        | 298 (120-459)              |                                 | 10 (4-16)                          |                              | 2 (1-4)              |                           | 0 (0-0)                      |                                   |
| 2010 | Chhattisgarh      | 804 (566-1057)            |                                | 28 (20-37)                        |                                        | 277 (112-427)              |                                 | 10 (4-15)                          |                              | 2 (1-3)              |                           | 0 (0-0)                      |                                   |
| 2011 | Chhattisgarh      | 762 (536-1001)            |                                | 27 (19-35)                        |                                        | 262 (106-404)              |                                 | 9 (4-14)                           |                              | 2 (1-3)              |                           | 0 (0-0)                      |                                   |
| 2012 | Chhattisgarh      | 716 (503-941)             |                                | 25 (18-33)                        |                                        | 246 (100-380)              |                                 | 9 (4-14)                           |                              | 2 (1-3)              |                           | 0 (0-0)                      |                                   |
| 2013 | Chhattisgarh      | 698 (461-917)             |                                | 25 (18-33)                        |                                        | 240 (97-370)               |                                 | 9 (3-13)                           |                              | 2 (1-3)              |                           | 0 (0-0)                      |                                   |
| 2014 | Chhattisgarh      | 697 (490-915)             |                                | 25 (18-33)                        |                                        | 240 (97-370)               |                                 | 9 (4-13)                           |                              | 2 (1-3)              |                           | 0 (0-0)                      |                                   |
| 2015 | Chhattisgarh      | 224 (157-294)             | 1 (0-1)                        | 8 (6-11)                          | 0 (0-0)                                | 77 (31-119)                | 0 (0-0)                         | 3 (1-4)                            | 0 (0-0)                      | 1 (0-1)              | 0 (0-0)                   | 0 (0-0)                      |                                   |
| 2000 | Delhi             | 397 (279-521)             |                                | 25 (18-33)                        |                                        | 137 (53-214)               |                                 | 9 (3-14)                           |                              | 1 (0-2)              |                           | 0 (0-0)                      |                                   |
| 2001 | Delhi             | 384 (270-505)             |                                | 24 (17-32)                        |                                        | 133 (51-207)               |                                 | 8 (3-13)                           |                              | 1 (0-2)              |                           | 0 (0-0)                      |                                   |
| 2002 | Delhi             | 370 (261-487)             |                                | 23 (16-31)                        |                                        | 128 (50-200)               |                                 | 8 (3-13)                           |                              | 1 (0-2)              |                           | 0 (0-0)                      |                                   |
| 2003 | Delhi             | 356 (250-468)             |                                | 23 (16-30)                        |                                        | 123 (48-192)               |                                 | 8 (3-12)                           |                              | 1 (0-2)              |                           | 0 (0-0)                      |                                   |
| 2004 | Delhi             | 340 (239-447)             |                                | 22 (15-28)                        |                                        | 117 (46-183)               |                                 | 7 (3-12)                           |                              | 1 (0-1)              |                           | 0 (0-0)                      |                                   |

| Year | State            | Hib pneumonia deaths (UR) | Hib pneumonia deaths; HIV (UR) | Hib pneumonia mortality rate (UR) | Hib pneumonia mortality rate; HIV (UR) | Hib meningitis deaths (UR) | Hib meningitis deaths; HIV (UR) | Hib meningitis mortality rate (UR) | Hib mortality rate; HIV (UR) | Hib NPNM deaths (UR) | Hib NPNM deaths; HIV (UR) | Hib NPNM mortality rate (UR) | Hib NPNM mortality rate; HIV (UR) |
|------|------------------|---------------------------|--------------------------------|-----------------------------------|----------------------------------------|----------------------------|---------------------------------|------------------------------------|------------------------------|----------------------|---------------------------|------------------------------|-----------------------------------|
| 2005 | Delhi            | 323 (228-425)             |                                | 20 (14-27)                        |                                        | 111 (46-170)               |                                 | 7 (3-11)                           |                              | 1 (0-1)              |                           | 0 (0-0)                      |                                   |
| 2006 | Delhi            | 307 (216-403)             |                                | 19 (14-26)                        |                                        | 104 (47-155)               |                                 | 7 (3-10)                           |                              | 1 (0-1)              |                           | 0 (0-0)                      |                                   |
| 2007 | Delhi            | 288 (203-378)             |                                | 18 (13-24)                        |                                        | 97 (48-140)                |                                 | 6 (3-9)                            |                              | 1 (0-1)              |                           | 0 (0-0)                      |                                   |
| 2008 | Delhi            | 269 (190-354)             |                                | 17 (12-23)                        |                                        | 90 (45-131)                |                                 | 6 (3-8)                            |                              | 1 (0-1)              |                           | 0 (0-0)                      |                                   |
| 2009 | Delhi            | 250 (176-329)             |                                | 16 (11-21)                        |                                        | 83 (41-121)                |                                 | 5 (3-8)                            |                              | 1 (0-1)              |                           | 0 (0-0)                      |                                   |
| 2010 | Delhi            | 230 (162-302)             |                                | 15 (10-19)                        |                                        | 76 (38-111)                |                                 | 5 (2-7)                            |                              | 1 (0-1)              |                           | 0 (0-0)                      |                                   |
| 2011 | Delhi            | 208 (146-273)             |                                | 14 (10-18)                        |                                        | 68 (34-101)                |                                 | 4 (2-7)                            |                              | 1 (0-1)              |                           | 0 (0-0)                      |                                   |
| 2012 | Delhi            | 184 (130-242)             |                                | 12 (8-16)                         |                                        | 58 (34-101)                |                                 | 4 (1-6)                            |                              | 0 (0-1)              |                           | 0 (0-0)                      |                                   |
| 2013 | Delhi            | 84 (59-111)               |                                | 6 (4-7)                           |                                        | 26 (7-41)                  |                                 | 2 (0-3)                            |                              | 0 (0-0)              |                           | 0 (0-0)                      |                                   |
| 2014 | Delhi            | 14 (10-19)                |                                | 1 (1-1)                           |                                        | 4 (1-7)                    |                                 | 0 (0-0)                            |                              | 0 (0-0)              |                           | 0 (0-0)                      |                                   |
| 2015 | Delhi            | 12 (9-16)                 | 0 (0-0)                        | 1 (1-1)                           | 0 (0-0)                                | 4 (1-6)                    | 0 (0-0)                         | 0 (0-0)                            | 0 (0-0)                      | 0 (0-0)              | 0 (0-0)                   | 0 (0-0)                      | 0 (0-0)                           |
| 2000 | Goa              | 9 (6-11)                  |                                | 7 (5-9)                           |                                        | 3 (1-4)                    |                                 | 2 (1-4)                            |                              | 0 (0-0)              |                           | 0 (0-0)                      |                                   |
| 2001 | Goa              | 7 (5-9)                   |                                | 6 (4-8)                           |                                        | 2 (1-4)                    |                                 | 2 (0-3)                            |                              | 0 (0-0)              |                           | 0 (0-0)                      |                                   |
| 2002 | Goa              | 5 (4-7)                   |                                | 4 (3-6)                           |                                        | 2 (0-3)                    |                                 | 1 (0-2)                            |                              | 0 (0-0)              |                           | 0 (0-0)                      |                                   |
| 2003 | Goa              | 6 (4-8)                   |                                | 5 (4-7)                           |                                        | 2 (1-3)                    |                                 | 2 (0-3)                            |                              | 0 (0-0)              |                           | 0 (0-0)                      |                                   |
| 2004 | Goa              | 6 (5-9)                   |                                | 5 (4-7)                           |                                        | 2 (1-3)                    |                                 | 2 (0-3)                            |                              | 0 (0-0)              |                           | 0 (0-0)                      |                                   |
| 2005 | Goa              | 7 (5-9)                   |                                | 6 (4-7)                           |                                        | 2 (1-3)                    |                                 | 2 (0-3)                            |                              | 0 (0-0)              |                           | 0 (0-0)                      |                                   |
| 2006 | Goa              | 6 (4-8)                   |                                | 5 (4-7)                           |                                        | 2 (0-3)                    |                                 | 2 (0-3)                            |                              | 0 (0-0)              |                           | 0 (0-0)                      |                                   |
| 2007 | Goa              | 4 (3-5)                   |                                | 3 (2-4)                           |                                        | 1 (0-2)                    |                                 | 1 (0-2)                            |                              | 0 (0-0)              |                           | 0 (0-0)                      |                                   |
| 2008 | Goa              | 3 (2-4)                   |                                | 3 (2-4)                           |                                        | 1 (0-2)                    |                                 | 1 (0-2)                            |                              | 0 (0-0)              |                           | 0 (0-0)                      |                                   |
| 2009 | Goa              | 4 (3-5)                   |                                | 3 (2-4)                           |                                        | 1 (0-2)                    |                                 | 1 (0-2)                            |                              | 0 (0-0)              |                           | 0 (0-0)                      |                                   |
| 2010 | Goa              | 4 (3-5)                   |                                | 3 (2-4)                           |                                        | 1 (0-2)                    |                                 | 1 (0-2)                            |                              | 0 (0-0)              |                           | 0 (0-0)                      |                                   |
| 2011 | Goa              | 3 (2-4)                   |                                | 3 (2-3)                           |                                        | 1 (0-1)                    |                                 | 1 (0-1)                            |                              | 0 (0-0)              |                           | 0 (0-0)                      |                                   |
| 2012 | Goa              | 2 (1-3)                   |                                | 2 (1-2)                           |                                        | 1 (0-1)                    |                                 | 1 (0-1)                            |                              | 0 (0-0)              |                           | 0 (0-0)                      |                                   |
| 2013 | Goa              | 0 (0-0)                   |                                | 0 (0-0)                           |                                        | 0 (0-0)                    |                                 | 0 (0-0)                            |                              | 0 (0-0)              |                           | 0 (0-0)                      |                                   |
| 2014 | Goa              | 0 (0-0)                   |                                | 0 (0-0)                           |                                        | 0 (0-0)                    |                                 | 0 (0-0)                            |                              | 0 (0-0)              |                           | 0 (0-0)                      |                                   |
| 2015 | Goa              | 0 (0-0)                   | 0 (0-0)                        | 0 (0-0)                           | 0 (0-0)                                | 0 (0-0)                    | 0 (0-0)                         | 0 (0-0)                            | 0 (0-0)                      | 0 (0-0)              | 0 (0-0)                   | 0 (0-0)                      | 0 (0-0)                           |
| 2000 | Gujarat          | 2487 (1749-3268)          |                                | 42 (29-55)                        |                                        | 865 (342-1330)             |                                 | 14 (8-22)                          |                              | 4 (1-5)              |                           | 0 (0-0)                      |                                   |
| 2001 | Gujarat          | 2372 (1669-3117)          |                                | 39 (28-52)                        |                                        | 825 (327-1269)             |                                 | 14 (8-21)                          |                              | 3 (1-5)              |                           | 0 (0-0)                      |                                   |
| 2002 | Gujarat          | 2261 (1590-2971)          |                                | 37 (26-49)                        |                                        | 787 (311-1209)             |                                 | 13 (8-20)                          |                              | 3 (1-5)              |                           | 0 (0-0)                      |                                   |
| 2003 | Gujarat          | 2135 (1502-2805)          |                                | 35 (25-46)                        |                                        | 743 (269-1175)             |                                 | 12 (4-19)                          |                              | 6 (2-9)              |                           | 0 (0-0)                      |                                   |
| 2004 | Gujarat          | 1979 (1392-2600)          |                                | 32 (23-43)                        |                                        | 687 (250-1089)             |                                 | 11 (4-18)                          |                              | 5 (2-9)              |                           | 0 (0-0)                      |                                   |
| 2005 | Gujarat          | 1881 (1323-2472)          |                                | 31 (22-40)                        |                                        | 651 (249-1018)             |                                 | 11 (4-17)                          |                              | 5 (2-8)              |                           | 0 (0-0)                      |                                   |
| 2006 | Gujarat          | 1809 (1272-2376)          |                                | 29 (21-39)                        |                                        | 623 (252-959)              |                                 | 10 (4-16)                          |                              | 5 (2-8)              |                           | 0 (0-0)                      |                                   |
| 2007 | Gujarat          | 1691 (1190-2222)          |                                | 28 (19-36)                        |                                        | 580 (249-875)              |                                 | 9 (4-14)                           |                              | 5 (2-7)              |                           | 0 (0-0)                      |                                   |
| 2008 | Gujarat          | 1587 (1116-2085)          |                                | 26 (18-34)                        |                                        | 543 (234-821)              |                                 | 9 (4-13)                           |                              | 4 (2-7)              |                           | 0 (0-0)                      |                                   |
| 2009 | Gujarat          | 1477 (1039-1941)          |                                | 24 (17-32)                        |                                        | 504 (218-764)              |                                 | 8 (4-12)                           |                              | 4 (2-6)              |                           | 0 (0-0)                      |                                   |
| 2010 | Gujarat          | 1359 (956-1786)           |                                | 22 (16-29)                        |                                        | 464 (200-703)              |                                 | 8 (3-12)                           |                              | 4 (2-6)              |                           | 0 (0-0)                      |                                   |
| 2011 | Gujarat          | 1256 (883-1650)           |                                | 21 (15-27)                        |                                        | 429 (189-650)              |                                 | 7 (3-11)                           |                              | 3 (1-5)              |                           | 0 (0-0)                      |                                   |
| 2012 | Gujarat          | 1162 (817-1527)           |                                | 19 (14-25)                        |                                        | 397 (171-601)              |                                 | 7 (3-10)                           |                              | 3 (1-5)              |                           | 0 (0-0)                      |                                   |
| 2013 | Gujarat          | 406 (285-533)             |                                | 7 (5-9)                           |                                        | 138 (60-210)               |                                 | 2 (1-4)                            |                              | 1 (0-2)              |                           | 0 (0-0)                      |                                   |
| 2014 | Gujarat          | 132 (93-173)              |                                | 2 (2-3)                           |                                        | 45 (19-68)                 |                                 | 1 (0-1)                            |                              | 0 (0-1)              |                           | 0 (0-0)                      |                                   |
| 2015 | Gujarat          | 125 (88-165)              | 0 (0-0)                        | 2 (1-3)                           | 0 (0-0)                                | 43 (18-65)                 | 0 (0-0)                         | 1 (0-1)                            | 0 (0-0)                      | 0 (0-1)              | 0 (0-0)                   | 0 (0-0)                      | 0 (0-0)                           |
| 2000 | Haryana          | 1478 (1040-1942)          |                                | 57 (40-75)                        |                                        | 505 (229-754)              |                                 | 20 (9-29)                          |                              | 2 (1-3)              |                           | 0 (0-0)                      |                                   |
| 2001 | Haryana          | 1411 (993-1854)           |                                | 54 (38-71)                        |                                        | 482 (219-720)              |                                 | 19 (8-28)                          |                              | 2 (1-3)              |                           | 0 (0-0)                      |                                   |
| 2002 | Haryana          | 1338 (941-1758)           |                                | 51 (36-67)                        |                                        | 457 (208-683)              |                                 | 17 (8-26)                          |                              | 2 (1-3)              |                           | 0 (0-0)                      |                                   |
| 2003 | Haryana          | 1261 (887-1657)           |                                | 48 (34-63)                        |                                        | 430 (196-644)              |                                 | 16 (7-24)                          |                              | 2 (1-3)              |                           | 0 (0-0)                      |                                   |
| 2004 | Haryana          | 1177 (828-1547)           |                                | 45 (31-59)                        |                                        | 401 (170-614)              |                                 | 15 (6-23)                          |                              | 3 (1-5)              |                           | 0 (0-0)                      |                                   |
| 2005 | Haryana          | 1075 (756-1412)           |                                | 41 (29-53)                        |                                        | 365 (162-550)              |                                 | 14 (6-21)                          |                              | 3 (1-4)              |                           | 0 (0-0)                      |                                   |
| 2006 | Haryana          | 967 (680-1271)            |                                | 36 (26-48)                        |                                        | 327 (151-485)              |                                 | 12 (6-18)                          |                              | 3 (1-4)              |                           | 0 (0-0)                      |                                   |
| 2007 | Haryana          | 919 (646-1207)            |                                | 35 (24-45)                        |                                        | 309 (150-449)              |                                 | 12 (6-17)                          |                              | 2 (1-4)              |                           | 0 (0-0)                      |                                   |
| 2008 | Haryana          | 847 (596-1113)            |                                | 32 (22-42)                        |                                        | 284 (138-414)              |                                 | 11 (5-16)                          |                              | 2 (1-3)              |                           | 0 (0-0)                      |                                   |
| 2009 | Haryana          | 753 (530-989)             |                                | 28 (20-37)                        |                                        | 252 (122-370)              |                                 | 10 (5-14)                          |                              | 2 (1-3)              |                           | 0 (0-0)                      |                                   |
| 2010 | Haryana          | 726 (511-954)             |                                | 27 (19-36)                        |                                        | 243 (117-359)              |                                 | 9 (4-14)                           |                              | 2 (1-3)              |                           | 0 (0-0)                      |                                   |
| 2011 | Haryana          | 678 (477-891)             |                                | 26 (18-34)                        |                                        | 228 (108-337)              |                                 | 9 (4-13)                           |                              | 2 (1-3)              |                           | 0 (0-0)                      |                                   |
| 2012 | Haryana          | 591 (416-776)             |                                | 23 (16-30)                        |                                        | 199 (93-295)               |                                 | 8 (4-11)                           |                              | 2 (1-2)              |                           | 0 (0-0)                      |                                   |
| 2013 | Haryana          | 152 (107-199)             |                                | 6 (4-8)                           |                                        | 51 (24-76)                 |                                 | 2 (1-3)                            |                              | 0 (0-1)              |                           | 0 (0-0)                      |                                   |
| 2014 | Haryana          | 62 (44-81)                |                                | 2 (2-3)                           |                                        | 21 (10-31)                 |                                 | 1 (0-1)                            |                              | 0 (0-0)              |                           | 0 (0-0)                      |                                   |
| 2015 | Haryana          | 60 (42-79)                | 0 (0-0)                        | 2 (2-3)                           | 0 (0-0)                                | 20 (9-30)                  | 0 (0-0)                         | 1 (0-1)                            | 0 (0-0)                      | 0 (0-0)              | 0 (0-0)                   | 0 (0-0)                      | 0 (0-0)                           |
| 2000 | Himachal Pradesh | 262 (184-344)             |                                | 41 (29-54)                        |                                        | 89 (38-136)                |                                 | 14 (6-21)                          |                              | 1 (0-1)              |                           | 0 (0-0)                      |                                   |
| 2001 | Himachal Pradesh | 241 (169-316)             |                                | 38 (26-49)                        |                                        | 82 (35-125)                |                                 | 13 (5-20)                          |                              | 1 (0-1)              |                           | 0 (0-0)                      |                                   |
| 2002 | Himachal Pradesh | 221 (155-290)             |                                | 34 (24-45)                        |                                        | 75 (32-115)                |                                 | 12 (5-18)                          |                              | 1 (0-1)              |                           | 0 (0-0)                      |                                   |
| 2003 | Himachal Pradesh | 202 (142-266)             |                                | 32 (22-42)                        |                                        | 69 (29-105)                |                                 | 11 (5-16)                          |                              | 1 (0-1)              |                           | 0 (0-0)                      |                                   |
| 2004 | Himachal Pradesh | 186 (131-244)             |                                | 29 (21-38)                        |                                        | 63 (27-97)                 |                                 | 10 (4-15)                          |                              | 1 (0-1)              |                           | 0 (0-0)                      |                                   |
| 2005 | Himachal Pradesh | 170 (120-224)             |                                | 27 (19-35)                        |                                        | 58 (25-88)                 |                                 | 9 (4-14)                           |                              | 0 (0-1)              |                           | 0 (0-0)                      |                                   |
| 2006 | Himachal Pradesh | 156 (110-205)             |                                | 25 (17-32)                        |                                        | 53 (24-80)                 |                                 | 8 (4-13)                           |                              | 0 (0-1)              |                           | 0 (0-0)                      |                                   |
| 2007 | Himachal Pradesh | 143 (100-187)             |                                | 23 (16-30)                        |                                        | 48 (22-72)                 |                                 | 8 (4-11)                           |                              | 0 (0-1)              |                           | 0 (0-0)                      |                                   |
| 2008 | Himachal Pradesh | 131 (92-172)              |                                | 21 (15-28)                        |                                        | 44 (20-66)                 |                                 | 7 (3-11)                           |                              | 0 (0-1)              |                           | 0 (0-0)                      |                                   |
| 2009 | Himachal Pradesh | 120 (85-158)              |                                | 19 (14-26)                        |                                        | 40 (19-60)                 |                                 | 7 (3-10)                           |                              | 0 (0-0)              |                           | 0 (0-0)                      |                                   |
| 2010 | Himachal Pradesh | 110 (78-145)              |                                | 18 (13-24)                        |                                        | 37 (18-54)                 |                                 | 6 (3-9)                            |                              | 0 (0-0)              |                           | 0 (0-0)                      |                                   |
| 2011 | Himachal Pradesh | 102 (72-134)              |                                | 17 (12-22)                        |                                        | 34 (17-49)                 |                                 | 6 (3-8)                            |                              | 0 (0-0)              |                           | 0 (0-0)                      |                                   |
| 2012 | Himachal Pradesh | 94 (66-124)               |                                | 16 (11-21)                        |                                        | 31 (17-45)                 |                                 | 5 (3-8)                            |                              | 0 (0-0)              |                           | 0 (0-0)                      |                                   |
| 2013 | Himachal Pradesh | 91 (64-119)               |                                | 15 (11-20)                        |                                        | 30 (16-43)                 |                                 | 5 (3-7)                            |                              | 0 (0-0)              |                           | 0 (0-0)                      |                                   |
| 2014 | Himachal Pradesh | 89 (62-117)               |                                | 15 (11-20)                        |                                        | 29 (16-42)                 |                                 | 5 (3-7)                            |                              | 0 (0-0)              |                           | 0 (0-0)                      |                                   |
| 2015 | Himachal Pradesh | 82 (58-108)               | 0 (0-0)                        | 14 (10-19)                        | 0 (0-0)                                | 27 (14-39)                 | 0 (0-0)                         | 5 (3-7)                            | 0 (0-0)                      | 0 (0-0)              | 0 (0-0)                   | 0 (0-0)                      | 0 (0-0)                           |
| 2000 | Jammu & Kashmir  | 308 (217-405)             |                                | 29 (21-38)                        |                                        | 100 (55-148)               |                                 | 9 (5-14)                           |                              | 1 (0-1)              |                           | 0 (0-0)                      |                                   |
| 2001 | Jammu & Kashmir  | 288 (202-378)             |                                | 26 (18-34)                        |                                        | 93 (52-138)                |                                 | 8 (5-12)                           |                              | 1 (0-1)              |                           | 0 (0-0)                      |                                   |
| 2002 | Jammu & Kashmir  | 268 (188-352)             |                                | 23 (16-31)                        |                                        | 87 (48-128)                |                                 | 8 (4-11)                           |                              | 1 (0-1)              |                           | 0 (0-0)                      |                                   |
| 2003 | Jammu & Kashmir  | 250 (176-328)             |                                | 21 (15-27)                        |                                        | 82 (45-120)                |                                 | 7 (4-10)                           |                              | 1 (0-1)              |                           | 0 (0-0)                      |                                   |
| 2004 | Jammu & Kashmir  | 234 (164-307)             |                                | 19 (13-25)                        |                                        | 77 (42-112)                |                                 | 6 (3-9)                            |                              | 1 (0-1)              |                           | 0 (0-0)                      |                                   |
| 2005 | Jammu & Kashmir  | 218 (154-287)             |                                | 17 (12-22)                        |                                        | 72 (37-104)                |                                 | 6 (3-8)                            |                              | 1 (0-1)              |                           | 0 (0-0)                      |                                   |
| 2006 | Jammu & Kashmir  | 204 (144-269)             |                                | 15 (11-20)                        |                                        | 68 (33-100)                |                                 | 5 (2-7)                            |                              | 1 (0-1)              |                           | 0 (0-0)                      |                                   |
| 2007 | Jammu & Kashmir  | 190 (134-250)             |                                | 14 (10-18)                        |                                        | 64 (30-96)                 |                                 | 5 (2-7)                            |                              | 1 (0-1)              |                           | 0 (0-0)                      |                                   |
| 2008 | Jammu & Kashmir  | 177 (125-233)             |                                | 12 (9-16)                         |                                        | 60 (28-89)                 |                                 | 4 (2-6)                            |                              | 0 (0-1)              |                           | 0 (0-0)                      |                                   |
| 2009 | Jammu & Kashmir  | 165 (116-216)             |                                | 11 (8-15)                         |                                        | 56 (26-83)                 |                                 | 4 (2-6)                            |                              | 0 (0-1)              |                           | 0 (0-0)                      |                                   |
| 2010 | Jammu & Kashmir  | 152 (107-199)             |                                | 10 (7-13)                         |                                        | 51 (24-76)                 |                                 | 3 (2-5)                            |                              | 0 (0-1)              |                           | 0 (0-0)                      |                                   |
| 2011 | Jammu & Kashmir  | 138 (97-182)              |                                | 9 (6-12)                          |                                        | 47 (22-70)                 |                                 | 3 (1-4)                            |                              | 0 (0-1)              |                           | 0 (0-0)                      |                                   |

Hib = *Haemophilus influenzae* type b; npnm = non-pneumonia, non-meningitis; HIV = HIV-infected cases only; UR = uncertainty range

| Year | State           | Hib pneumonia deaths (UR) | Hib pneumonia deaths; HIV (UR) | Hib pneumonia mortality rate (UR) | Hib pneumonia mortality rate; HIV (UR) | Hib meningitis deaths (UR) | Hib meningitis deaths; HIV (UR) | Hib meningitis mortality rate (UR) | Hib meningitis mortality rate; HIV (UR) | Hib mortality rate; HIV (UR) | Hib NPNM deaths (UR) | Hib NPNM deaths; HIV (UR) | Hib NPNM mortality rate (UR) | Hib NPNM mortality rate; HIV (UR) |
|------|-----------------|---------------------------|--------------------------------|-----------------------------------|----------------------------------------|----------------------------|---------------------------------|------------------------------------|-----------------------------------------|------------------------------|----------------------|---------------------------|------------------------------|-----------------------------------|
| 2012 | Jammu & Kashmir | 125 (88-164)              |                                |                                   | 8 (5-10)                               | 42 (19-63)                 |                                 |                                    | 3 (1-4)                                 |                              |                      |                           | 0 (0-1)                      |                                   |
| 2013 | Jammu & Kashmir | 41 (29-53)                |                                |                                   | 2 (2-3)                                | 14 (6-20)                  |                                 |                                    | 1 (0-1)                                 |                              |                      |                           | 0 (0-0)                      |                                   |
| 2014 | Jammu & Kashmir | 12 (9-16)                 |                                |                                   | 1 (1-1)                                | 4 (2-6)                    |                                 |                                    | 0 (0-0)                                 |                              |                      |                           | 0 (0-0)                      |                                   |
| 2015 | Jammu & Kashmir | 12 (9-16)                 | 0 (0-0)                        |                                   | 1 (0-1)                                | 4 (2-6)                    | 0 (0-0)                         |                                    | 0 (0-0)                                 | 0 (0-0)                      |                      |                           | 0 (0-0)                      | 0 (0-0)                           |
| 2000 | Jharkhand       | 1376 (968-1809)           |                                |                                   | 37 (26-49)                             | 482 (181-747)              |                                 |                                    | 13 (5-20)                               |                              |                      |                           | 2 (1-3)                      |                                   |
| 2001 | Jharkhand       | 1366 (961-1794)           |                                |                                   | 36 (26-48)                             | 478 (164-764)              |                                 |                                    | 13 (4-20)                               |                              |                      |                           | 4 (1-6)                      |                                   |
| 2002 | Jharkhand       | 1335 (939-1755)           |                                |                                   | 35 (25-46)                             | 468 (160-747)              |                                 |                                    | 12 (4-20)                               |                              |                      |                           | 4 (1-6)                      |                                   |
| 2003 | Jharkhand       | 1320 (928-1734)           |                                |                                   | 34 (24-45)                             | 462 (158-739)              |                                 |                                    | 12 (4-19)                               |                              |                      |                           | 4 (1-6)                      |                                   |
| 2004 | Jharkhand       | 1246 (876-1637)           |                                |                                   | 32 (23-42)                             | 436 (149-697)              |                                 |                                    | 11 (4-18)                               |                              |                      |                           | 3 (1-6)                      |                                   |
| 2005 | Jharkhand       | 1133 (797-1489)           |                                |                                   | 29 (20-38)                             | 397 (137-633)              |                                 |                                    | 10 (3-16)                               |                              |                      |                           | 3 (1-5)                      |                                   |
| 2006 | Jharkhand       | 1122 (789-1474)           |                                |                                   | 28 (20-37)                             | 392 (137-625)              |                                 |                                    | 10 (3-16)                               |                              |                      |                           | 3 (1-5)                      |                                   |
| 2007 | Jharkhand       | 1037 (730-1363)           |                                |                                   | 26 (18-34)                             | 363 (127-576)              |                                 |                                    | 9 (3-14)                                |                              |                      |                           | 3 (1-5)                      |                                   |
| 2008 | Jharkhand       | 925 (651-1216)            |                                |                                   | 23 (16-30)                             | 323 (114-514)              |                                 |                                    | 8 (3-13)                                |                              |                      |                           | 3 (1-4)                      |                                   |
| 2009 | Jharkhand       | 817 (575-1074)            |                                |                                   | 20 (14-27)                             | 288 (100-454)              |                                 |                                    | 7 (2-11)                                |                              |                      |                           | 2 (1-4)                      |                                   |
| 2010 | Jharkhand       | 816 (574-1073)            |                                |                                   | 20 (14-26)                             | 285 (100-453)              |                                 |                                    | 7 (2-11)                                |                              |                      |                           | 2 (1-4)                      |                                   |
| 2011 | Jharkhand       | 764 (538-1004)            |                                |                                   | 19 (13-25)                             | 267 (94-424)               |                                 |                                    | 7 (2-10)                                |                              |                      |                           | 2 (1-3)                      |                                   |
| 2012 | Jharkhand       | 694 (488-912)             |                                |                                   | 17 (12-22)                             | 243 (85-385)               |                                 |                                    | 6 (2-9)                                 |                              |                      |                           | 2 (1-3)                      |                                   |
| 2013 | Jharkhand       | 617 (434-811)             |                                |                                   | 15 (11-20)                             | 216 (76-343)               |                                 |                                    | 5 (2-8)                                 |                              |                      |                           | 2 (1-3)                      |                                   |
| 2014 | Jharkhand       | 539 (379-708)             |                                |                                   | 13 (9-17)                              | 188 (66-299)               |                                 |                                    | 5 (2-7)                                 |                              |                      |                           | 2 (1-2)                      |                                   |
| 2015 | Jharkhand       | 116 (82-153)              | 0 (0-0)                        |                                   | 3 (2-4)                                | 41 (14-65)                 | 0 (0-0)                         |                                    | 0 (0-0)                                 | 0 (0-0)                      |                      |                           | 0 (0-0)                      | 0 (0-0)                           |
| 2000 | Karnataka       | 1946 (1369-2557)          |                                |                                   | 35 (24-46)                             | 671 (268-1037)             |                                 |                                    | 12 (6-18)                               |                              |                      |                           | 5 (2-8)                      |                                   |
| 2001 | Karnataka       | 1882 (1323-2472)          |                                |                                   | 33 (23-44)                             | 649 (259-1003)             |                                 |                                    | 11 (5-18)                               |                              |                      |                           | 5 (2-8)                      |                                   |
| 2002 | Karnataka       | 1849 (1301-2430)          |                                |                                   | 33 (23-43)                             | 637 (255-985)              |                                 |                                    | 11 (4-17)                               |                              |                      |                           | 5 (2-8)                      |                                   |
| 2003 | Karnataka       | 1819 (1279-2389)          |                                |                                   | 32 (22-42)                             | 626 (251-969)              |                                 |                                    | 11 (4-17)                               |                              |                      |                           | 5 (2-8)                      |                                   |
| 2004 | Karnataka       | 1780 (1252-2338)          |                                |                                   | 31 (22-41)                             | 612 (245-948)              |                                 |                                    | 11 (4-17)                               |                              |                      |                           | 5 (2-8)                      |                                   |
| 2005 | Karnataka       | 1723 (1212-2264)          |                                |                                   | 30 (21-40)                             | 591 (244-908)              |                                 |                                    | 10 (4-16)                               |                              |                      |                           | 5 (2-7)                      |                                   |
| 2006 | Karnataka       | 1660 (1169-2182)          |                                |                                   | 29 (20-38)                             | 569 (242-864)              |                                 |                                    | 10 (4-15)                               |                              |                      |                           | 5 (2-7)                      |                                   |
| 2007 | Karnataka       | 1571 (1105-2065)          |                                |                                   | 27 (19-36)                             | 536 (235-807)              |                                 |                                    | 9 (4-14)                                |                              |                      |                           | 4 (2-6)                      |                                   |
| 2008 | Karnataka       | 1473 (1036-1936)          |                                |                                   | 26 (18-34)                             | 501 (220-756)              |                                 |                                    | 9 (4-13)                                |                              |                      |                           | 4 (2-6)                      |                                   |
| 2009 | Karnataka       | 1364 (959-1792)           |                                |                                   | 24 (17-32)                             | 462 (208-693)              |                                 |                                    | 8 (4-12)                                |                              |                      |                           | 4 (2-6)                      |                                   |
| 2010 | Karnataka       | 1236 (869-1624)           |                                |                                   | 22 (15-29)                             | 417 (193-621)              |                                 |                                    | 7 (3-11)                                |                              |                      |                           | 3 (2-5)                      |                                   |
| 2011 | Karnataka       | 1096 (771-1440)           |                                |                                   | 19 (14-26)                             | 369 (175-544)              |                                 |                                    | 7 (3-10)                                |                              |                      |                           | 3 (1-4)                      |                                   |
| 2012 | Karnataka       | 934 (657-1227)            |                                |                                   | 17 (12-22)                             | 313 (152-458)              |                                 |                                    | 6 (3-8)                                 |                              |                      |                           | 2 (1-4)                      |                                   |
| 2013 | Karnataka       | 258 (181-339)             |                                |                                   | 5 (4-6)                                | 86 (42-126)                |                                 |                                    | 1 (0-1)                                 |                              |                      |                           | 0 (0-1)                      |                                   |
| 2014 | Karnataka       | 55 (38-72)                |                                |                                   | 1 (1-1)                                | 18 (9-27)                  |                                 |                                    | 0 (0-0)                                 |                              |                      |                           | 0 (0-0)                      |                                   |
| 2015 | Karnataka       | 42 (30-56)                | 0 (0-0)                        |                                   | 1 (1-1)                                | 14 (7-21)                  | 0 (0-0)                         |                                    | 0 (0-0)                                 | 0 (0-0)                      |                      |                           | 0 (0-0)                      | 0 (0-0)                           |
| 2000 | Kerala          | 170 (119-223)             |                                |                                   | 5 (4-7)                                | 55 (11-92)                 |                                 |                                    | 2 (0-3)                                 |                              |                      |                           | 0 (0-1)                      |                                   |
| 2001 | Kerala          | 165 (116-217)             |                                |                                   | 5 (4-7)                                | 54 (11-89)                 |                                 |                                    | 2 (0-3)                                 |                              |                      |                           | 0 (0-1)                      |                                   |
| 2002 | Kerala          | 160 (113-211)             |                                |                                   | 5 (4-7)                                | 52 (11-87)                 |                                 |                                    | 2 (0-3)                                 |                              |                      |                           | 0 (0-1)                      |                                   |
| 2003 | Kerala          | 157 (110-206)             |                                |                                   | 5 (4-7)                                | 51 (11-85)                 |                                 |                                    | 2 (0-3)                                 |                              |                      |                           | 0 (0-1)                      |                                   |
| 2004 | Kerala          | 154 (109-203)             |                                |                                   | 5 (4-7)                                | 50 (10-83)                 |                                 |                                    | 2 (0-3)                                 |                              |                      |                           | 0 (0-1)                      |                                   |
| 2005 | Kerala          | 152 (107-200)             |                                |                                   | 5 (4-7)                                | 49 (11-80)                 |                                 |                                    | 2 (0-3)                                 |                              |                      |                           | 0 (0-1)                      |                                   |
| 2006 | Kerala          | 152 (107-200)             |                                |                                   | 5 (4-7)                                | 48 (12-77)                 |                                 |                                    | 2 (0-3)                                 |                              |                      |                           | 0 (0-1)                      |                                   |
| 2007 | Kerala          | 152 (107-200)             |                                |                                   | 5 (4-7)                                | 47 (13-73)                 |                                 |                                    | 2 (0-2)                                 |                              |                      |                           | 0 (0-1)                      |                                   |
| 2008 | Kerala          | 154 (108-202)             |                                |                                   | 5 (4-7)                                | 47 (14-74)                 |                                 |                                    | 2 (0-3)                                 |                              |                      |                           | 0 (0-1)                      |                                   |
| 2009 | Kerala          | 156 (110-205)             |                                |                                   | 5 (4-7)                                | 47 (14-75)                 |                                 |                                    | 2 (0-3)                                 |                              |                      |                           | 0 (0-1)                      |                                   |
| 2010 | Kerala          | 158 (111-208)             |                                |                                   | 6 (4-7)                                | 48 (14-76)                 |                                 |                                    | 2 (0-3)                                 |                              |                      |                           | 0 (0-1)                      |                                   |
| 2011 | Kerala          | 160 (113-211)             |                                |                                   | 6 (4-8)                                | 49 (14-78)                 |                                 |                                    | 2 (1-3)                                 |                              |                      |                           | 0 (0-1)                      |                                   |
| 2012 | Kerala          | 25 (18-33)                |                                |                                   | 1 (1-1)                                | 8 (2-12)                   |                                 |                                    | 0 (0-0)                                 |                              |                      |                           | 0 (0-0)                      |                                   |
| 2013 | Kerala          | 13 (9-17)                 |                                |                                   | 0 (0-1)                                | 4 (1-6)                    |                                 |                                    | 0 (0-0)                                 |                              |                      |                           | 0 (0-0)                      |                                   |
| 2014 | Kerala          | 13 (9-17)                 |                                |                                   | 1 (0-1)                                | 4 (1-6)                    |                                 |                                    | 0 (0-0)                                 |                              |                      |                           | 0 (0-0)                      |                                   |
| 2015 | Kerala          | 13 (9-17)                 | 0 (0-0)                        |                                   | 1 (0-1)                                | 4 (1-6)                    | 0 (0-0)                         |                                    | 0 (0-0)                                 | 0 (0-0)                      |                      |                           | 0 (0-0)                      | 0 (0-0)                           |
| 2000 | Madhya Pradesh  | 6165 (4336-8101)          |                                |                                   | 74 (52-97)                             | 2156 (810-3349)            |                                 |                                    | 26 (10-40)                              |                              |                      |                           | 9 (3-14)                     |                                   |
| 2001 | Madhya Pradesh  | 5896 (4147-7747)          |                                |                                   | 70 (49-92)                             | 2062 (774-3203)            |                                 |                                    | 24 (9-38)                               |                              |                      |                           | 8 (3-13)                     |                                   |
| 2002 | Madhya Pradesh  | 5644 (3970-7416)          |                                |                                   | 67 (47-88)                             | 1973 (741-3066)            |                                 |                                    | 23 (9-36)                               |                              |                      |                           | 8 (3-12)                     |                                   |
| 2003 | Madhya Pradesh  | 5401 (3799-7097)          |                                |                                   | 64 (45-84)                             | 1888 (709-2934)            |                                 |                                    | 22 (8-35)                               |                              |                      |                           | 8 (3-12)                     |                                   |
| 2004 | Madhya Pradesh  | 5155 (3625-6773)          |                                |                                   | 61 (43-80)                             | 1799 (677-2800)            |                                 |                                    | 21 (8-33)                               |                              |                      |                           | 7 (3-11)                     |                                   |
| 2005 | Madhya Pradesh  | 4914 (3456-6456)          |                                |                                   | 58 (41-76)                             | 1712 (662-2647)            |                                 |                                    | 20 (8-31)                               |                              |                      |                           | 7 (3-11)                     |                                   |
| 2006 | Madhya Pradesh  | 4684 (3294-6155)          |                                |                                   | 55 (39-72)                             | 1629 (648-2501)            |                                 |                                    | 19 (8-29)                               |                              |                      |                           | 7 (3-10)                     |                                   |
| 2007 | Madhya Pradesh  | 4429 (3115-5620)          |                                |                                   | 52 (37-69)                             | 1538 (629-2343)            |                                 |                                    | 18 (7-28)                               |                              |                      |                           | 6 (3-10)                     |                                   |
| 2008 | Madhya Pradesh  | 4187 (2945-5501)          |                                |                                   | 49 (35-65)                             | 1451 (594-2215)            |                                 |                                    | 17 (7-26)                               |                              |                      |                           | 6 (2-9)                      |                                   |
| 2009 | Madhya Pradesh  | 3950 (2778-5190)          |                                |                                   | 47 (33-62)                             | 1368 (561-2089)            |                                 |                                    | 16 (7-25)                               |                              |                      |                           | 6 (2-9)                      |                                   |
| 2010 | Madhya Pradesh  | 3711 (2610-4876)          |                                |                                   | 44 (31-58)                             | 1285 (527-1963)            |                                 |                                    | 15 (6-23)                               |                              |                      |                           | 5 (2-8)                      |                                   |
| 2011 | Madhya Pradesh  | 3492 (2456-4588)          |                                |                                   | 42 (30-55)                             | 1210 (496-1847)            |                                 |                                    | 15 (6-22)                               |                              |                      |                           | 5 (2-8)                      |                                   |
| 2012 | Madhya Pradesh  | 3278 (2305-4307)          |                                |                                   | 40 (28-52)                             | 1136 (465-1734)            |                                 |                                    | 14 (6-21)                               |                              |                      |                           | 5 (2-7)                      |                                   |
| 2013 | Madhya Pradesh  | 3140 (2209-4126)          |                                |                                   | 38 (27-51)                             | 1089 (410-1708)            |                                 |                                    | 13 (5-21)                               |                              |                      |                           | 5 (2-7)                      |                                   |
| 2014 | Madhya Pradesh  | 2817 (1998-3701)          |                                |                                   | 35 (25-43)                             | 977 (368-1532)             |                                 |                                    | 12 (5-19)                               |                              |                      |                           | 5 (2-8)                      |                                   |
| 2015 | Madhya Pradesh  | 315 (222-416)             | 1 (1-1)                        |                                   | 4 (3-5)                                | 110 (41-172)               | 0 (0-0)                         |                                    | 1 (1-2)                                 | 0 (0-0)                      |                      |                           | 0 (0-1)                      | 0 (0-0)                           |
| 2000 | Maharashtra     | 2773 (1950-3643)          |                                |                                   | 26 (18-34)                             | 949 (402-1445)             |                                 |                                    | 9 (4-13)                                |                              |                      |                           | 8 (3-12)                     |                                   |
| 2001 | Maharashtra     | 2592 (1823-3406)          |                                |                                   | 24 (17-31)                             | 887 (376-1351)             |                                 |                                    | 8 (3-12)                                |                              |                      |                           | 7 (3-11)                     |                                   |
| 2002 | Maharashtra     | 2406 (1692-3161)          |                                |                                   | 22 (15-29)                             | 823 (349-1254)             |                                 |                                    | 8 (3-11)                                |                              |                      |                           | 7 (3-10)                     |                                   |
| 2003 | Maharashtra     | 2220 (1561-2917)          |                                |                                   | 20 (14-27)                             | 759 (322-1157)             |                                 |                                    | 7 (3-11)                                |                              |                      |                           | 6 (3-9)                      |                                   |
| 2004 | Maharashtra     | 2037 (1433-2676)          |                                |                                   | 19 (13-25)                             | 695 (295-1062)             |                                 |                                    | 6 (3-10)                                |                              |                      |                           | 6 (2-8)                      |                                   |
| 2005 | Maharashtra     | 1861 (1300-2446)          |                                |                                   | 17 (12-23)                             | 634 (277-959)              |                                 |                                    | 5 (3-9)                                 |                              |                      |                           | 5 (2-8)                      |                                   |
| 2006 | Maharashtra     | 1696 (1193-2228)          |                                |                                   | 16 (11-21)                             | 576 (256-863)              |                                 |                                    | 5 (2-8)                                 |                              |                      |                           | 5 (2-7)                      |                                   |
| 2007 | Maharashtra     | 1527 (1074-2006)          |                                |                                   | 14 (10-19)                             | 517 (239-766)              |                                 |                                    | 5 (2-7)                                 |                              |                      |                           | 4 (2-6)                      |                                   |
| 2008 | Maharashtra     | 1380 (971-1814)           |                                |                                   | 13 (9-17)                              | 466 (216-692)              |                                 |                                    | 4 (2-6)                                 |                              |                      |                           | 4 (2-6)                      |                                   |
| 2009 | Maharashtra     | 1239 (871-1628)           |                                |                                   | 12 (8-15)                              | 417 (194-621)              |                                 |                                    | 4 (2-6)                                 |                              |                      |                           | 3 (2-5)                      |                                   |
| 2010 | Maharashtra     | 1099 (773-1444)           |                                |                                   | 10 (7-14)                              | 367 (172-551)              |                                 |                                    | 3 (2-5)                                 |                              |                      |                           | 3 (1-4)                      |                                   |
| 2011 | Maharashtra     | 992 (697-1303)            |                                |                                   | 10 (7-12)                              | 328 (155-497)              |                                 |                                    | 3 (1-5)                                 |                              |                      |                           | 3 (1-4)                      |                                   |
| 2012 | Maharashtra     | 878 (618-1154)            |                                |                                   | 9 (6-11)                               | 287 (87-454)               |                                 |                                    | 2 (1-4)                                 |                              |                      |                           | 2 (1-4)                      |                                   |
| 2013 | Maharashtra     | 783 (550-1028)            |                                |                                   | 8 (5-10)                               | 252 (60-404)               |                                 |                                    | 2 (1-4)                                 |                              |                      |                           | 2 (0-3)                      |                                   |
| 2014 | Maharashtra     | 690 (486-907)             |                                |                                   | 7 (5-9)                                | 220 (53-357)               |                                 |                                    | 2 (1-4)                                 |                              |                      |                           | 2 (0-3)                      |                                   |
| 2015 | Maharashtra     | 580 (408-762)             | 1 (1-2)                        |                                   | 6 (4-8)                                | 184 (44-300)               | 0 (0-1)                         |                                    | 2 (0-3)                                 | 0 (0-0)                      |                      |                           | 1 (0-2)                      | 0 (0-0)                           |
| 2000 | Manipur         | 31 (22-41)                |                                |                                   | 14 (10-18)                             | 11 (4-17)                  |                                 |                                    | 5 (2-8)                                 |                              |                      |                           | 0 (0-0)                      |                                   |
| 2001 | Manipur         | 29 (21-39)                |                                |                                   | 12 (8-16)                              | 10 (3-17)                  |                                 |                                    | 4 (1-7)                                 |                              |                      |                           | 0 (0-0)                      |                                   |
| 2002 | Manipur         | 28 (20-37)                |                                |                                   | 12 (8-15)                              | 10 (3-16)                  |                                 |                                    | 4 (1-7)                                 |                              |                      |                           | 0 (0-0)                      |                                   |

Hib = *Haemophilus influenzae* type b; npnm = non-pneumonia, non-meningitis; HIV = HIV-infected cases only; UR = uncertainty range

| Year | State     | Hib pneumonia deaths (UR) | Hib pneumonia deaths; HIV (UR) | Hib pneumonia mortality rate (UR) | Hib pneumonia mortality rate; HIV (UR) | Hib meningitis deaths (UR) | Hib meningitis deaths; HIV (UR) | Hib meningitis mortality rate (UR) | Hib mortality rate; HIV (UR) | Hib NPNM deaths (UR) | Hib NPNM deaths; HIV (UR) | Hib NPNM mortality rate (UR) | Hib NPNM mortality rate; HIV (UR) |
|------|-----------|---------------------------|--------------------------------|-----------------------------------|----------------------------------------|----------------------------|---------------------------------|------------------------------------|------------------------------|----------------------|---------------------------|------------------------------|-----------------------------------|
| 2003 | Manipur   | 26 (19-35)                |                                | 11 (8-14)                         |                                        | 9 (1-16)                   |                                 | 4 (0-6)                            |                              | 0 (0-0)              |                           | 0 (0-0)                      |                                   |
| 2004 | Manipur   | 26 (18-34)                |                                | 10 (7-13)                         |                                        | 9 (1-15)                   |                                 | 4 (0-6)                            |                              | 0 (0-0)              |                           | 0 (0-0)                      |                                   |
| 2005 | Manipur   | 25 (18-33)                |                                | 10 (7-13)                         |                                        | 9 (1-15)                   |                                 | 3 (0-6)                            |                              | 0 (0-0)              |                           | 0 (0-0)                      |                                   |
| 2006 | Manipur   | 25 (17-32)                |                                | 9 (7-12)                          |                                        | 9 (1-15)                   |                                 | 3 (0-6)                            |                              | 0 (0-0)              |                           | 0 (0-0)                      |                                   |
| 2007 | Manipur   | 25 (17-32)                |                                | 9 (6-12)                          |                                        | 9 (1-15)                   |                                 | 3 (0-6)                            |                              | 0 (0-0)              |                           | 0 (0-0)                      |                                   |
| 2008 | Manipur   | 25 (18-33)                |                                | 9 (6-12)                          |                                        | 9 (1-15)                   |                                 | 3 (0-6)                            |                              | 0 (0-0)              |                           | 0 (0-0)                      |                                   |
| 2009 | Manipur   | 25 (18-33)                |                                | 9 (6-12)                          |                                        | 9 (1-15)                   |                                 | 3 (0-5)                            |                              | 0 (0-0)              |                           | 0 (0-0)                      |                                   |
| 2010 | Manipur   | 26 (18-34)                |                                | 9 (6-12)                          |                                        | 9 (1-15)                   |                                 | 3 (0-5)                            |                              | 0 (0-0)              |                           | 0 (0-0)                      |                                   |
| 2011 | Manipur   | 26 (18-34)                |                                | 9 (6-12)                          |                                        | 9 (1-15)                   |                                 | 3 (0-5)                            |                              | 0 (0-0)              |                           | 0 (0-0)                      |                                   |
| 2012 | Manipur   | 26 (18-34)                |                                | 9 (6-12)                          |                                        | 9 (1-15)                   |                                 | 3 (0-5)                            |                              | 0 (0-0)              |                           | 0 (0-0)                      |                                   |
| 2013 | Manipur   | 26 (18-34)                |                                | 9 (6-12)                          |                                        | 9 (1-15)                   |                                 | 3 (0-5)                            |                              | 0 (0-0)              |                           | 0 (0-0)                      |                                   |
| 2014 | Manipur   | 25 (18-33)                |                                | 9 (6-11)                          |                                        | 9 (1-15)                   |                                 | 3 (0-5)                            |                              | 0 (0-0)              |                           | 0 (0-0)                      |                                   |
| 2015 | Manipur   | 22 (16-29)                | 0 (0-0)                        | 7 (5-10)                          | 0 (0-0)                                | 8 (1-13)                   | 0 (0-0)                         | 3 (0-4)                            | 0 (0-0)                      | 0 (0-0)              | 0 (0-0)                   | 0 (0-0)                      | 0 (0-0)                           |
| 2000 | Meghalaya | 159 (112-209)             |                                | 44 (31-58)                        |                                        | 54 (25-81)                 |                                 | 15 (7-22)                          |                              | 0 (0-0)              |                           | 0 (0-0)                      |                                   |
| 2001 | Meghalaya | 165 (116-216)             |                                | 44 (31-58)                        |                                        | 56 (26-84)                 |                                 | 15 (7-23)                          |                              | 0 (0-0)              |                           | 0 (0-0)                      |                                   |
| 2002 | Meghalaya | 171 (120-225)             |                                | 45 (32-59)                        |                                        | 59 (27-88)                 |                                 | 15 (7-23)                          |                              | 0 (0-0)              |                           | 0 (0-0)                      |                                   |
| 2003 | Meghalaya | 178 (125-234)             |                                | 46 (32-60)                        |                                        | 61 (28-91)                 |                                 | 16 (7-23)                          |                              | 0 (0-0)              |                           | 0 (0-0)                      |                                   |
| 2004 | Meghalaya | 185 (130-243)             |                                | 46 (33-61)                        |                                        | 63 (29-94)                 |                                 | 16 (7-24)                          |                              | 0 (0-0)              |                           | 0 (0-0)                      |                                   |
| 2005 | Meghalaya | 191 (134-251)             |                                | 47 (33-62)                        |                                        | 65 (30-97)                 |                                 | 16 (7-24)                          |                              | 0 (0-0)              |                           | 0 (0-0)                      |                                   |
| 2006 | Meghalaya | 197 (139-259)             |                                | 47 (33-62)                        |                                        | 67 (32-99)                 |                                 | 16 (8-24)                          |                              | 0 (0-0)              |                           | 0 (0-0)                      |                                   |
| 2007 | Meghalaya | 202 (142-266)             |                                | 48 (34-63)                        |                                        | 69 (33-101)                |                                 | 16 (8-24)                          |                              | 0 (0-0)              |                           | 0 (0-0)                      |                                   |
| 2008 | Meghalaya | 208 (146-274)             |                                | 48 (34-63)                        |                                        | 71 (34-104)                |                                 | 16 (8-24)                          |                              | 0 (0-0)              |                           | 0 (0-0)                      |                                   |
| 2009 | Meghalaya | 211 (148-277)             |                                | 48 (34-63)                        |                                        | 72 (33-108)                |                                 | 16 (7-24)                          |                              | 0 (0-0)              |                           | 0 (0-0)                      |                                   |
| 2010 | Meghalaya | 221 (155-290)             |                                | 50 (35-65)                        |                                        | 76 (33-115)                |                                 | 17 (7-26)                          |                              | 0 (0-0)              |                           | 0 (0-0)                      |                                   |
| 2011 | Meghalaya | 228 (160-300)             |                                | 50 (35-66)                        |                                        | 79 (33-120)                |                                 | 17 (7-27)                          |                              | 0 (0-0)              |                           | 0 (0-0)                      |                                   |
| 2012 | Meghalaya | 234 (164-307)             |                                | 51 (36-67)                        |                                        | 81 (32-125)                |                                 | 18 (7-27)                          |                              | 0 (0-1)              |                           | 0 (0-0)                      |                                   |
| 2013 | Meghalaya | 242 (170-317)             |                                | 52 (37-69)                        |                                        | 84 (33-129)                |                                 | 18 (7-28)                          |                              | 0 (0-1)              |                           | 0 (0-0)                      |                                   |
| 2014 | Meghalaya | 247 (174-325)             |                                | 53 (37-69)                        |                                        | 86 (34-132)                |                                 | 18 (7-28)                          |                              | 0 (0-1)              |                           | 0 (0-0)                      |                                   |
| 2015 | Meghalaya | 231 (163-304)             | 1 (0-1)                        | 49 (34-64)                        | 0 (0-0)                                | 80 (32-124)                | 0 (0-0)                         | 17 (7-26)                          | 0 (0-0)                      | 0 (0-1)              | 0 (0-0)                   | 0 (0-0)                      | 0 (0-0)                           |
| 2000 | Mizoram   | 47 (33-62)                |                                | 42 (29-55)                        |                                        | 17 (6-26)                  |                                 | 15 (5-23)                          |                              | 0 (0-0)              |                           | 0 (0-0)                      |                                   |
| 2001 | Mizoram   | 46 (32-60)                |                                | 40 (28-52)                        |                                        | 16 (6-25)                  |                                 | 14 (5-22)                          |                              | 0 (0-0)              |                           | 0 (0-0)                      |                                   |
| 2002 | Mizoram   | 45 (32-59)                |                                | 38 (27-50)                        |                                        | 16 (6-25)                  |                                 | 13 (5-21)                          |                              | 0 (0-0)              |                           | 0 (0-0)                      |                                   |
| 2003 | Mizoram   | 45 (31-59)                |                                | 37 (26-49)                        |                                        | 16 (6-24)                  |                                 | 13 (5-20)                          |                              | 0 (0-0)              |                           | 0 (0-0)                      |                                   |
| 2004 | Mizoram   | 44 (31-58)                |                                | 36 (25-48)                        |                                        | 16 (6-24)                  |                                 | 13 (5-20)                          |                              | 0 (0-0)              |                           | 0 (0-0)                      |                                   |
| 2005 | Mizoram   | 44 (31-58)                |                                | 35 (25-47)                        |                                        | 15 (6-24)                  |                                 | 12 (5-19)                          |                              | 0 (0-0)              |                           | 0 (0-0)                      |                                   |
| 2006 | Mizoram   | 44 (31-58)                |                                | 35 (25-46)                        |                                        | 15 (6-24)                  |                                 | 12 (5-19)                          |                              | 0 (0-0)              |                           | 0 (0-0)                      |                                   |
| 2007 | Mizoram   | 44 (31-58)                |                                | 34 (24-45)                        |                                        | 15 (6-24)                  |                                 | 12 (5-19)                          |                              | 0 (0-0)              |                           | 0 (0-0)                      |                                   |
| 2008 | Mizoram   | 44 (31-58)                |                                | 34 (24-44)                        |                                        | 15 (6-24)                  |                                 | 12 (4-18)                          |                              | 0 (0-0)              |                           | 0 (0-0)                      |                                   |
| 2009 | Mizoram   | 44 (31-58)                |                                | 33 (23-44)                        |                                        | 15 (6-24)                  |                                 | 12 (4-18)                          |                              | 0 (0-0)              |                           | 0 (0-0)                      |                                   |
| 2010 | Mizoram   | 43 (31-57)                |                                | 32 (23-43)                        |                                        | 15 (6-23)                  |                                 | 11 (4-17)                          |                              | 0 (0-0)              |                           | 0 (0-0)                      |                                   |
| 2011 | Mizoram   | 44 (31-58)                |                                | 32 (23-43)                        |                                        | 15 (6-23)                  |                                 | 11 (4-17)                          |                              | 0 (0-0)              |                           | 0 (0-0)                      |                                   |
| 2012 | Mizoram   | 43 (31-57)                |                                | 32 (22-42)                        |                                        | 15 (6-23)                  |                                 | 11 (4-17)                          |                              | 0 (0-0)              |                           | 0 (0-0)                      |                                   |
| 2013 | Mizoram   | 44 (31-57)                |                                | 32 (22-42)                        |                                        | 15 (6-23)                  |                                 | 11 (4-17)                          |                              | 0 (0-0)              |                           | 0 (0-0)                      |                                   |
| 2014 | Mizoram   | 43 (31-57)                |                                | 31 (22-41)                        |                                        | 15 (6-23)                  |                                 | 11 (4-17)                          |                              | 0 (0-0)              |                           | 0 (0-0)                      |                                   |
| 2015 | Mizoram   | 38 (27-50)                | 0 (0-0)                        | 27 (19-36)                        | 0 (0-0)                                | 13 (5-21)                  | 0 (0-0)                         | 10 (4-15)                          | 0 (0-0)                      | 0 (0-0)              | 0 (0-0)                   | 0 (0-0)                      | 0 (0-0)                           |
| 2000 | Nagaland  | 32 (22-42)                |                                | 15 (11-20)                        |                                        | 11 (4-18)                  |                                 | 5 (2-8)                            |                              | 0 (0-0)              |                           | 0 (0-0)                      |                                   |
| 2001 | Nagaland  | 34 (24-44)                |                                | 16 (11-21)                        |                                        | 12 (4-19)                  |                                 | 6 (2-9)                            |                              | 0 (0-0)              |                           | 0 (0-0)                      |                                   |
| 2002 | Nagaland  | 36 (25-47)                |                                | 17 (12-22)                        |                                        | 13 (4-20)                  |                                 | 6 (2-9)                            |                              | 0 (0-0)              |                           | 0 (0-0)                      |                                   |
| 2003 | Nagaland  | 39 (27-51)                |                                | 18 (12-23)                        |                                        | 14 (4-22)                  |                                 | 6 (2-10)                           |                              | 0 (0-0)              |                           | 0 (0-0)                      |                                   |
| 2004 | Nagaland  | 41 (29-54)                |                                | 19 (13-25)                        |                                        | 14 (5-23)                  |                                 | 7 (2-11)                           |                              | 0 (0-0)              |                           | 0 (0-0)                      |                                   |
| 2005 | Nagaland  | 43 (30-56)                |                                | 20 (14-26)                        |                                        | 15 (5-24)                  |                                 | 7 (2-11)                           |                              | 0 (0-0)              |                           | 0 (0-0)                      |                                   |
| 2006 | Nagaland  | 44 (31-58)                |                                | 20 (14-26)                        |                                        | 16 (5-25)                  |                                 | 7 (2-11)                           |                              | 0 (0-0)              |                           | 0 (0-0)                      |                                   |
| 2007 | Nagaland  | 45 (32-59)                |                                | 20 (14-27)                        |                                        | 16 (5-26)                  |                                 | 7 (2-12)                           |                              | 0 (0-0)              |                           | 0 (0-0)                      |                                   |
| 2008 | Nagaland  | 46 (32-60)                |                                | 21 (15-27)                        |                                        | 16 (5-26)                  |                                 | 7 (2-12)                           |                              | 0 (0-0)              |                           | 0 (0-0)                      |                                   |
| 2009 | Nagaland  | 45 (32-59)                |                                | 20 (14-27)                        |                                        | 16 (5-26)                  |                                 | 7 (2-12)                           |                              | 0 (0-0)              |                           | 0 (0-0)                      |                                   |
| 2010 | Nagaland  | 47 (33-62)                |                                | 21 (15-28)                        |                                        | 17 (5-28)                  |                                 | 8 (2-13)                           |                              | 0 (0-0)              |                           | 0 (0-0)                      |                                   |
| 2011 | Nagaland  | 47 (33-62)                |                                | 22 (15-28)                        |                                        | 17 (5-28)                  |                                 | 8 (2-13)                           |                              | 0 (0-0)              |                           | 0 (0-0)                      |                                   |
| 2012 | Nagaland  | 47 (33-61)                |                                | 21 (15-28)                        |                                        | 17 (5-28)                  |                                 | 8 (2-13)                           |                              | 0 (0-0)              |                           | 0 (0-0)                      |                                   |
| 2013 | Nagaland  | 46 (32-60)                |                                | 21 (15-28)                        |                                        | 16 (4-27)                  |                                 | 8 (2-12)                           |                              | 0 (0-0)              |                           | 0 (0-0)                      |                                   |
| 2014 | Nagaland  | 44 (31-58)                |                                | 20 (14-27)                        |                                        | 16 (4-26)                  |                                 | 7 (2-12)                           |                              | 0 (0-0)              |                           | 0 (0-0)                      |                                   |
| 2015 | Nagaland  | 40 (28-53)                | 0 (0-0)                        | 19 (13-24)                        | 0 (0-0)                                | 14 (4-24)                  | 0 (0-0)                         | 7 (2-11)                           | 0 (0-0)                      | 0 (0-0)              | 0 (0-0)                   | 0 (0-0)                      | 0 (0-0)                           |
| 2000 | Odisha    | 2867 (2016-3767)          |                                | 71 (50-93)                        |                                        | 992 (408-1514)             |                                 | 24 (10-37)                         |                              | 4 (2-6)              |                           | 0 (0-0)                      |                                   |
| 2001 | Odisha    | 2707 (1904-3557)          |                                | 66 (47-87)                        |                                        | 937 (386-1430)             |                                 | 23 (9-35)                          |                              | 4 (2-6)              |                           | 0 (0-0)                      |                                   |
| 2002 | Odisha    | 2544 (1789-3342)          |                                | 62 (44-81)                        |                                        | 881 (362-1344)             |                                 | 21 (9-33)                          |                              | 4 (1-5)              |                           | 0 (0-0)                      |                                   |
| 2003 | Odisha    | 2398 (1687-3151)          |                                | 58 (41-76)                        |                                        | 830 (342-1267)             |                                 | 20 (8-31)                          |                              | 3 (1-5)              |                           | 0 (0-0)                      |                                   |
| 2004 | Odisha    | 2253 (1585-2961)          |                                | 55 (39-72)                        |                                        | 781 (321-1190)             |                                 | 19 (8-29)                          |                              | 3 (1-5)              |                           | 0 (0-0)                      |                                   |
| 2005 | Odisha    | 2112 (1489-2775)          |                                | 51 (36-67)                        |                                        | 732 (299-1118)             |                                 | 18 (7-27)                          |                              | 3 (1-5)              |                           | 0 (0-0)                      |                                   |
| 2006 | Odisha    | 1981 (1393-2603)          |                                | 48 (34-63)                        |                                        | 687 (279-1051)             |                                 | 17 (7-25)                          |                              | 3 (1-4)              |                           | 0 (0-0)                      |                                   |
| 2007 | Odisha    | 1833 (1289-2409)          |                                | 44 (31-58)                        |                                        | 636 (257-975)              |                                 | 16 (6-24)                          |                              | 3 (1-4)              |                           | 0 (0-0)                      |                                   |
| 2008 | Odisha    | 1700 (1196-2234)          |                                | 41 (29-54)                        |                                        | 590 (238-904)              |                                 | 14 (6-22)                          |                              | 2 (1-4)              |                           | 0 (0-0)                      |                                   |
| 2009 | Odisha    | 1570 (1104-2063)          |                                | 38 (27-50)                        |                                        | 545 (220-835)              |                                 | 13 (5-20)                          |                              | 2 (1-3)              |                           | 0 (0-0)                      |                                   |
| 2010 | Odisha    | 1445 (1017-1899)          |                                | 35 (25-46)                        |                                        | 502 (202-769)              |                                 | 12 (5-19)                          |                              | 2 (1-3)              |                           | 0 (0-0)                      |                                   |
| 2011 | Odisha    | 1335 (939-1754)           |                                | 33 (23-43)                        |                                        | 464 (172-730)              |                                 | 11 (4-18)                          |                              | 4 (1-6)              |                           | 0 (0-0)                      |                                   |
| 2012 | Odisha    | 1223 (860-1607)           |                                | 30 (21-39)                        |                                        | 425 (157-669)              |                                 | 11 (4-17)                          |                              | 3 (1-5)              |                           | 0 (0-0)                      |                                   |
| 2013 | Odisha    | 1129 (794-1483)           |                                | 28 (20-37)                        |                                        | 393 (145-618)              |                                 | 10 (4-15)                          |                              | 3 (1-5)              |                           | 0 (0-0)                      |                                   |
| 2014 | Odisha    | 1022 (719-1343)           |                                | 26 (18-34)                        |                                        | 355 (131-559)              |                                 | 9 (3-14)                           |                              | 3 (1-4)              |                           | 0 (0-0)                      |                                   |
| 2015 | Odisha    | 820 (577-1078)            | 2 (1-3)                        | 21 (15-27)                        | 0 (0-0)                                | 285 (105-449)              | 1 (0-1)                         | 7 (3-11)                           | 0 (0-0)                      | 2 (1-4)              | 0 (0-0)                   | 0 (0-0)                      | 0 (0-0)                           |
| 2000 | Punjab    | 903 (635-1186)            |                                | 37 (26-49)                        |                                        | 302 (146-444)              |                                 | 12 (6-18)                          |                              | 2 (1-4)              |                           | 0 (0-0)                      |                                   |
| 2001 | Punjab    | 839 (590-1103)            |                                | 34 (24-45)                        |                                        | 281 (136-413)              |                                 | 12 (6-17)                          |                              | 2 (1-3)              |                           | 0 (0-0)                      |                                   |
| 2002 | Punjab    | 777 (541-1021)            |                                | 32 (22-42)                        |                                        | 260 (126-382)              |                                 | 11 (5-16)                          |                              | 2 (1-3)              |                           | 0 (0-0)                      |                                   |
| 2003 | Punjab    | 720 (507-946)             |                                | 29 (21-39)                        |                                        | 241 (117-354)              |                                 | 10 (5-14)                          |                              | 2 (1-3)              |                           | 0 (0-0)                      |                                   |
| 2004 | Punjab    | 665 (468-874)             |                                | 27 (19-36)                        |                                        | 222 (108-327)              |                                 | 9 (4-13)                           |                              | 2 (1-3)              |                           | 0 (0-0)                      |                                   |
| 2005 | Punjab    | 612 (431-805)             |                                | 25 (18-33)                        |                                        | 204 (101-297)              |                                 | 8 (4-12)                           |                              | 2 (1-2)              |                           | 0 (0-0)                      |                                   |
| 2006 | Punjab    | 564 (396-741)             |                                | 23 (16-30)                        |                                        | 187 (96-269)               |                                 | 8 (4-11)                           |                              | 1 (1-2)              |                           | 0 (0-0)                      |                                   |
| 2007 | Punjab    | 515 (362-677)             |                                | 21 (15-28)                        |                                        | 170 (89-246)               |                                 | 7 (4-10)                           |                              | 1 (1-2)              |                           | 0 (0-0)                      |                                   |
| 2008 | Punjab    | 471 (331-619)             |                                | 19 (14-26)                        |                                        | 155 (82-225)               |                                 | 6 (3-9)                            |                              | 1 (1-2)              |                           | 0 (0-0)                      |                                   |
| 2009 | Punjab    | 431 (303-566)             |                                | 18 (13-23)                        |                                        | 142 (75-206)               |                                 | 6 (3-9)                            |                              | 1 (1-2)              |                           | 0 (0-0)                      |                                   |

Hib = *Haemophilus influenzae* type b; nppm = non-pneumonia, non-meningitis; HIV = HIV-infected cases only; UR = uncertainty range



| Year | State           | Hib pneumonia deaths (UR) | Hib pneumonia deaths; HIV (UR) | Hib pneumonia mortality rate (UR) | Hib pneumonia mortality rate; HIV (UR) | Hib meningitis deaths (UR) | Hib meningitis deaths; HIV (UR) | Hib meningitis mortality rate (UR) | Hib meningitis mortality rate; HIV (UR) | Hib NPNM deaths (UR) | Hib NPNM deaths; HIV (UR) | Hib NPNM mortality rate (UR) | Hib NPNM mortality rate; HIV (UR) |
|------|-----------------|---------------------------|--------------------------------|-----------------------------------|----------------------------------------|----------------------------|---------------------------------|------------------------------------|-----------------------------------------|----------------------|---------------------------|------------------------------|-----------------------------------|
| 2010 | Punjab          | 394 (277-517)             |                                | 16 (12-22)                        |                                        | 129 (66-188)               |                                 | 5 (3-8)                            |                                         | 1 (1-1)              |                           | 0 (0-0)                      |                                   |
| 2011 | Punjab          | 361 (254-474)             |                                | 15 (11-20)                        |                                        | 118 (62-172)               |                                 | 5 (3-7)                            |                                         | 1 (0-1)              |                           | 0 (0-0)                      |                                   |
| 2012 | Punjab          | 330 (232-433)             |                                | 14 (10-18)                        |                                        | 107 (57-157)               |                                 | 5 (2-7)                            |                                         | 1 (0-1)              |                           | 0 (0-0)                      |                                   |
| 2013 | Punjab          | 307 (216-403)             |                                | 13 (9-17)                         |                                        | 98 (53-147)                |                                 | 4 (2-6)                            |                                         | 1 (0-1)              |                           | 0 (0-0)                      |                                   |
| 2014 | Punjab          | 287 (202-377)             |                                | 12 (9-16)                         |                                        | 90 (27-132)                |                                 | 4 (1-6)                            |                                         | 1 (0-1)              |                           | 0 (0-0)                      |                                   |
| 2015 | Punjab          | 46 (32-60)                | 0 (0-0)                        | 2 (1-3)                           | 0 (0-0)                                | 14 (4-21)                  | 0 (0-0)                         | 6 (0-1)                            | 0 (0-0)                                 | 0 (0-0)              | 0 (0-0)                   | 0 (0-0)                      | 0 (0-0)                           |
| 2010 | Rajasthan       | 5099 (3586-6699)          |                                | 62 (44-81)                        |                                        | 1761 (706-2678)            |                                 | 21 (9-33)                          |                                         | 7 (3-11)             |                           | 0 (0-0)                      |                                   |
| 2011 | Rajasthan       | 4892 (3441-6428)          |                                | 59 (42-78)                        |                                        | 1690 (708-2570)            |                                 | 20 (9-31)                          |                                         | 7 (3-10)             |                           | 0 (0-0)                      |                                   |
| 2012 | Rajasthan       | 4679 (3291-6148)          |                                | 56 (40-74)                        |                                        | 1616 (677-2458)            |                                 | 19 (8-30)                          |                                         | 7 (3-10)             |                           | 0 (0-0)                      |                                   |
| 2013 | Rajasthan       | 4447 (3128-5843)          |                                | 53 (38-70)                        |                                        | 1535 (644-2336)            |                                 | 18 (8-28)                          |                                         | 6 (3-10)             |                           | 0 (0-0)                      |                                   |
| 2014 | Rajasthan       | 4207 (2959-5527)          |                                | 51 (36-66)                        |                                        | 1451 (609-2209)            |                                 | 17 (7-27)                          |                                         | 6 (2-9)              |                           | 0 (0-0)                      |                                   |
| 2015 | Rajasthan       | 3952 (2780-5193)          |                                | 48 (33-62)                        |                                        | 1361 (581-2063)            |                                 | 16 (7-25)                          |                                         | 6 (2-8)              |                           | 0 (0-0)                      |                                   |
| 2010 | Rajasthan       | 3702 (2604-4865)          |                                | 45 (31-58)                        |                                        | 1273 (553-1920)            |                                 | 15 (7-23)                          |                                         | 5 (2-8)              |                           | 0 (0-0)                      |                                   |
| 2011 | Rajasthan       | 3437 (2417-4515)          |                                | 41 (29-54)                        |                                        | 1181 (522-1770)            |                                 | 14 (6-21)                          |                                         | 5 (2-7)              |                           | 0 (0-0)                      |                                   |
| 2012 | Rajasthan       | 3191 (2244-4192)          |                                | 39 (27-51)                        |                                        | 1095 (485-1644)            |                                 | 13 (6-20)                          |                                         | 4 (2-7)              |                           | 0 (0-0)                      |                                   |
| 2013 | Rajasthan       | 2960 (2082-3889)          |                                | 36 (25-47)                        |                                        | 1016 (418-1561)            |                                 | 12 (5-19)                          |                                         | 4 (3-12)             |                           | 0 (0-0)                      |                                   |
| 2014 | Rajasthan       | 2731 (1921-3589)          |                                | 33 (23-44)                        |                                        | 938 (385-1441)             |                                 | 11 (5-18)                          |                                         | 3 (1-11)             |                           | 0 (0-0)                      |                                   |
| 2015 | Rajasthan       | 2518 (1771-3308)          |                                | 31 (22-41)                        |                                        | 865 (355-1328)             |                                 | 11 (4-16)                          |                                         | 3 (1-11)             |                           | 0 (0-0)                      |                                   |
| 2010 | Rajasthan       | 2303 (1620-3026)          |                                | 29 (20-38)                        |                                        | 791 (325-1215)             |                                 | 10 (4-15)                          |                                         | 3 (1-10)             |                           | 0 (0-0)                      |                                   |
| 2011 | Rajasthan       | 2141 (1506-2814)          |                                | 27 (19-35)                        |                                        | 736 (302-1130)             |                                 | 9 (4-14)                           |                                         | 3 (1-11)             |                           | 0 (0-0)                      |                                   |
| 2012 | Rajasthan       | 1867 (1313-2453)          |                                | 24 (17-31)                        |                                        | 641 (263-985)              |                                 | 8 (3-12)                           |                                         | 3 (1-11)             |                           | 0 (0-0)                      |                                   |
| 2015 | Rajasthan       | 1888 (132-247)            | 0 (0-1)                        | 2 (2-3)                           | 0 (0-0)                                | 65 (27-99)                 | 0 (0-0)                         | 1 (0-1)                            | 0 (0-0)                                 | 1 (0-1)              | 0 (0-0)                   | 0 (0-0)                      | 0 (0-0)                           |
| 2010 | Sikkim          | 14 (10-19)                |                                | 23 (16-31)                        |                                        | 5 (2-7)                    |                                 | 8 (3-12)                           |                                         | 0 (0-0)              |                           | 0 (0-0)                      |                                   |
| 2011 | Sikkim          | 13 (9-17)                 |                                | 22 (16-29)                        |                                        | 5 (2-7)                    |                                 | 8 (3-12)                           |                                         | 0 (0-0)              |                           | 0 (0-0)                      |                                   |
| 2012 | Sikkim          | 12 (9-16)                 |                                | 21 (15-28)                        |                                        | 4 (2-6)                    |                                 | 7 (3-11)                           |                                         | 0 (0-0)              |                           | 0 (0-0)                      |                                   |
| 2013 | Sikkim          | 11 (8-15)                 |                                | 20 (14-26)                        |                                        | 4 (2-6)                    |                                 | 7 (3-10)                           |                                         | 0 (0-0)              |                           | 0 (0-0)                      |                                   |
| 2014 | Sikkim          | 10 (7-14)                 |                                | 19 (13-24)                        |                                        | 4 (2-5)                    |                                 | 6 (3-10)                           |                                         | 0 (0-0)              |                           | 0 (0-0)                      |                                   |
| 2015 | Sikkim          | 10 (7-13)                 |                                | 17 (12-23)                        |                                        | 3 (1-5)                    |                                 | 6 (2-9)                            |                                         | 0 (0-0)              |                           | 0 (0-0)                      |                                   |
| 2010 | Sikkim          | 9 (6-11)                  |                                | 16 (11-21)                        |                                        | 3 (1-5)                    |                                 | 6 (2-9)                            |                                         | 0 (0-0)              |                           | 0 (0-0)                      |                                   |
| 2011 | Sikkim          | 8 (6-11)                  |                                | 15 (11-20)                        |                                        | 3 (1-5)                    |                                 | 5 (2-9)                            |                                         | 0 (0-0)              |                           | 0 (0-0)                      |                                   |
| 2012 | Sikkim          | 8 (5-10)                  |                                | 15 (10-19)                        |                                        | 3 (1-4)                    |                                 | 5 (2-8)                            |                                         | 0 (0-0)              |                           | 0 (0-0)                      |                                   |
| 2013 | Sikkim          | 7 (5-9)                   |                                | 14 (10-19)                        |                                        | 3 (1-4)                    |                                 | 5 (2-8)                            |                                         | 0 (0-0)              |                           | 0 (0-0)                      |                                   |
| 2014 | Sikkim          | 7 (5-9)                   |                                | 14 (10-19)                        |                                        | 2 (1-4)                    |                                 | 5 (2-8)                            |                                         | 0 (0-0)              |                           | 0 (0-0)                      |                                   |
| 2015 | Sikkim          | 7 (5-9)                   |                                | 15 (10-19)                        |                                        | 2 (1-4)                    |                                 | 5 (2-8)                            |                                         | 0 (0-0)              |                           | 0 (0-0)                      |                                   |
| 2010 | Sikkim          | 7 (5-9)                   |                                | 15 (10-19)                        |                                        | 2 (1-4)                    |                                 | 5 (2-8)                            |                                         | 0 (0-0)              |                           | 0 (0-0)                      |                                   |
| 2011 | Sikkim          | 7 (5-9)                   |                                | 15 (10-19)                        |                                        | 2 (1-4)                    |                                 | 5 (2-8)                            |                                         | 0 (0-0)              |                           | 0 (0-0)                      |                                   |
| 2012 | Sikkim          | 7 (5-9)                   |                                | 15 (10-19)                        |                                        | 2 (1-4)                    |                                 | 5 (2-8)                            |                                         | 0 (0-0)              |                           | 0 (0-0)                      |                                   |
| 2013 | Sikkim          | 7 (5-9)                   |                                | 15 (11-20)                        |                                        | 2 (0-4)                    |                                 | 5 (1-8)                            |                                         | 0 (0-0)              |                           | 0 (0-0)                      |                                   |
| 2014 | Sikkim          | 7 (5-9)                   |                                | 16 (11-20)                        |                                        | 2 (0-4)                    |                                 | 5 (1-9)                            |                                         | 0 (0-0)              |                           | 0 (0-0)                      |                                   |
| 2015 | Sikkim          | 6 (4-8)                   | 0 (0-0)                        | 14 (10-18)                        | 0 (0-0)                                | 2 (0-3)                    | 0 (0-0)                         | 5 (1-8)                            | 0 (0-0)                                 | 0 (0-0)              | 0 (0-0)                   | 0 (0-0)                      | 0 (0-0)                           |
| 2010 | Tamil Nadu      | 1356 (954-1782)           |                                | 23 (16-31)                        |                                        | 464 (197-706)              |                                 | 8 (3-12)                           |                                         | 4 (2-6)              |                           | 0 (0-0)                      |                                   |
| 2011 | Tamil Nadu      | 1294 (910-1700)           |                                | 22 (16-29)                        |                                        | 443 (188-674)              |                                 | 8 (3-12)                           |                                         | 4 (2-5)              |                           | 0 (0-0)                      |                                   |
| 2012 | Tamil Nadu      | 1227 (863-1613)           |                                | 21 (15-27)                        |                                        | 420 (179-639)              |                                 | 7 (3-11)                           |                                         | 3 (1-5)              |                           | 0 (0-0)                      |                                   |
| 2013 | Tamil Nadu      | 1160 (816-1525)           |                                | 20 (14-26)                        |                                        | 396 (169-604)              |                                 | 7 (3-10)                           |                                         | 3 (1-5)              |                           | 0 (0-0)                      |                                   |
| 2014 | Tamil Nadu      | 1091 (767-1434)           |                                | 18 (13-24)                        |                                        | 372 (159-568)              |                                 | 6 (3-10)                           |                                         | 3 (1-5)              |                           | 0 (0-0)                      |                                   |
| 2015 | Tamil Nadu      | 1017 (715-1336)           |                                | 17 (12-23)                        |                                        | 346 (151-523)              |                                 | 6 (3-9)                            |                                         | 3 (1-4)              |                           | 0 (0-0)                      |                                   |
| 2010 | Tamil Nadu      | 945 (664-1241)            |                                | 16 (11-21)                        |                                        | 321 (144-480)              |                                 | 5 (2-8)                            |                                         | 3 (1-4)              |                           | 0 (0-0)                      |                                   |
| 2011 | Tamil Nadu      | 867 (610-1140)            |                                | 15 (10-19)                        |                                        | 294 (136-435)              |                                 | 5 (2-7)                            |                                         | 2 (1-3)              |                           | 0 (0-0)                      |                                   |
| 2012 | Tamil Nadu      | 798 (561-1048)            |                                | 13 (9-18)                         |                                        | 269 (125-400)              |                                 | 5 (2-7)                            |                                         | 2 (1-3)              |                           | 0 (0-0)                      |                                   |
| 2013 | Tamil Nadu      | 734 (516-964)             |                                | 12 (9-16)                         |                                        | 247 (113-372)              |                                 | 4 (2-6)                            |                                         | 2 (1-3)              |                           | 0 (0-0)                      |                                   |
| 2014 | Tamil Nadu      | 671 (472-882)             |                                | 11 (8-15)                         |                                        | 225 (101-343)              |                                 | 4 (2-6)                            |                                         | 2 (1-3)              |                           | 0 (0-0)                      |                                   |
| 2015 | Tamil Nadu      | 611 (430-803)             |                                | 10 (7-14)                         |                                        | 203 (41-330)               |                                 | 3 (1-6)                            |                                         | 2 (0-3)              |                           | 0 (0-0)                      |                                   |
| 2010 | Tamil Nadu      | 135 (95-177)              |                                | 2 (2-3)                           |                                        | 45 (9-73)                  |                                 | 1 (0-1)                            |                                         | 0 (0-1)              |                           | 0 (0-0)                      |                                   |
| 2011 | Tamil Nadu      | 54 (38-71)                |                                | 1 (1-1)                           |                                        | 18 (4-29)                  |                                 | 0 (0-1)                            |                                         | 0 (0-1)              |                           | 0 (0-0)                      |                                   |
| 2012 | Tamil Nadu      | 44 (31-57)                |                                | 1 (1-1)                           |                                        | 14 (3-24)                  |                                 | 0 (0-0)                            |                                         | 0 (0-0)              |                           | 0 (0-0)                      |                                   |
| 2013 | Tamil Nadu      | 35 (25-46)                | 0 (0-0)                        | 1 (0-1)                           | 0 (0-0)                                | 12 (2-19)                  | 0 (0-0)                         | 0 (0-0)                            | 0 (0-0)                                 | 0 (0-0)              | 0 (0-0)                   | 0 (0-0)                      | 0 (0-0)                           |
| 2014 | Tamil Nadu      | 72 (51-94)                |                                | 22 (15-28)                        |                                        | 25 (9-39)                  |                                 | 8 (3-12)                           |                                         | 0 (0-0)              |                           | 0 (0-0)                      |                                   |
| 2015 | Tamil Nadu      | 65 (46-85)                |                                | 19 (14-25)                        |                                        | 23 (8-36)                  |                                 | 7 (2-11)                           |                                         | 0 (0-0)              |                           | 0 (0-0)                      |                                   |
| 2010 | Tripura         | 59 (42-78)                |                                | 17 (12-23)                        |                                        | 21 (8-33)                  |                                 | 6 (2-10)                           |                                         | 0 (0-0)              |                           | 0 (0-0)                      |                                   |
| 2011 | Tripura         | 54 (38-71)                |                                | 16 (11-21)                        |                                        | 19 (7-30)                  |                                 | 5 (2-9)                            |                                         | 0 (0-0)              |                           | 0 (0-0)                      |                                   |
| 2012 | Tripura         | 49 (35-65)                |                                | 14 (10-19)                        |                                        | 17 (6-27)                  |                                 | 5 (2-8)                            |                                         | 0 (0-0)              |                           | 0 (0-0)                      |                                   |
| 2013 | Tripura         | 45 (32-60)                |                                | 13 (9-17)                         |                                        | 16 (6-25)                  |                                 | 5 (2-7)                            |                                         | 0 (0-0)              |                           | 0 (0-0)                      |                                   |
| 2014 | Tripura         | 42 (30-55)                |                                | 12 (8-16)                         |                                        | 15 (6-23)                  |                                 | 4 (2-6)                            |                                         | 0 (0-0)              |                           | 0 (0-0)                      |                                   |
| 2015 | Tripura         | 40 (28-52)                |                                | 11 (8-15)                         |                                        | 14 (5-21)                  |                                 | 4 (2-6)                            |                                         | 0 (0-0)              |                           | 0 (0-0)                      |                                   |
| 2010 | Tripura         | 37 (26-48)                |                                | 10 (7-14)                         |                                        | 13 (5-20)                  |                                 | 4 (1-5)                            |                                         | 0 (0-0)              |                           | 0 (0-0)                      |                                   |
| 2011 | Tripura         | 35 (24-46)                |                                | 10 (7-13)                         |                                        | 12 (5-18)                  |                                 | 3 (1-5)                            |                                         | 0 (0-0)              |                           | 0 (0-0)                      |                                   |
| 2012 | Tripura         | 33 (23-43)                |                                | 9 (6-12)                          |                                        | 11 (5-17)                  |                                 | 3 (1-5)                            |                                         | 0 (0-0)              |                           | 0 (0-0)                      |                                   |
| 2013 | Tripura         | 32 (22-42)                |                                | 9 (6-12)                          |                                        | 11 (5-16)                  |                                 | 3 (1-4)                            |                                         | 0 (0-0)              |                           | 0 (0-0)                      |                                   |
| 2014 | Tripura         | 29 (21-38)                |                                | 8 (6-11)                          |                                        | 10 (5-14)                  |                                 | 3 (1-4)                            |                                         | 0 (0-0)              |                           | 0 (0-0)                      |                                   |
| 2015 | Tripura         | 27 (19-36)                |                                | 8 (5-10)                          |                                        | 9 (4-13)                   |                                 | 2 (1-4)                            |                                         | 0 (0-0)              |                           | 0 (0-0)                      |                                   |
| 2010 | Tripura         | 24 (17-32)                |                                | 7 (5-9)                           |                                        | 8 (2-12)                   |                                 | 2 (1-3)                            |                                         | 0 (0-0)              |                           | 0 (0-0)                      |                                   |
| 2011 | Tripura         | 21 (15-27)                | 0 (0-0)                        | 6 (4-8)                           | 0 (0-0)                                | 7 (2-10)                   | 0 (0-0)                         | 2 (0-3)                            | 0 (0-0)                                 | 0 (0-0)              | 0 (0-0)                   | 0 (0-0)                      | 0 (0-0)                           |
| 2010 | Union Territory | 49 (34-64)                |                                | 18 (12-23)                        |                                        | 16 (7-25)                  |                                 | 6 (2-9)                            |                                         | 0 (0-0)              |                           | 0 (0-0)                      |                                   |
| 2011 | Union Territory | 47 (33-61)                |                                | 17 (12-22)                        |                                        | 15 (6-24)                  |                                 | 5 (2-8)                            |                                         | 0 (0-0)              |                           | 0 (0-0)                      |                                   |
| 2012 | Union Territory | 44 (31-58)                |                                | 16 (11-21)                        |                                        | 15 (6-23)                  |                                 | 5 (2-8)                            |                                         | 0 (0-0)              |                           | 0 (0-0)                      |                                   |
| 2013 | Union Territory | 43 (30-56)                |                                | 15 (10-20)                        |                                        | 14 (5-22)                  |                                 | 5 (2-8)                            |                                         | 0 (0-0)              |                           | 0 (0-0)                      |                                   |
| 2014 | Union Territory | 41 (29-54)                |                                | 14 (10-19)                        |                                        | 13 (5-21)                  |                                 | 5 (2-7)                            |                                         | 0 (0-0)              |                           | 0 (0-0)                      |                                   |
| 2015 | Union Territory | 39 (27-51)                |                                | 13 (9-18)                         |                                        | 13 (4-20)                  |                                 | 4 (2-7)                            |                                         | 0 (0-0)              |                           | 0 (0-0)                      |                                   |
| 2010 | Union Territory | 37 (26-49)                |                                | 13 (9-17)                         |                                        | 12 (5-18)                  |                                 | 4 (2-6)                            |                                         | 0 (0-0)              |                           | 0 (0-0)                      |                                   |
| 2011 | Union Territory | 36 (25-47)                |                                | 12 (9-16)                         |                                        | 11 (5-16)                  |                                 | 4 (2-6)                            |                                         | 0 (0-0)              |                           | 0 (0-0)                      |                                   |
| 2012 | Union Territory | 34 (24-45)                |                                | 12 (8-15)                         |                                        | 10 (4-16)                  |                                 | 4 (1-5)                            |                                         | 0 (0-0)              |                           | 0 (0-0)                      |                                   |
| 2013 | Union Territory | 33 (23-43)                |                                | 11 (8-15)                         |                                        | 10 (4-15)                  |                                 | 3 (1-5)                            |                                         | 0 (0-0)              |                           | 0 (0-0)                      |                                   |
| 2014 | Union Territory | 31 (22-41)                |                                | 11 (7-14)                         |                                        | 9 (4-15)                   |                                 | 3 (1-5)                            |                                         | 0 (0-0)              |                           | 0 (0-0)                      |                                   |
| 2015 | Union Territory | 30 (21-40)                |                                | 10 (7-14)                         |                                        | 9 (3-14)                   |                                 | 3 (1-5)                            |                                         | 0 (0-0)              |                           | 0 (0-0)                      |                                   |
| 2010 | Union Territory | 29 (20-38)                |                                | 10 (7-13)                         |                                        | 8 (3-13)                   |                                 | 3 (1-5)                            |                                         | 0 (0-0)              |                           | 0 (0-0)                      |                                   |
| 2011 | Union Territory | 22 (15-29)                |                                | 7 (5-10)                          |                                        | 6 (3-10)                   |                                 | 2 (1-3)                            |                                         | 0 (0-0)              |                           | 0 (0-0)                      |                                   |
| 2012 | Union Territory | 20 (14-26)                |                                | 7 (5-9)                           |                                        | 6 (2-9)                    |                                 | 2 (1-3)                            |                                         | 0 (0-0)              |                           | 0 (0-0)                      |                                   |
| 2013 | Union Territory | 7 (5-10)                  |                                | 3 (2-3)                           | 0 (0-0)                                | 2 (1-4)                    | 0 (0-0)                         | 1 (0-1)                            | 0 (0-0)                                 | 0 (0-0)              | 0 (0-0)                   | 0 (0-0)                      | 0 (0-0)                           |
| 2014 | Union Territory | 7 (5-10)                  |                                | 3 (2-3)                           | 0 (0-0)                                | 2 (1-4)                    | 0 (0-0)                         | 1 (0-1)                            | 0 (0-0)                                 | 0 (0-0)              | 0 (0-0)                   | 0 (0-0)                      | 0 (0-0)                           |
| 2015 | Union Territory | 7 (5-10)                  |                                | 3 (2-3)                           | 0 (0-0)                                | 2 (1-4)                    | 0 (0-0)                         | 1 (0-1)                            | 0 (0-0)                                 | 0 (0-0)              | 0 (0-0)                   | 0 (0-0)                      | 0 (0-0)                           |
| 2010 | Uttar Pradesh   | 17458 (12279-22939)       |                                | 74 (62-97)                        |                                        | 5950                       |                                 |                                    |                                         |                      |                           |                              |                                   |

| Year | State         | Hib pneumonia deaths (UR) | Hib pneumonia deaths; HIV (UR) | Hib pneumonia mortality rate (UR) | Hib pneumonia mortality rate; HIV (UR) | Hib meningitis deaths (UR) | Hib meningitis deaths; HIV (UR) | Hib meningitis mortality rate (UR) | Hib mortality rate; HIV (UR) | Hib NPNM deaths (UR) | Hib NPNM deaths; HIV (UR) | Hib NPNM mortality rate (UR) | Hib NPNM mortality rate; HIV (UR) |
|------|---------------|---------------------------|--------------------------------|-----------------------------------|----------------------------------------|----------------------------|---------------------------------|------------------------------------|------------------------------|----------------------|---------------------------|------------------------------|-----------------------------------|
| 2001 | Uttar Pradesh | 16731 (11767-21983)       |                                | 71 (50-93)                        |                                        | 5702 (2632-8493)           |                                 | 24 (11-36)                         |                              | 23 (11-35)           |                           | 0 (0-0)                      |                                   |
| 2002 | Uttar Pradesh | 15988 (11245-21007)       |                                | 67 (47-88)                        |                                        | 5449 (2515-8116)           |                                 | 23 (11-34)                         |                              | 22 (10-33)           |                           | 0 (0-0)                      |                                   |
| 2003 | Uttar Pradesh | 15266 (10737-20059)       |                                | 64 (45-85)                        |                                        | 5205 (2401-7749)           |                                 | 22 (10-33)                         |                              | 21 (10-32)           |                           | 0 (0-0)                      |                                   |
| 2004 | Uttar Pradesh | 14527 (10217-19087)       |                                | 61 (43-81)                        |                                        | 4956 (2285-7374)           |                                 | 21 (10-31)                         |                              | 20 (9-30)            |                           | 0 (0-0)                      |                                   |
| 2005 | Uttar Pradesh | 13734 (9659-18045)        |                                | 58 (41-77)                        |                                        | 4689 (2142-6998)           |                                 | 20 (9-30)                          |                              | 19 (9-29)            |                           | 0 (0-0)                      |                                   |
| 2006 | Uttar Pradesh | 12984 (9132-17060)        |                                | 55 (39-73)                        |                                        | 4437 (2008-6640)           |                                 | 19 (9-28)                          |                              | 18 (8-27)            |                           | 0 (0-0)                      |                                   |
| 2007 | Uttar Pradesh | 12174 (8552-15996)        |                                | 52 (37-69)                        |                                        | 4164 (1866-6249)           |                                 | 18 (8-27)                          |                              | 17 (8-25)            |                           | 0 (0-0)                      |                                   |
| 2008 | Uttar Pradesh | 11405 (8021-14985)        |                                | 49 (34-64)                        |                                        | 3904 (1749-5654)           |                                 | 17 (8-25)                          |                              | 16 (7-24)            |                           | 0 (0-0)                      |                                   |
| 2009 | Uttar Pradesh | 10684 (7515-14039)        |                                | 46 (33-61)                        |                                        | 3659 (1638-5484)           |                                 | 16 (7-24)                          |                              | 15 (7-22)            |                           | 0 (0-0)                      |                                   |
| 2010 | Uttar Pradesh | 9956 (7002-13082)         |                                | 43 (31-57)                        |                                        | 3411 (1526-5110)           |                                 | 15 (7-22)                          |                              | 14 (6-21)            |                           | 0 (0-0)                      |                                   |
| 2011 | Uttar Pradesh | 9261 (6513-12168)         |                                | 41 (29-54)                        |                                        | 3174 (1320-4864)           |                                 | 14 (6-21)                          |                              | 25 (11-39)           |                           | 0 (0-0)                      |                                   |
| 2012 | Uttar Pradesh | 8524 (5995-11201)         |                                | 38 (27-50)                        |                                        | 2923 (1215-4478)           |                                 | 13 (5-20)                          |                              | 23 (10-36)           |                           | 0 (0-0)                      |                                   |
| 2013 | Uttar Pradesh | 7941 (5585-10434)         |                                | 36 (25-47)                        |                                        | 2724 (1132-4171)           |                                 | 12 (5-19)                          |                              | 22 (9-33)            |                           | 0 (0-0)                      |                                   |
| 2014 | Uttar Pradesh | 7357 (5174-9667)          |                                | 34 (24-44)                        |                                        | 2524 (1049-3864)           |                                 | 12 (5-18)                          |                              | 20 (8-31)            |                           | 0 (0-0)                      |                                   |
| 2015 | Uttar Pradesh | 6913 (4862-9083)          | 17 (12-23)                     | 32 (22-42)                        | 0 (0-0)                                | 2372 (985-3631)            | 6 (3-10)                        | 11 (5-17)                          | 0 (0-0)                      | 19 (8-29)            | 0 (0-0)                   | 0 (0-0)                      | 0 (0-0)                           |
| 2000 | Uttarakhand   | 389 (274-511)             |                                | 37 (26-49)                        |                                        | 133 (61-198)               |                                 | 13 (6-19)                          |                              | 1 (0-1)              |                           | 0 (0-0)                      |                                   |
| 2001 | Uttarakhand   | 372 (262-489)             |                                | 35 (25-46)                        |                                        | 127 (58-189)               |                                 | 12 (6-18)                          |                              | 1 (0-1)              |                           | 0 (0-0)                      |                                   |
| 2002 | Uttarakhand   | 355 (250-466)             |                                | 34 (24-44)                        |                                        | 121 (56-180)               |                                 | 11 (5-17)                          |                              | 0 (0-1)              |                           | 0 (0-0)                      |                                   |
| 2003 | Uttarakhand   | 338 (238-444)             |                                | 32 (22-42)                        |                                        | 116 (49-176)               |                                 | 11 (5-17)                          |                              | 1 (0-1)              |                           | 0 (0-0)                      |                                   |
| 2004 | Uttarakhand   | 321 (226-422)             |                                | 30 (21-40)                        |                                        | 110 (47-167)               |                                 | 10 (4-16)                          |                              | 1 (0-1)              |                           | 0 (0-0)                      |                                   |
| 2005 | Uttarakhand   | 303 (213-398)             |                                | 29 (20-38)                        |                                        | 104 (43-160)               |                                 | 10 (4-15)                          |                              | 1 (0-1)              |                           | 0 (0-0)                      |                                   |
| 2006 | Uttarakhand   | 286 (201-376)             |                                | 27 (19-36)                        |                                        | 99 (39-153)                |                                 | 9 (4-14)                           |                              | 1 (0-1)              |                           | 0 (0-0)                      |                                   |
| 2007 | Uttarakhand   | 268 (188-352)             |                                | 25 (18-33)                        |                                        | 93 (35-145)                |                                 | 9 (3-14)                           |                              | 1 (0-1)              |                           | 0 (0-0)                      |                                   |
| 2008 | Uttarakhand   | 251 (176-330)             |                                | 24 (17-31)                        |                                        | 87 (33-136)                |                                 | 8 (3-13)                           |                              | 1 (0-1)              |                           | 0 (0-0)                      |                                   |
| 2009 | Uttarakhand   | 234 (164-307)             |                                | 22 (16-29)                        |                                        | 81 (31-127)                |                                 | 8 (3-12)                           |                              | 1 (0-1)              |                           | 0 (0-0)                      |                                   |
| 2010 | Uttarakhand   | 215 (152-283)             |                                | 21 (15-27)                        |                                        | 75 (28-117)                |                                 | 7 (3-11)                           |                              | 1 (0-1)              |                           | 0 (0-0)                      |                                   |
| 2011 | Uttarakhand   | 196 (138-258)             |                                | 19 (13-25)                        |                                        | 68 (26-106)                |                                 | 7 (3-10)                           |                              | 1 (0-1)              |                           | 0 (0-0)                      |                                   |
| 2012 | Uttarakhand   | 174 (122-229)             |                                | 17 (12-22)                        |                                        | 60 (23-94)                 |                                 | 6 (2-9)                            |                              | 0 (0-1)              |                           | 0 (0-0)                      |                                   |
| 2013 | Uttarakhand   | 155 (109-203)             |                                | 15 (11-20)                        |                                        | 54 (20-84)                 |                                 | 5 (2-8)                            |                              | 0 (0-1)              |                           | 0 (0-0)                      |                                   |
| 2014 | Uttarakhand   | 136 (95-178)              |                                | 14 (10-18)                        |                                        | 47 (18-74)                 |                                 | 5 (2-7)                            |                              | 0 (0-1)              |                           | 0 (0-0)                      |                                   |
| 2015 | Uttarakhand   | 20 (14-26)                | 0 (0-0)                        | 2 (1-3)                           | 0 (0-0)                                | 7 (3-11)                   | 0 (0-0)                         | 1 (0-1)                            | 0 (0-0)                      | 0 (0-0)              | 0 (0-0)                   | 0 (0-0)                      | 0 (0-0)                           |
| 2000 | West Bengal   | 2965 (2085-3895)          |                                | 34 (24-45)                        |                                        | 1009 (442-1525)            |                                 | 12 (5-18)                          |                              | 8 (4-12)             |                           | 0 (0-0)                      |                                   |
| 2001 | West Bengal   | 2708 (1905-3559)          |                                | 31 (22-41)                        |                                        | 922 (404-1393)             |                                 | 11 (5-16)                          |                              | 7 (3-11)             |                           | 0 (0-0)                      |                                   |
| 2002 | West Bengal   | 2438 (1715-3203)          |                                | 28 (20-37)                        |                                        | 830 (364-1254)             |                                 | 10 (4-14)                          |                              | 7 (3-10)             |                           | 0 (0-0)                      |                                   |
| 2003 | West Bengal   | 2203 (1549-2894)          |                                | 25 (18-33)                        |                                        | 750 (329-1133)             |                                 | 9 (4-13)                           |                              | 6 (3-9)              |                           | 0 (0-0)                      |                                   |
| 2004 | West Bengal   | 2005 (1410-2634)          |                                | 23 (16-31)                        |                                        | 682 (299-1031)             |                                 | 8 (3-12)                           |                              | 5 (2-8)              |                           | 0 (0-0)                      |                                   |
| 2005 | West Bengal   | 1830 (1287-2404)          |                                | 21 (15-28)                        |                                        | 622 (274-939)              |                                 | 7 (3-11)                           |                              | 5 (2-7)              |                           | 0 (0-0)                      |                                   |
| 2006 | West Bengal   | 1676 (1179-2202)          |                                | 20 (14-26)                        |                                        | 570 (253-858)              |                                 | 7 (3-10)                           |                              | 5 (2-7)              |                           | 0 (0-0)                      |                                   |
| 2007 | West Bengal   | 1527 (1074-2007)          |                                | 18 (13-24)                        |                                        | 519 (231-779)              |                                 | 6 (3-9)                            |                              | 4 (2-6)              |                           | 0 (0-0)                      |                                   |
| 2008 | West Bengal   | 1383 (973-1817)           |                                | 16 (12-22)                        |                                        | 469 (209-706)              |                                 | 6 (2-8)                            |                              | 4 (2-6)              |                           | 0 (0-0)                      |                                   |
| 2009 | West Bengal   | 1251 (850-1643)           |                                | 15 (11-20)                        |                                        | 424 (191-636)              |                                 | 5 (2-8)                            |                              | 3 (2-5)              |                           | 0 (0-0)                      |                                   |
| 2010 | West Bengal   | 1166 (820-1532)           |                                | 14 (10-19)                        |                                        | 395 (179-591)              |                                 | 5 (2-7)                            |                              | 3 (1-5)              |                           | 0 (0-0)                      |                                   |
| 2011 | West Bengal   | 1125 (791-1478)           |                                | 14 (10-18)                        |                                        | 381 (174-569)              |                                 | 5 (2-7)                            |                              | 3 (1-5)              |                           | 0 (0-0)                      |                                   |
| 2012 | West Bengal   | 1091 (767-1434)           |                                | 14 (10-18)                        |                                        | 369 (169-550)              |                                 | 5 (2-7)                            |                              | 3 (1-4)              |                           | 0 (0-0)                      |                                   |
| 2013 | West Bengal   | 1094 (769-1438)           |                                | 14 (10-18)                        |                                        | 370 (170-551)              |                                 | 5 (2-7)                            |                              | 3 (1-4)              |                           | 0 (0-0)                      |                                   |
| 2014 | West Bengal   | 1102 (775-1447)           |                                | 14 (10-19)                        |                                        | 372 (171-555)              |                                 | 5 (2-7)                            |                              | 3 (1-4)              |                           | 0 (0-0)                      |                                   |
| 2015 | West Bengal   | 176 (124-231)             | 0 (0-1)                        | 2 (2-3)                           | 0 (0-0)                                | 59 (27-88)                 | 0 (0-0)                         | 1 (0-1)                            | 0 (0-0)                      | 0 (0-1)              | 0 (0-0)                   | 0 (0-0)                      | 0 (0-0)                           |

Hib = *Haemophilus influenzae* type b; npnm = non-pneumonia, non-meningitis; HIV = HIV-infected cases only; UR = uncertainty range



| Year | State            | Spi pneumonia cases (UR) | Spi pneumonia cases: HV (UR) | Spi pneumonia incidence rate (UR) | Spi pneumonia incidence rate: HV (UR) | Spi severe pneumonia cases (UR) | Spi severe pneumonia cases: HV (UR) | Spi severe pneumonia incidence rate (UR) | Spi severe pneumonia incidence rate: HV (UR) | Spi meningitis cases (UR) | Spi meningitis cases: HV (UR) | Spi meningitis incidence rate (UR) | Spi meningitis incidence rate: HV (UR) | Spi NPMH cases (UR) | Spi NPMH cases: HV (UR) | Spi NPMH incidence rate (UR) | Spi NPMH incidence rate: HV (UR) |       |
|------|------------------|--------------------------|------------------------------|-----------------------------------|---------------------------------------|---------------------------------|-------------------------------------|------------------------------------------|----------------------------------------------|---------------------------|-------------------------------|------------------------------------|----------------------------------------|---------------------|-------------------------|------------------------------|----------------------------------|-------|
| 2001 | Haryana          | 1068 (540-2016)          | 1042 (517-1932)              | 42 (27-77)                        | 41 (26-72)                            | 1068 (540-2016)                 | 1042 (517-1932)                     | 42 (27-77)                               | 41 (26-72)                                   | 437 (217-809)             | 418 (208-730)                 | 17 (8-31)                          | 17 (8-31)                              |                     |                         |                              |                                  |       |
| 2002 | Haryana          | 1003 (488-1859)          | 977 (468-1809)               | 38 (19-71)                        | 37 (18-69)                            | 1003 (488-1859)                 | 977 (468-1809)                      | 38 (19-71)                               | 37 (18-69)                                   | 402 (200-746)             | 397 (197-730)                 | 15 (8-28)                          | 15 (8-28)                              |                     |                         |                              |                                  |       |
| 2003 | Haryana          | 944 (419-1760)           | 899 (434-1630)               | 35 (17-67)                        | 34 (16-60)                            | 944 (419-1760)                  | 899 (434-1630)                      | 35 (17-67)                               | 34 (16-60)                                   | 1072 (510-1999)           | 1021 (500-1818)               | 39 (19-76)                         | 39 (19-76)                             |                     |                         |                              |                                  |       |
| 2004 | Haryana          | 899 (484-1600)           | 851 (450-1504)               | 32 (17-57)                        | 31 (17-58)                            | 899 (484-1600)                  | 851 (450-1504)                      | 32 (17-57)                               | 31 (17-58)                                   | 966 (517-1708)            | 933 (454-1827)                | 36 (19-64)                         | 36 (19-64)                             |                     |                         |                              |                                  |       |
| 2005 | Haryana          | 851 (450-1504)           | 790 (400-1345)               | 29 (15-51)                        | 28 (14-49)                            | 851 (450-1504)                  | 790 (400-1345)                      | 29 (15-51)                               | 28 (14-49)                                   | 1021 (500-1818)           | 966 (517-1708)                | 39 (19-76)                         | 39 (19-76)                             |                     |                         |                              |                                  |       |
| 2006 | Haryana          | 790 (400-1345)           | 730 (379-1298)               | 28 (14-49)                        | 27 (13-50)                            | 790 (400-1345)                  | 730 (379-1298)                      | 28 (14-49)                               | 27 (13-50)                                   | 1072 (510-1999)           | 1021 (500-1818)               | 39 (19-76)                         | 39 (19-76)                             |                     |                         |                              |                                  |       |
| 2007 | Haryana          | 730 (379-1298)           | 679 (369-1215)               | 25 (12-47)                        | 24 (11-41)                            | 730 (379-1298)                  | 679 (369-1215)                      | 25 (12-47)                               | 24 (11-41)                                   | 966 (517-1708)            | 933 (454-1827)                | 36 (19-64)                         | 36 (19-64)                             |                     |                         |                              |                                  |       |
| 2008 | Haryana          | 679 (369-1215)           | 591 (300-1082)               | 23 (12-41)                        | 22 (11-41)                            | 679 (369-1215)                  | 591 (300-1082)                      | 23 (12-41)                               | 22 (11-41)                                   | 1021 (500-1818)           | 966 (517-1708)                | 39 (19-76)                         | 39 (19-76)                             |                     |                         |                              |                                  |       |
| 2009 | Haryana          | 591 (300-1082)           | 562 (303-1073)               | 22 (12-41)                        | 21 (12-41)                            | 591 (300-1082)                  | 562 (303-1073)                      | 22 (12-41)                               | 21 (12-41)                                   | 1072 (510-1999)           | 1021 (500-1818)               | 39 (19-76)                         | 39 (19-76)                             |                     |                         |                              |                                  |       |
| 2010 | Haryana          | 562 (303-1073)           | 526 (296-1049)               | 21 (12-41)                        | 20 (12-41)                            | 562 (303-1073)                  | 526 (296-1049)                      | 21 (12-41)                               | 20 (12-41)                                   | 966 (517-1708)            | 933 (454-1827)                | 36 (19-64)                         | 36 (19-64)                             |                     |                         |                              |                                  |       |
| 2011 | Haryana          | 526 (296-1049)           | 488 (269-949)                | 20 (12-41)                        | 19 (12-41)                            | 526 (296-1049)                  | 488 (269-949)                       | 20 (12-41)                               | 19 (12-41)                                   | 1021 (500-1818)           | 966 (517-1708)                | 39 (19-76)                         | 39 (19-76)                             |                     |                         |                              |                                  |       |
| 2012 | Haryana          | 488 (269-949)            | 452 (250-854)                | 19 (12-41)                        | 18 (12-41)                            | 488 (269-949)                   | 452 (250-854)                       | 19 (12-41)                               | 18 (12-41)                                   | 1072 (510-1999)           | 1021 (500-1818)               | 39 (19-76)                         | 39 (19-76)                             |                     |                         |                              |                                  |       |
| 2013 | Haryana          | 452 (250-854)            | 416 (228-783)                | 18 (12-41)                        | 17 (12-41)                            | 452 (250-854)                   | 416 (228-783)                       | 18 (12-41)                               | 17 (12-41)                                   | 966 (517-1708)            | 933 (454-1827)                | 36 (19-64)                         | 36 (19-64)                             |                     |                         |                              |                                  |       |
| 2014 | Haryana          | 416 (228-783)            | 380 (214-636)                | 17 (12-41)                        | 16 (12-41)                            | 416 (228-783)                   | 380 (214-636)                       | 17 (12-41)                               | 16 (12-41)                                   | 1021 (500-1818)           | 966 (517-1708)                | 39 (19-76)                         | 39 (19-76)                             |                     |                         |                              |                                  |       |
| 2015 | Haryana          | 380 (214-636)            | 344 (199-589)                | 16 (12-41)                        | 15 (12-41)                            | 380 (214-636)                   | 344 (199-589)                       | 16 (12-41)                               | 15 (12-41)                                   | 1072 (510-1999)           | 1021 (500-1818)               | 39 (19-76)                         | 39 (19-76)                             |                     |                         |                              |                                  |       |
| 2000 | Himachal Pradesh | 66487 (86477-72809)      | 618 (792-1091)               | 2356 (2295-3038)                  | 36 (31-43)                            | 26810 (20161-30954)             | 377 (283-430)                       | 1051 (787-1198)                          | 15 (11-17)                                   | 677 (644-1219)            | 661 (336-1191)                | 10 (6-18)                          | 10 (6-18)                              |                     |                         |                              | 0.0-1                            |       |
| 2001 | Himachal Pradesh | 24252 (20366-28876)      | 3768 (3277-4315)             | 961 (916-1185)                    | 14 (11-16)                            | 24252 (20366-28876)             | 3768 (3277-4315)                    | 961 (916-1185)                           | 14 (11-16)                                   | 687 (640-1203)            | 671 (341-1207)                | 10 (6-18)                          | 10 (6-18)                              |                     |                         |                              |                                  |       |
| 2002 | Himachal Pradesh |                          |                              |                                   |                                       |                                 |                                     |                                          |                                              |                           |                               |                                    |                                        |                     |                         |                              |                                  |       |
| 2003 | Himachal Pradesh |                          |                              |                                   |                                       |                                 |                                     |                                          |                                              |                           |                               |                                    |                                        |                     |                         |                              |                                  |       |
| 2004 | Himachal Pradesh |                          |                              |                                   |                                       |                                 |                                     |                                          |                                              |                           |                               |                                    |                                        |                     |                         |                              |                                  |       |
| 2005 | Himachal Pradesh |                          |                              |                                   |                                       |                                 |                                     |                                          |                                              |                           |                               |                                    |                                        |                     |                         |                              |                                  |       |
| 2006 | Himachal Pradesh |                          |                              |                                   |                                       |                                 |                                     |                                          |                                              |                           |                               |                                    |                                        |                     |                         |                              |                                  |       |
| 2007 | Himachal Pradesh |                          |                              |                                   |                                       |                                 |                                     |                                          |                                              |                           |                               |                                    |                                        |                     |                         |                              |                                  |       |
| 2008 | Himachal Pradesh |                          |                              |                                   |                                       |                                 |                                     |                                          |                                              |                           |                               |                                    |                                        |                     |                         |                              |                                  |       |
| 2009 | Himachal Pradesh |                          |                              |                                   |                                       |                                 |                                     |                                          |                                              |                           |                               |                                    |                                        |                     |                         |                              |                                  |       |
| 2010 | Himachal Pradesh |                          |                              |                                   |                                       |                                 |                                     |                                          |                                              |                           |                               |                                    |                                        |                     |                         |                              |                                  |       |
| 2011 | Himachal Pradesh |                          |                              |                                   |                                       |                                 |                                     |                                          |                                              |                           |                               |                                    |                                        |                     |                         |                              |                                  |       |
| 2012 | Himachal Pradesh |                          |                              |                                   |                                       |                                 |                                     |                                          |                                              |                           |                               |                                    |                                        |                     |                         |                              |                                  |       |
| 2013 | Himachal Pradesh |                          |                              |                                   |                                       |                                 |                                     |                                          |                                              |                           |                               |                                    |                                        |                     |                         |                              |                                  |       |
| 2014 | Himachal Pradesh |                          |                              |                                   |                                       |                                 |                                     |                                          |                                              |                           |                               |                                    |                                        |                     |                         |                              |                                  |       |
| 2015 | Himachal Pradesh |                          |                              |                                   |                                       |                                 |                                     |                                          |                                              |                           |                               |                                    |                                        |                     |                         |                              |                                  |       |
| 2000 | Jammu & Kashmir  | 12921 (11149-15360)      | 181 (158-215)                | 7245 (1937-2669)                  | 11 (97-37)                            | 5317 (3393-8054)                | 75 (65-85)                          | 624 (492-1054)                           | 13 (10-15)                                   | 119 (84-155)              | 2 (1-3)                       | 21 (13-34)                         | 0.0-1                                  |                     |                         |                              |                                  | 0.0-1 |
| 2001 | Jammu & Kashmir  | 48920 (42209-56152)      | 4634 (3998-5508)             |                                   |                                       | 20117 (15071-22945)             | 1905 (1428-2173)                    |                                          |                                              | 432 (220-712)             | 40 (24-64)                    | 479 (250-763)                      | 45 (24-72)                             |                     |                         |                              |                                  |       |
| 2002 | Jammu & Kashmir  |                          |                              |                                   |                                       |                                 |                                     |                                          |                                              | 396 (207-632)             | 36 (19-57)                    | 450 (235-717)                      | 41 (21-65)                             |                     |                         |                              |                                  |       |
| 2003 | Jammu & Kashmir  |                          |                              |                                   |                                       |                                 |                                     |                                          |                                              | 369 (193-600)             | 32 (17-51)                    | 420 (220-670)                      | 37 (19-58)                             |                     |                         |                              |                                  |       |
| 2004 | Jammu & Kashmir  |                          |                              |                                   |                                       |                                 |                                     |                                          |                                              | 340 (178-644)             | 28 (15-40)                    | 386 (203-620)                      | 33 (17-53)                             |                     |                         |                              |                                  |       |
| 2005 | Jammu & Kashmir  |                          |                              |                                   |                                       |                                 |                                     |                                          |                                              | 305 (163-547)             | 26 (13-40)                    | 347 (185-565)                      | 28 (15-46)                             |                     |                         |                              |                                  |       |
| 2006 | Jammu & Kashmir  |                          |                              |                                   |                                       |                                 |                                     |                                          |                                              | 289 (149-544)             | 21 (11-20)                    | 308 (168-516)                      | 24 (13-40)                             |                     |                         |                              |                                  |       |
| 2007 | Jammu & Kashmir  |                          |                              |                                   |                                       |                                 |                                     |                                          |                                              | 233 (124-412)             | 18 (9-31)                     | 267 (140-468)                      | 20 (10-35)                             |                     |                         |                              |                                  |       |
| 2008 | Jammu & Kashmir  |                          |                              |                                   |                                       |                                 |                                     |                                          |                                              | 208 (102-374)             | 15 (7-27)                     | 236 (118-425)                      | 17 (8-27)                              |                     |                         |                              |                                  |       |
| 2009 | Jammu & Kashmir  |                          |                              |                                   |                                       |                                 |                                     |                                          |                                              | 187 (93-340)              | 13 (6-24)                     | 212 (105-386)                      | 15 (7-27)                              |                     |                         |                              |                                  |       |
| 2010 | Jammu & Kashmir  |                          |                              |                                   |                                       |                                 |                                     |                                          |                                              | 169 (84-309)              | 11 (6-21)                     | 192 (94-351)                       | 13 (6-24)                              |                     |                         |                              |                                  |       |
| 2011 | Jammu & Kashmir  |                          |                              |                                   |                                       |                                 |                                     |                                          |                                              | 154 (77-292)              | 11 (6-21)                     | 175 (87-320)                       | 11 (6-21)                              |                     |                         |                              |                                  |       |
| 2012 | Jammu & Kashmir  |                          |                              |                                   |                                       |                                 |                                     |                                          |                                              | 139 (69-255)              | 9 (4-16)                      | 158 (79-289)                       | 10 (5-18)                              |                     |                         |                              |                                  |       |
| 2013 | Jammu & Kashmir  |                          |                              |                                   |                                       |                                 |                                     |                                          |                                              | 124 (62-208)              | 8 (4-14)                      | 140 (70-243)                       | 9 (4-16)                               |                     |                         |                              |                                  |       |
| 2014 | Jammu & Kashmir  |                          |                              |                                   |                                       |                                 |                                     |                                          |                                              | 111 (55-203)              | 7 (3-12)                      | 126 (63-230)                       | 8 (4-14)                               |                     |                         |                              |                                  |       |
| 2015 | Jammu & Kashmir  | 29329 (25206-34664)      | 411 (355-489)                | 1665 (1437-1979)                  | 23 (20-28)                            | 12073 (8045-13770)              | 169 (127-193)                       | 685 (513-782)                            | 10 (7-11)                                    | 96 (48-175)               | 1 (1-3)                       | 6 (3-10)                           | 0.0-0                                  |                     |                         |                              |                                  | 0.0-0 |
| 2000 | Jharkhand        | 225360 (194446-267890)   | 6120 (6291-7375)             |                                   |                                       | 92684 (84938-100715)            | 2517 (1888-2871)                    |                                          |                                              | 874 (386-1825)            | 24 (10-50)                    | 349 (147-732)                      | 16 (4-20)                              |                     |                         |                              |                                  |       |
| 2001 | Jharkhand        |                          |                              |                                   |                                       |                                 |                                     |                                          |                                              | 816 (313-1469)            | 23 (8-50)                     | 322 (165-623)                      | 16 (9-27)                              |                     |                         |                              |                                  |       |
| 2002 | Jharkhand        |                          |                              |                                   |                                       |                                 |                                     |                                          |                                              | 844 (305-1527)            | 22 (8-48)                     | 358 (147-707)                      | 18 (9-35)                              |                     |                         |                              |                                  |       |
| 2003 | Jharkhand        |                          |                              |                                   |                                       |                                 |                                     |                                          |                                              | 833 (300-1505)            | 22 (8-47)                     | 346 (143-700)                      | 18 (9-35)                              |                     |                         |                              |                                  |       |
| 2004 | Jharkhand        |                          |                              |                                   |                                       |                                 |                                     |                                          |                                              | 789 (286-1709)            | 20 (7-44)                     | 396 (125-1941)                     | 23 (8-50)                              |                     |                         |                              |                                  |       |
| 2005 | Jharkhand        |                          |                              |                                   |                                       |                                 |                                     |                                          |                                              | 721 (250-1456)            | 18 (7-40)                     | 318 (120-1768)                     | 21 (8-45)                              |                     |                         |                              |                                  |       |
| 2006 | Jharkhand        |                          |                              |                                   |                                       |                                 |                                     |                                          |                                              | 717 (266-1544)            | 18 (7-39)                     | 315 (102-1753)                     | 21 (8-44)                              |                     |                         |                              |                                  |       |
| 2007 | Jharkhand        |                          |                              |                                   |                                       |                                 |                                     |                                          |                                              | 670 (251-1436)            | 17 (8-36)                     | 291 (108-1631)                     | 19 (7-41)                              |                     |                         |                              |                                  |       |
| 2008 | Jharkhand        |                          |                              |                                   |                                       |                                 |                                     |                                          |                                              | 602 (225-1290)            | 15 (8-32)                     | 284 (106-1495)                     | 17 (8-30)                              |                     |                         |                              |                                  |       |
| 2009 | Jharkhand        |                          |                              |                                   |                                       |                                 |                                     |                                          |                                              | 536 (200-1148)            | 13 (6-28)                     | 268 (127-1302)                     | 16 (8-32)                              |                     |                         |                              |                                  |       |
| 2010 | Jharkhand        |                          |                              |                                   |                                       |                                 |                                     |                                          |                                              | 541 (200-1159)            | 13 (6-28)                     | 215 (120-1317)                     | 15 (8-33)                              |                     |                         |                              |                                  |       |
| 2011 | Jharkhand        |                          |                              |                                   |                                       |                                 |                                     |                                          |                                              | 517 (193-1107)            | 13 (6-27)                     | 207 (119-1257)                     | 14 (8-31)                              |                     |                         |                              |                                  |       |
| 2012 | Jharkhand        |                          |                              |                                   |                                       |                                 |                                     |                                          |                                              | 481 (181-1029)            | 12 (6-26)                     | 146 (80-1169)                      | 13 (8-29)                              |                     |                         |                              |                                  |       |
| 2013 | Jharkhand        |                          |                              |                                   |                                       |                                 |                                     |                                          |                                              | 438 (164-939)             | 11 (4-23)                     | 498 (186-1065)                     | 12 (8-26)                              |                     |                         |                              |                                  |       |
| 2014 | Jharkhand        |                          |                              |                                   |                                       |                                 |                                     |                                          |                                              | 384 (147-844)             | 10 (4-21)                     | 447 (167-958)                      | 11 (4-24)                              |                     |                         |                              |                                  |       |
| 2015 | Jharkhand        | 141363 (121971-168041)   | 1982 (1710-2356)             | 3474 (2997-4129)                  | 49 (42-58)                            | 58105 (43532-66274)             | 1428 (1070-1628)                    | 5 (2-11)                                 | 5 (2-11)                                     | 283 (132-500)             | 5 (3-10)                      | 398 (156-822)                      | 6 (2-13)                               |                     |                         |                              |                                  | 0.0-0 |
| 2000 | Karnataka        | 249063 (214897-290666)   | 4436 (3827-5272)             |                                   |                                       | 102412 (87277-116811)           | 1824 (1366-2080)                    |                                          |                                              | 1526 (656-3017)           | 27 (12-54)                    | 1732 (745-3465)                    | 31 (13-52)                             |                     |                         |                              |                                  |       |
| 2001 | Karnataka        |                          |                              |                                   |                                       |                                 |                                     |                                          |                                              | 1406 (606-2916)           | 26 (11-51)                    | 1653 (719-3387)                    | 29 (13-48)                             |                     |                         |                              |                                  |       |
| 2002 | Karnataka        |                          |                              |                                   |                                       |                                 |                                     |                                          |                                              | 1418 (610-2832)           | 25 (11-50)                    | 1611 (693-3168)                    | 28 (12-57)                             |                     |                         |                              |                                  |       |
| 2003 | Karnataka        |                          |                              |                                   |                                       |                                 |                                     |                                          |                                              | 1391 (597-2732)           | 24 (10-49)                    | 1579 (673-3148)                    | 25 (12-52)                             |                     |                         |                              |                                  |       |
| 2004 | Karnataka        |                          |                              |                                   |                                       |                                 |                                     |                                          |                                              | 1372 (586-2723)           | 24 (10-48)                    | 1558 (666-3093)                    | 27 (12-54)                             |                     |                         |                              |                                  |       |
| 2005 | Karnataka        |                          |                              |                                   |                                       |                                 |                                     |                                          |                                              | 1356 (602-2655)           | 24 (11-47)                    | 1540 (683-3016)                    | 27 (12-53)                             |                     |                         |                              |                                  |       |
| 2006 | Karnataka        |                          |                              |                                   |                                       |                                 |                                     |                                          |                                              | 1342 (610-2687)           | 23 (11-46)                    | 1525 (702-2995)                    | 27 (12-51)                             |                     |                         |                              |                                  |       |

| Year | State     | Spn pneumonia cases (UR) | Spn pneumonia cases: HV (UR) | Spn pneumonia incidence rate (UR) | Spn pneumonia incidence rate: HV (UR) | Spn severe pneumonia cases (UR) | Spn severe pneumonia cases: HV (UR) | Spn severe pneumonia incidence rate (UR) | Spn severe pneumonia incidence rate: HV (UR) | Spn meningitis cases (UR) | Spn meningitis cases: HV (UR) | Spn meningitis incidence rate (UR) | Spn meningitis incidence rate: HV (UR) | Spn NPfM cases (UR) | Spn NPfM cases: HV (UR) | Spn NPfM incidence rate (UR) | Spn NPfM incidence rate: HV (UR) |
|------|-----------|--------------------------|------------------------------|-----------------------------------|---------------------------------------|---------------------------------|-------------------------------------|------------------------------------------|----------------------------------------------|---------------------------|-------------------------------|------------------------------------|----------------------------------------|---------------------|-------------------------|------------------------------|----------------------------------|
| 2004 | Manipur   |                          |                              |                                   |                                       |                                 |                                     |                                          |                                              | 20 (5-52)                 |                               |                                    | 8 (2-21)                               | 23 (6-59)           |                         |                              | 8 (2-24)                         |
| 2005 | Manipur   |                          |                              |                                   |                                       |                                 |                                     |                                          |                                              | 19 (5-51)                 |                               |                                    | 8 (2-20)                               | 22 (5-57)           |                         |                              | 8 (2-23)                         |
| 2006 | Manipur   |                          |                              |                                   |                                       |                                 |                                     |                                          |                                              | 19 (4-50)                 |                               |                                    | 7 (2-19)                               | 21 (5-57)           |                         |                              | 8 (2-22)                         |
| 2007 | Manipur   |                          |                              |                                   |                                       |                                 |                                     |                                          |                                              | 19 (4-50)                 |                               |                                    | 7 (2-19)                               | 21 (5-57)           |                         |                              | 8 (2-21)                         |
| 2008 | Manipur   |                          |                              |                                   |                                       |                                 |                                     |                                          |                                              | 19 (4-50)                 |                               |                                    | 7 (2-19)                               | 22 (5-57)           |                         |                              | 8 (2-21)                         |
| 2009 | Manipur   |                          |                              |                                   |                                       |                                 |                                     |                                          |                                              | 20 (5-59)                 |                               |                                    | 7 (2-19)                               | 22 (5-59)           |                         |                              | 8 (2-21)                         |
| 2010 | Manipur   |                          |                              |                                   |                                       |                                 |                                     |                                          |                                              | 21 (5-54)                 |                               |                                    | 7 (2-19)                               | 23 (6-61)           |                         |                              | 8 (2-22)                         |
| 2011 | Manipur   |                          |                              |                                   |                                       |                                 |                                     |                                          |                                              | 21 (5-55)                 |                               |                                    | 8 (2-19)                               | 24 (7-63)           |                         |                              | 8 (2-22)                         |
| 2012 | Manipur   |                          |                              |                                   |                                       |                                 |                                     |                                          |                                              | 22 (6-56)                 |                               |                                    | 8 (2-24)                               | 25 (7-64)           |                         |                              | 9 (2-22)                         |
| 2013 | Manipur   |                          |                              |                                   |                                       |                                 |                                     |                                          |                                              | 22 (6-57)                 |                               |                                    | 8 (2-19)                               | 25 (7-65)           |                         |                              | 9 (2-22)                         |
| 2014 | Manipur   |                          |                              |                                   |                                       |                                 |                                     |                                          |                                              | 22 (6-56)                 |                               |                                    | 8 (2-19)                               | 25 (7-64)           |                         |                              | 9 (2-21)                         |
| 2015 | Manipur   | 3242 (2797-3854)         | 45 (39-54)                   | 1082 (933-1288)                   | 15 (13-18)                            | 1332 (998-1520)                 | 19 (14-21)                          | 445 (333-507)                            | 6 (5-7)                                      | 21 (6-54)                 | 0 (0-1)                       | 22 (7-18)                          | 0 (0-0)                                | 24 (7-61)           | 0 (0-1)                 | 24 (8-20)                    | 0 (0-0)                          |
| 2000 | Meghalaya | 14454 (12472-17182)      |                              | 4000 (3451-4755)                  |                                       | 5840 (4450-6775)                |                                     | 1644 (1232-1875)                         |                                              | 190 (74-277)              |                               | 41 (20-77)                         |                                        | 60 (26-111)         |                         |                              | 17 (8-31)                        |
| 2001 | Meghalaya |                          |                              |                                   |                                       |                                 |                                     |                                          |                                              | 156 (77-288)              |                               | 42 (21-78)                         |                                        | 62 (31-116)         |                         |                              | 17 (8-32)                        |
| 2002 | Meghalaya |                          |                              |                                   |                                       |                                 |                                     |                                          |                                              | 162 (80-300)              |                               | 43 (21-79)                         |                                        | 63 (32-121)         |                         |                              | 17 (8-32)                        |
| 2003 | Meghalaya |                          |                              |                                   |                                       |                                 |                                     |                                          |                                              | 169 (83-313)              |                               | 43 (21-80)                         |                                        | 63 (33-122)         |                         |                              | 17 (8-32)                        |
| 2004 | Meghalaya |                          |                              |                                   |                                       |                                 |                                     |                                          |                                              | 177 (87-328)              |                               | 44 (22-82)                         |                                        | 71 (35-131)         |                         |                              | 18 (9-33)                        |
| 2005 | Meghalaya |                          |                              |                                   |                                       |                                 |                                     |                                          |                                              | 185 (93-338)              |                               | 46 (23-83)                         |                                        | 74 (37-135)         |                         |                              | 18 (9-33)                        |
| 2006 | Meghalaya |                          |                              |                                   |                                       |                                 |                                     |                                          |                                              | 193 (99-349)              |                               | 46 (24-84)                         |                                        | 77 (40-140)         |                         |                              | 19 (10-34)                       |
| 2007 | Meghalaya |                          |                              |                                   |                                       |                                 |                                     |                                          |                                              | 198 (104-358)             |                               | 47 (24-84)                         |                                        | 78 (42-143)         |                         |                              | 19 (10-34)                       |
| 2008 | Meghalaya |                          |                              |                                   |                                       |                                 |                                     |                                          |                                              | 199 (105-360)             |                               | 46 (24-83)                         |                                        | 80 (42-144)         |                         |                              | 19 (10-33)                       |
| 2009 | Meghalaya |                          |                              |                                   |                                       |                                 |                                     |                                          |                                              | 192 (98-356)              |                               | 44 (22-81)                         |                                        | 77 (39-143)         |                         |                              | 18 (9-33)                        |
| 2010 | Meghalaya |                          |                              |                                   |                                       |                                 |                                     |                                          |                                              | 188 (90-351)              |                               | 42 (20-81)                         |                                        | 75 (38-143)         |                         |                              | 17 (8-32)                        |
| 2011 | Meghalaya |                          |                              |                                   |                                       |                                 |                                     |                                          |                                              | 185 (84-352)              |                               | 41 (19-80)                         |                                        | 74 (34-145)         |                         |                              | 16 (7-32)                        |
| 2012 | Meghalaya |                          |                              |                                   |                                       |                                 |                                     |                                          |                                              | 182 (79-352)              |                               | 40 (17-79)                         |                                        | 73 (32-145)         |                         |                              | 16 (7-32)                        |
| 2013 | Meghalaya |                          |                              |                                   |                                       |                                 |                                     |                                          |                                              | 184 (81-370)              |                               | 40 (17-80)                         |                                        | 74 (32-145)         |                         |                              | 16 (7-32)                        |
| 2014 | Meghalaya |                          |                              |                                   |                                       |                                 |                                     |                                          |                                              | 188 (82-376)              |                               | 40 (18-81)                         |                                        | 75 (33-152)         |                         |                              | 16 (7-32)                        |
| 2015 | Meghalaya | 11151 (8622-13296)       | 156 (135-186)                | 2351 (2028-2795)                  | 33 (28-39)                            | 4585 (3435-5230)                | 64 (48-73)                          | 987 (724-1103)                           | 14 (10-15)                                   | 193 (93-360)              | 3 (1-6)                       | 41 (18-85)                         | 1 (0-1)                                | 78 (35-155)         | 1 (1-2)                 | 24 (8-32)                    | 0 (0-0)                          |
| 2000 | Mizoram   | 3966 (3422-4714)         |                              | 3519 (3027-4184)                  |                                       | 4585 (3435-5230)                |                                     | 1446 (1083-1649)                         |                                              | 34 (14-71)                |                               | 30 (12-63)                         |                                        | 14 (5-28)           |                         |                              | 12 (5-25)                        |
| 2001 | Mizoram   |                          |                              |                                   |                                       |                                 |                                     |                                          |                                              | 33 (13-66)                |                               | 28 (11-56)                         |                                        | 13 (5-26)           |                         |                              | 11 (5-24)                        |
| 2002 | Mizoram   |                          |                              |                                   |                                       |                                 |                                     |                                          |                                              | 32 (13-67)                |                               | 27 (11-57)                         |                                        | 13 (5-27)           |                         |                              | 11 (5-23)                        |
| 2003 | Mizoram   |                          |                              |                                   |                                       |                                 |                                     |                                          |                                              | 32 (13-67)                |                               | 26 (11-57)                         |                                        | 13 (5-27)           |                         |                              | 11 (5-23)                        |
| 2004 | Mizoram   |                          |                              |                                   |                                       |                                 |                                     |                                          |                                              | 31 (13-66)                |                               | 26 (10-54)                         |                                        | 13 (5-26)           |                         |                              | 10 (4-22)                        |
| 2005 | Mizoram   |                          |                              |                                   |                                       |                                 |                                     |                                          |                                              | 31 (13-65)                |                               | 25 (10-53)                         |                                        | 13 (5-26)           |                         |                              | 10 (4-21)                        |
| 2006 | Mizoram   |                          |                              |                                   |                                       |                                 |                                     |                                          |                                              | 31 (13-65)                |                               | 25 (10-53)                         |                                        | 13 (5-26)           |                         |                              | 10 (4-21)                        |
| 2007 | Mizoram   |                          |                              |                                   |                                       |                                 |                                     |                                          |                                              | 32 (13-66)                |                               | 25 (10-51)                         |                                        | 13 (5-26)           |                         |                              | 10 (4-20)                        |
| 2008 | Mizoram   |                          |                              |                                   |                                       |                                 |                                     |                                          |                                              | 32 (13-66)                |                               | 24 (10-50)                         |                                        | 13 (5-26)           |                         |                              | 10 (4-20)                        |
| 2009 | Mizoram   |                          |                              |                                   |                                       |                                 |                                     |                                          |                                              | 32 (14-66)                |                               | 24 (10-50)                         |                                        | 13 (5-26)           |                         |                              | 10 (4-20)                        |
| 2010 | Mizoram   |                          |                              |                                   |                                       |                                 |                                     |                                          |                                              | 33 (14-65)                |                               | 24 (10-50)                         |                                        | 13 (5-26)           |                         |                              | 10 (4-20)                        |
| 2011 | Mizoram   |                          |                              |                                   |                                       |                                 |                                     |                                          |                                              | 33 (14-66)                |                               | 24 (11-49)                         |                                        | 13 (5-26)           |                         |                              | 10 (4-20)                        |
| 2012 | Mizoram   |                          |                              |                                   |                                       |                                 |                                     |                                          |                                              | 33 (15-66)                |                               | 24 (11-49)                         |                                        | 13 (5-27)           |                         |                              | 10 (4-20)                        |
| 2013 | Mizoram   |                          |                              |                                   |                                       |                                 |                                     |                                          |                                              | 33 (15-67)                |                               | 24 (11-48)                         |                                        | 13 (5-27)           |                         |                              | 10 (4-19)                        |
| 2014 | Mizoram   |                          |                              |                                   |                                       |                                 |                                     |                                          |                                              | 33 (15-67)                |                               | 24 (11-48)                         |                                        | 13 (5-27)           |                         |                              | 10 (4-19)                        |
| 2015 | Mizoram   | 1240 (1070-1474)         | 17 (15-21)                   | 890 (758-1058)                    | 12 (11-15)                            | 509 (382-581)                   | 7 (6-8)                             | 366 (274-417)                            | 5 (4-6)                                      | 33 (15-67)                | 0 (0-1)                       | 24 (10-50)                         | 0 (0-1)                                | 27 (11-56)          | 1 (0-1)                 | 27 (11-56)                   | 0 (0-1)                          |
| 2000 | Nagaland  | 8088 (6978-9164)         |                              | 3804 (3282-4522)                  |                                       | 3323 (2490-3791)                |                                     | 1563 (1171-1783)                         |                                              | 23 (8-50)                 |                               | 11 (4-24)                          |                                        | 26 (9-57)           |                         |                              | 12 (4-27)                        |
| 2001 | Nagaland  |                          |                              |                                   |                                       |                                 |                                     |                                          |                                              | 21 (8-48)                 |                               | 11 (4-25)                          |                                        | 27 (9-60)           |                         |                              | 12 (4-28)                        |
| 2002 | Nagaland  |                          |                              |                                   |                                       |                                 |                                     |                                          |                                              | 20 (8-47)                 |                               | 12 (4-26)                          |                                        | 29 (10-65)          |                         |                              | 13 (5-30)                        |
| 2003 | Nagaland  |                          |                              |                                   |                                       |                                 |                                     |                                          |                                              | 27 (9-60)                 |                               | 13 (4-28)                          |                                        | 31 (11-69)          |                         |                              | 14 (5-31)                        |
| 2004 | Nagaland  |                          |                              |                                   |                                       |                                 |                                     |                                          |                                              | 29 (10-63)                |                               | 13 (4-29)                          |                                        | 32 (11-72)          |                         |                              | 15 (5-33)                        |
| 2005 | Nagaland  |                          |                              |                                   |                                       |                                 |                                     |                                          |                                              | 29 (10-65)                |                               | 13 (4-29)                          |                                        | 33 (11-73)          |                         |                              | 15 (5-33)                        |
| 2006 | Nagaland  |                          |                              |                                   |                                       |                                 |                                     |                                          |                                              | 29 (9-65)                 |                               | 13 (4-29)                          |                                        | 33 (11-74)          |                         |                              | 15 (5-33)                        |
| 2007 | Nagaland  |                          |                              |                                   |                                       |                                 |                                     |                                          |                                              | 28 (9-64)                 |                               | 13 (4-29)                          |                                        | 32 (10-73)          |                         |                              | 14 (5-33)                        |
| 2008 | Nagaland  |                          |                              |                                   |                                       |                                 |                                     |                                          |                                              | 28 (9-64)                 |                               | 13 (4-29)                          |                                        | 32 (10-73)          |                         |                              | 14 (5-33)                        |
| 2009 | Nagaland  |                          |                              |                                   |                                       |                                 |                                     |                                          |                                              | 26 (8-61)                 |                               | 12 (4-27)                          |                                        | 30 (9-69)           |                         |                              | 13 (4-31)                        |
| 2010 | Nagaland  |                          |                              |                                   |                                       |                                 |                                     |                                          |                                              | 26 (8-62)                 |                               | 12 (4-28)                          |                                        | 30 (9-70)           |                         |                              | 14 (4-32)                        |
| 2011 | Nagaland  |                          |                              |                                   |                                       |                                 |                                     |                                          |                                              | 26 (7-60)                 |                               | 12 (4-27)                          |                                        | 29 (8-69)           |                         |                              | 13 (4-31)                        |
| 2012 | Nagaland  |                          |                              |                                   |                                       |                                 |                                     |                                          |                                              | 24 (7-58)                 |                               | 11 (3-27)                          |                                        | 28 (8-66)           |                         |                              | 13 (4-30)                        |
| 2013 | Nagaland  |                          |                              |                                   |                                       |                                 |                                     |                                          |                                              | 23 (7-56)                 |                               | 11 (3-26)                          |                                        | 27 (8-64)           |                         |                              | 13 (4-30)                        |
| 2014 | Nagaland  |                          |                              |                                   |                                       |                                 |                                     |                                          |                                              | 22 (8-53)                 |                               | 10 (3-24)                          |                                        | 25 (7-60)           |                         |                              | 12 (3-28)                        |
| 2015 | Nagaland  | 4200 (3687-5052)         | 60 (51-71)                   | 1778 (1707-2351)                  | 28 (24-34)                            | 1747 (1308-1993)                | 25 (18-28)                          | 813 (608-928)                            | 11 (8-13)                                    | 22 (8-53)                 | 0 (0-1)                       | 10 (3-24)                          | 0 (0-0)                                | 25 (7-60)           | 0 (0-1)                 | 25 (7-60)                    | 0 (0-0)                          |
| 2000 | Odisha    | 19360 (167042-23196)     |                              | 4758 (4174-5688)                  |                                       | 7955 (5962-9074)                |                                     | 1960 (1468-2235)                         |                                              | 1937 (878-319)            |                               | 48 (22-84)                         |                                        | 177 (53-152)        |                         |                              | 18 (8-38)                        |
| 2001 | Odisha    |                          |                              |                                   |                                       |                                 |                                     |                                          |                                              | 1930 (81-3608)            |                               | 45 (20-85)                         |                                        | 174 (53-1447)       |                         |                              | 18 (8-35)                        |
| 2002 | Odisha    |                          |                              |                                   |                                       |                                 |                                     |                                          |                                              | 1723 (78-1938)            |                               | 42 (19-83)                         |                                        | 159 (49-1863)       |                         |                              | 15 (7-29)                        |
| 2003 | Odisha    |                          |                              |                                   |                                       |                                 |                                     |                                          |                                              | 1622 (77-3200)            |                               | 39 (18-78)                         |                                        | 161 (295-1284)      |                         |                              | 16 (7-31)                        |
| 2004 | Odisha    |                          |                              |                                   |                                       |                                 |                                     |                                          |                                              | 1520 (80-3003)            |                               | 37 (17-75)                         |                                        | 150 (277-1205)      |                         |                              | 15 (7-29)                        |
| 2005 | Odisha    |                          |                              |                                   |                                       |                                 |                                     |                                          |                                              | 1423 (84-2819)            |                               | 34 (16-68)                         |                                        | 171 (258-1311)      |                         |                              | 14 (6-27)                        |
| 2006 | Odisha    |                          |                              |                                   |                                       |                                 |                                     |                                          |                                              | 1320 (89-2942)            |                               | 33 (14-64)                         |                                        | 153 (239-1068)      |                         |                              | 13 (6-26)                        |
| 2007 | Odisha    |                          |                              |                                   |                                       |                                 |                                     |                                          |                                              | 1230 (54-2453)            |                               | 30 (13-59)                         |                                        | 144 (220-984)       |                         |                              | 12 (5-24)                        |
| 2008 | Odisha    |                          |                              |                                   |                                       |                                 |                                     |                                          |                                              | 1146 (51-2289)            |                               | 28 (12-65)                         |                                        | 149 (205-918)       |                         |                              | 11 (5-22)                        |
| 2009 | Odisha    |                          |                              |                                   |                                       |                                 |                                     |                                          |                                              | 1066 (45-2133)            |                               | 26 (11-62)                         |                                        | 147 (191-865)       |                         |                              | 11 (5-22)                        |
| 2010 | Odisha    |                          |                              |                                   |                                       |                                 |                                     |                                          |                                              | 995 (446-1959)            |                               | 24 (11-49)                         |                                        | 139 (179-802)       |                         |                              | 10 (4-20)                        |
| 2011 | Odisha    |                          |                              |                                   |                                       |                                 |                                     |                                          |                                              | 906 (388-1845)            |                               | 23 (10-54)                         |                                        | 126 (164-844)       |                         |                              | 9 (4-19)                         |
| 2012 | Odisha    |                          |                              |                                   |                                       |                                 |                                     |                                          |                                              | 873 (344-1815)            |                               | 22 (8-45)                          |                                        | 99 (130-2061)       |                         |                              | 9 (5-19)                         |
| 2013 | Odisha    |                          |                              |                                   |                                       |                                 |                                     |                                          |                                              | 810 (325-1698)            |                               | 20 (8-42)                          |                                        | 92 (265-1688)       |                         |                              | 8 (4-18)                         |
| 2014 | Odisha    |                          |                              |                                   |                                       |                                 |                                     |                                          |                                              | 748 (296-1559)            |                               | 19 (7-39)                          |                                        | 84 (336-1771)       |                         |                              | 8 (4-15)                         |
| 2015 | Odisha    | 112987 (98694-133217)    | 1571 (1356-1868)             | 2846 (2457-3386)                  | 40 (34-47)                            | 46074 (34518-52552)             | 646 (484-737)                       | 1371 (877-1336)                          | 16 (12-19)                                   | 664 (270-1426)            | 10 (4-21)                     | 17 (7-36)                          | 0 (0-1)                                | 178 (207-620)       | 12 (8-24)               | 20 (8-41)                    | 0 (0-1)                          |
| 2000 | Punjab    | 106782 (92116-129816)    |                              | 4406 (3807-5237)                  |                                       | 43071 (32973-50047)             |                                     | 1871 (1330-2066)                         |                                              | 958 (508-1651)            |                               | 42 (20-77)                         |                                        | 108 (42-247)        |                         |                              | 17 (8-34)                        |
| 2001 | Punjab    |                          |                              |                                   |                                       |                                 |                                     |                                          |                                              | 894 (469-1580)            |                               | 37 (18-65)                         |                                        | 1016 (533-1794)     |                         |                              | 12 (4-27)                        |
| 2002 | Punjab    |                          |                              |                                   |                                       |                                 |                                     |                                          |                                              | 836 (438-1674)            |                               | 34 (16-60)                         |                                        | 949 (497-1674)      |                         |                              | 13 (5-29)                        |
| 2003 | Punjab    |                          |                              |                                   |                                       |                                 |                                     |                                          |                                              |                           |                               |                                    |                                        |                     |                         |                              |                                  |

| Year | State           | Spi pneumonia cases (UR) | Spi pneumonia cases: HIV (UR) | Spi pneumonia incidence rate (UR) | Spi pneumonia incidence rate: HIV (UR) | Spi severe pneumonia cases (UR) | Spi severe pneumonia cases: HIV (UR) | Spi severe pneumonia incidence rate (UR) | Spi severe pneumonia incidence rate: HIV (UR) | Spi meningitis cases (UR) | Spi meningitis cases: HIV (UR) | Spi meningitis incidence rate (UR) | Spi meningitis incidence rate: HIV (UR) | Spi NPM cases (UR) | Spi NPM cases: HIV (UR) | Spi NPM incidence rate (UR) | Spi NPM incidence rate: HIV (UR) |
|------|-----------------|--------------------------|-------------------------------|-----------------------------------|----------------------------------------|---------------------------------|--------------------------------------|------------------------------------------|-----------------------------------------------|---------------------------|--------------------------------|------------------------------------|-----------------------------------------|--------------------|-------------------------|-----------------------------|----------------------------------|
| 2007 | Tamil Nadu      |                          |                               |                                   |                                        |                                 |                                      |                                          |                                               | 800 (485-1470)            |                                | 13 (7-25)                          |                                         | 509 (461-1670)     |                         | 15 (8-28)                   |                                  |
| 2008 | Tamil Nadu      |                          |                               |                                   |                                        |                                 |                                      |                                          |                                               | 753 (281-1381)            |                                | 13 (6-23)                          |                                         | 656 (433-1068)     |                         | 14 (7-26)                   |                                  |
| 2009 | Tamil Nadu      |                          |                               |                                   |                                        |                                 |                                      |                                          |                                               | 706 (347-1302)            |                                | 12 (6-22)                          |                                         | 602 (284-1479)     |                         | 14 (7-25)                   |                                  |
| 2010 | Tamil Nadu      |                          |                               |                                   |                                        |                                 |                                      |                                          |                                               | 665 (318-1246)            |                                | 11 (5-21)                          |                                         | 555 (318-1024)     |                         | 13 (6-24)                   |                                  |
| 2011 | Tamil Nadu      |                          |                               |                                   |                                        |                                 |                                      |                                          |                                               | 636 (246-1435)            |                                | 11 (4-24)                          |                                         | 723 (280-1630)     |                         | 12 (5-28)                   |                                  |
| 2012 | Tamil Nadu      |                          |                               |                                   |                                        |                                 |                                      |                                          |                                               | 598 (221-1343)            |                                | 10 (4-23)                          |                                         | 676 (251-1537)     |                         | 10 (4-26)                   |                                  |
| 2013 | Tamil Nadu      |                          |                               |                                   |                                        |                                 |                                      |                                          |                                               | 560 (208-1274)            |                                | 10 (4-22)                          |                                         | 636 (236-1447)     |                         | 11 (4-25)                   |                                  |
| 2014 | Tamil Nadu      |                          |                               |                                   |                                        |                                 |                                      |                                          |                                               | 522 (194-1178)            |                                | 9 (3-21)                           |                                         | 593 (220-1380)     |                         | 10 (4-24)                   |                                  |
| 2015 | Tamil Nadu      | 75992 (65567-90333)      | 1066 (918-1267)               | 1330 (1147-1511)                  | 19 (16-22)                             | 31228 (23394-39616)             | 438 (328-499)                        | 546 (409-623)                            | 8 (6-9)                                       | 456 (154-1129)            | 7 (3-17)                       | 6 (3-20)                           | 0 (0-0)                                 | 453 (209-1282)     | 8 (3-19)                | 10 (4-22)                   | 0 (0-0)                          |
| 2000 | Tripura         | 15138 (13061-17995)      |                               | 4557 (3932-5417)                  |                                        | 6217 (4658-7991)                |                                      | 1871 (1402-2134)                         |                                               | 51 (20-107)               |                                | 16 (8-32)                          |                                         | 58 (22-127)        |                         | 17 (7-38)                   |                                  |
| 2001 | Tripura         |                          |                               |                                   |                                        |                                 |                                      |                                          |                                               | 46 (19-88)                |                                | 14 (6-28)                          |                                         | 42 (20-109)        |                         | 16 (8-32)                   |                                  |
| 2002 | Tripura         |                          |                               |                                   |                                        |                                 |                                      |                                          |                                               | 42 (18-88)                |                                | 12 (5-26)                          |                                         | 47 (18-100)        |                         | 14 (5-29)                   |                                  |
| 2003 | Tripura         |                          |                               |                                   |                                        |                                 |                                      |                                          |                                               | 38 (15-80)                |                                | 11 (4-23)                          |                                         | 43 (17-91)         |                         | 13 (5-29)                   |                                  |
| 2004 | Tripura         |                          |                               |                                   |                                        |                                 |                                      |                                          |                                               | 35 (14-74)                |                                | 10 (4-20)                          |                                         | 40 (16-84)         |                         | 12 (5-24)                   |                                  |
| 2005 | Tripura         |                          |                               |                                   |                                        |                                 |                                      |                                          |                                               | 34 (13-69)                |                                | 10 (4-20)                          |                                         | 38 (15-79)         |                         | 11 (4-23)                   |                                  |
| 2006 | Tripura         |                          |                               |                                   |                                        |                                 |                                      |                                          |                                               | 32 (13-65)                |                                | 9 (4-19)                           |                                         | 36 (15-74)         |                         | 10 (4-21)                   |                                  |
| 2007 | Tripura         |                          |                               |                                   |                                        |                                 |                                      |                                          |                                               | 31 (14-63)                |                                | 9 (4-19)                           |                                         | 36 (15-72)         |                         | 10 (4-20)                   |                                  |
| 2008 | Tripura         |                          |                               |                                   |                                        |                                 |                                      |                                          |                                               | 31 (13-61)                |                                | 9 (4-17)                           |                                         | 35 (15-69)         |                         | 10 (4-19)                   |                                  |
| 2009 | Tripura         |                          |                               |                                   |                                        |                                 |                                      |                                          |                                               | 30 (14-59)                |                                | 8 (4-16)                           |                                         | 35 (16-72)         |                         | 10 (4-19)                   |                                  |
| 2010 | Tripura         |                          |                               |                                   |                                        |                                 |                                      |                                          |                                               | 31 (15-57)                |                                | 9 (4-18)                           |                                         | 31 (15-65)         |                         | 10 (4-18)                   |                                  |
| 2011 | Tripura         |                          |                               |                                   |                                        |                                 |                                      |                                          |                                               | 31 (15-57)                |                                | 9 (4-16)                           |                                         | 36 (16-65)         |                         | 10 (5-18)                   |                                  |
| 2012 | Tripura         |                          |                               |                                   |                                        |                                 |                                      |                                          |                                               | 31 (17-56)                |                                | 9 (5-15)                           |                                         | 36 (16-63)         |                         | 10 (5-18)                   |                                  |
| 2013 | Tripura         |                          |                               |                                   |                                        |                                 |                                      |                                          |                                               | 31 (16-54)                |                                | 9 (5-15)                           |                                         | 35 (16-61)         |                         | 10 (5-17)                   |                                  |
| 2014 | Tripura         |                          |                               |                                   |                                        |                                 |                                      |                                          |                                               | 30 (15-61)                |                                | 8 (4-17)                           |                                         | 34 (17-70)         |                         | 10 (5-20)                   |                                  |
| 2015 | Tripura         | 7816 (6795-9362)         | 110 (85-131)                  | 2205 (1903-2621)                  | 31 (27-37)                             | 3240 (2427-3695)                | 45 (24-52)                           | 807 (629-1034)                           | 13 (10-15)                                    | 28 (12-55)                | 0 (0-1)                        | 0 (0-1)                            | 0 (0-0)                                 | 27 (12-54)         | 0 (0-1)                 | 10 (5-20)                   | 0 (0-0)                          |
| 2000 | Union Territory |                          |                               |                                   |                                        |                                 |                                      |                                          |                                               | 54 (26-103)               |                                | 20 (9-37)                          |                                         | 62 (30-117)        |                         | 22 (11-42)                  |                                  |
| 2001 | Union Territory |                          |                               |                                   |                                        |                                 |                                      |                                          |                                               | 52 (25-99)                |                                | 19 (9-35)                          |                                         | 60 (28-112)        |                         | 21 (10-40)                  |                                  |
| 2002 | Union Territory |                          |                               |                                   |                                        |                                 |                                      |                                          |                                               | 51 (25-96)                |                                | 18 (9-34)                          |                                         | 58 (28-109)        |                         | 20 (10-38)                  |                                  |
| 2003 | Union Territory |                          |                               |                                   |                                        |                                 |                                      |                                          |                                               | 50 (23-99)                |                                | 18 (9-35)                          |                                         | 57 (26-113)        |                         | 20 (9-39)                   |                                  |
| 2004 | Union Territory |                          |                               |                                   |                                        |                                 |                                      |                                          |                                               | 50 (23-99)                |                                | 17 (8-34)                          |                                         | 57 (26-113)        |                         | 20 (9-39)                   |                                  |
| 2005 | Union Territory |                          |                               |                                   |                                        |                                 |                                      |                                          |                                               | 51 (24-99)                |                                | 18 (9-34)                          |                                         | 58 (28-113)        |                         | 20 (10-39)                  |                                  |
| 2006 | Union Territory |                          |                               |                                   |                                        |                                 |                                      |                                          |                                               | 54 (26-102)               |                                | 18 (9-35)                          |                                         | 61 (32-114)        |                         | 21 (11-39)                  |                                  |
| 2007 | Union Territory |                          |                               |                                   |                                        |                                 |                                      |                                          |                                               | 58 (34-102)               |                                | 20 (12-35)                         |                                         | 66 (38-116)        |                         | 22 (13-39)                  |                                  |
| 2008 | Union Territory |                          |                               |                                   |                                        |                                 |                                      |                                          |                                               | 62 (36-104)               |                                | 21 (12-36)                         |                                         | 70 (40-118)        |                         | 24 (14-40)                  |                                  |
| 2009 | Union Territory |                          |                               |                                   |                                        |                                 |                                      |                                          |                                               | 63 (35-102)               |                                | 21 (10-39)                         |                                         | 72 (40-116)        |                         | 24 (13-38)                  |                                  |
| 2010 | Union Territory |                          |                               |                                   |                                        |                                 |                                      |                                          |                                               | 62 (34-99)                |                                | 21 (11-34)                         |                                         | 71 (38-113)        |                         | 24 (13-38)                  |                                  |
| 2011 | Union Territory |                          |                               |                                   |                                        |                                 |                                      |                                          |                                               | 60 (33-98)                |                                | 20 (11-33)                         |                                         | 68 (36-111)        |                         | 23 (13-38)                  |                                  |
| 2012 | Union Territory |                          |                               |                                   |                                        |                                 |                                      |                                          |                                               | 57 (31-94)                |                                | 19 (11-32)                         |                                         | 65 (35-107)        |                         | 22 (12-36)                  |                                  |
| 2013 | Union Territory |                          |                               |                                   |                                        |                                 |                                      |                                          |                                               | 54 (29-89)                |                                | 18 (10-30)                         |                                         | 61 (33-101)        |                         | 21 (11-34)                  |                                  |
| 2014 | Union Territory |                          |                               |                                   |                                        |                                 |                                      |                                          |                                               | 49 (28-81)                |                                | 17 (9-28)                          |                                         | 55 (30-92)         |                         | 19 (10-31)                  |                                  |
| 2015 | Union Territory | 8637 (4864-1701)         | 79 (68-94)                    | 1925 (1661-2288)                  | 27 (23-32)                             | 2316 (1735-2842)                | 32 (24-37)                           | 791 (593-992)                            | 11 (8-13)                                     | 43 (23-73)                | 1 (0-1)                        | 18 (8-25)                          | 0 (0-0)                                 | 49 (26-83)         | 1 (0-1)                 | 17 (7-28)                   | 0 (0-0)                          |
| 2000 | Uttar Pradesh   | 1397037 (120304-1698984) |                               | 5911 (5101-7027)                  |                                        | 574511 (430426-690288)          |                                      | 2431 (1921-2773)                         |                                               | 14874 (7467-27234)        |                                | 63 (32-119)                        |                                         | 5966 (2905-10923)  |                         | 20 (13-44)                  |                                  |
| 2001 | Uttar Pradesh   |                          |                               |                                   |                                        |                                 |                                      |                                          |                                               | 14271 (7164-26129)        |                                | 60 (30-110)                        |                                         | 5724 (2874-10480)  |                         | 24 (12-44)                  |                                  |
| 2002 | Uttar Pradesh   |                          |                               |                                   |                                        |                                 |                                      |                                          |                                               | 13638 (6846-24678)        |                                | 57 (29-105)                        |                                         | 6470 (2747-10198)  |                         | 23 (12-42)                  |                                  |
| 2003 | Uttar Pradesh   |                          |                               |                                   |                                        |                                 |                                      |                                          |                                               | 12977 (6522-23785)        |                                | 58 (28-100)                        |                                         | 5295 (2618-9540)   |                         | 22 (11-40)                  |                                  |
| 2004 | Uttar Pradesh   |                          |                               |                                   |                                        |                                 |                                      |                                          |                                               | 12257 (6175-22501)        |                                | 52 (26-86)                         |                                         | 4915 (2475-9025)   |                         | 21 (10-38)                  |                                  |
| 2005 | Uttar Pradesh   |                          |                               |                                   |                                        |                                 |                                      |                                          |                                               | 11480 (5718-21183)        |                                | 49 (24-80)                         |                                         | 4605 (2294-8497)   |                         | 20 (10-36)                  |                                  |
| 2006 | Uttar Pradesh   |                          |                               |                                   |                                        |                                 |                                      |                                          |                                               | 10717 (5284-19879)        |                                | 46 (22-86)                         |                                         | 4299 (2118-7974)   |                         | 18 (9-34)                   |                                  |
| 2007 | Uttar Pradesh   |                          |                               |                                   |                                        |                                 |                                      |                                          |                                               | 9959 (4860-18065)         |                                | 43 (21-79)                         |                                         | 3995 (1949-7446)   |                         | 17 (8-32)                   |                                  |
| 2008 | Uttar Pradesh   |                          |                               |                                   |                                        |                                 |                                      |                                          |                                               | 9306 (4503-17390)         |                                | 40 (20-75)                         |                                         | 3732 (1826-6975)   |                         | 16 (8-30)                   |                                  |
| 2009 | Uttar Pradesh   |                          |                               |                                   |                                        |                                 |                                      |                                          |                                               | 8737 (4286-16073)         |                                | 38 (19-71)                         |                                         | 3504 (1719-6967)   |                         | 15 (7-28)                   |                                  |
| 2010 | Uttar Pradesh   |                          |                               |                                   |                                        |                                 |                                      |                                          |                                               | 8233 (4054-15483)         |                                | 36 (18-68)                         |                                         | 3302 (1626-6210)   |                         | 14 (7-27)                   |                                  |
| 2011 | Uttar Pradesh   |                          |                               |                                   |                                        |                                 |                                      |                                          |                                               | 7786 (3471-15133)         |                                | 34 (16-67)                         |                                         | 3054 (1542-5716)   |                         | 13 (7-16)                   |                                  |
| 2012 | Uttar Pradesh   |                          |                               |                                   |                                        |                                 |                                      |                                          |                                               | 7245 (3237-14095)         |                                | 32 (14-63)                         |                                         | 2829 (1376-4609)   |                         | 12 (6-15)                   |                                  |
| 2013 | Uttar Pradesh   |                          |                               |                                   |                                        |                                 |                                      |                                          |                                               | 6759 (3027-13180)         |                                | 31 (14-60)                         |                                         | 2677 (1248-4870)   |                         | 11 (6-14)                   |                                  |
| 2014 | Uttar Pradesh   |                          |                               |                                   |                                        |                                 |                                      |                                          |                                               | 6233 (2795-12171)         |                                | 29 (13-56)                         |                                         | 2070 (1075-3824)   |                         | 10 (6-13)                   |                                  |
| 2015 | Uttar Pradesh   | 868357 (749238-1032232)  | 12176 (10506-14474)           | 4018 (3467-4777)                  | 56 (49-67)                             | 356899 (267387-407077)          | 5004 (3749-6708)                     | 1652 (1237-1884)                         | 23 (17-26)                                    | 5783 (2985-11233)         | 86 (38-168)                    | 27 (12-52)                         | 0 (0-1)                                 | 6534 (2935-12759)  | 97 (44-190)             | 30 (14-59)                  | 0 (0-1)                          |
| 2000 | Uttarakhand     |                          |                               |                                   |                                        |                                 |                                      |                                          |                                               | 332 (157-612)             |                                | 32 (16-58)                         |                                         | 133 (67-245)       |                         | 13 (6-23)                   |                                  |
| 2001 | Uttarakhand     |                          |                               |                                   |                                        |                                 |                                      |                                          |                                               | 322 (162-594)             |                                | 31 (15-56)                         |                                         | 129 (65-238)       |                         | 12 (6-23)                   |                                  |
| 2002 | Uttarakhand     |                          |                               |                                   |                                        |                                 |                                      |                                          |                                               | 311 (157-570)             |                                | 29 (15-54)                         |                                         | 125 (63-221)       |                         | 12 (6-22)                   |                                  |
| 2003 | Uttarakhand     |                          |                               |                                   |                                        |                                 |                                      |                                          |                                               | 298 (137-571)             |                                | 28 (13-54)                         |                                         | 139 (65-244)       |                         | 12 (6-21)                   |                                  |
| 2004 | Uttarakhand     |                          |                               |                                   |                                        |                                 |                                      |                                          |                                               | 281 (130-542)             |                                | 27 (12-51)                         |                                         | 119 (64-215)       |                         | 10 (4-18)                   |                                  |
| 2005 | Uttarakhand     |                          |                               |                                   |                                        |                                 |                                      |                                          |                                               | 258 (114-508)             |                                | 24 (11-48)                         |                                         | 293 (130-575)      |                         | 10 (4-15)                   |                                  |
| 2006 | Uttarakhand     |                          |                               |                                   |                                        |                                 |                                      |                                          |                                               | 235 (99-472)              |                                | 22 (9-45)                          |                                         | 266 (113-536)      |                         | 20 (11-51)                  |                                  |
| 2007 | Uttarakhand     |                          |                               |                                   |                                        |                                 |                                      |                                          |                                               | 212 (94-434)              |                                | 20 (9-41)                          |                                         | 241 (97-493)       |                         | 20 (9-47)                   |                                  |
| 2008 | Uttarakhand     |                          |                               |                                   |                                        |                                 |                                      |                                          |                                               | 194 (79-398)              |                                | 18 (7-38)                          |                                         | 220 (89-452)       |                         | 21 (8-43)                   |                                  |
| 2009 | Uttarakhand     |                          |                               |                                   |                                        |                                 |                                      |                                          |                                               | 178 (72-367)              |                                | 17 (7-35)                          |                                         | 202 (82-416)       |                         | 19 (8-40)                   |                                  |
| 2010 | Uttarakhand     |                          |                               |                                   |                                        |                                 |                                      |                                          |                                               | 164 (66-337)              |                                | 16 (7-32)                          |                                         | 186 (75-382)       |                         | 18 (7-37)                   |                                  |
| 2011 | Uttarakhand     |                          |                               |                                   |                                        |                                 |                                      |                                          |                                               | 149 (60-307)              |                                | 14 (6-30)                          |                                         | 169 (69-348)       |                         | 16 (7-34)                   |                                  |
| 2012 | Uttarakhand     |                          |                               |                                   |                                        |                                 |                                      |                                          |                                               | 132 (54-272)              |                                | 13 (6-27)                          |                                         | 150 (61-309)       |                         | 15 (6-30)                   |                                  |
| 2013 | Uttarakhand     |                          |                               |                                   |                                        |                                 |                                      |                                          |                                               | 118 (48-242)              |                                | 12 (5-24)                          |                                         | 133 (54-275)       |                         | 13 (5-27)                   |                                  |
| 2014 | Uttarakhand     |                          |                               |                                   |                                        |                                 |                                      |                                          |                                               | 103 (42-213)              |                                | 10 (4-21)                          |                                         | 118 (48-242)       |                         | 12 (5-24)                   |                                  |
| 2015 | Uttarakhand     | 24309 (20975-28897)      | 341 (294-405)                 | 2459 (2122-2923)                  | 34 (30-41)                             | 10000 (7489-11406)              | 140 (105-160)                        | 1011 (758-1154)                          | 14 (11-16)                                    | 92 (37-189)               | 1 (1-3)                        | 9 (4-19)                           | 0 (0-0)                                 | 104 (42-214)       | 2 (1-3)                 | 14 (6-22)                   | 0 (0-0)                          |
| 2000 | West Bengal     | 429118 (370253-510101)   |                               | 4930 (4254-5660)                  |                                        | 176361 (132128-201196)          |                                      | 2026 (1518-2311)                         |                                               | 2818 (1335-5139)          |                                | 32 (16-61)                         |                                         | 3188 (1618-6411)   |                         | 31 (17-60)                  |                                  |
| 2001 | West Bengal     |                          |                               |                                   |                                        |                                 |                                      |                                          |                                               | 2568 (1217-4851)          |                                | 29 (14-56)                         |                                         | 2916 (1383-6510)   |                         | 33 (16-63)                  |                                  |
| 2002 | West Bengal     |                          |                               |                                   |                                        |                                 |                                      |                                          |                                               | 2306 (1088-4362)          |                                | 27 (13-50)                         |                                         | 2623 (1243-4964)   |                         | 30 (14-57)                  |                                  |
| 2003 | West Bengal     |                          |                               |                                   |                                        |                                 |                                      |                                          |                                               | 2094 (988-3936)           |                                | 24 (11-45)                         |                                         | 2387 (1122-4470)   |                         | 27 (13-52)                  |                                  |

Webappendix 12: Hib cases in India by state, year, and HIV status

| Year | State          | Pneumonia cases          |                               |                                   |                                        | Severe pneumonia cases          |                                      |                                          |                                               | Meningitis cases          |                                |                                    |                                         | NPMV Cases          |                          |                              |                                   |
|------|----------------|--------------------------|-------------------------------|-----------------------------------|----------------------------------------|---------------------------------|--------------------------------------|------------------------------------------|-----------------------------------------------|---------------------------|--------------------------------|------------------------------------|-----------------------------------------|---------------------|--------------------------|------------------------------|-----------------------------------|
|      |                | Hib pneumonia cases (UR) | Hib pneumonia cases, HIV (UR) | Hib pneumonia incidence rate (UR) | Hib pneumonia incidence rate, HIV (UR) | Hib severe pneumonia cases (UR) | Hib severe pneumonia cases, HIV (UR) | Hib severe pneumonia incidence rate (UR) | Hib severe pneumonia incidence rate, HIV (UR) | Hib meningitis cases (UR) | Hib meningitis cases, HIV (UR) | Hib meningitis incidence rate (UR) | Hib meningitis incidence rate, HIV (UR) | Hib NPMV cases (UR) | Hib NPMV cases, HIV (UR) | Hib NPMV incidence rate (UR) | Hib NPMV incidence rate, HIV (UR) |
| 2000 | Andhra Pradesh | 208573 (190431-340787)   |                               | 2724 (2487-4450)                  |                                        | 41073 (24592-82901)             |                                      | 536 (321-1083)                           |                                               | 3073 (141-4556)           |                                | 40 (19-89)                         |                                         | 529 (248-784)       |                          | 7 (3-10)                     |                                   |
| 2001 | Andhra Pradesh |                          |                               |                                   |                                        |                                 |                                      |                                          | 40 (19-81)                                    |                           | 1064 (481-2463)                |                                    | 10 (5-19)                               |                     | 1024 (461-2300)          |                              | 13 (6-20)                         |
| 2002 | Andhra Pradesh |                          |                               |                                   |                                        |                                 |                                      |                                          | 3011 (1319-4549)                              |                           | 39 (17-60)                     |                                    | 1015 (445-1534)                         |                     | 13 (6-20)                |                              | 13 (6-20)                         |
| 2003 | Andhra Pradesh |                          |                               |                                   |                                        |                                 |                                      |                                          | 2000 (1383-2626)                              |                           | 39 (17-60)                     |                                    | 988 (433-1492)                          |                     | 13 (6-20)                |                              | 13 (6-20)                         |
| 2004 | Andhra Pradesh |                          |                               |                                   |                                        |                                 |                                      |                                          | 2824 (1237-4265)                              |                           | 38 (16-57)                     |                                    | 847 (417-1438)                          |                     | 12 (5-19)                |                              | 12 (5-19)                         |
| 2005 | Andhra Pradesh |                          |                               |                                   |                                        |                                 |                                      |                                          | 2680 (1171-4050)                              |                           | 36 (16-54)                     |                                    | 903 (395-1385)                          |                     | 11 (5-16)                |                              | 11 (5-16)                         |
| 2006 | Andhra Pradesh |                          |                               |                                   |                                        |                                 |                                      |                                          | 2520 (1103-3824)                              |                           | 34 (15-52)                     |                                    | 852 (372-1295)                          |                     | 11 (5-16)                |                              | 11 (5-16)                         |
| 2007 | Andhra Pradesh |                          |                               |                                   |                                        |                                 |                                      |                                          | 2345 (1020-3546)                              |                           | 32 (14-48)                     |                                    | 791 (344-1196)                          |                     | 11 (5-16)                |                              | 11 (5-16)                         |
| 2008 | Andhra Pradesh |                          |                               |                                   |                                        |                                 |                                      |                                          | 2152 (916-3355)                               |                           | 30 (13-48)                     |                                    | 732 (315-1095)                          |                     | 11 (5-16)                |                              | 11 (5-16)                         |
| 2009 | Andhra Pradesh |                          |                               |                                   |                                        |                                 |                                      |                                          | 1941 (826-2952)                               |                           | 27 (11-41)                     |                                    | 654 (278-995)                           |                     | 10 (4-14)                |                              | 10 (4-14)                         |
| 2010 | Andhra Pradesh |                          |                               |                                   |                                        |                                 |                                      |                                          | 1710 (717-2630)                               |                           | 24 (9-33)                      |                                    | 579 (242-897)                           |                     | 9 (3-12)                 |                              | 9 (3-12)                          |
| 2011 | Andhra Pradesh |                          |                               |                                   |                                        |                                 |                                      |                                          | 1550 (612-2328)                               |                           | 22 (8-33)                      |                                    | 508 (208-782)                           |                     | 9 (3-10)                 |                              | 9 (3-10)                          |
| 2012 | Andhra Pradesh |                          |                               |                                   |                                        |                                 |                                      |                                          | 1310 (525-2020)                               |                           | 19 (8-29)                      |                                    | 442 (177-684)                           |                     | 8 (2-9)                  |                              | 8 (2-9)                           |
| 2013 | Andhra Pradesh |                          |                               |                                   |                                        |                                 |                                      |                                          | 1161 (465-1795)                               |                           | 17 (7-27)                      |                                    | 391 (157-605)                           |                     | 8 (2-9)                  |                              | 8 (2-9)                           |
| 2014 | Andhra Pradesh |                          |                               |                                   |                                        |                                 |                                      |                                          | 1038 (415-1604)                               |                           | 16 (6-24)                      |                                    | 350 (140-541)                           |                     | 8 (2-9)                  |                              | 8 (2-9)                           |
| 2015 | Andhra Pradesh |                          |                               |                                   |                                        |                                 |                                      |                                          | 821 (351-920)                                 |                           | 15 (5-23)                      |                                    | 315 (126-509)                           |                     | 7 (3-10)                 |                              | 7 (3-10)                          |
| 2000 | Assam          |                          |                               |                                   |                                        |                                 |                                      |                                          | 24 (8-39)                                     |                           | 16 (6-26)                      |                                    | 8 (3-13)                                |                     | 5 (2-8)                  |                              | 5 (2-8)                           |
| 2001 | Assam          |                          |                               |                                   |                                        |                                 |                                      |                                          | 23 (8-37)                                     |                           | 15 (6-23)                      |                                    | 8 (3-12)                                |                     | 5 (2-8)                  |                              | 5 (2-8)                           |
| 2002 | Assam          |                          |                               |                                   |                                        |                                 |                                      |                                          | 23 (8-37)                                     |                           | 15 (6-23)                      |                                    | 8 (3-12)                                |                     | 5 (2-8)                  |                              | 5 (2-8)                           |
| 2003 | Assam          |                          |                               |                                   |                                        |                                 |                                      |                                          | 24 (8-39)                                     |                           | 15 (6-24)                      |                                    | 8 (3-13)                                |                     | 5 (2-8)                  |                              | 5 (2-8)                           |
| 2004 | Assam          |                          |                               |                                   |                                        |                                 |                                      |                                          | 25 (9-41)                                     |                           | 16 (6-26)                      |                                    | 9 (3-15)                                |                     | 5 (2-8)                  |                              | 5 (2-8)                           |
| 2005 | Assam          |                          |                               |                                   |                                        |                                 |                                      |                                          | 27 (10-43)                                    |                           | 17 (6-27)                      |                                    | 9 (3-15)                                |                     | 5 (2-8)                  |                              | 5 (2-8)                           |
| 2006 | Assam          |                          |                               |                                   |                                        |                                 |                                      |                                          | 22 (12-49)                                    |                           | 20 (8-30)                      |                                    | 11 (6-16)                               |                     | 5 (2-8)                  |                              | 5 (2-8)                           |
| 2007 | Assam          |                          |                               |                                   |                                        |                                 |                                      |                                          | 32 (14-48)                                    |                           | 20 (9-30)                      |                                    | 11 (6-16)                               |                     | 5 (2-8)                  |                              | 5 (2-8)                           |
| 2008 | Assam          |                          |                               |                                   |                                        |                                 |                                      |                                          | 33 (15-50)                                    |                           | 21 (9-31)                      |                                    | 11 (6-17)                               |                     | 5 (2-8)                  |                              | 5 (2-8)                           |
| 2009 | Assam          |                          |                               |                                   |                                        |                                 |                                      |                                          | 33 (15-50)                                    |                           | 20 (8-31)                      |                                    | 11 (6-17)                               |                     | 5 (2-8)                  |                              | 5 (2-8)                           |
| 2010 | Assam          |                          |                               |                                   |                                        |                                 |                                      |                                          | 30 (11-47)                                    |                           | 19 (7-30)                      |                                    | 10 (4-16)                               |                     | 5 (2-8)                  |                              | 5 (2-8)                           |
| 2011 | Assam          |                          |                               |                                   |                                        |                                 |                                      |                                          | 27 (10-44)                                    |                           | 17 (6-27)                      |                                    | 9 (3-15)                                |                     | 5 (2-8)                  |                              | 5 (2-8)                           |
| 2012 | Assam          |                          |                               |                                   |                                        |                                 |                                      |                                          | 25 (9-41)                                     |                           | 16 (6-26)                      |                                    | 8 (3-14)                                |                     | 5 (2-8)                  |                              | 5 (2-8)                           |
| 2013 | Assam          |                          |                               |                                   |                                        |                                 |                                      |                                          | 24 (8-38)                                     |                           | 15 (6-25)                      |                                    | 8 (3-13)                                |                     | 5 (2-8)                  |                              | 5 (2-8)                           |
| 2014 | Assam          |                          |                               |                                   |                                        |                                 |                                      |                                          | 23 (8-37)                                     |                           | 15 (6-24)                      |                                    | 8 (3-13)                                |                     | 5 (2-8)                  |                              | 5 (2-8)                           |
| 2015 | Assam          |                          |                               |                                   |                                        |                                 |                                      |                                          | 23 (8-37)                                     |                           | 15 (6-24)                      |                                    | 8 (3-13)                                |                     | 5 (2-8)                  |                              | 5 (2-8)                           |
| 2000 | Bihar          | 1930 (1403-2607)         |                               | 4 (4-6)                           |                                        | 302 (181-618)                   |                                      | 1 (0-2)                                  |                                               | 195 (117-304)             |                                | 0 (0-0)                            |                                         | 7 (3-11)            |                          | 4 (2-7)                      |                                   |
| 2001 | Bihar          | 89076 (81325-145441)     |                               | 2593 (2305-4517)                  |                                        | 17445 (15505-3413)              |                                      | 511 (306-1031)                           |                                               | 1334 (617-333)            |                                | 39 (15-60)                         |                                         | 230 (88-355)        |                          | 7 (3-10)                     |                                   |
| 2002 | Bihar          |                          |                               |                                   |                                        |                                 |                                      |                                          | 1292 (496-1919)                               |                           | 37 (14-58)                     |                                    | 223 (85-344)                            |                     | 6 (2-10)                 |                              | 6 (2-10)                          |
| 2003 | Bihar          |                          |                               |                                   |                                        |                                 |                                      |                                          | 1265 (486-1937)                               |                           | 36 (14-56)                     |                                    | 218 (84-337)                            |                     | 6 (2-10)                 |                              | 6 (2-10)                          |
| 2004 | Bihar          |                          |                               |                                   |                                        |                                 |                                      |                                          | 1286 (483-1943)                               |                           | 36 (14-55)                     |                                    | 216 (83-335)                            |                     | 6 (2-9)                  |                              | 6 (2-9)                           |
| 2005 | Bihar          |                          |                               |                                   |                                        |                                 |                                      |                                          | 1282 (485-1943)                               |                           | 36 (14-55)                     |                                    | 217 (84-336)                            |                     | 6 (2-9)                  |                              | 6 (2-9)                           |
| 2006 | Bihar          |                          |                               |                                   |                                        |                                 |                                      |                                          | 1276 (487-1949)                               |                           | 36 (14-55)                     |                                    | 220 (86-339)                            |                     | 6 (2-10)                 |                              | 6 (2-10)                          |
| 2007 | Bihar          |                          |                               |                                   |                                        |                                 |                                      |                                          | 1284 (510-1919)                               |                           | 36 (14-56)                     |                                    | 223 (88-343)                            |                     | 6 (2-10)                 |                              | 6 (2-10)                          |
| 2008 | Bihar          |                          |                               |                                   |                                        |                                 |                                      |                                          | 1312 (525-2012)                               |                           | 37 (15-52)                     |                                    | 229 (90-346)                            |                     | 6 (2-10)                 |                              | 6 (2-10)                          |
| 2009 | Bihar          |                          |                               |                                   |                                        |                                 |                                      |                                          | 1328 (531-2038)                               |                           | 37 (15-57)                     |                                    | 229 (91-351)                            |                     | 6 (2-10)                 |                              | 6 (2-10)                          |
| 2010 | Bihar          |                          |                               |                                   |                                        |                                 |                                      |                                          | 1331 (532-2042)                               |                           | 37 (15-57)                     |                                    | 231 (92-353)                            |                     | 6 (2-10)                 |                              | 6 (2-10)                          |
| 2011 | Bihar          |                          |                               |                                   |                                        |                                 |                                      |                                          | 1332 (533-2043)                               |                           | 37 (15-57)                     |                                    | 229 (92-352)                            |                     | 6 (2-10)                 |                              | 6 (2-10)                          |
| 2012 | Bihar          |                          |                               |                                   |                                        |                                 |                                      |                                          | 1328 (531-2038)                               |                           | 37 (15-57)                     |                                    | 229 (92-351)                            |                     | 6 (2-10)                 |                              | 6 (2-10)                          |
| 2013 | Bihar          |                          |                               |                                   |                                        |                                 |                                      |                                          | 1321 (528-2027)                               |                           | 37 (15-57)                     |                                    | 227 (91-349)                            |                     | 6 (2-10)                 |                              | 6 (2-10)                          |
| 2014 | Bihar          |                          |                               |                                   |                                        |                                 |                                      |                                          | 1332 (533-2044)                               |                           | 38 (15-58)                     |                                    | 229 (92-352)                            |                     | 6 (2-10)                 |                              | 6 (2-10)                          |
| 2015 | Bihar          | 21225 (19379-24679)      | 84 (48-88)                    | 605 (552-688)                     | 2 (1-2)                                | 4181 (2504-8439)                | 11 (6-21)                            | 119 (71-240)                             | 0 (0-0)                                       | 1331 (532-2042)           | 38 (15-58)                     | 229 (92-352)                       | 165 (85-251)                            | 0 (0-1)             | 7 (2-7)                  | 0 (0-0)                      |                                   |
| 2000 | Bihar          | 488221 (443395-70849)    |                               | 3960 (3614-6470)                  |                                        | 96340 (87653-104450)            |                                      | 780 (467-1379)                           |                                               | 7146 (3371-16044)         |                                | 86 (36-124)                        |                                         | 1331 (532-2042)     |                          | 16 (8-16)                    |                                   |
| 2001 | Bihar          |                          |                               |                                   |                                        |                                 |                                      |                                          | 7027 (3181-10413)                             |                           | 66 (26-83)                     |                                    | 1210 (671-1793)                         |                     | 10 (4-14)                |                              | 10 (4-14)                         |
| 2002 | Bihar          |                          |                               |                                   |                                        |                                 |                                      |                                          | 6859 (3235-10144)                             |                           | 65 (26-82)                     |                                    | 1181 (658-1769)                         |                     | 9 (4-13)                 |                              | 9 (4-13)                          |
| 2003 | Bihar          |                          |                               |                                   |                                        |                                 |                                      |                                          | 6706 (3165-9932)                              |                           | 62 (24-76)                     |                                    | 1155 (645-1710)                         |                     | 9 (4-13)                 |                              | 9 (4-13)                          |
| 2004 | Bihar          |                          |                               |                                   |                                        |                                 |                                      |                                          | 6500 (3088-9684)                              |                           | 60 (23-75)                     |                                    | 1128 (632-1689)                         |                     | 9 (4-13)                 |                              | 9 (4-13)                          |
| 2005 | Bihar          |                          |                               |                                   |                                        |                                 |                                      |                                          | 6397 (2990-9491)                              |                           | 48 (22-71)                     |                                    | 1102 (616-1634)                         |                     | 8 (4-12)                 |                              | 8 (4-12)                          |
| 2006 | Bihar          |                          |                               |                                   |                                        |                                 |                                      |                                          | 6276 (274-94925)                              |                           | 46 (20-70)                     |                                    | 2116 (915-3211)                         |                     | 16 (7-24)                |                              | 16 (7-24)                         |
| 2007 | Bihar          |                          |                               |                                   |                                        |                                 |                                      |                                          | 6005 (2668-9273)                              |                           | 44 (19-68)                     |                                    | 2054 (879-3126)                         |                     | 16 (6-23)                |                              | 16 (6-23)                         |
| 2008 | Bihar          |                          |                               |                                   |                                        |                                 |                                      |                                          | 5870 (2511-8928)                              |                           | 42 (18-64)                     |                                    | 1979 (847-3009)                         |                     | 14 (8-22)                |                              | 14 (8-22)                         |
| 2009 | Bihar          |                          |                               |                                   |                                        |                                 |                                      |                                          | 5688 (2388-8691)                              |                           | 40 (17-61)                     |                                    | 1853 (805-2921)                         |                     | 13 (8-20)                |                              | 13 (8-20)                         |
| 2010 | Bihar          |                          |                               |                                   |                                        |                                 |                                      |                                          | 5286 (2238-7950)                              |                           | 37 (16-56)                     |                                    | 1765 (755-2683)                         |                     | 13 (5-19)                |                              | 13 (5-19)                         |
| 2011 | Bihar          |                          |                               |                                   |                                        |                                 |                                      |                                          | 4844 (2073-7370)                              |                           | 34 (15-52)                     |                                    | 1634 (699-2484)                         |                     | 11 (5-17)                |                              | 11 (5-17)                         |
| 2012 | Bihar          |                          |                               |                                   |                                        |                                 |                                      |                                          | 4396 (1888-6685)                              |                           | 31 (13-47)                     |                                    | 1482 (634-2254)                         |                     | 10 (4-16)                |                              | 10 (4-16)                         |
| 2013 | Bihar          |                          |                               |                                   |                                        |                                 |                                      |                                          | 3996 (1739-6075)                              |                           | 28 (12-42)                     |                                    | 1347 (576-2048)                         |                     | 9 (4-14)                 |                              | 9 (4-14)                          |
| 2014 | Bihar          |                          |                               |                                   |                                        |                                 |                                      |                                          | 3665 (1625-5421)                              |                           | 25 (10-38)                     |                                    | 1202 (514-1827)                         |                     | 8 (4-13)                 |                              | 8 (4-13)                          |
| 2015 | Bihar          | 59162 (54018-68965)      | 149 (136-244)                 | 409 (374-668)                     | 1 (1-2)                                | 11653 (6977-23519)              | 29 (18-59)                           | 81 (48-133)                              | 0 (0-0)                                       | 605 (257-858)             | 11 (2-12)                      | 4 (2-6)                            | 179 (77-272)                            | 0 (0-1)             | 11 (5-12)                | 0 (0-0)                      |                                   |
| 2000 | Chhattisgarh   |                          |                               |                                   |                                        |                                 |                                      |                                          | 656 (385-1056)                                |                           | 17 (6-28)                      |                                    | 117 (45-262)                            |                     | 6 (2-9)                  |                              | 6 (2-9)                           |
| 2001 | Chhattisgarh   | 108373 (89471-17070)     |                               | 384 (335-636)                     |                                        | 21392 (12785-43097)             |                                      | 787 (459-1549)                           |                                               | 976 (381-1504)            |                                | 35 (14-54)                         |                                         | 166 (65-259)        |                          | 6 (2-9)                      |                                   |
| 2002 | Chhattisgarh   |                          |                               |                                   |                                        |                                 |                                      |                                          | 959 (371-1466)                                |                           | 34 (13-52)                     |                                    | 164 (64-253)                            |                     | 6 (2-9)                  |                              | 6 (2-9)                           |
| 2003 | Chhattisgarh   |                          |                               |                                   |                                        |                                 |                                      |                                          | 929 (383-1435)                                |                           | 33 (13-51)                     |                                    | 160 (63-247)                            |                     | 6 (2-9)                  |                              | 6 (2-9)                           |
| 2004 | Chhattisgarh   |                          |                               |                                   |                                        |                                 |                                      |                                          | 904 (354-1397)                                |                           | 32 (12-49)                     |                                    | 156 (61-241)                            |                     | 6 (2-9)                  |                              | 6 (2-9)                           |
| 2005 | Chhattisgarh   |                          |                               |                                   |                                        |                                 |                                      |                                          | 895 (348-1397)                                |                           | 31 (13-48)                     |                                    | 154 (62-240)                            |                     | 6 (2-9)                  |                              | 6 (2-9)                           |
| 2006 | Chhattisgarh   |                          |                               |                                   |                                        |                                 |                                      |                                          | 919 (385-1394)                                |                           | 32 (13-49)                     |                                    | 158 (66-240)                            |                     | 6 (2-9)                  |                              | 6 (2-9)                           |
| 2007 | Chhattisgarh   |                          |                               |                                   |                                        |                                 |                                      |                                          | 905 (385-1394)                                |                           | 32 (13-49)                     |                                    | 158 (66-240)                            |                     | 6 (2-9)                  |                              | 6 (2-9)                           |
| 2008 | Chhattisgarh   |                          |                               |                                   |                                        |                                 |                                      |                                          | 899 (383-1385)                                |                           | 31 (13-48)                     |                                    | 153 (62-240)                            |                     | 6 (2-9)                  |                              | 6 (2-9)                           |
| 2009 | Chhattisgarh   |                          |                               |                                   |                                        |                                 |                                      |                                          | 866 (330-1334)                                |                           | 30 (12-47)                     |                                    | 149 (61-240)                            |                     | 6 (2-9)                  |                              | 6 (2-9)                           |
| 2010 | Chhattisgarh   |                          |                               |                                   |                                        |                                 |                                      |                                          | 812 (288-1252)                                |                           | 29 (12-44)                     |                                    | 141 (61-240)                            |                     | 6 (2-9)                  |                              | 6 (2-9)                           |
| 2011 | Chhattisgarh   |                          |                               |                                   |                                        |                                 |                                      |                                          | 769 (311-1188)                                |                           | 27 (11-42)                     |                                    | 129 (55-200)                            |                     | 6 (2-9)                  |                              | 6 (2-9)                           |
| 20   |                |                          |                               |                                   |                                        |                                 |                                      |                                          |                                               |                           |                                |                                    |                                         |                     |                          |                              |                                   |





| Year | State     | Hb pneumonia cases (UR) | Hb pneumonia cases, HIV (UR) | Hb pneumonia incidence rate (UR) | Hb pneumonia incidence rate, HIV (UR) | Hb severe pneumonia cases (UR) | Hb severe pneumonia cases, HIV (UR) | Hb severe pneumonia incidence rate (UR) | Hb severe pneumonia incidence rate, HIV (UR) | Hb meningitis cases (UR) | Hb meningitis cases, HIV (UR) | Hb meningitis incidence rate (UR) | Hb meningitis incidence rate, HIV (UR) | Hb NPMI cases (UR) | Hb NPMI cases, HIV (UR) | Hb NPMI incidence rate (UR) | Hb NPMI incidence rate, HIV (UR) |
|------|-----------|-------------------------|------------------------------|----------------------------------|---------------------------------------|--------------------------------|-------------------------------------|-----------------------------------------|----------------------------------------------|--------------------------|-------------------------------|-----------------------------------|----------------------------------------|--------------------|-------------------------|-----------------------------|----------------------------------|
| 2004 | Manipur   |                         |                              |                                  |                                       |                                |                                     |                                         |                                              | 21 (3.35)                |                               | 8 (1.14)                          |                                        | 7 (1.12)           |                         | 3 (0.5)                     |                                  |
| 2005 | Manipur   |                         |                              |                                  |                                       |                                |                                     |                                         |                                              | 20 (2.35)                |                               | 7 (1.12)                          |                                        | 7 (1.12)           |                         | 3 (0.5)                     |                                  |
| 2006 | Manipur   |                         |                              |                                  |                                       |                                |                                     |                                         |                                              | 20 (2.34)                |                               | 8 (1.13)                          |                                        | 7 (1.12)           |                         | 3 (0.4)                     |                                  |
| 2007 | Manipur   |                         |                              |                                  |                                       |                                |                                     |                                         |                                              | 20 (2.34)                |                               | 7 (1.12)                          |                                        | 7 (1.12)           |                         | 2 (0.4)                     |                                  |
| 2008 | Manipur   |                         |                              |                                  |                                       |                                |                                     |                                         |                                              | 20 (2.35)                |                               | 7 (1.12)                          |                                        | 7 (1.12)           |                         | 2 (0.4)                     |                                  |
| 2009 | Manipur   |                         |                              |                                  |                                       |                                |                                     |                                         |                                              | 21 (3.36)                |                               | 8 (1.13)                          |                                        | 7 (1.12)           |                         | 3 (0.5)                     |                                  |
| 2010 | Manipur   |                         |                              |                                  |                                       |                                |                                     |                                         |                                              | 21 (3.36)                |                               | 8 (1.14)                          |                                        | 7 (1.13)           |                         | 3 (0.5)                     |                                  |
| 2011 | Manipur   |                         |                              |                                  |                                       |                                |                                     |                                         |                                              | 23 (3.40)                |                               | 8 (1.14)                          |                                        | 8 (1.14)           |                         | 3 (0.5)                     |                                  |
| 2012 | Manipur   |                         |                              |                                  |                                       |                                |                                     |                                         |                                              | 24 (3.41)                |                               | 8 (1.14)                          |                                        | 8 (1.14)           |                         | 3 (0.5)                     |                                  |
| 2013 | Manipur   |                         |                              |                                  |                                       |                                |                                     |                                         |                                              | 25 (4.42)                |                               | 8 (1.14)                          |                                        | 8 (1.14)           |                         | 3 (0.5)                     |                                  |
| 2014 | Manipur   |                         |                              |                                  |                                       |                                |                                     |                                         |                                              | 25 (4.42)                |                               | 8 (1.14)                          |                                        | 8 (1.14)           |                         | 3 (0.5)                     |                                  |
| 2015 | Manipur   | 1909 (1743-3119)        | 5 (4.8)                      | 637 (562-1041)                   | 2 (1.3)                               | 376 (225-759)                  | 1 (1.2)                             | 125 (75-253)                            | 0 (0.1)                                      | 22 (2.37)                |                               | 7 (1.12)                          |                                        | 2 (0.4)            | 0 (0.0)                 | 2 (0.4)                     | 0 (0.0)                          |
| 2000 | Meghalaya | 9382 (8539-10281)       |                              | 2688 (2363-4229)                 |                                       | 1841 (1103-3717)               |                                     | 510 (305-1029)                          |                                              | 187 (71.235)             |                               | 44 (20.46)                        |                                        | 27 (12.40)         |                         | 7 (3.11)                    |                                  |
| 2001 | Meghalaya |                         |                              |                                  |                                       |                                |                                     |                                         |                                              | 163 (74.243)             |                               | 44 (20.47)                        |                                        | 28 (13.44)         |                         | 8 (3.11)                    |                                  |
| 2002 | Meghalaya |                         |                              |                                  |                                       |                                |                                     |                                         |                                              | 169 (77.253)             |                               | 40 (20.47)                        |                                        | 29 (13.44)         |                         | 8 (3.11)                    |                                  |
| 2003 | Meghalaya |                         |                              |                                  |                                       |                                |                                     |                                         |                                              | 177 (80.265)             |                               | 45 (21.46)                        |                                        | 31 (14.46)         |                         | 8 (3.11)                    |                                  |
| 2004 | Meghalaya |                         |                              |                                  |                                       |                                |                                     |                                         |                                              | 186 (84.279)             |                               | 47 (21.70)                        |                                        | 32 (15.46)         |                         | 8 (3.12)                    |                                  |
| 2005 | Meghalaya |                         |                              |                                  |                                       |                                |                                     |                                         |                                              | 196 (91.292)             |                               | 48 (22.72)                        |                                        | 34 (16.46)         |                         | 8 (3.12)                    |                                  |
| 2006 | Meghalaya |                         |                              |                                  |                                       |                                |                                     |                                         |                                              | 205 (97.304)             |                               | 49 (23.73)                        |                                        | 35 (17.52)         |                         | 8 (3.12)                    |                                  |
| 2007 | Meghalaya |                         |                              |                                  |                                       |                                |                                     |                                         |                                              | 211 (93.310)             |                               | 50 (24.73)                        |                                        | 36 (18.53)         |                         | 8 (3.12)                    |                                  |
| 2008 | Meghalaya |                         |                              |                                  |                                       |                                |                                     |                                         |                                              | 213 (102.312)            |                               | 49 (24.72)                        |                                        | 37 (18.54)         |                         | 8 (3.12)                    |                                  |
| 2009 | Meghalaya |                         |                              |                                  |                                       |                                |                                     |                                         |                                              | 206 (94.307)             |                               | 47 (21.70)                        |                                        | 35 (16.53)         |                         | 8 (3.12)                    |                                  |
| 2010 | Meghalaya |                         |                              |                                  |                                       |                                |                                     |                                         |                                              | 203 (93.307)             |                               | 46 (20.68)                        |                                        | 35 (16.53)         |                         | 8 (3.12)                    |                                  |
| 2011 | Meghalaya |                         |                              |                                  |                                       |                                |                                     |                                         |                                              | 199 (82.303)             |                               | 44 (19.67)                        |                                        | 34 (14.52)         |                         | 8 (3.12)                    |                                  |
| 2012 | Meghalaya |                         |                              |                                  |                                       |                                |                                     |                                         |                                              | 195 (87.300)             |                               | 43 (17.66)                        |                                        | 33 (15.52)         |                         | 7 (3.11)                    |                                  |
| 2013 | Meghalaya |                         |                              |                                  |                                       |                                |                                     |                                         |                                              | 196 (78.302)             |                               | 42 (17.65)                        |                                        | 34 (13.52)         |                         | 7 (3.11)                    |                                  |
| 2014 | Meghalaya |                         |                              |                                  |                                       |                                |                                     |                                         |                                              | 199 (79.305)             |                               | 42 (17.46)                        |                                        | 34 (14.53)         |                         | 7 (3.11)                    |                                  |
| 2015 | Meghalaya | 6681 (6009-10753)       | 17 (15.27)                   | 1387 (1267-2267)                 | 4 (3.6)                               | 1296 (776-2617)                | 3 (2.7)                             | 373 (184-552)                           | 1 (0.1)                                      | 185 (72.284)             |                               | 39 (18.50)                        |                                        | 34 (15.53)         |                         | 8 (3.12)                    | 0 (0.0)                          |
| 2000 | Mizoram   | 2566 (2343-4192)        |                              | 2277 (2079-3721)                 |                                       | 505 (302-1019)                 |                                     | 448 (268-905)                           |                                              | 33 (12.52)               |                               | 30 (11.46)                        |                                        | 6 (2.9)            |                         | 5 (2.8)                     |                                  |
| 2001 | Mizoram   |                         |                              |                                  |                                       |                                |                                     |                                         |                                              | 32 (12.50)               |                               | 28 (10.44)                        |                                        | 6 (2.9)            |                         | 5 (2.8)                     |                                  |
| 2002 | Mizoram   |                         |                              |                                  |                                       |                                |                                     |                                         |                                              | 32 (12.50)               |                               | 27 (10.42)                        |                                        | 5 (2.9)            |                         | 5 (2.7)                     |                                  |
| 2003 | Mizoram   |                         |                              |                                  |                                       |                                |                                     |                                         |                                              | 32 (12.49)               |                               | 26 (10.41)                        |                                        | 5 (2.8)            |                         | 5 (2.7)                     |                                  |
| 2004 | Mizoram   |                         |                              |                                  |                                       |                                |                                     |                                         |                                              | 32 (12.49)               |                               | 26 (10.40)                        |                                        | 5 (2.8)            |                         | 4 (2.7)                     |                                  |
| 2005 | Mizoram   |                         |                              |                                  |                                       |                                |                                     |                                         |                                              | 32 (12.49)               |                               | 25 (10.40)                        |                                        | 5 (2.8)            |                         | 4 (2.7)                     |                                  |
| 2006 | Mizoram   |                         |                              |                                  |                                       |                                |                                     |                                         |                                              | 32 (12.50)               |                               | 25 (10.39)                        |                                        | 5 (2.8)            |                         | 4 (2.7)                     |                                  |
| 2007 | Mizoram   |                         |                              |                                  |                                       |                                |                                     |                                         |                                              | 32 (12.50)               |                               | 25 (10.39)                        |                                        | 5 (2.8)            |                         | 4 (2.7)                     |                                  |
| 2008 | Mizoram   |                         |                              |                                  |                                       |                                |                                     |                                         |                                              | 33 (12.51)               |                               | 25 (10.39)                        |                                        | 5 (2.8)            |                         | 4 (2.7)                     |                                  |
| 2009 | Mizoram   |                         |                              |                                  |                                       |                                |                                     |                                         |                                              | 33 (12.52)               |                               | 25 (10.39)                        |                                        | 5 (2.8)            |                         | 4 (2.7)                     |                                  |
| 2010 | Mizoram   |                         |                              |                                  |                                       |                                |                                     |                                         |                                              | 34 (13.52)               |                               | 25 (10.39)                        |                                        | 5 (2.8)            |                         | 4 (2.7)                     |                                  |
| 2011 | Mizoram   |                         |                              |                                  |                                       |                                |                                     |                                         |                                              | 35 (14.53)               |                               | 26 (10.39)                        |                                        | 6 (2.9)            |                         | 4 (2.7)                     |                                  |
| 2012 | Mizoram   |                         |                              |                                  |                                       |                                |                                     |                                         |                                              | 35 (14.54)               |                               | 26 (10.39)                        |                                        | 6 (2.9)            |                         | 4 (2.7)                     |                                  |
| 2013 | Mizoram   |                         |                              |                                  |                                       |                                |                                     |                                         |                                              | 36 (14.55)               |                               | 26 (11.40)                        |                                        | 6 (2.9)            |                         | 4 (2.7)                     |                                  |
| 2014 | Mizoram   |                         |                              |                                  |                                       |                                |                                     |                                         |                                              | 36 (14.55)               |                               | 26 (11.40)                        |                                        | 6 (2.9)            |                         | 4 (2.7)                     |                                  |
| 2015 | Mizoram   | 712 (650-1163)          | 2 (2.3)                      | 511 (467-835)                    | 1 (1.2)                               | 140 (84-283)                   | 0 (0.1)                             | 101 (60-203)                            | 0 (0.1)                                      | 32 (12.51)               |                               | 23 (8.46)                         |                                        | 11 (4.15)          |                         | 6 (3.12)                    | 0 (0.0)                          |
| 2000 | Nagaland  | 5233 (4778-8550)        |                              | 2461 (2247-4022)                 |                                       | 1030 (617-2079)                |                                     | 485 (290-978)                           |                                              | 23 (8.37)                |                               | 11 (4.18)                         |                                        | 8 (3.15)           |                         | 4 (1.6)                     |                                  |
| 2001 | Nagaland  |                         |                              |                                  |                                       |                                |                                     |                                         |                                              | 25 (9.39)                |                               | 12 (4.19)                         |                                        | 8 (3.15)           |                         | 4 (1.6)                     |                                  |
| 2002 | Nagaland  |                         |                              |                                  |                                       |                                |                                     |                                         |                                              | 26 (9.42)                |                               | 12 (4.19)                         |                                        | 9 (3.14)           |                         | 4 (1.6)                     |                                  |
| 2003 | Nagaland  |                         |                              |                                  |                                       |                                |                                     |                                         |                                              | 26 (9.45)                |                               | 13 (4.21)                         |                                        | 9 (3.15)           |                         | 4 (1.7)                     |                                  |
| 2004 | Nagaland  |                         |                              |                                  |                                       |                                |                                     |                                         |                                              | 29 (10.47)               |                               | 13 (4.21)                         |                                        | 10 (3.15)          |                         | 5 (1.7)                     |                                  |
| 2005 | Nagaland  |                         |                              |                                  |                                       |                                |                                     |                                         |                                              | 30 (10.48)               |                               | 14 (4.22)                         |                                        | 10 (3.16)          |                         | 5 (1.7)                     |                                  |
| 2006 | Nagaland  |                         |                              |                                  |                                       |                                |                                     |                                         |                                              | 30 (9.48)                |                               | 14 (4.22)                         |                                        | 10 (3.16)          |                         | 5 (1.7)                     |                                  |
| 2007 | Nagaland  |                         |                              |                                  |                                       |                                |                                     |                                         |                                              | 29 (9.48)                |                               | 13 (4.22)                         |                                        | 10 (3.16)          |                         | 4 (1.7)                     |                                  |
| 2008 | Nagaland  |                         |                              |                                  |                                       |                                |                                     |                                         |                                              | 29 (9.48)                |                               | 13 (4.21)                         |                                        | 10 (3.16)          |                         | 4 (1.7)                     |                                  |
| 2009 | Nagaland  |                         |                              |                                  |                                       |                                |                                     |                                         |                                              | 28 (8.45)                |                               | 13 (4.21)                         |                                        | 9 (3.15)           |                         | 4 (1.7)                     |                                  |
| 2010 | Nagaland  |                         |                              |                                  |                                       |                                |                                     |                                         |                                              | 28 (8.46)                |                               | 13 (4.21)                         |                                        | 9 (3.16)           |                         | 4 (1.7)                     |                                  |
| 2011 | Nagaland  |                         |                              |                                  |                                       |                                |                                     |                                         |                                              | 28 (8.45)                |                               | 13 (4.21)                         |                                        | 9 (3.15)           |                         | 4 (1.7)                     |                                  |
| 2012 | Nagaland  |                         |                              |                                  |                                       |                                |                                     |                                         |                                              | 27 (7.44)                |                               | 12 (3.20)                         |                                        | 9 (2.15)           |                         | 4 (1.7)                     |                                  |
| 2013 | Nagaland  |                         |                              |                                  |                                       |                                |                                     |                                         |                                              | 28 (7.43)                |                               | 12 (3.20)                         |                                        | 9 (2.14)           |                         | 4 (1.7)                     |                                  |
| 2014 | Nagaland  |                         |                              |                                  |                                       |                                |                                     |                                         |                                              | 25 (7.41)                |                               | 11 (3.19)                         |                                        | 8 (2.14)           |                         | 4 (1.6)                     |                                  |
| 2015 | Nagaland  | 2636 (2378-5564)        | 7 (6.11)                     | 1213 (1107-1982)                 | 3 (3.5)                               | 513 (327-1038)                 | 1 (1.3)                             | 238 (143-482)                           | 1 (0.1)                                      | 25 (7.41)                |                               | 10 (3.17)                         |                                        | 8 (2.14)           |                         | 4 (1.6)                     | 0 (0.0)                          |
| 2000 | Odisha    | 125261 (114366-205664)  |                              | 3085 (2817-5961)                 |                                       | 24661 (14766-49776)            |                                     | 607 (364-1252)                          |                                              | 2427 (959-5033)          |                               | 60 (25.51)                        |                                        | 418 (172.516)      |                         | 10 (4.16)                   |                                  |
| 2001 | Odisha    |                         |                              |                                  |                                       |                                |                                     |                                         |                                              | 2291 (94.3497)           |                               | 56 (23.85)                        |                                        | 395 (162.602)      |                         | 10 (4.15)                   |                                  |
| 2002 | Odisha    |                         |                              |                                  |                                       |                                |                                     |                                         |                                              | 2152 (86.3208)           |                               | 52 (22.80)                        |                                        | 371 (162.602)      |                         | 9 (3.14)                    |                                  |
| 2003 | Odisha    |                         |                              |                                  |                                       |                                |                                     |                                         |                                              | 2025 (83.3089)           |                               | 49 (20.75)                        |                                        | 349 (153.532)      |                         | 8 (3.13)                    |                                  |
| 2004 | Odisha    |                         |                              |                                  |                                       |                                |                                     |                                         |                                              | 1925 (77.2985)           |                               | 46 (19.70)                        |                                        | 326 (146.492)      |                         | 8 (3.13)                    |                                  |
| 2005 | Odisha    |                         |                              |                                  |                                       |                                |                                     |                                         |                                              | 1765 (72.2897)           |                               | 43 (17.65)                        |                                        | 304 (124.464)      |                         | 7 (3.11)                    |                                  |
| 2006 | Odisha    |                         |                              |                                  |                                       |                                |                                     |                                         |                                              | 1644 (68.2817)           |                               | 40 (15.61)                        |                                        | 283 (115.423)      |                         | 7 (3.10)                    |                                  |
| 2007 | Odisha    |                         |                              |                                  |                                       |                                |                                     |                                         |                                              | 1513 (61.2319)           |                               | 37 (15.56)                        |                                        | 261 (105.399)      |                         | 6 (3.10)                    |                                  |
| 2008 | Odisha    |                         |                              |                                  |                                       |                                |                                     |                                         |                                              | 1403 (56.2150)           |                               | 34 (14.52)                        |                                        | 242 (97.370)       |                         | 6 (2.9)                     |                                  |
| 2009 | Odisha    |                         |                              |                                  |                                       |                                |                                     |                                         |                                              | 1305 (52.1996)           |                               | 32 (13.48)                        |                                        | 224 (90.344)       |                         | 5 (2.8)                     |                                  |
| 2010 | Odisha    |                         |                              |                                  |                                       |                                |                                     |                                         |                                              | 1213 (48.1857)           |                               | 29 (12.45)                        |                                        | 209 (84.320)       |                         | 5 (2.8)                     |                                  |
| 2011 | Odisha    |                         |                              |                                  |                                       |                                |                                     |                                         |                                              | 1139 (45.1752)           |                               | 28 (14.54)                        |                                        | 204 (84.644)       |                         | 5 (2.8)                     |                                  |
| 2012 | Odisha    |                         |                              |                                  |                                       |                                |                                     |                                         |                                              | 1056 (38.1661)           |                               | 26 (10.41)                        |                                        | 156 (132.560)      |                         | 5 (3.14)                    |                                  |
| 2013 | Odisha    |                         |                              |                                  |                                       |                                |                                     |                                         |                                              | 953 (35.1341)            |                               | 25 (12.41)                        |                                        | 131 (122.511)      |                         | 5 (3.14)                    |                                  |
| 2014 | Odisha    |                         |                              |                                  |                                       |                                |                                     |                                         |                                              | 893 (33.1455)            |                               | 23 (8.35)                         |                                        | 101 (111.473)      |                         | 5 (3.12)                    |                                  |
| 2015 | Odisha    | 64286 (58655-105037)    | 162 (148-245)                | 1634 (1492-2670)                 | 4 (4.7)                               | 12603 (7562-25558)             | 32 (19.65)                          | 322 (193-450)                           | 1 (0.2)                                      | 717 (282-1127)           |                               | 18 (7.29)                         |                                        | 242 (89.380)       |                         | 6 (2.10)                    | 0 (0.0)                          |
| 2000 | Punjab    | 69076 (63066-128683)    |                              | 2551 (2603-4664)                 |                                       | 13602 (8144-27054)             |                                     | 561 (336-1133)                          |                                              | 1245 (466-2516)          |                               | 419 (23.19)                       |                                        | 419 (17.25)        |                         | 17 (8.23)                   |                                  |
| 2001 | Punjab    |                         |                              |                                  |                                       |                                |                                     |                                         |                                              | 1150 (50.1697)           |                               | 47 (23.70)                        |                                        | 389 (188.572)      |                         | 16 (8.23)                   |                                  |
| 2002 | Punjab    |                         |                              |                                  |                                       |                                |                                     |                                         |                                              | 1074 (50.1978)           |                               | 44 (24.65)                        |                                        | 362 (175.522)      |                         | 15 (7.22)                   |                                  |
| 2003 | Punjab    |                         |                              |                                  |                                       |                                |                                     |                                         |                                              | 1004 (48.1747)           |                               | 41 (20.60)                        |                                        | 339 (164.488)      |                         | 14 (7.20)                   |                                  |
| 2004 | Punjab    |                         |                              |                                  |                                       |                                |                                     |                                         |                                              | 946 (48.1934)            |                               | 39 (19.57)                        |                                        | 319 (155.470)      |                         | 13 (6.19)                   |                                  |
| 2005 | Punjab    |                         |                              |                                  |                                       |                                |                                     |                                         |                                              | 897 (44.1707)            |                               | 37 (18.54)                        |                                        | 302 (151.441)</    |                         |                             |                                  |

| Year | State           | Hb pneumonia cases (UR) | Hb pneumonia cases, HIV (UR) | Hb pneumonia incidence rate (UR) | Hb pneumonia incidence rate, HIV (UR) | Hb severe pneumonia cases (UR) | Hb severe pneumonia cases, HIV (UR) | Hb severe pneumonia incidence rate (UR) | Hb severe pneumonia incidence rate, HIV (UR) | Hb meningitis cases (UR) | Hb meningitis cases, HIV (UR) | Hb meningitis incidence rate (UR) | Hb meningitis incidence rate, HIV (UR) | Hb NPfM cases (UR) | Hb NPfM cases, HIV (UR) | Hb NPfM incidence rate (UR) | Hb NPfM incidence rate, HIV (UR) |
|------|-----------------|-------------------------|------------------------------|----------------------------------|---------------------------------------|--------------------------------|-------------------------------------|-----------------------------------------|----------------------------------------------|--------------------------|-------------------------------|-----------------------------------|----------------------------------------|--------------------|-------------------------|-----------------------------|----------------------------------|
| 2007 | Tami Nadu       |                         |                              |                                  |                                       |                                |                                     |                                         |                                              | 1062 (480-1972)          |                               | 18 (8-26)                         |                                        | 358 (165-530)      |                         | 6 (0-9)                     |                                  |
| 2008 | Tami Nadu       |                         |                              |                                  |                                       |                                |                                     |                                         |                                              | 998 (462-1483)           |                               | 17 (8-20)                         |                                        | 337 (156-500)      |                         | 6 (0-8)                     |                                  |
| 2009 | Tami Nadu       |                         |                              |                                  |                                       |                                |                                     |                                         |                                              | 936 (427-1410)           |                               | 16 (7-24)                         |                                        | 316 (144-475)      |                         | 5 (0-8)                     |                                  |
| 2010 | Tami Nadu       |                         |                              |                                  |                                       |                                |                                     |                                         |                                              | 879 (386-1342)           |                               | 10 (7-23)                         |                                        | 296 (134-452)      |                         | 5 (0-8)                     |                                  |
| 2011 | Tami Nadu       |                         |                              |                                  |                                       |                                |                                     |                                         |                                              | 834 (370-1353)           |                               | 14 (3-23)                         |                                        | 281 (97-456)       |                         | 5 (0-8)                     |                                  |
| 2012 | Tami Nadu       |                         |                              |                                  |                                       |                                |                                     |                                         |                                              | 188 (73-312)             |                               | 1 (0-2)                           |                                        | 64 (13-105)        |                         | 0 (0-1)                     |                                  |
| 2013 | Tami Nadu       |                         |                              |                                  |                                       |                                |                                     |                                         |                                              | 77 (15-124)              |                               | 0 (0-2)                           |                                        | 28 (4-43)          |                         | 0 (0-1)                     |                                  |
| 2014 | Tami Nadu       |                         |                              |                                  |                                       |                                |                                     |                                         |                                              | 63 (13-105)              |                               | 1 (0-2)                           |                                        | 21 (3-35)          |                         | 0 (0-1)                     |                                  |
| 2015 | Tami Nadu       | 4455 (4067-7279)        | 11 (10-18)                   | 78 (71-127)                      | 0 (0-0)                               | 877 (825-1770)                 | 2 (1-4)                             | 15 (9-31)                               | 0 (0-0)                                      | 51 (10-85)               | 0 (0-0)                       | 1 (0-2)                           | 0 (0-0)                                | 17 (3-20)          | 0 (0-0)                 | 0 (0-0)                     | 0 (0-0)                          |
| 2000 | Tripura         | 9794 (8943-10603)       |                              | 2948 (2692-4817)                 |                                       | 1927 (1154-3690)               |                                     | 880 (347-1171)                          |                                              | 61 (22-97)               |                               | 18 (7-29)                         |                                        | 21 (8-33)          |                         | 11 (2-10)                   |                                  |
| 2001 | Tripura         |                         |                              |                                  |                                       |                                |                                     |                                         |                                              | 65 (29-87)               |                               | 16 (6-26)                         |                                        | 19 (7-29)          |                         | 6 (0-9)                     |                                  |
| 2002 | Tripura         |                         |                              |                                  |                                       |                                |                                     |                                         |                                              | 51 (18-80)               |                               | 15 (6-23)                         |                                        | 17 (6-27)          |                         | 5 (0-8)                     |                                  |
| 2003 | Tripura         |                         |                              |                                  |                                       |                                |                                     |                                         |                                              | 47 (17-74)               |                               | 14 (6-21)                         |                                        | 16 (6-25)          |                         | 5 (0-7)                     |                                  |
| 2004 | Tripura         |                         |                              |                                  |                                       |                                |                                     |                                         |                                              | 43 (16-69)               |                               | 13 (6-20)                         |                                        | 15 (6-23)          |                         | 4 (0-7)                     |                                  |
| 2005 | Tripura         |                         |                              |                                  |                                       |                                |                                     |                                         |                                              | 41 (15-64)               |                               | 12 (4-18)                         |                                        | 14 (6-22)          |                         | 4 (0-6)                     |                                  |
| 2006 | Tripura         |                         |                              |                                  |                                       |                                |                                     |                                         |                                              | 39 (15-61)               |                               | 11 (4-17)                         |                                        | 13 (5-21)          |                         | 4 (0-6)                     |                                  |
| 2007 | Tripura         |                         |                              |                                  |                                       |                                |                                     |                                         |                                              | 38 (15-60)               |                               | 11 (4-17)                         |                                        | 13 (5-20)          |                         | 4 (0-6)                     |                                  |
| 2008 | Tripura         |                         |                              |                                  |                                       |                                |                                     |                                         |                                              | 38 (15-59)               |                               | 11 (4-16)                         |                                        | 13 (5-20)          |                         | 4 (0-6)                     |                                  |
| 2009 | Tripura         |                         |                              |                                  |                                       |                                |                                     |                                         |                                              | 38 (15-58)               |                               | 11 (4-16)                         |                                        | 13 (5-20)          |                         | 4 (0-6)                     |                                  |
| 2010 | Tripura         |                         |                              |                                  |                                       |                                |                                     |                                         |                                              | 38 (17-58)               |                               | 11 (5-16)                         |                                        | 13 (5-20)          |                         | 4 (0-6)                     |                                  |
| 2011 | Tripura         |                         |                              |                                  |                                       |                                |                                     |                                         |                                              | 40 (19-60)               |                               | 11 (5-17)                         |                                        | 14 (6-20)          |                         | 4 (0-6)                     |                                  |
| 2012 | Tripura         |                         |                              |                                  |                                       |                                |                                     |                                         |                                              | 41 (20-60)               |                               | 11 (6-17)                         |                                        | 14 (7-20)          |                         | 4 (0-6)                     |                                  |
| 2013 | Tripura         |                         |                              |                                  |                                       |                                |                                     |                                         |                                              | 42 (21-62)               |                               | 12 (6-17)                         |                                        | 14 (7-21)          |                         | 4 (0-6)                     |                                  |
| 2014 | Tripura         |                         |                              |                                  |                                       |                                |                                     |                                         |                                              | 42 (11-64)               |                               | 12 (3-18)                         |                                        | 14 (4-21)          |                         | 4 (0-6)                     |                                  |
| 2015 | Tripura         | 4809 (4391-10871)       | 12 (11-20)                   | 1346 (1239-2200)                 | 3 (0-6)                               | 946 (667-1913)                 | 2 (1-5)                             | 265 (159-536)                           | 1 (0-1)                                      | 28 (10-59)               | 0 (0-0)                       | 11 (3-17)                         | 0 (0-0)                                | 13 (2-20)          | 0 (0-0)                 | 4 (0-6)                     | 0 (0-0)                          |
| 2000 | Union Territory | 7041 (6429-11654)       |                              | 2532 (2312-4137)                 |                                       | 1386 (830-2788)                |                                     | 499 (299-1006)                          |                                              | 69 (27-105)              |                               | 25 (10-38)                        |                                        | 23 (8-35)          |                         | 8 (3-13)                    |                                  |
| 2001 | Union Territory |                         |                              |                                  |                                       |                                |                                     |                                         |                                              | 66 (26-102)              |                               | 24 (9-36)                         |                                        | 22 (8-34)          |                         | 8 (3-12)                    |                                  |
| 2002 | Union Territory |                         |                              |                                  |                                       |                                |                                     |                                         |                                              | 65 (26-100)              |                               | 23 (8-35)                         |                                        | 22 (8-34)          |                         | 8 (3-12)                    |                                  |
| 2003 | Union Territory |                         |                              |                                  |                                       |                                |                                     |                                         |                                              | 64 (21-101)              |                               | 22 (7-35)                         |                                        | 22 (7-34)          |                         | 8 (3-12)                    |                                  |
| 2004 | Union Territory |                         |                              |                                  |                                       |                                |                                     |                                         |                                              | 65 (21-102)              |                               | 22 (7-36)                         |                                        | 22 (7-35)          |                         | 8 (3-12)                    |                                  |
| 2005 | Union Territory |                         |                              |                                  |                                       |                                |                                     |                                         |                                              | 66 (22-104)              |                               | 23 (8-36)                         |                                        | 22 (7-35)          |                         | 8 (3-12)                    |                                  |
| 2006 | Union Territory |                         |                              |                                  |                                       |                                |                                     |                                         |                                              | 71 (26-108)              |                               | 24 (9-37)                         |                                        | 24 (8-37)          |                         | 9 (3-13)                    |                                  |
| 2007 | Union Territory |                         |                              |                                  |                                       |                                |                                     |                                         |                                              | 76 (30-110)              |                               | 26 (10-38)                        |                                        | 26 (10-37)         |                         | 9 (3-13)                    |                                  |
| 2008 | Union Territory |                         |                              |                                  |                                       |                                |                                     |                                         |                                              | 82 (35-124)              |                               | 28 (12-42)                        |                                        | 28 (12-42)         |                         | 9 (4-14)                    |                                  |
| 2009 | Union Territory |                         |                              |                                  |                                       |                                |                                     |                                         |                                              | 84 (38-133)              |                               | 28 (13-45)                        |                                        | 28 (13-45)         |                         | 9 (4-15)                    |                                  |
| 2010 | Union Territory |                         |                              |                                  |                                       |                                |                                     |                                         |                                              | 83 (38-135)              |                               | 28 (13-46)                        |                                        | 28 (13-45)         |                         | 9 (4-15)                    |                                  |
| 2011 | Union Territory |                         |                              |                                  |                                       |                                |                                     |                                         |                                              | 80 (35-128)              |                               | 27 (12-44)                        |                                        | 27 (12-44)         |                         | 9 (4-15)                    |                                  |
| 2012 | Union Territory |                         |                              |                                  |                                       |                                |                                     |                                         |                                              | 76 (32-122)              |                               | 26 (11-41)                        |                                        | 26 (11-41)         |                         | 9 (4-14)                    |                                  |
| 2013 | Union Territory |                         |                              |                                  |                                       |                                |                                     |                                         |                                              | 63 (29-101)              |                               | 21 (10-34)                        |                                        | 21 (10-34)         |                         | 7 (3-12)                    |                                  |
| 2014 | Union Territory |                         |                              |                                  |                                       |                                |                                     |                                         |                                              | 58 (26-90)               |                               | 19 (9-31)                         |                                        | 19 (9-30)          |                         | 6 (3-10)                    |                                  |
| 2015 | Union Territory | 1028 (607-1677)         | 3 (2-4)                      | 350 (320-472)                    | 1 (0-1)                               | 202 (121-408)                  | 1 (0-1)                             | 69 (41-139)                             | 0 (0-0)                                      | 67 (27-126)              | 0 (0-0)                       | 6 (2-9)                           | 0 (0-0)                                | 8 (2-9)            | 0 (0-0)                 | 2 (0-3)                     | 0 (0-0)                          |
| 2000 | Uttar Pradesh   | 903893 (825274-1478976) |                              | 3828 (3462-6248)                 |                                       | 178093 (106633-309498)         |                                     | 794 (451-1521)                          |                                              | 17774 (8200-26473)       |                               | 76 (61-112)                       |                                        | 3061 (1819-4896)   |                         | 13 (6-19)                   |                                  |
| 2001 | Uttar Pradesh   |                         |                              |                                  |                                       |                                |                                     |                                         |                                              | 17034 (7862-23970)       |                               | 72 (63-107)                       |                                        | 2933 (1584-3899)   |                         | 12 (6-18)                   |                                  |
| 2002 | Uttar Pradesh   |                         |                              |                                  |                                       |                                |                                     |                                         |                                              | 16096 (7650-24214)       |                               | 68 (60-102)                       |                                        | 2900 (1592-4170)   |                         | 12 (6-18)                   |                                  |
| 2003 | Uttar Pradesh   |                         |                              |                                  |                                       |                                |                                     |                                         |                                              | 15477 (7140-23042)       |                               | 65 (60-97)                        |                                        | 2665 (1520-3966)   |                         | 11 (5-17)                   |                                  |
| 2004 | Uttar Pradesh   |                         |                              |                                  |                                       |                                |                                     |                                         |                                              | 14638 (6740-21776)       |                               | 62 (59-92)                        |                                        | 2500 (1162-3790)   |                         | 11 (5-16)                   |                                  |
| 2005 | Uttar Pradesh   |                         |                              |                                  |                                       |                                |                                     |                                         |                                              | 13707 (6261-20456)       |                               | 58 (57-87)                        |                                        | 2360 (1078-3522)   |                         | 10 (5-15)                   |                                  |
| 2006 | Uttar Pradesh   |                         |                              |                                  |                                       |                                |                                     |                                         |                                              | 12826 (6002-19194)       |                               | 55 (52-82)                        |                                        | 2209 (999-3205)    |                         | 8 (4-14)                    |                                  |
| 2007 | Uttar Pradesh   |                         |                              |                                  |                                       |                                |                                     |                                         |                                              | 11916 (5341-17882)       |                               | 51 (52-79)                        |                                        | 2002 (900-3076)    |                         | 6 (4-13)                    |                                  |
| 2008 | Uttar Pradesh   |                         |                              |                                  |                                       |                                |                                     |                                         |                                              | 11155 (4997-16728)       |                               | 48 (21-72)                        |                                        | 1921 (860-2881)    |                         | 6 (4-12)                    |                                  |
| 2009 | Uttar Pradesh   |                         |                              |                                  |                                       |                                |                                     |                                         |                                              | 10030 (4744-15032)       |                               | 46 (20-68)                        |                                        | 1913 (812-2718)    |                         | 6 (4-12)                    |                                  |
| 2010 | Uttar Pradesh   |                         |                              |                                  |                                       |                                |                                     |                                         |                                              | 9961 (4408-14624)        |                               | 43 (19-65)                        |                                        | 1715 (768-2370)    |                         | 7 (3-11)                    |                                  |
| 2011 | Uttar Pradesh   |                         |                              |                                  |                                       |                                |                                     |                                         |                                              | 9471 (3938-14141)        |                               | 42 (17-64)                        |                                        | 1703 (828-2493)    |                         | 14 (6-22)                   |                                  |
| 2012 | Uttar Pradesh   |                         |                              |                                  |                                       |                                |                                     |                                         |                                              | 8866 (3885-13580)        |                               | 40 (16-61)                        |                                        | 1589 (1242-2078)   |                         | 13 (6-20)                   |                                  |
| 2013 | Uttar Pradesh   |                         |                              |                                  |                                       |                                |                                     |                                         |                                              | 8390 (3470-12787)        |                               | 38 (16-58)                        |                                        | 1513 (1170-2107)   |                         | 13 (5-19)                   |                                  |
| 2014 | Uttar Pradesh   |                         |                              |                                  |                                       |                                |                                     |                                         |                                              | 7782 (3236-11917)        |                               | 36 (16-50)                        |                                        | 1404 (1000-2017)   |                         | 12 (5-18)                   |                                  |
| 2015 | Uttar Pradesh   | 561834 (512966-11982)   | 14 (19-23)                   | 2600 (2374-4268)                 | 7 (6-11)                              | 110639 (66243-223003)          | 280 (167-664)                       | 512 (307-933)                           | 1 (1-3)                                      | 7319 (3936-11598)        | 20 (8-30)                     | 34 (14-52)                        | 0 (0-0)                                | 2485 (1624-3775)   | 7 (3-10)                | 11 (5-17)                   | 0 (0-0)                          |
| 2000 | Uttarakhand     | 40142 (36051-63069)     |                              | 3620 (3492-6248)                 |                                       | 7909 (4730-10964)              |                                     | 794 (451-1521)                          |                                              | 307 (182-560)            |                               | 38 (17-56)                        |                                        | 69 (31-102)        |                         | 7 (3-10)                    |                                  |
| 2001 | Uttarakhand     |                         |                              |                                  |                                       |                                |                                     |                                         |                                              | 384 (176-572)            |                               | 36 (17-54)                        |                                        | 66 (30-99)         |                         | 6 (0-9)                     |                                  |
| 2002 | Uttarakhand     |                         |                              |                                  |                                       |                                |                                     |                                         |                                              | 370 (170-551)            |                               | 35 (16-52)                        |                                        | 64 (28-95)         |                         | 6 (0-9)                     |                                  |
| 2003 | Uttarakhand     |                         |                              |                                  |                                       |                                |                                     |                                         |                                              | 356 (152-540)            |                               | 34 (14-51)                        |                                        | 120 (51-182)       |                         | 11 (5-17)                   |                                  |
| 2004 | Uttarakhand     |                         |                              |                                  |                                       |                                |                                     |                                         |                                              | 335 (143-507)            |                               | 32 (13-48)                        |                                        | 113 (48-171)       |                         | 11 (5-16)                   |                                  |
| 2005 | Uttarakhand     |                         |                              |                                  |                                       |                                |                                     |                                         |                                              | 308 (126-472)            |                               | 29 (12-45)                        |                                        | 101 (42-159)       |                         | 10 (4-15)                   |                                  |
| 2006 | Uttarakhand     |                         |                              |                                  |                                       |                                |                                     |                                         |                                              | 289 (110-435)            |                               | 27 (10-41)                        |                                        | 94 (37-147)        |                         | 9 (4-14)                    |                                  |
| 2007 | Uttarakhand     |                         |                              |                                  |                                       |                                |                                     |                                         |                                              | 253 (99-397)             |                               | 24 (9-38)                         |                                        | 65 (32-134)        |                         | 6 (0-13)                    |                                  |
| 2008 | Uttarakhand     |                         |                              |                                  |                                       |                                |                                     |                                         |                                              | 232 (88-363)             |                               | 22 (8-35)                         |                                        | 78 (30-122)        |                         | 7 (3-11)                    |                                  |
| 2009 | Uttarakhand     |                         |                              |                                  |                                       |                                |                                     |                                         |                                              | 213 (81-334)             |                               | 20 (8-32)                         |                                        | 72 (27-113)        |                         | 7 (3-11)                    |                                  |
| 2010 | Uttarakhand     |                         |                              |                                  |                                       |                                |                                     |                                         |                                              | 196 (74-307)             |                               | 19 (7-30)                         |                                        | 66 (25-103)        |                         | 6 (2-10)                    |                                  |
| 2011 | Uttarakhand     |                         |                              |                                  |                                       |                                |                                     |                                         |                                              | 178 (68-279)             |                               | 17 (7-27)                         |                                        | 60 (23-84)         |                         | 6 (0-9)                     |                                  |
| 2012 | Uttarakhand     |                         |                              |                                  |                                       |                                |                                     |                                         |                                              | 168 (60-248)             |                               | 16 (6-24)                         |                                        | 63 (24-83)         |                         | 5 (0-8)                     |                                  |
| 2013 | Uttarakhand     |                         |                              |                                  |                                       |                                |                                     |                                         |                                              | 141 (53-220)             |                               | 14 (5-22)                         |                                        | 47 (18-74)         |                         | 5 (0-7)                     |                                  |
| 2014 | Uttarakhand     |                         |                              |                                  |                                       |                                |                                     |                                         |                                              | 123 (47-193)             |                               | 12 (5-19)                         |                                        | 42 (16-65)         |                         | 4 (0-7)                     |                                  |
| 2015 | Uttarakhand     | 2622 (2394-4284)        | 7 (6-11)                     | 265 (234-433)                    | 1 (1-1)                               | 517 (309-1043)                 | 1 (1-3)                             | 52 (31-105)                             | 0 (0-0)                                      | 15 (7-28)                | 0 (0-0)                       | 2 (1-3)                           | 0 (0-0)                                | 6 (2-10)           | 0 (0-0)                 | 1 (0-1)                     | 0 (0-0)                          |
| 2000 | West Bengal     | 277643 (253494-433642)  |                              | 3190 (2912-5212)                 |                                       | 54870 (32734-110445)           |                                     | 628 (376-1268)                          |                                              | 3431 (1803-5142)         |                               | 39 (17-60)                        |                                        | 1157 (607-1747)    |                         | 13 (6-20)                   |                                  |
| 2001 | West Bengal     |                         |                              |                                  |                                       |                                |                                     |                                         |                                              | 3134 (1374-4734)         |                               | 36 (16-54)                        |                                        | 1097 (463-1596)    |                         | 12 (5-18)                   |                                  |
| 2002 | West Bengal     |                         |                              |                                  |                                       |                                |                                     |                                         |                                              | 2823 (1237-4265)         |                               | 32 (14-46)                        |                                        | 952 (417-1438)     |                         | 11 (5-17)                   |                                  |
| 2003 | West Bengal     |                         |                              |                                  |                                       |                                |                                     |                                         |                                              | 2606 (1120-3861)         |                               | 29 (13-44)                        |                                        | 881 (377-1301)     |                         | 10 (4-15)                   |                                  |
| 2004 | West Bengal     |                         |                              |                                  |                                       |                                |                                     |                                         |                                              | 2335 (1023-3528)         |                               | 27 (12-41)                        |                                        | 787 (345-1189)     |                         | 9 (4-14)                    |                                  |
| 2005 | West Bengal     |                         |                              |                                  |                                       |                                |                                     |                                         |                                              | 2140 (94                 |                               |                                   |                                        |                    |                         |                             |                                  |

**Webappendix 13: Pneumococcal pneumonia mortality sensitivity results in India by state and year**

| Year | State             | Base case      |                   |                   | VT AOM vaccine efficacy adjustment |                   |                   | VT pneumococcal pneumonia efficacy adjustment (from Dutch elderly trial) |                   |                   |
|------|-------------------|----------------|-------------------|-------------------|------------------------------------|-------------------|-------------------|--------------------------------------------------------------------------|-------------------|-------------------|
|      |                   | Spn pna deaths | Spn pna deaths_lb | Spn pna deaths_ub | Spn pna deaths                     | Spn pna deaths_lb | Spn pna deaths_ub | Spn pna deaths                                                           | Spn pna deaths_lb | Spn pna deaths_ub |
| 2000 | Andhra Pradesh    | 6780           | 4582              | 7980              | 9542                               | 6250              | 10951             | 10786                                                                    | 6562              | 11553             |
| 2001 | Andhra Pradesh    | 7093           | 4645              | 8751              | 9782                               | 6269              | 11644             | 10503                                                                    | 6390              | 11249             |
| 2002 | Andhra Pradesh    | 6849           | 4487              | 8454              | 9447                               | 6056              | 11249             | 10147                                                                    | 6173              | 10868             |
| 2003 | Andhra Pradesh    | 6562           | 4300              | 8102              | 9052                               | 5804              | 10781             | 9725                                                                     | 5916              | 10415             |
| 2004 | Andhra Pradesh    | 6237           | 4089              | 7704              | 8604                               | 5518              | 10251             | 9246                                                                     | 5625              | 9903              |
| 2005 | Andhra Pradesh    | 5891           | 3861              | 7280              | 8128                               | 5212              | 9686              | 8736                                                                     | 5314              | 9356              |
| 2006 | Andhra Pradesh    | 5540           | 3629              | 6848              | 7644                               | 4900              | 9111              | 8216                                                                     | 4998              | 8800              |
| 2007 | Andhra Pradesh    | 5163           | 3383              | 6387              | 7125                               | 4567              | 8497              | 7661                                                                     | 4661              | 8205              |
| 2008 | Andhra Pradesh    | 4785           | 3137              | 5923              | 6604                               | 4235              | 7880              | 7105                                                                     | 4322              | 7609              |
| 2009 | Andhra Pradesh    | 4380           | 2860              | 5439              | 6047                               | 3867              | 7232              | 6511                                                                     | 3961              | 6973              |
| 2010 | Andhra Pradesh    | 3965           | 2580              | 4939              | 5476                               | 3493              | 6564              | 5901                                                                     | 3590              | 6320              |
| 2011 | Andhra Pradesh    | 3559           | 2309              | 4447              | 4917                               | 3129              | 5908              | 5303                                                                     | 3226              | 5680              |
| 2012 | Andhra Pradesh    | 3140           | 2030              | 3934              | 4339                               | 2754              | 5224              | 4683                                                                     | 2849              | 5016              |
| 2013 | Andhra Pradesh    | 2800           | 1812              | 3511              | 3870                               | 2458              | 4662              | 4179                                                                     | 2542              | 4476              |
| 2014 | Andhra Pradesh    | 2513           | 1626              | 3151              | 3473                               | 2206              | 4184              | 3751                                                                     | 2282              | 4017              |
| 2015 | Andhra Pradesh    | 2337           | 1513              | 2932              | 3231                               | 2052              | 3893              | 3490                                                                     | 2123              | 3738              |
| 2000 | Arunachal Pradesh | 99             | 63                | 128               | 138                                | 86                | 169               | 150                                                                      | 91                | 161               |
| 2001 | Arunachal Pradesh | 93             | 59                | 120               | 129                                | 81                | 159               | 141                                                                      | 86                | 151               |
| 2002 | Arunachal Pradesh | 93             | 59                | 119               | 128                                | 80                | 158               | 140                                                                      | 85                | 150               |
| 2003 | Arunachal Pradesh | 94             | 59                | 121               | 130                                | 81                | 160               | 142                                                                      | 86                | 152               |
| 2004 | Arunachal Pradesh | 93             | 59                | 120               | 130                                | 81                | 159               | 141                                                                      | 86                | 151               |
| 2005 | Arunachal Pradesh | 92             | 59                | 118               | 128                                | 80                | 156               | 139                                                                      | 84                | 149               |
| 2006 | Arunachal Pradesh | 97             | 63                | 122               | 134                                | 85                | 161               | 145                                                                      | 88                | 155               |
| 2007 | Arunachal Pradesh | 92             | 61                | 114               | 127                                | 82                | 152               | 137                                                                      | 83                | 147               |
| 2008 | Arunachal Pradesh | 93             | 61                | 115               | 128                                | 83                | 153               | 138                                                                      | 84                | 148               |
| 2009 | Arunachal Pradesh | 93             | 60                | 117               | 129                                | 82                | 155               | 139                                                                      | 85                | 149               |
| 2010 | Arunachal Pradesh | 92             | 59                | 116               | 127                                | 80                | 154               | 138                                                                      | 84                | 148               |
| 2011 | Arunachal Pradesh | 88             | 56                | 113               | 122                                | 77                | 150               | 133                                                                      | 81                | 142               |
| 2012 | Arunachal Pradesh | 84             | 53                | 109               | 117                                | 73                | 144               | 127                                                                      | 77                | 136               |
| 2013 | Arunachal Pradesh | 81             | 51                | 104               | 112                                | 70                | 138               | 122                                                                      | 74                | 131               |

Spn = *Streptococcus pneumoniae* ; pna = pneumonia; hiv = HIV-infected deaths only; lb = lower bound; ub = upper bound

**Spn pneumonia mortality sensitivity results in India by state and year**

| Year | State             | Spn pna |           |           | Spn pna |           |           | Spn pna |           |           |
|------|-------------------|---------|-----------|-----------|---------|-----------|-----------|---------|-----------|-----------|
|      |                   | deaths  | deaths_lb | deaths_ub | deaths  | deaths_lb | deaths_ub | deaths  | deaths_lb | deaths_ub |
| 2014 | Arunachal Pradesh | 77      | 49        | 100       | 107     | 67        | 132       | 116     | 71        | 125       |
| 2015 | Arunachal Pradesh | 72      | 46        | 93        | 100     | 63        | 124       | 109     | 67        | 117       |
| 2000 | Assam             | 5014    | 3325      | 6050      | 7078    | 4571      | 8270      | 8061    | 4904      | 8634      |
| 2001 | Assam             | 4843    | 3211      | 5843      | 6837    | 4415      | 7988      | 7786    | 4737      | 8339      |
| 2002 | Assam             | 4709    | 3122      | 5681      | 6647    | 4292      | 7766      | 7570    | 4605      | 8108      |
| 2003 | Assam             | 4616    | 3060      | 5569      | 6516    | 4207      | 7612      | 7420    | 4514      | 7947      |
| 2004 | Assam             | 4547    | 3013      | 5484      | 6418    | 4143      | 7496      | 7307    | 4445      | 7826      |
| 2005 | Assam             | 4489    | 2979      | 5407      | 6336    | 4094      | 7394      | 7212    | 4387      | 7724      |
| 2006 | Assam             | 4432    | 2945      | 5330      | 6254    | 4045      | 7290      | 7115    | 4329      | 7621      |
| 2007 | Assam             | 4399    | 2928      | 5283      | 6207    | 4019      | 7228      | 7060    | 4295      | 7561      |
| 2008 | Assam             | 4376    | 2911      | 5254      | 6173    | 3997      | 7187      | 7020    | 4271      | 7519      |
| 2009 | Assam             | 4318    | 2873      | 5185      | 6092    | 3944      | 7093      | 6928    | 4215      | 7420      |
| 2010 | Assam             | 4280    | 2847      | 5138      | 6038    | 3908      | 7029      | 6865    | 4177      | 7353      |
| 2011 | Assam             | 4242    | 2822      | 5092      | 5984    | 3874      | 6966      | 6804    | 4139      | 7288      |
| 2012 | Assam             | 4173    | 2776      | 5010      | 5887    | 3811      | 6854      | 6695    | 4073      | 7170      |
| 2013 | Assam             | 4164    | 2771      | 5001      | 5875    | 3804      | 6841      | 6682    | 4065      | 7157      |
| 2014 | Assam             | 4117    | 2740      | 4945      | 5809    | 3762      | 6765      | 6608    | 4020      | 7077      |
| 2015 | Assam             | 4359    | 2784      | 5532      | 6032    | 3793      | 7331      | 6532    | 3974      | 6996      |
| 2000 | Bihar             | 18419   | 12431     | 21620     | 25905   | 16951     | 29672     | 29235   | 17786     | 31312     |
| 2001 | Bihar             | 17945   | 12111     | 21063     | 25239   | 16515     | 28908     | 28483   | 17328     | 30506     |
| 2002 | Bihar             | 17382   | 11732     | 20403     | 24447   | 15997     | 28002     | 27590   | 16785     | 29550     |
| 2003 | Bihar             | 16778   | 11328     | 19701     | 23600   | 15446     | 27038     | 26640   | 16207     | 28532     |
| 2004 | Bihar             | 16138   | 10903     | 18961     | 22704   | 14867     | 26023     | 25640   | 15598     | 27462     |
| 2005 | Bihar             | 15504   | 10468     | 18245     | 21818   | 14280     | 25036     | 24656   | 15000     | 26407     |
| 2006 | Bihar             | 15990   | 10441     | 19762     | 22055   | 14103     | 26286     | 23687   | 14410     | 25370     |
| 2007 | Bihar             | 15318   | 9992      | 18974     | 21136   | 13505     | 25232     | 22722   | 13823     | 24336     |
| 2008 | Bihar             | 14627   | 9550      | 18134     | 20188   | 12908     | 24116     | 21717   | 13211     | 23259     |
| 2009 | Bihar             | 13856   | 9051      | 17186     | 19126   | 12233     | 22854     | 20581   | 12520     | 22042     |
| 2010 | Bihar             | 13082   | 8546      | 16227     | 18058   | 11550     | 21580     | 19433   | 11822     | 20813     |
| 2011 | Bihar             | 12263   | 8011      | 15211     | 16928   | 10827     | 20228     | 18216   | 11082     | 19510     |
| 2012 | Bihar             | 11290   | 7375      | 14005     | 15585   | 9968      | 18624     | 16771   | 10203     | 17962     |
| 2013 | Bihar             | 10431   | 6814      | 12939     | 14399   | 9210      | 17207     | 15495   | 9426      | 16595     |

Spn = *Streptococcus pneumoniae* ; pna = pneumonia; hiv = HIV-infected deaths only; lb = lower bound; ub = upper bound

**Spn pneumonia mortality sensitivity results in India by state and year**

| Year | State        | Spn pna deaths | Spn pna deaths_lb | Spn pna deaths_ub | Spn pna deaths | Spn pna deaths_lb | Spn pna deaths_ub | Spn pna deaths | Spn pna deaths_lb | Spn pna deaths_ub |
|------|--------------|----------------|-------------------|-------------------|----------------|-------------------|-------------------|----------------|-------------------|-------------------|
| 2014 | Bihar        | 9479           | 6192              | 11758             | 13085          | 8369              | 15636             | 14081          | 8566              | 15081             |
| 2015 | Bihar        | 8606           | 5622              | 10675             | 11880          | 7598              | 14196             | 12784          | 7777              | 13692             |
| 2000 | Chhattisgarh | 3406           | 2261              | 4101              | 4807           | 3107              | 5608              | 5471           | 3328              | 5860              |
| 2001 | Chhattisgarh | 3374           | 2240              | 4063              | 4762           | 3078              | 5556              | 5420           | 3297              | 5805              |
| 2002 | Chhattisgarh | 3277           | 2175              | 3946              | 4625           | 2989              | 5395              | 5263           | 3202              | 5637              |
| 2003 | Chhattisgarh | 3164           | 2100              | 3809              | 4465           | 2885              | 5208              | 5080           | 3091              | 5441              |
| 2004 | Chhattisgarh | 2990           | 1983              | 3597              | 4219           | 2725              | 4919              | 4798           | 2919              | 5139              |
| 2005 | Chhattisgarh | 2835           | 1888              | 3399              | 4000           | 2591              | 4652              | 4546           | 2766              | 4869              |
| 2006 | Chhattisgarh | 2746           | 1837              | 3281              | 3873           | 2517              | 4493              | 4400           | 2677              | 4712              |
| 2007 | Chhattisgarh | 2738           | 1775              | 3430              | 3784           | 2407              | 4556              | 4086           | 2486              | 4377              |
| 2008 | Chhattisgarh | 2597           | 1683              | 3252              | 3589           | 2282              | 4319              | 3875           | 2357              | 4150              |
| 2009 | Chhattisgarh | 2414           | 1565              | 3023              | 3336           | 2121              | 4015              | 3602           | 2191              | 3857              |
| 2010 | Chhattisgarh | 2220           | 1439              | 2780              | 3069           | 1951              | 3693              | 3313           | 2015              | 3548              |
| 2011 | Chhattisgarh | 2078           | 1347              | 2602              | 2872           | 1826              | 3456              | 3100           | 1886              | 3320              |
| 2012 | Chhattisgarh | 1924           | 1247              | 2409              | 2659           | 1691              | 3200              | 2871           | 1746              | 3074              |
| 2013 | Chhattisgarh | 1851           | 1199              | 2317              | 2558           | 1626              | 3078              | 2761           | 1680              | 2957              |
| 2014 | Chhattisgarh | 1831           | 1186              | 2292              | 2530           | 1609              | 3045              | 2731           | 1661              | 2925              |
| 2015 | Chhattisgarh | 1881           | 1219              | 2356              | 2600           | 1653              | 3129              | 2807           | 1708              | 3006              |
| 2000 | Delhi        | 1061           | 683               | 1338              | 1467           | 929               | 1775              | 1587           | 966               | 1700              |
| 2001 | Delhi        | 1020           | 657               | 1286              | 1410           | 893               | 1706              | 1526           | 928               | 1634              |
| 2002 | Delhi        | 975            | 628               | 1229              | 1348           | 853               | 1631              | 1458           | 887               | 1562              |
| 2003 | Delhi        | 928            | 597               | 1169              | 1283           | 812               | 1551              | 1387           | 844               | 1486              |
| 2004 | Delhi        | 879            | 565               | 1105              | 1215           | 768               | 1467              | 1312           | 798               | 1405              |
| 2005 | Delhi        | 831            | 541               | 1035              | 1148           | 732               | 1375              | 1236           | 752               | 1324              |
| 2006 | Delhi        | 784            | 518               | 964               | 1082           | 697               | 1284              | 1161           | 706               | 1244              |
| 2007 | Delhi        | 736            | 495               | 893               | 1013           | 663               | 1191              | 1084           | 659               | 1161              |
| 2008 | Delhi        | 687            | 460               | 830               | 945            | 616               | 1108              | 1008           | 613               | 1080              |
| 2009 | Delhi        | 635            | 424               | 766               | 873            | 568               | 1022              | 930            | 565               | 996               |
| 2010 | Delhi        | 582            | 388               | 701               | 800            | 520               | 935               | 851            | 518               | 911               |
| 2011 | Delhi        | 529            | 352               | 635               | 726            | 471               | 847               | 771            | 469               | 826               |
| 2012 | Delhi        | 470            | 309               | 600               | 645            | 415               | 788               | 683            | 416               | 732               |
| 2013 | Delhi        | 416            | 273               | 529               | 570            | 366               | 695               | 602            | 366               | 645               |

Spn = *Streptococcus pneumoniae* ; pna = pneumonia; hiv = HIV-infected deaths only; lb = lower bound; ub = upper bound

**Spn pneumonia mortality sensitivity results in India by state and year**

| Year | State   | Spn pna deaths | Spn pna deaths_lb | Spn pna deaths_ub | Spn pna deaths | Spn pna deaths_lb | Spn pna deaths_ub | Spn pna deaths | Spn pna deaths_lb | Spn pna deaths_ub |
|------|---------|----------------|-------------------|-------------------|----------------|-------------------|-------------------|----------------|-------------------|-------------------|
| 2014 | Delhi   | 357            | 234               | 453               | 489            | 313               | 595               | 516            | 314               | 553               |
| 2015 | Delhi   | 303            | 198               | 385               | 415            | 266               | 505               | 438            | 266               | 469               |
| 2000 | Goa     | 23             | 15                | 29                | 31             | 20                | 39                | 33             | 20                | 36                |
| 2001 | Goa     | 19             | 12                | 25                | 26             | 17                | 32                | 28             | 17                | 30                |
| 2002 | Goa     | 13             | 9                 | 17                | 18             | 12                | 23                | 19             | 12                | 21                |
| 2003 | Goa     | 17             | 11                | 22                | 23             | 15                | 28                | 24             | 15                | 26                |
| 2004 | Goa     | 17             | 11                | 22                | 24             | 15                | 29                | 25             | 15                | 27                |
| 2005 | Goa     | 18             | 11                | 23                | 24             | 15                | 30                | 26             | 16                | 28                |
| 2006 | Goa     | 16             | 10                | 20                | 21             | 14                | 27                | 23             | 14                | 25                |
| 2007 | Goa     | 11             | 7                 | 14                | 15             | 9                 | 18                | 16             | 10                | 17                |
| 2008 | Goa     | 9              | 6                 | 12                | 13             | 8                 | 16                | 13             | 8                 | 14                |
| 2009 | Goa     | 10             | 7                 | 14                | 14             | 9                 | 18                | 15             | 9                 | 16                |
| 2010 | Goa     | 10             | 7                 | 13                | 14             | 9                 | 18                | 15             | 9                 | 16                |
| 2011 | Goa     | 8              | 5                 | 10                | 11             | 7                 | 13                | 12             | 7                 | 12                |
| 2012 | Goa     | 6              | 4                 | 7                 | 8              | 5                 | 10                | 9              | 5                 | 9                 |
| 2013 | Goa     | 4              | 3                 | 5                 | 6              | 4                 | 7                 | 6              | 4                 | 7                 |
| 2014 | Goa     | 3              | 2                 | 4                 | 4              | 3                 | 5                 | 5              | 3                 | 5                 |
| 2015 | Goa     | 2              | 1                 | 3                 | 3              | 2                 | 4                 | 3              | 2                 | 4                 |
| 2000 | Gujarat | 6676           | 4438              | 8027              | 9421           | 6095              | 10980             | 10718          | 6521              | 11480             |
| 2001 | Gujarat | 6355           | 4226              | 7644              | 8969           | 5804              | 10455             | 10207          | 6209              | 10932             |
| 2002 | Gujarat | 6050           | 4024              | 7279              | 8539           | 5527              | 9956              | 9719           | 5913              | 10410             |
| 2003 | Gujarat | 6108           | 3894              | 7764              | 8453           | 5310              | 10287             | 9158           | 5572              | 9809              |
| 2004 | Gujarat | 5653           | 3602              | 7182              | 7822           | 4912              | 9515              | 8472           | 5154              | 9073              |
| 2005 | Gujarat | 5382           | 3459              | 6793              | 7444           | 4704              | 9011              | 8053           | 4899              | 8624              |
| 2006 | Gujarat | 5172           | 3356              | 6479              | 7149           | 4550              | 8606              | 7721           | 4697              | 8270              |
| 2007 | Gujarat | 4854           | 3185              | 6030              | 6705           | 4303              | 8021              | 7228           | 4397              | 7741              |
| 2008 | Gujarat | 4560           | 2987              | 5655              | 6296           | 4035              | 7522              | 6778           | 4123              | 7259              |
| 2009 | Gujarat | 4235           | 2771              | 5246              | 5845           | 3743              | 6978              | 6288           | 3825              | 6734              |
| 2010 | Gujarat | 3908           | 2556              | 4839              | 5393           | 3453              | 6437              | 5800           | 3528              | 6212              |
| 2011 | Gujarat | 3634           | 2377              | 4500              | 5015           | 3211              | 5985              | 5393           | 3281              | 5776              |
| 2012 | Gujarat | 3384           | 2214              | 4191              | 4671           | 2990              | 5575              | 5023           | 3056              | 5380              |
| 2013 | Gujarat | 3228           | 2111              | 3997              | 4455           | 2852              | 5317              | 4791           | 2915              | 5131              |

Spn = *Streptococcus pneumoniae* ; pna = pneumonia; hiv = HIV-infected deaths only; lb = lower bound; ub = upper bound

**Spn pneumonia mortality sensitivity results in India by state and year**

| Year | State            | Spn pna deaths | Spn pna deaths_lb | Spn pna deaths_ub | Spn pna deaths | Spn pna deaths_lb | Spn pna deaths_ub | Spn pna deaths | Spn pna deaths_lb | Spn pna deaths_ub |
|------|------------------|----------------|-------------------|-------------------|----------------|-------------------|-------------------|----------------|-------------------|-------------------|
| 2014 | Gujarat          | 3071           | 2009              | 3804              | 4239           | 2714              | 5059              | 4559           | 2773              | 4883              |
| 2015 | Gujarat          | 2919           | 1910              | 3615              | 4029           | 2580              | 4809              | 4333           | 2636              | 4641              |
| 2000 | Haryana          | 3729           | 2508              | 4401              | 5249           | 3426              | 6036              | 5936           | 3611              | 6357              |
| 2001 | Haryana          | 3541           | 2382              | 4180              | 4984           | 3253              | 5732              | 5637           | 3429              | 6037              |
| 2002 | Haryana          | 3336           | 2245              | 3939              | 4696           | 3066              | 5402              | 5312           | 3232              | 5689              |
| 2003 | Haryana          | 3119           | 2099              | 3683              | 4391           | 2867              | 5051              | 4966           | 3021              | 5319              |
| 2004 | Haryana          | 3106           | 2017              | 3845              | 4283           | 2728              | 5112              | 4599           | 2798              | 4926              |
| 2005 | Haryana          | 2820           | 1848              | 3472              | 3888           | 2493              | 4620              | 4170           | 2537              | 4467              |
| 2006 | Haryana          | 2525           | 1671              | 3087              | 3479           | 2247              | 4114              | 3725           | 2266              | 3990              |
| 2007 | Haryana          | 2398           | 1605              | 2911              | 3302           | 2151              | 3884              | 3530           | 2147              | 3781              |
| 2008 | Haryana          | 2210           | 1477              | 2679              | 3042           | 1979              | 3574              | 3249           | 1976              | 3479              |
| 2009 | Haryana          | 1962           | 1307              | 2379              | 2700           | 1752              | 3173              | 2882           | 1753              | 3087              |
| 2010 | Haryana          | 1899           | 1262              | 2306              | 2613           | 1693              | 3075              | 2791           | 1698              | 2989              |
| 2011 | Haryana          | 1789           | 1187              | 2177              | 2463           | 1594              | 2902              | 2632           | 1601              | 2819              |
| 2012 | Haryana          | 1572           | 1041              | 1916              | 2165           | 1399              | 2553              | 2314           | 1408              | 2478              |
| 2013 | Haryana          | 1595           | 1057              | 1944              | 2197           | 1420              | 2591              | 2349           | 1429              | 2516              |
| 2014 | Haryana          | 1562           | 1035              | 1904              | 2151           | 1391              | 2538              | 2301           | 1400              | 2464              |
| 2015 | Haryana          | 1580           | 1047              | 1926              | 2175           | 1406              | 2567              | 2327           | 1415              | 2492              |
| 2000 | Himachal Pradesh | 702            | 458               | 872               | 970            | 620               | 1160              | 1044           | 635               | 1118              |
| 2001 | Himachal Pradesh | 650            | 424               | 807               | 897            | 573               | 1073              | 965            | 587               | 1034              |
| 2002 | Himachal Pradesh | 600            | 391               | 744               | 828            | 529               | 990               | 891            | 542               | 954               |
| 2003 | Himachal Pradesh | 554            | 361               | 687               | 765            | 488               | 914               | 823            | 501               | 881               |
| 2004 | Himachal Pradesh | 512            | 334               | 635               | 706            | 451               | 844               | 760            | 462               | 814               |
| 2005 | Himachal Pradesh | 473            | 310               | 584               | 652            | 418               | 777               | 701            | 426               | 751               |
| 2006 | Himachal Pradesh | 437            | 287               | 538               | 602            | 387               | 716               | 646            | 393               | 692               |
| 2007 | Himachal Pradesh | 403            | 266               | 494               | 555            | 358               | 658               | 595            | 362               | 638               |
| 2008 | Himachal Pradesh | 372            | 246               | 455               | 513            | 330               | 607               | 549            | 334               | 588               |
| 2009 | Himachal Pradesh | 343            | 228               | 417               | 472            | 305               | 556               | 504            | 307               | 540               |
| 2010 | Himachal Pradesh | 316            | 211               | 382               | 435            | 283               | 510               | 463            | 282               | 496               |
| 2011 | Himachal Pradesh | 293            | 197               | 352               | 403            | 264               | 470               | 428            | 261               | 459               |
| 2012 | Himachal Pradesh | 272            | 182               | 325               | 374            | 244               | 434               | 397            | 241               | 425               |
| 2013 | Himachal Pradesh | 261            | 175               | 311               | 358            | 233               | 415               | 380            | 231               | 407               |

Spn = *Streptococcus pneumoniae* ; pna = pneumonia; hiv = HIV-infected deaths only; lb = lower bound; ub = upper bound

**Spn pneumonia mortality sensitivity results in India by state and year**

| Year | State            | Spn pna deaths | Spn pna deaths_lb | Spn pna deaths_ub | Spn pna deaths | Spn pna deaths_lb | Spn pna deaths_ub | Spn pna deaths | Spn pna deaths_lb | Spn pna deaths_ub |
|------|------------------|----------------|-------------------|-------------------|----------------|-------------------|-------------------|----------------|-------------------|-------------------|
| 2014 | Himachal Pradesh | 255            | 170               | 303               | 350            | 228               | 405               | 370            | 225               | 397               |
| 2015 | Himachal Pradesh | 257            | 172               | 305               | 353            | 229               | 408               | 373            | 227               | 400               |
| 2000 | Jammu & Kashmir  | 858            | 569               | 1011              | 1176           | 760               | 1353              | 1240           | 754               | 1328              |
| 2001 | Jammu & Kashmir  | 807            | 535               | 951               | 1106           | 715               | 1272              | 1166           | 709               | 1249              |
| 2002 | Jammu & Kashmir  | 758            | 503               | 894               | 1039           | 672               | 1196              | 1096           | 667               | 1174              |
| 2003 | Jammu & Kashmir  | 712            | 473               | 842               | 977            | 633               | 1126              | 1032           | 628               | 1105              |
| 2004 | Jammu & Kashmir  | 669            | 446               | 792               | 917            | 596               | 1060              | 971            | 591               | 1040              |
| 2005 | Jammu & Kashmir  | 626            | 421               | 750               | 860            | 562               | 1001              | 914            | 556               | 978               |
| 2006 | Jammu & Kashmir  | 585            | 390               | 708               | 805            | 522               | 944               | 858            | 522               | 919               |
| 2007 | Jammu & Kashmir  | 546            | 359               | 666               | 751            | 483               | 887               | 803            | 488               | 860               |
| 2008 | Jammu & Kashmir  | 508            | 335               | 621               | 700            | 451               | 827               | 749            | 455               | 802               |
| 2009 | Jammu & Kashmir  | 469            | 309               | 573               | 646            | 416               | 764               | 691            | 421               | 740               |
| 2010 | Jammu & Kashmir  | 428            | 283               | 524               | 590            | 381               | 698               | 632            | 385               | 677               |
| 2011 | Jammu & Kashmir  | 387            | 256               | 474               | 534            | 344               | 632               | 572            | 348               | 612               |
| 2012 | Jammu & Kashmir  | 344            | 227               | 421               | 474            | 305               | 560               | 507            | 309               | 543               |
| 2013 | Jammu & Kashmir  | 309            | 204               | 378               | 425            | 274               | 503               | 456            | 277               | 488               |
| 2014 | Jammu & Kashmir  | 281            | 185               | 344               | 387            | 249               | 458               | 414            | 252               | 444               |
| 2015 | Jammu & Kashmir  | 267            | 176               | 326               | 368            | 237               | 435               | 394            | 239               | 422               |
| 2000 | Jharkhand        | 3690           | 2446              | 4470              | 5213           | 3365              | 6108              | 5947           | 3618              | 6369              |
| 2001 | Jharkhand        | 3884           | 2463              | 4984              | 5382           | 3368              | 6596              | 5850           | 3559              | 6266              |
| 2002 | Jharkhand        | 3768           | 2390              | 4837              | 5221           | 3268              | 6400              | 5677           | 3454              | 6080              |
| 2003 | Jharkhand        | 3697           | 2346              | 4747              | 5124           | 3207              | 6282              | 5571           | 3389              | 5967              |
| 2004 | Jharkhand        | 3470           | 2202              | 4456              | 4809           | 3010              | 5896              | 5230           | 3181              | 5601              |
| 2005 | Jharkhand        | 3147           | 2000              | 4037              | 4362           | 2733              | 5343              | 4742           | 2885              | 5079              |
| 2006 | Jharkhand        | 3107           | 1976              | 3981              | 4305           | 2700              | 5270              | 4679           | 2847              | 5012              |
| 2007 | Jharkhand        | 2879           | 1833              | 3684              | 3988           | 2504              | 4878              | 4334           | 2637              | 4642              |
| 2008 | Jharkhand        | 2574           | 1639              | 3294              | 3566           | 2238              | 4361              | 3875           | 2357              | 4150              |
| 2009 | Jharkhand        | 2282           | 1453              | 2921              | 3162           | 1985              | 3867              | 3436           | 2090              | 3680              |
| 2010 | Jharkhand        | 2307           | 1469              | 2952              | 3197           | 2006              | 3909              | 3473           | 2113              | 3720              |
| 2011 | Jharkhand        | 2203           | 1403              | 2819              | 3052           | 1915              | 3732              | 3316           | 2017              | 3552              |
| 2012 | Jharkhand        | 2049           | 1304              | 2621              | 2838           | 1781              | 3470              | 3084           | 1876              | 3303              |
| 2013 | Jharkhand        | 1869           | 1190              | 2391              | 2589           | 1625              | 3166              | 2813           | 1711              | 3013              |

Spn = *Streptococcus pneumoniae*; pna = pneumonia; hiv = HIV-infected deaths only; lb = lower bound; ub = upper bound



### Spn pneumonia mortality sensitivity results in India by state and year

| Year | State     | Spn pna deaths | Spn pna deaths_lb | Spn pna deaths_ub | Spn pna deaths | Spn pna deaths_lb | Spn pna deaths_ub | Spn pna deaths | Spn pna deaths_lb | Spn pna deaths_ub |
|------|-----------|----------------|-------------------|-------------------|----------------|-------------------|-------------------|----------------|-------------------|-------------------|
| 2014 | Jharkhand | 1679           | 1069              | 2149              | 2327           | 1460              | 2845              | 2528           | 1538              | 2707              |
| 2015 | Jharkhand | 1492           | 950               | 1909              | 2067           | 1297              | 2528              | 2246           | 1366              | 2406              |
| 2000 | Karnataka | 5330           | 3449              | 6687              | 7368           | 4680              | 8879              | 7959           | 4842              | 8524              |
| 2001 | Karnataka | 5088           | 3293              | 6383              | 7033           | 4467              | 8476              | 7597           | 4622              | 8137              |
| 2002 | Karnataka | 4942           | 3197              | 6199              | 6831           | 4338              | 8230              | 7377           | 4488              | 7901              |
| 2003 | Karnataka | 4803           | 3106              | 6022              | 6639           | 4215              | 7997              | 7168           | 4360              | 7677              |
| 2004 | Karnataka | 4652           | 3006              | 5828              | 6428           | 4078              | 7738              | 6936           | 4220              | 7429              |
| 2005 | Karnataka | 4473           | 2905              | 5580              | 6178           | 3935              | 7415              | 6660           | 4052              | 7133              |
| 2006 | Karnataka | 4278           | 2794              | 5313              | 5907           | 3777              | 7065              | 6360           | 3869              | 6812              |
| 2007 | Karnataka | 4039           | 2653              | 4992              | 5574           | 3580              | 6643              | 5994           | 3646              | 6419              |
| 2008 | Karnataka | 3779           | 2477              | 4661              | 5212           | 3343              | 6203              | 5597           | 3405              | 5994              |
| 2009 | Karnataka | 3492           | 2298              | 4289              | 4813           | 3096              | 5711              | 5161           | 3140              | 5528              |
| 2010 | Karnataka | 3182           | 2103              | 3893              | 4385           | 2829              | 5186              | 4695           | 2856              | 5028              |
| 2011 | Karnataka | 2865           | 1902              | 3489              | 3945           | 2554              | 4651              | 4219           | 2566              | 4518              |
| 2012 | Karnataka | 2494           | 1665              | 3026              | 3433           | 2232              | 4036              | 3667           | 2231              | 3927              |
| 2013 | Karnataka | 2124           | 1416              | 2574              | 2923           | 1899              | 3433              | 3119           | 1898              | 3341              |
| 2014 | Karnataka | 1711           | 1140              | 2073              | 2354           | 1529              | 2764              | 2512           | 1528              | 2690              |
| 2015 | Karnataka | 1331           | 887               | 1611              | 1831           | 1188              | 2149              | 1952           | 1188              | 2091              |
| 2000 | Kerala    | 484            | 307               | 639               | 667            | 417               | 836               | 715            | 435               | 766               |
| 2001 | Kerala    | 467            | 296               | 617               | 644            | 403               | 807               | 690            | 420               | 739               |
| 2002 | Kerala    | 452            | 286               | 596               | 622            | 389               | 779               | 667            | 406               | 714               |
| 2003 | Kerala    | 438            | 277               | 577               | 604            | 377               | 755               | 646            | 393               | 692               |
| 2004 | Kerala    | 426            | 269               | 560               | 587            | 366               | 733               | 627            | 381               | 671               |
| 2005 | Kerala    | 417            | 266               | 543               | 574            | 361               | 712               | 611            | 372               | 655               |
| 2006 | Kerala    | 412            | 267               | 530               | 565            | 360               | 696               | 600            | 365               | 643               |
| 2007 | Kerala    | 408            | 269               | 519               | 559            | 361               | 682               | 592            | 360               | 634               |
| 2008 | Kerala    | 406            | 267               | 515               | 557            | 358               | 676               | 587            | 357               | 629               |
| 2009 | Kerala    | 404            | 265               | 511               | 554            | 355               | 672               | 583            | 355               | 624               |
| 2010 | Kerala    | 403            | 264               | 509               | 552            | 354               | 669               | 581            | 353               | 622               |
| 2011 | Kerala    | 402            | 263               | 508               | 550            | 353               | 668               | 579            | 353               | 621               |
| 2012 | Kerala    | 398            | 261               | 504               | 545            | 349               | 662               | 574            | 349               | 615               |
| 2013 | Kerala    | 400            | 262               | 507               | 548            | 351               | 666               | 577            | 351               | 618               |

Spn = *Streptococcus pneumoniae* ; pna = pneumonia; hiv = HIV-infected deaths only; lb = lower bound; ub = upper bound

### Spn pneumonia mortality sensitivity results in India by state and year

| Year | State          | Spn pna |           |           | Spn pna |           |           | Spn pna |           |           |
|------|----------------|---------|-----------|-----------|---------|-----------|-----------|---------|-----------|-----------|
|      |                | deaths  | deaths_lb | deaths_ub | deaths  | deaths_lb | deaths_ub | deaths  | deaths_lb | deaths_ub |
| 2014 | Kerala         | 399     | 261       | 506       | 547     | 350       | 664       | 576     | 350       | 617       |
| 2015 | Kerala         | 403     | 264       | 510       | 552     | 354       | 670       | 581     | 354       | 623       |
| 2000 | Madhya Pradesh | 16532   | 10942     | 20001     | 23346   | 15056     | 27330     | 26608   | 16187     | 28497     |
| 2001 | Madhya Pradesh | 15824   | 10473     | 19144     | 22345   | 14410     | 26159     | 25467   | 15493     | 27276     |
| 2002 | Madhya Pradesh | 15163   | 10035     | 18343     | 21411   | 13807     | 25064     | 24401   | 14845     | 26134     |
| 2003 | Madhya Pradesh | 14505   | 9597      | 17542     | 20480   | 13204     | 23970     | 23336   | 14197     | 24994     |
| 2004 | Madhya Pradesh | 13831   | 9146      | 16719     | 19526   | 12584     | 22844     | 22240   | 13530     | 23820     |
| 2005 | Madhya Pradesh | 13199   | 8753      | 15910     | 18629   | 12031     | 21751     | 21207   | 12901     | 22713     |
| 2006 | Madhya Pradesh | 12573   | 8362      | 15109     | 17741   | 11482     | 20668     | 20182   | 12278     | 21615     |
| 2007 | Madhya Pradesh | 11920   | 7954      | 14281     | 16815   | 10909     | 19546     | 19116   | 11630     | 20474     |
| 2008 | Madhya Pradesh | 11278   | 7521      | 13503     | 15906   | 10315     | 18482     | 18075   | 10996     | 19359     |
| 2009 | Madhya Pradesh | 10619   | 7079      | 12711     | 14976   | 9710      | 17397     | 17015   | 10351     | 18223     |
| 2010 | Madhya Pradesh | 9980    | 6653      | 11946     | 14075   | 9126      | 16350     | 15991   | 9728      | 17126     |
| 2011 | Madhya Pradesh | 9398    | 6268      | 11253     | 13255   | 8596      | 15402     | 15063   | 9164      | 16133     |
| 2012 | Madhya Pradesh | 8813    | 5880      | 10558     | 12432   | 8066      | 14451     | 14133   | 8598      | 15137     |
| 2013 | Madhya Pradesh | 9030    | 5789      | 11420     | 12492   | 7879      | 15143     | 13518   | 8224      | 14478     |
| 2014 | Madhya Pradesh | 8597    | 5515      | 10879     | 11895   | 7506      | 14426     | 12877   | 7834      | 13792     |
| 2015 | Madhya Pradesh | 8239    | 5288      | 10430     | 11400   | 7196      | 13831     | 12346   | 7511      | 13223     |
| 2000 | Maharashtra    | 7569    | 4938      | 9404      | 10450   | 6677      | 12503     | 11252   | 6845      | 12051     |
| 2001 | Maharashtra    | 7062    | 4607      | 8774      | 9750    | 6230      | 11665     | 10498   | 6387      | 11244     |
| 2002 | Maharashtra    | 6554    | 4275      | 8141      | 9048    | 5781      | 10824     | 9741    | 5926      | 10433     |
| 2003 | Maharashtra    | 6049    | 3944      | 7511      | 8350    | 5333      | 9986      | 8987    | 5467      | 9625      |
| 2004 | Maharashtra    | 5560    | 3622      | 6898      | 7674    | 4898      | 9171      | 8254    | 5021      | 8840      |
| 2005 | Maharashtra    | 5108    | 3344      | 6311      | 7046    | 4515      | 8396      | 7571    | 4606      | 8109      |
| 2006 | Maharashtra    | 4665    | 3072      | 5739      | 6433    | 4139      | 7640      | 6904    | 4200      | 7394      |
| 2007 | Maharashtra    | 4226    | 2799      | 5175      | 5825    | 3765      | 6895      | 6244    | 3799      | 6687      |
| 2008 | Maharashtra    | 3830    | 2534      | 4685      | 5277    | 3408      | 6242      | 5652    | 3439      | 6054      |
| 2009 | Maharashtra    | 3424    | 2264      | 4184      | 4717    | 3044      | 5575      | 5049    | 3071      | 5407      |
| 2010 | Maharashtra    | 3025    | 1998      | 3693      | 4167    | 2687      | 4921      | 4456    | 2711      | 4773      |
| 2011 | Maharashtra    | 2710    | 1788      | 3304      | 3731    | 2405      | 4403      | 3987    | 2426      | 4270      |
| 2012 | Maharashtra    | 2360    | 1523      | 3071      | 3247    | 2058      | 4026      | 3465    | 2108      | 3711      |
| 2013 | Maharashtra    | 2051    | 1321      | 2664      | 2820    | 1786      | 3492      | 3006    | 1829      | 3219      |

Spn = *Streptococcus pneumoniae* ; pna = pneumonia; hiv = HIV-infected deaths only; lb = lower bound; ub = upper bound

**Spn pneumonia mortality sensitivity results in India by state and year**

| Year | State       | Spn pna deaths | Spn pna deaths_lb | Spn pna deaths_ub | Spn pna deaths | Spn pna deaths_lb | Spn pna deaths_ub | Spn pna deaths | Spn pna deaths_lb | Spn pna deaths_ub |
|------|-------------|----------------|-------------------|-------------------|----------------|-------------------|-------------------|----------------|-------------------|-------------------|
| 2014 | Maharashtra | 1753           | 1128              | 2274              | 2410           | 1524              | 2981              | 2566           | 1561              | 2748              |
| 2015 | Maharashtra | 1515           | 974               | 1964              | 2082           | 1316              | 2574              | 2216           | 1348              | 2373              |
| 2000 | Manipur     | 101            | 64                | 131               | 141            | 88                | 173               | 153            | 93                | 164               |
| 2001 | Manipur     | 97             | 61                | 125               | 134            | 84                | 165               | 146            | 89                | 157               |
| 2002 | Manipur     | 92             | 58                | 119               | 128            | 80                | 158               | 139            | 85                | 149               |
| 2003 | Manipur     | 88             | 54                | 121               | 122            | 74                | 158               | 133            | 81                | 142               |
| 2004 | Manipur     | 84             | 51                | 116               | 117            | 71                | 152               | 127            | 77                | 136               |
| 2005 | Manipur     | 82             | 50                | 114               | 114            | 69                | 148               | 124            | 75                | 133               |
| 2006 | Manipur     | 80             | 49                | 111               | 111            | 68                | 145               | 121            | 74                | 130               |
| 2007 | Manipur     | 80             | 49                | 111               | 111            | 67                | 144               | 121            | 73                | 129               |
| 2008 | Manipur     | 80             | 49                | 111               | 111            | 67                | 144               | 121            | 74                | 130               |
| 2009 | Manipur     | 80             | 49                | 111               | 111            | 68                | 144               | 121            | 74                | 130               |
| 2010 | Manipur     | 81             | 50                | 112               | 112            | 68                | 145               | 122            | 74                | 131               |
| 2011 | Manipur     | 81             | 50                | 112               | 113            | 69                | 146               | 123            | 75                | 131               |
| 2012 | Manipur     | 81             | 50                | 111               | 112            | 69                | 144               | 122            | 74                | 130               |
| 2013 | Manipur     | 80             | 49                | 110               | 111            | 68                | 143               | 121            | 73                | 129               |
| 2014 | Manipur     | 78             | 48                | 106               | 108            | 66                | 139               | 117            | 71                | 125               |
| 2015 | Manipur     | 75             | 46                | 102               | 104            | 64                | 134               | 113            | 69                | 121               |
| 2000 | Meghalaya   | 492            | 331               | 582               | 693            | 452               | 797               | 784            | 477               | 840               |
| 2001 | Meghalaya   | 512            | 344               | 605               | 721            | 471               | 829               | 815            | 496               | 873               |
| 2002 | Meghalaya   | 533            | 358               | 629               | 750            | 489               | 863               | 848            | 516               | 909               |
| 2003 | Meghalaya   | 553            | 371               | 652               | 778            | 507               | 895               | 879            | 535               | 942               |
| 2004 | Meghalaya   | 571            | 383               | 673               | 803            | 524               | 923               | 908            | 552               | 972               |
| 2005 | Meghalaya   | 588            | 396               | 692               | 828            | 541               | 950               | 935            | 569               | 1001              |
| 2006 | Meghalaya   | 604            | 408               | 710               | 850            | 556               | 974               | 959            | 584               | 1027              |
| 2007 | Meghalaya   | 618            | 418               | 724               | 869            | 570               | 995               | 981            | 597               | 1051              |
| 2008 | Meghalaya   | 634            | 430               | 744               | 892            | 585               | 1021              | 1007           | 613               | 1079              |
| 2009 | Meghalaya   | 639            | 430               | 754               | 900            | 588               | 1035              | 1018           | 619               | 1090              |
| 2010 | Meghalaya   | 666            | 446               | 791               | 939            | 611               | 1084              | 1064           | 647               | 1139              |
| 2011 | Meghalaya   | 688            | 459               | 821               | 970            | 629               | 1125              | 1100           | 669               | 1179              |
| 2012 | Meghalaya   | 705            | 468               | 846               | 995            | 643               | 1158              | 1130           | 688               | 1210              |
| 2013 | Meghalaya   | 732            | 486               | 879               | 1033           | 668               | 1203              | 1174           | 714               | 1258              |

Spn = *Streptococcus pneumoniae* ; pna = pneumonia; hiv = HIV-infected deaths only; lb = lower bound; ub = upper bound

### Spn pneumonia mortality sensitivity results in India by state and year

| Year | State     | Spn pna deaths | Spn pna deaths_lb | Spn pna deaths_ub | Spn pna deaths | Spn pna deaths_lb | Spn pna deaths_ub | Spn pna deaths | Spn pna deaths_lb | Spn pna deaths_ub |
|------|-----------|----------------|-------------------|-------------------|----------------|-------------------|-------------------|----------------|-------------------|-------------------|
| 2014 | Meghalaya | 755            | 502               | 907               | 1065           | 689               | 1240              | 1211           | 737               | 1297              |
| 2015 | Meghalaya | 781            | 519               | 938               | 1101           | 713               | 1283              | 1253           | 762               | 1342              |
| 2000 | Mizoram   | 153            | 101               | 186               | 216            | 139               | 254               | 247            | 150               | 264               |
| 2001 | Mizoram   | 148            | 98                | 180               | 209            | 135               | 245               | 239            | 145               | 255               |
| 2002 | Mizoram   | 145            | 96                | 176               | 205            | 132               | 241               | 234            | 142               | 251               |
| 2003 | Mizoram   | 143            | 95                | 174               | 202            | 130               | 237               | 231            | 140               | 247               |
| 2004 | Mizoram   | 141            | 93                | 172               | 200            | 129               | 234               | 228            | 139               | 244               |
| 2005 | Mizoram   | 140            | 92                | 169               | 197            | 127               | 231               | 225            | 137               | 241               |
| 2006 | Mizoram   | 139            | 92                | 168               | 196            | 126               | 230               | 223            | 136               | 239               |
| 2007 | Mizoram   | 138            | 91                | 167               | 195            | 126               | 229               | 222            | 135               | 238               |
| 2008 | Mizoram   | 137            | 91                | 166               | 194            | 125               | 227               | 221            | 134               | 236               |
| 2009 | Mizoram   | 136            | 90                | 164               | 191            | 123               | 224               | 218            | 133               | 233               |
| 2010 | Mizoram   | 133            | 89                | 161               | 188            | 122               | 220               | 214            | 130               | 230               |
| 2011 | Mizoram   | 134            | 89                | 161               | 189            | 122               | 220               | 215            | 131               | 230               |
| 2012 | Mizoram   | 132            | 88                | 159               | 186            | 121               | 217               | 212            | 129               | 227               |
| 2013 | Mizoram   | 132            | 88                | 158               | 186            | 121               | 217               | 212            | 129               | 227               |
| 2014 | Mizoram   | 130            | 86                | 156               | 183            | 119               | 213               | 208            | 127               | 223               |
| 2015 | Mizoram   | 136            | 87                | 172               | 188            | 118               | 228               | 204            | 124               | 218               |
| 2000 | Nagaland  | 107            | 67                | 138               | 148            | 92                | 182               | 161            | 98                | 173               |
| 2001 | Nagaland  | 113            | 72                | 147               | 157            | 98                | 194               | 171            | 104               | 184               |
| 2002 | Nagaland  | 121            | 77                | 157               | 168            | 105               | 207               | 183            | 111               | 196               |
| 2003 | Nagaland  | 129            | 82                | 167               | 179            | 112               | 221               | 195            | 119               | 209               |
| 2004 | Nagaland  | 137            | 86                | 177               | 190            | 118               | 234               | 207            | 126               | 221               |
| 2005 | Nagaland  | 142            | 89                | 184               | 197            | 123               | 243               | 215            | 131               | 230               |
| 2006 | Nagaland  | 145            | 91                | 189               | 201            | 125               | 249               | 220            | 134               | 235               |
| 2007 | Nagaland  | 147            | 92                | 192               | 204            | 127               | 253               | 223            | 136               | 239               |
| 2008 | Nagaland  | 149            | 93                | 194               | 206            | 128               | 256               | 225            | 137               | 241               |
| 2009 | Nagaland  | 145            | 91                | 190               | 201            | 125               | 251               | 220            | 134               | 236               |
| 2010 | Nagaland  | 151            | 94                | 198               | 209            | 129               | 261               | 229            | 139               | 245               |
| 2011 | Nagaland  | 150            | 93                | 197               | 208            | 128               | 260               | 228            | 139               | 244               |
| 2012 | Nagaland  | 146            | 91                | 193               | 203            | 125               | 254               | 222            | 135               | 238               |
| 2013 | Nagaland  | 142            | 88                | 187               | 197            | 121               | 246               | 216            | 131               | 231               |

Spn = *Streptococcus pneumoniae* ; pna = pneumonia; hiv = HIV-infected deaths only; lb = lower bound; ub = upper bound

**Spn pneumonia mortality sensitivity results in India by state and year**

| Year | State    | Spn pna |           | Spn pna   |        |           | Spn pna   |        | Spn pna   |           |
|------|----------|---------|-----------|-----------|--------|-----------|-----------|--------|-----------|-----------|
|      |          | deaths  | deaths_lb | deaths_ub | deaths | deaths_lb | deaths_ub | deaths | deaths_lb | deaths_ub |
| 2014 | Nagaland | 134     | 83        | 176       | 186    | 114       | 232       | 203    | 124       | 218       |
| 2015 | Nagaland | 125     | 78        | 165       | 174    | 107       | 217       | 190    | 116       | 204       |
| 2000 | Odisha   | 7395    | 4931      | 8846      | 10428  | 6762      | 12108     | 11844  | 7206      | 12686     |
| 2001 | Odisha   | 6988    | 4660      | 8359      | 9854   | 6390      | 11442     | 11192  | 6809      | 11987     |
| 2002 | Odisha   | 6578    | 4386      | 7868      | 9275   | 6015      | 10770     | 10535  | 6409      | 11284     |
| 2003 | Odisha   | 6210    | 4141      | 7429      | 8757   | 5679      | 10169     | 9948   | 6052      | 10654     |
| 2004 | Odisha   | 5845    | 3899      | 6994      | 8243   | 5346      | 9573      | 9364   | 5697      | 10029     |
| 2005 | Odisha   | 5502    | 3667      | 6587      | 7759   | 5030      | 9015      | 8816   | 5363      | 9442      |
| 2006 | Odisha   | 5172    | 3444      | 6197      | 7294   | 4726      | 8480      | 8289   | 5043      | 8878      |
| 2007 | Odisha   | 4815    | 3204      | 5773      | 6791   | 4398      | 7899      | 7719   | 4696      | 8267      |
| 2008 | Odisha   | 4484    | 2985      | 5378      | 6326   | 4097      | 7359      | 7191   | 4375      | 7702      |
| 2009 | Odisha   | 4143    | 2759      | 4971      | 5845   | 3787      | 6802      | 6646   | 4043      | 7118      |
| 2010 | Odisha   | 3825    | 2549      | 4592      | 5397   | 3498      | 6283      | 6139   | 3735      | 6576      |
| 2011 | Odisha   | 3800    | 2431      | 4819      | 5258   | 3312      | 6388      | 5695   | 3465      | 6100      |
| 2012 | Odisha   | 3488    | 2233      | 4427      | 4828   | 3042      | 5868      | 5232   | 3183      | 5603      |
| 2013 | Odisha   | 3230    | 2068      | 4101      | 4471   | 2818      | 5435      | 4846   | 2948      | 5190      |
| 2014 | Odisha   | 2950    | 1890      | 3746      | 4083   | 2574      | 4965      | 4427   | 2693      | 4742      |
| 2015 | Odisha   | 2697    | 1728      | 3426      | 3734   | 2354      | 4541      | 4048   | 2463      | 4336      |
| 2000 | Punjab   | 2454    | 1633      | 2975      | 3376   | 2190      | 3967      | 3603   | 2192      | 3859      |
| 2001 | Punjab   | 2290    | 1524      | 2777      | 3151   | 2044      | 3703      | 3363   | 2046      | 3602      |
| 2002 | Punjab   | 2132    | 1419      | 2585      | 2934   | 1903      | 3447      | 3130   | 1904      | 3353      |
| 2003 | Punjab   | 1984    | 1319      | 2403      | 2729   | 1769      | 3205      | 2911   | 1771      | 3117      |
| 2004 | Punjab   | 1841    | 1223      | 2227      | 2531   | 1640      | 2970      | 2698   | 1641      | 2889      |
| 2005 | Punjab   | 1705    | 1139      | 2054      | 2343   | 1525      | 2741      | 2494   | 1517      | 2671      |
| 2006 | Punjab   | 1575    | 1059      | 1888      | 2163   | 1414      | 2521      | 2299   | 1398      | 2462      |
| 2007 | Punjab   | 1447    | 970       | 1726      | 1987   | 1296      | 2307      | 2108   | 1282      | 2257      |
| 2008 | Punjab   | 1325    | 887       | 1579      | 1819   | 1185      | 2110      | 1928   | 1173      | 2065      |
| 2009 | Punjab   | 1204    | 805       | 1434      | 1652   | 1076      | 1916      | 1750   | 1065      | 1875      |
| 2010 | Punjab   | 1091    | 730       | 1300      | 1498   | 976       | 1738      | 1587   | 966       | 1700      |
| 2011 | Punjab   | 993     | 664       | 1183      | 1363   | 888       | 1581      | 1444   | 878       | 1546      |
| 2012 | Punjab   | 899     | 600       | 1069      | 1233   | 802       | 1428      | 1304   | 794       | 1397      |
| 2013 | Punjab   | 828     | 552       | 982       | 1134   | 737       | 1312      | 1198   | 729       | 1283      |

Spn = *Streptococcus pneumoniae* ; pna = pneumonia; hiv = HIV-infected deaths only; lb = lower bound; ub = upper bound

**Spn pneumonia mortality sensitivity results in India by state and year**

| Year | State     | Spn pna |           |           | Spn pna |           |           | Spn pna |           |           |
|------|-----------|---------|-----------|-----------|---------|-----------|-----------|---------|-----------|-----------|
|      |           | deaths  | deaths_lb | deaths_ub | deaths  | deaths_lb | deaths_ub | deaths  | deaths_lb | deaths_ub |
| 2014 | Punjab    | 764     | 513       | 961       | 1046    | 683       | 1264      | 1102    | 671       | 1180      |
| 2015 | Punjab    | 721     | 482       | 903       | 987     | 643       | 1189      | 1036    | 631       | 1110      |
| 2000 | Rajasthan | 13329   | 8901      | 15907     | 18790   | 12198     | 21781     | 21326   | 12974     | 22841     |
| 2001 | Rajasthan | 12773   | 8530      | 15244     | 18006   | 11689     | 20872     | 20436   | 12433     | 21888     |
| 2002 | Rajasthan | 12203   | 8149      | 14563     | 17203   | 11167     | 19940     | 19524   | 11877     | 20910     |
| 2003 | Rajasthan | 11570   | 7724      | 13804     | 16309   | 10586     | 18902     | 18507   | 11259     | 19822     |
| 2004 | Rajasthan | 10916   | 7285      | 13018     | 15385   | 9983      | 17825     | 17453   | 10618     | 18693     |
| 2005 | Rajasthan | 10251   | 6855      | 12202     | 14445   | 9387      | 16713     | 16380   | 9965      | 17543     |
| 2006 | Rajasthan | 9582    | 6422      | 11384     | 13501   | 8788      | 15598     | 15303   | 9309      | 16389     |
| 2007 | Rajasthan | 8904    | 5983      | 10560     | 12544   | 8181      | 14475     | 14215   | 8648      | 15225     |
| 2008 | Rajasthan | 8261    | 5552      | 9798      | 11639   | 7591      | 13431     | 13189   | 8024      | 14126     |
| 2009 | Rajasthan | 8193    | 5314      | 10218     | 11315   | 7199      | 13575     | 12191   | 7417      | 13057     |
| 2010 | Rajasthan | 7548    | 4899      | 9420      | 10426   | 6637      | 12515     | 11239   | 6837      | 12037     |
| 2011 | Rajasthan | 6944    | 4509      | 8671      | 9593    | 6109      | 11520     | 10345   | 6294      | 11080     |
| 2012 | Rajasthan | 6311    | 4099      | 7882      | 8719    | 5553      | 10472     | 9404    | 5721      | 10072     |
| 2013 | Rajasthan | 5816    | 3778      | 7263      | 8035    | 5117      | 9650      | 8666    | 5272      | 9282      |
| 2014 | Rajasthan | 5361    | 3482      | 6695      | 7406    | 4717      | 8895      | 7988    | 4860      | 8556      |
| 2015 | Rajasthan | 5040    | 3274      | 6294      | 6963    | 4435      | 8363      | 7510    | 4569      | 8043      |
| 2000 | Sikkim    | 40      | 26        | 50        | 56      | 36        | 67        | 60      | 37        | 64        |
| 2001 | Sikkim    | 38      | 25        | 47        | 52      | 33        | 63        | 56      | 34        | 60        |
| 2002 | Sikkim    | 35      | 23        | 44        | 48      | 31        | 58        | 52      | 32        | 56        |
| 2003 | Sikkim    | 32      | 21        | 40        | 45      | 29        | 53        | 48      | 29        | 51        |
| 2004 | Sikkim    | 29      | 19        | 37        | 41      | 26        | 49        | 44      | 27        | 47        |
| 2005 | Sikkim    | 27      | 17        | 34        | 37      | 24        | 45        | 40      | 24        | 43        |
| 2006 | Sikkim    | 25      | 16        | 31        | 34      | 21        | 41        | 37      | 22        | 39        |
| 2007 | Sikkim    | 22      | 14        | 29        | 31      | 19        | 38        | 34      | 21        | 36        |
| 2008 | Sikkim    | 21      | 13        | 27        | 29      | 18        | 36        | 32      | 19        | 34        |
| 2009 | Sikkim    | 20      | 13        | 25        | 27      | 17        | 34        | 30      | 18        | 32        |
| 2010 | Sikkim    | 19      | 12        | 24        | 26      | 17        | 32        | 29      | 17        | 31        |
| 2011 | Sikkim    | 18      | 12        | 23        | 26      | 16        | 31        | 28      | 17        | 30        |
| 2012 | Sikkim    | 18      | 12        | 22        | 25      | 16        | 30        | 27      | 16        | 28        |
| 2013 | Sikkim    | 17      | 11        | 23        | 24      | 15        | 30        | 26      | 16        | 28        |

Spn = *Streptococcus pneumoniae* ; pna = pneumonia; hiv = HIV-infected deaths only; lb = lower bound; ub = upper bound

**Spn pneumonia mortality sensitivity results in India by state and year**

| Year | State      | Spn pna deaths | Spn pna deaths_lb | Spn pna deaths_ub | Spn pna deaths | Spn pna deaths_lb | Spn pna deaths_ub | Spn pna deaths | Spn pna deaths_lb | Spn pna deaths_ub |
|------|------------|----------------|-------------------|-------------------|----------------|-------------------|-------------------|----------------|-------------------|-------------------|
| 2014 | Sikkim     | 17             | 11                | 23                | 23             | 15                | 30                | 25             | 15                | 27                |
| 2015 | Sikkim     | 17             | 11                | 23                | 23             | 14                | 29                | 25             | 15                | 27                |
| 2000 | Tamil Nadu | 3610           | 2357              | 4482              | 4984           | 3186              | 5960              | 5365           | 3264              | 5746              |
| 2001 | Tamil Nadu | 3433           | 2241              | 4262              | 4739           | 3029              | 5667              | 5101           | 3103              | 5463              |
| 2002 | Tamil Nadu | 3248           | 2120              | 4032              | 4484           | 2866              | 5361              | 4826           | 2936              | 5169              |
| 2003 | Tamil Nadu | 3062           | 1997              | 3799              | 4226           | 2700              | 5051              | 4547           | 2766              | 4870              |
| 2004 | Tamil Nadu | 2872           | 1872              | 3560              | 3963           | 2531              | 4734              | 4262           | 2593              | 4564              |
| 2005 | Tamil Nadu | 2677           | 1754              | 3306              | 3693           | 2367              | 4399              | 3967           | 2414              | 4249              |
| 2006 | Tamil Nadu | 2484           | 1636              | 3056              | 3426           | 2205              | 4068              | 3677           | 2237              | 3938              |
| 2007 | Tamil Nadu | 2289           | 1517              | 2804              | 3155           | 2040              | 3736              | 3383           | 2058              | 3623              |
| 2008 | Tamil Nadu | 2109           | 1397              | 2583              | 2907           | 1879              | 3441              | 3116           | 1896              | 3337              |
| 2009 | Tamil Nadu | 1937           | 1276              | 2377              | 2670           | 1719              | 3166              | 2862           | 1741              | 3066              |
| 2010 | Tamil Nadu | 1778           | 1166              | 2188              | 2452           | 1573              | 2912              | 2629           | 1599              | 2816              |
| 2011 | Tamil Nadu | 1633           | 1037              | 2158              | 2252           | 1411              | 2823              | 2416           | 1470              | 2587              |
| 2012 | Tamil Nadu | 1485           | 938               | 1967              | 2048           | 1278              | 2573              | 2198           | 1337              | 2354              |
| 2013 | Tamil Nadu | 1368           | 864               | 1812              | 1887           | 1177              | 2370              | 2025           | 1232              | 2169              |
| 2014 | Tamil Nadu | 1260           | 796               | 1670              | 1738           | 1085              | 2184              | 1865           | 1135              | 1998              |
| 2015 | Tamil Nadu | 1201           | 758               | 1591              | 1656           | 1033              | 2080              | 1777           | 1081              | 1903              |
| 2000 | Tripura    | 204            | 131               | 260               | 283            | 178               | 345               | 307            | 187               | 329               |
| 2001 | Tripura    | 184            | 118               | 234               | 255            | 160               | 310               | 276            | 168               | 296               |
| 2002 | Tripura    | 168            | 107               | 214               | 232            | 146               | 283               | 252            | 153               | 270               |
| 2003 | Tripura    | 153            | 98                | 194               | 211            | 133               | 257               | 229            | 139               | 245               |
| 2004 | Tripura    | 139            | 89                | 176               | 192            | 121               | 234               | 208            | 127               | 223               |
| 2005 | Tripura    | 128            | 82                | 162               | 177            | 112               | 215               | 192            | 117               | 206               |
| 2006 | Tripura    | 118            | 76                | 149               | 164            | 104               | 198               | 177            | 108               | 190               |
| 2007 | Tripura    | 111            | 72                | 140               | 154            | 98                | 186               | 166            | 101               | 178               |
| 2008 | Tripura    | 103            | 67                | 129               | 143            | 91                | 172               | 154            | 94                | 165               |
| 2009 | Tripura    | 97             | 63                | 121               | 134            | 85                | 160               | 144            | 88                | 154               |
| 2010 | Tripura    | 91             | 60                | 113               | 126            | 81                | 150               | 135            | 82                | 145               |
| 2011 | Tripura    | 86             | 57                | 106               | 119            | 77                | 141               | 127            | 78                | 136               |
| 2012 | Tripura    | 79             | 53                | 95                | 108            | 71                | 127               | 116            | 70                | 124               |
| 2013 | Tripura    | 71             | 47                | 86                | 98             | 63                | 115               | 104            | 63                | 112               |

Spn = *Streptococcus pneumoniae* ; pna = pneumonia; hiv = HIV-infected deaths only; lb = lower bound; ub = upper bound

**Spn pneumonia mortality sensitivity results in India by state and year**

| Year | State           | Spn pna deaths | Spn pna deaths_lb | Spn pna deaths_ub | Spn pna deaths | Spn pna deaths_lb | Spn pna deaths_ub | Spn pna deaths | Spn pna deaths_lb | Spn pna deaths_ub |
|------|-----------------|----------------|-------------------|-------------------|----------------|-------------------|-------------------|----------------|-------------------|-------------------|
| 2014 | Tripura         | 62             | 41                | 80                | 86             | 55                | 105               | 91             | 55                | 98                |
| 2015 | Tripura         | 54             | 35                | 69                | 74             | 47                | 90                | 78             | 48                | 84                |
| 2000 | Union Territory | 137            | 90                | 171               | 189            | 121               | 226               | 202            | 123               | 217               |
| 2001 | Union Territory | 131            | 86                | 162               | 180            | 115               | 215               | 192            | 117               | 206               |
| 2002 | Union Territory | 124            | 81                | 154               | 171            | 109               | 204               | 183            | 111               | 196               |
| 2003 | Union Territory | 119            | 77                | 150               | 163            | 104               | 198               | 174            | 106               | 187               |
| 2004 | Union Territory | 114            | 74                | 143               | 156            | 99                | 189               | 167            | 101               | 179               |
| 2005 | Union Territory | 108            | 71                | 135               | 148            | 95                | 179               | 158            | 96                | 169               |
| 2006 | Union Territory | 103            | 68                | 128               | 142            | 92                | 169               | 150            | 91                | 161               |
| 2007 | Union Territory | 99             | 67                | 121               | 136            | 89                | 161               | 143            | 87                | 153               |
| 2008 | Union Territory | 96             | 64                | 117               | 131            | 85                | 154               | 137            | 83                | 147               |
| 2009 | Union Territory | 91             | 60                | 110               | 124            | 80                | 146               | 130            | 79                | 139               |
| 2010 | Union Territory | 88             | 58                | 106               | 120            | 77                | 141               | 125            | 76                | 133               |
| 2011 | Union Territory | 85             | 56                | 104               | 116            | 75                | 137               | 121            | 74                | 130               |
| 2012 | Union Territory | 81             | 53                | 100               | 110            | 71                | 131               | 115            | 70                | 123               |
| 2013 | Union Territory | 78             | 51                | 96                | 106            | 69                | 127               | 111            | 68                | 119               |
| 2014 | Union Territory | 73             | 48                | 90                | 100            | 64                | 119               | 104            | 63                | 112               |
| 2015 | Union Territory | 68             | 44                | 83                | 92             | 59                | 110               | 97             | 59                | 104               |
| 2000 | Uttar Pradesh   | 47572          | 32041             | 56025             | 66940          | 43735             | 76857             | 75635          | 46013             | 81007             |
| 2001 | Uttar Pradesh   | 45642          | 30741             | 53752             | 64224          | 41960             | 73739             | 72567          | 44146             | 77721             |
| 2002 | Uttar Pradesh   | 43666          | 29411             | 51427             | 61445          | 40146             | 70550             | 69428          | 42237             | 74360             |
| 2003 | Uttar Pradesh   | 41672          | 28072             | 49085             | 58641          | 38317             | 67337             | 66266          | 40314             | 70973             |
| 2004 | Uttar Pradesh   | 39597          | 26681             | 46654             | 55725          | 36419             | 64001             | 62984          | 38317             | 67457             |
| 2005 | Uttar Pradesh   | 37422          | 25185             | 44141             | 52671          | 34391             | 60543             | 59548          | 36227             | 63778             |
| 2006 | Uttar Pradesh   | 35281          | 23716             | 41663             | 49663          | 32399             | 57133             | 56165          | 34168             | 60154             |
| 2007 | Uttar Pradesh   | 33075          | 22207             | 39102             | 46563          | 30351             | 53610             | 52674          | 32045             | 56416             |
| 2008 | Uttar Pradesh   | 30915          | 20766             | 36565             | 43529          | 28381             | 50131             | 49256          | 29965             | 52755             |
| 2009 | Uttar Pradesh   | 28792          | 19349             | 34069             | 40544          | 26444             | 46710             | 45894          | 27920             | 49154             |
| 2010 | Uttar Pradesh   | 26709          | 17960             | 31624             | 37618          | 24546             | 43357             | 42601          | 25916             | 45626             |
| 2011 | Uttar Pradesh   | 26549          | 17244             | 33040             | 36654          | 23345             | 43909             | 39462          | 24007             | 42265             |
| 2012 | Uttar Pradesh   | 24243          | 15759             | 30195             | 33478          | 21335             | 40128             | 36064          | 21940             | 38626             |
| 2013 | Uttar Pradesh   | 22358          | 14541             | 27861             | 30879          | 19686             | 37026             | 33277          | 20244             | 35640             |

Spn = *Streptococcus pneumoniae* ; pna = pneumonia; hiv = HIV-infected deaths only; lb = lower bound; ub = upper bound



**Spn pneumonia mortality sensitivity results in India by state and year**

| Year | State         | Spn pna deaths | Spn pna deaths_lb | Spn pna deaths_ub | Spn pna deaths | Spn pna deaths_lb | Spn pna deaths_ub | Spn pna deaths | Spn pna deaths_lb | Spn pna deaths_ub |
|------|---------------|----------------|-------------------|-------------------|----------------|-------------------|-------------------|----------------|-------------------|-------------------|
| 2014 | Uttar Pradesh | 20487          | 13329             | 25538             | 28298          | 18045             | 33939             | 30502          | 18556             | 32669             |
| 2015 | Uttar Pradesh | 18909          | 12302             | 23571             | 26119          | 16655             | 31325             | 28153          | 17127             | 30153             |
| 2000 | Uttarakhand   | 1061           | 715               | 1251              | 1494           | 976               | 1716              | 1688           | 1027              | 1808              |
| 2001 | Uttarakhand   | 1015           | 684               | 1197              | 1429           | 934               | 1643              | 1616           | 983               | 1731              |
| 2002 | Uttarakhand   | 969            | 653               | 1143              | 1364           | 891               | 1568              | 1543           | 938               | 1652              |
| 2003 | Uttarakhand   | 990            | 646               | 1227              | 1366           | 873               | 1631              | 1469           | 894               | 1573              |
| 2004 | Uttarakhand   | 937            | 613               | 1163              | 1294           | 828               | 1547              | 1393           | 848               | 1492              |
| 2005 | Uttarakhand   | 883            | 573               | 1103              | 1220           | 777               | 1465              | 1316           | 800               | 1409              |
| 2006 | Uttarakhand   | 830            | 536               | 1043              | 1147           | 727               | 1384              | 1240           | 754               | 1328              |
| 2007 | Uttarakhand   | 777            | 498               | 981               | 1075           | 678               | 1302              | 1162           | 707               | 1245              |
| 2008 | Uttarakhand   | 726            | 467               | 919               | 1005           | 635               | 1218              | 1088           | 662               | 1165              |
| 2009 | Uttarakhand   | 674            | 433               | 853               | 933            | 590               | 1131              | 1010           | 615               | 1082              |
| 2010 | Uttarakhand   | 621            | 399               | 786               | 860            | 543               | 1042              | 931            | 566               | 997               |
| 2011 | Uttarakhand   | 566            | 363               | 716               | 783            | 494               | 949               | 848            | 516               | 908               |
| 2012 | Uttarakhand   | 502            | 323               | 635               | 694            | 439               | 842               | 752            | 458               | 805               |
| 2013 | Uttarakhand   | 446            | 287               | 565               | 618            | 390               | 749               | 669            | 407               | 716               |
| 2014 | Uttarakhand   | 393            | 253               | 497               | 544            | 344               | 659               | 589            | 358               | 631               |
| 2015 | Uttarakhand   | 348            | 224               | 440               | 481            | 304               | 584               | 521            | 317               | 558               |
| 2000 | West Bengal   | 8496           | 5570              | 10494             | 11722          | 7517              | 13963             | 12595          | 7662              | 13490             |
| 2001 | West Bengal   | 7749           | 5080              | 9571              | 10690          | 6856              | 12735             | 11487          | 6988              | 12303             |
| 2002 | West Bengal   | 6964           | 4565              | 8601              | 9608           | 6161              | 11445             | 10323          | 6280              | 11057             |
| 2003 | West Bengal   | 6275           | 4113              | 7749              | 8657           | 5551              | 10311             | 9301           | 5658              | 9961              |
| 2004 | West Bengal   | 5697           | 3734              | 7035              | 7860           | 5039              | 9360              | 8443           | 5137              | 9043              |
| 2005 | West Bengal   | 5203           | 3413              | 6418              | 7176           | 4605              | 8541              | 7708           | 4689              | 8255              |
| 2006 | West Bengal   | 4757           | 3124              | 5863              | 6561           | 4213              | 7804              | 7045           | 4286              | 7545              |
| 2007 | West Bengal   | 4341           | 2854              | 5346              | 5987           | 3848              | 7116              | 6427           | 3910              | 6883              |
| 2008 | West Bengal   | 3923           | 2578              | 4828              | 5409           | 3475              | 6427              | 5804           | 3531              | 6216              |
| 2009 | West Bengal   | 3517           | 2314              | 4323              | 4849           | 3118              | 5756              | 5201           | 3164              | 5571              |
| 2010 | West Bengal   | 3250           | 2141              | 3990              | 4480           | 2884              | 5313              | 4804           | 2922              | 5145              |
| 2011 | West Bengal   | 3104           | 2047              | 3806              | 4278           | 2756              | 5069              | 4585           | 2789              | 4911              |
| 2012 | West Bengal   | 2969           | 1961              | 3637              | 4092           | 2639              | 4844              | 4384           | 2667              | 4696              |
| 2013 | West Bengal   | 2940           | 1942              | 3600              | 4051           | 2613              | 4796              | 4340           | 2640              | 4649              |

Spn = *Streptococcus pneumoniae* ; pna = pneumonia; hiv = HIV-infected deaths only; lb = lower bound; ub = upper bound

**Spn pneumonia mortality sensitivity results in India by state and year**

| Year | State       | Spn pna deaths | Spn pna deaths_lb | Spn pna deaths_ub | Spn pna deaths | Spn pna deaths_lb | Spn pna deaths_ub | Spn pna deaths | Spn pna deaths_lb | Spn pna deaths_ub |
|------|-------------|----------------|-------------------|-------------------|----------------|-------------------|-------------------|----------------|-------------------|-------------------|
| 2014 | West Bengal | 2932           | 1936              | 3591              | 4041           | 2606              | 4783              | 4329           | 2633              | 4636              |
| 2015 | West Bengal | 2965           | 1958              | 3631              | 4086           | 2635              | 4836              | 4377           | 2663              | 4687              |

Spn = *Streptococcus pneumoniae*; pna = pneumonia; hiv = HIV-infected deaths only; lb = lower bound; ub = upper bound
